# Supplementary material for: HClO4 catalysed aldol-type reaction of fluorinated silyl enol ethers with acetals or ketals toward fluoroalkyl ethers
Source: Royal Society of Chemistry journal article supplement (doi:10.1039/c9ob02129a), 2019-01-01

# HClO<sub>4</sub> catalysed aldol-type reaction of fluorinated silyl enol ethers with acetals or ketals toward fluoroalkyl ethers

You-Ping Tian,<sup>a</sup> Yi Gong,<sup>b</sup> Xiao-Si Hu,<sup>b</sup> Jin-Sheng Yu,<sup>\*b</sup> Ying Zhou,<sup>\*a</sup> and Jian Zhou<sup>\*b,a,c</sup>

<sup>a</sup> College of Pharmacy, Guizhou University of Traditional Chinese Medicine, Guiyang 550025 China. E-mail: zhouy@gzu.edu.cn (Y. Zhou)

<sup>b</sup> Shanghai Engineering Research Center of Molecular Therapeutics and New Drug Development, Shanghai Key Laboratory of Green Chemistry and Chemical Processes, School of Chemistry and Molecular Engineering, East China Normal University, Shanghai 200062, China. E-mail: jsyu@chem.ecnu.edu.cn (J.-S. Yu); jzhou@chem.ecnu.edu.cn (J. Zhou)

<sup>c</sup> State Key Laboratory of Organometallic Chemistry, Shanghai Institute of Organic Chemistry, CAS, Shanghai 200032, China.

|                 | <b>Contents</b>                                              | <b>Page</b> |
|-----------------|--------------------------------------------------------------|-------------|
|                 | General information                                          | 2           |
| <b>Part I</b>   | General procedure for the aldol-type reactions               | 3-16        |
| <b>Part II</b>  | Gram-scale synthesis                                         | 17          |
| <b>Part III</b> | Product transformation                                       | 17-19       |
| <b>Part IV</b>  | <sup>1</sup> H, <sup>13</sup> C, <sup>19</sup> F NMR spectra | 20-163      |

**General information:** Reactions were monitored by thin layer chromatography using UV light to visualize the course of reaction. Purification of reaction products was carried out by flash chromatography on silica gel. Chemical yields refer to pure isolated substances. The infrared (IR) spectra were obtained using a Bruker tensor 27 infrared spectrometer.  $^1\text{H}$ ,  $^{13}\text{C}$ ,  $^{19}\text{F}$  NMR spectra were obtained using a Bruker DPX-600, 500, 400 or 300 MHz spectrometer. Chemical shifts are reported in ppm from  $\text{CDCl}_3$  with the solvent resonance as the internal standard. The following abbreviations were used to designate chemical shift multiplicities: s = singlet, d = doublet, t = triplet, q = quartet, h = heptet, m = multiplet, br = broad.

Anhydrous  $\text{CH}_2\text{Cl}_2$  and  $\text{CH}_3\text{CN}$  were prepared by first distillation over  $\text{P}_2\text{O}_5$  and then from  $\text{CaH}_2$ . Anhydrous THF and toluene were prepared by distillation over sodium-benzophenone ketyl prior to use. Anhydrous EtOAc was prepared by first distillation over activated  $\text{CaSO}_4$  and then stored in 5Å molecular sieves. Absolute MeOH was treated by stirring commercial anhydrous methanol over magnesium chips, then distilled and stored under  $\text{N}_2$  atmosphere.  $\text{HClO}_4$  (70% wt., aq.) is purchased from Sinopharm Chemical Reagent Co., Ltd and used as received. The substrates acetal **1** or ketals **4**,<sup>1</sup> were prepared following literature reports. The fluorinated silyl enol ethers **2** were prepared according to the literature reports.<sup>2</sup>

---

<sup>1</sup> a) M. Blümel, S. Nagasawa, K. Blackford, S. R. Hare, D. J. Tantillo, R. Sarpong, *J. Am. Chem. Soc.*, 2018, **140**, 9291; b) K. Wu, A. G. Doyle, *Nature Chem.*, 2017, **9**, 779.

<sup>2</sup> a) H. Amii, T. Kobayashi, Y. Hatamoto and K. Uneyama, *Chem. Commun.*, **1999**, 1323; b) G. K. S. Prakash, J. Hu and G. A. Olah, *J. Fluorine Chem.*, 2001, **112**, 355; c) É. Bélanger, K. Cantin, O. Messe, M. Tremblay and J.-F. Paquin, *J. Am. Chem. Soc.*, 2007, **129**, 1034.

## Part I. General procedure for the catalytic aldol-type reactions.

### 1) Procedure for the catalytic aldol-type reactions with acetals **1**

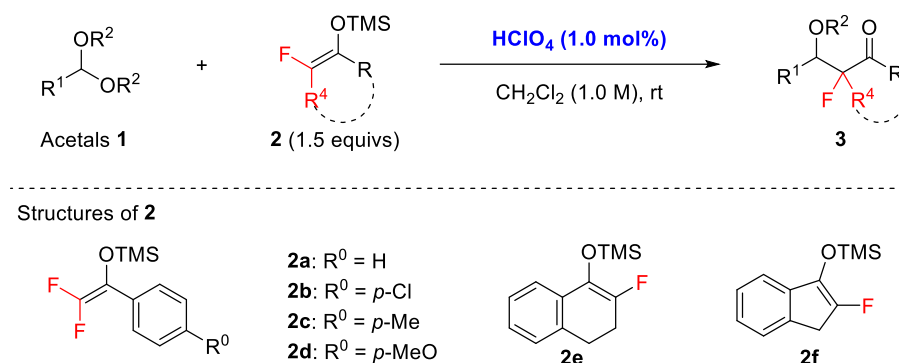

**General procedure:** To a stirred mixture of acetals **1** (1.0 mmol, 1.0 equiv) and fluorinated silyl enol ethers **2** (1.5 mmol, 1.5 equivs) in anhydrous CH<sub>2</sub>Cl<sub>2</sub> (1.0 mL) in 5 mL vial was added HClO<sub>4</sub> (1.4 mg, 1.0 mol%, 70% wt., aq.) at room temperature under air conditions. The resulting mixture was then stirred at room temperature. After full conversion of acetals **1** by TLC analysis, the reaction was directly purified by flash column chromatography on silica gel to afford the desired fluoroalkyl ethers **3** using the petroleum ether (PE)/Et<sub>2</sub>O as eluents.

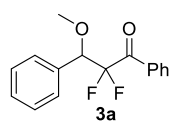

Column chromatography (PE/Et<sub>2</sub>O = 50:1, v/v) afforded product **3a**<sup>3</sup> in 98% yield as colorless oil; <sup>1</sup>H NMR (300 MHz, CDCl<sub>3</sub>): δ 8.06 (d, *J* = 7.8 Hz, 2H), 7.65-7.59 (m, 1H), 7.51-7.41 (m, 7H), 4.88 (dd, *J* = 19.1, 5.7 Hz, 1H), 3.30 (s, 3H); <sup>13</sup>C NMR (101 MHz, CDCl<sub>3</sub>): δ 191.09 (dd, *J* = 31.8, 25.6 Hz), 133.88, 133.47 (d, *J* = 2.6 Hz), 132.80, 130.02 (dd, *J* = 4.9, 2.0 Hz), 129.18, 128.77, 128.43, 128.35, 116.13 (dd, *J* = 265.7, 252.7 Hz), 82.15 (dd, *J* = 30.1, 22.1 Hz), 57.78; <sup>19</sup>F NMR (376 MHz, CDCl<sub>3</sub>): δ -103.55 (d, *J* = 274.0 Hz, 1F), -117.73 (d, *J* = 273.5 Hz, 1F); IR (ATR): 2939, 1699, 1598, 1448, 1276, 1217, 1001, 979, 903, 669.

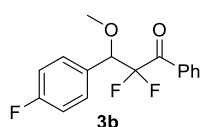

Column chromatography (PE/Et<sub>2</sub>O = 50:1, v/v) afforded product **3b** in 91% yield as colorless oil; <sup>1</sup>H NMR (300 MHz, CDCl<sub>3</sub>): δ 8.05 (d, *J* = 8.0 Hz, 2H), 7.63 (t, *J* = 7.4 Hz, 1H), 7.51-7.44 (m, 4H), 7.18-7.07 (m, 2H), 4.86 (dd, *J* = 18.9, 5.6 Hz, 1H), 3.28 (s, 3H); <sup>13</sup>C NMR (101 MHz, CDCl<sub>3</sub>): δ 190.92 (dd, *J* = 31.8, 25.7 Hz), 163.36 (d, *J* = 247.8 Hz), 134.01, 133.40 (d, *J* = 2.8 Hz), 130.55 (d, *J* = 8.4 Hz), 130.04 (dd, *J* = 5.0, 2.0 Hz), 128.64 (d, *J* = 3.4 Hz), 128.50, 115.98 (dd, *J* = 266.0, 252.5 Hz), 115.45 (d, *J* = 21.6 Hz), 81.50 (dd, *J* = 30.3, 22.1 Hz), 57.81; <sup>19</sup>F NMR (376 MHz, CDCl<sub>3</sub>): δ -103.82 (d, *J* = 275.3 Hz, 1F), -112.52 (s, 1F), -118.08 (d, *J* = 275.5 Hz, 1F); IR

<sup>3</sup> Y. Kodama, H. Yamane, M. Okumura, M. Shiro and T. Taguchi, *Tetrahedron*, 1995, **51**(45), 12217.

(ATR): 3030, 1693, 1597, 1448, 1290, 1219, 1101, 1074, 979, 852, 657, 586; HRMS (ESI): Exact mass calcd for C<sub>16</sub>H<sub>13</sub>F<sub>3</sub>NaO<sub>2</sub> [M+Na]<sup>+</sup>: 317.0760, Found: 317.0758.

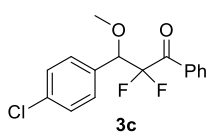

Column chromatography (PE/Et<sub>2</sub>O = 50:1, v/v) afforded product **3c** in 98% yield as colorless oil; <sup>1</sup>H NMR (600 MHz, CDCl<sub>3</sub>): δ 8.05 (d, *J* = 7.9 Hz, 2H), 7.63 (t, *J* = 6.5 Hz, 1H), 7.49 (t, *J* = 8.0 Hz, 2H), 7.43-7.39 (m, 4H), 4.85 (d, *J* = 18.8 Hz, 1H), 3.29

(s, 3H); <sup>13</sup>C NMR (101 MHz, CDCl<sub>3</sub>): δ 190.78 (dd, *J* = 31.8, 25.7 Hz), 135.25, 134.07, 133.33 (d, *J* = 2.9 Hz), 131.46, 130.13, 130.05 (dd, *J* = 5.0, 1.9 Hz), 128.69, 128.53, 115.90 (dd, *J* = 266.3, 252.9 Hz), 81.50 (dd, *J* = 30.2, 22.1 Hz), 57.92; <sup>19</sup>F NMR (376 MHz, CDCl<sub>3</sub>): δ -103.66 (d, *J* = 276.3 Hz, 1F), -118.03 (d, *J* = 276.6 Hz, 1F); IR (ATR): 3032, 1751, 1697, 1579, 1490, 1219, 1001, 858, 740; HRMS (ESI): Exact mass calcd for C<sub>16</sub>H<sub>13</sub>ClF<sub>2</sub>NaO<sub>2</sub> [M+Na]<sup>+</sup>: 333.0464, Found: 333.0457.

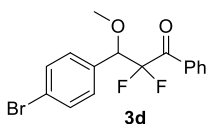

Column chromatography (PE/Et<sub>2</sub>O = 50:1, v/v) afforded product **3d** in 70% yield as colorless oil; <sup>1</sup>H NMR (300 MHz, CDCl<sub>3</sub>): δ 8.05 (d, *J* = 7.8 Hz, 2H), 7.65-7.55 (m, 3H), 7.49 (t, *J* = 7.7 Hz, 2H), 7.36 (d, *J* = 8.2 Hz, 2H), 4.84 (dd, *J* = 18.9, 5.4 Hz, 1H), 3.29 (s, 3H); <sup>13</sup>C NMR (101 MHz, CDCl<sub>3</sub>): δ 190.76 (dd, *J* = 31.8, 25.6 Hz), 134.08, 133.31 (d, *J* = 3.0 Hz), 131.98, 131.64, 130.43, 130.05 (dd, *J* = 4.9, 2.0 Hz), 128.53, 123.49, 115.83 (dd, *J* = 266.3, 252.9 Hz), 81.55 (dd, *J* = 30.3, 22.1 Hz), 57.95; <sup>19</sup>F NMR (282 MHz, CDCl<sub>3</sub>): δ -103.62 (dd, *J* = 276.4, 5.4 Hz, 1F), -118.03 (dd, *J* = 276.6, 17.4 Hz, 1F); IR (ATR): 2935, 1751, 1597, 1579, 1487, 1404, 1280, 1188,

1001, 896, 796; HRMS (ESI): Exact mass calcd for C<sub>16</sub>H<sub>13</sub>BrF<sub>2</sub>NaO<sub>2</sub> [M+Na]<sup>+</sup>: 376.9959, Found: 376.9950.

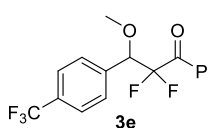

Column chromatography (PE/Et<sub>2</sub>O = 50:1, v/v) afforded product **3e** in 93% yield as colorless oil; <sup>1</sup>H NMR (300 MHz, CDCl<sub>3</sub>): δ 8.06 (d, *J* = 8.0 Hz, 2H), 7.71-7.61 (m, 5H), 7.52-7.47 (m, 2H), 4.95 (dd, *J* = 19.0, 5.2 Hz, 1H), 3.32 (s, 3H); <sup>13</sup>C NMR (101 MHz, CDCl<sub>3</sub>): δ 190.52 (dd, *J* = 31.7, 25.6 Hz), 137.12, 134.15, 133.23 (d, *J* = 3.1 Hz), 131.39 (q, *J* = 32.5 Hz), 130.05 (dd, *J* = 4.9, 1.9 Hz), 129.16, 128.56, 125.34 (q, *J* = 3.8 Hz), 124.00 (q, *J* = 273.2 Hz), 115.84 (dd, *J* = 266.7, 253.2 Hz), 81.54 (dd, *J* = 30.2, 22.1 Hz), 58.14; <sup>19</sup>F NMR (282 MHz, CDCl<sub>3</sub>): δ -62.73 (s, CF<sub>3</sub>), -103.28 (dd, *J* = 278.5, 5.0 Hz, 1F), -117.91 (dd, *J* = 278.2, 15.6 Hz, 1F); IR (ATR): 3032,

3001, 1751, 1653, 1598, 1579, 1450, 1323, 1278, 1001, 980, 879, 790; HRMS (ESI): Exact mass calcd for C<sub>17</sub>H<sub>13</sub>F<sub>5</sub>NaO<sub>2</sub> [M+Na]<sup>+</sup>: 367.0728, Found: 367.0716.



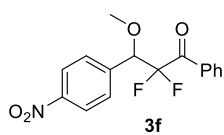

Column chromatography (PE/Et<sub>2</sub>O = 20:1, v/v) afforded product **3f** in 72% yield as white solid, Mp: 84-86°C; <sup>1</sup>H NMR (300 MHz, CDCl<sub>3</sub>): δ 8.31-8.28 (m, 2H), 8.06 (d, *J* = 7.9 Hz, 2H), 7.70-7.62 (m, 3H), 7.53-7.48 (m, 2H), 5.01 (dd, *J* = 18.7, 5.1 Hz, 1H), 3.34 (s, 3H); <sup>13</sup>C NMR (101 MHz, CDCl<sub>3</sub>): δ 190.12 (dd, *J* = 31.7, 25.6 Hz), 148.61, 140.41, 134.31, 133.03 (d, *J* = 2.9 Hz), 130.05 (dd, *J* = 5.0, 1.9 Hz), 129.68, 128.63, 123.51, 115.67 (dd, *J* = 267.4, 254.1 Hz), 81.23 (dd, *J* = 30.0, 22.2 Hz), 58.43; <sup>19</sup>F NMR (282 MHz, CDCl<sub>3</sub>): δ -102.91 (dd, *J* = 280.4, 3.4 Hz, 1F), -117.60 (dd, *J* = 280.4, 12.8 Hz, 1F); IR (ATR): 3030, 1708, 1598, 1448, 1213, 1168, 1112, 977, 1059, 979, 833, 775; HRMS (ESI): Exact mass calcd for C<sub>16</sub>H<sub>13</sub>F<sub>2</sub>NNaO<sub>4</sub> [M+Na]<sup>+</sup>: 344.0705, Found: 344.0701.

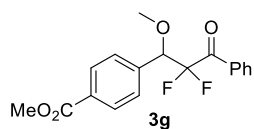

Column chromatography (PE/Et<sub>2</sub>O = 30:1, v/v) afforded product **3g** in 95% yield as white solid, Mp: 74 –76°C; <sup>1</sup>H NMR (300 MHz, CDCl<sub>3</sub>): δ 8.11-8.04 (m, 4H), 7.65-7.46 (m, 5H), 4.94 (dd, *J* = 19.0, 5.3 Hz, 1H), 3.94 (s, 3H), 3.31 (s, 3H); <sup>13</sup>C

NMR (101 MHz, CDCl<sub>3</sub>): δ 190.63 (dd, *J* = 31.7, 25.5 Hz), 166.70, 138.02, 134.09, 133.28 (d, *J* = 2.9 Hz), 131.01, 130.05 (dd, *J* = 5.0, 1.9 Hz), 129.59, 128.79, 128.53, 115.91 (dd, *J* = 266.7, 253.3 Hz), 81.74 (dd, *J* = 30.1, 22.2 Hz), 58.10, 52.20; <sup>19</sup>F NMR (282 MHz, CDCl<sub>3</sub>): δ -103.45 (dd, *J* = 277.0, 5.0 Hz, 1F), -117.72 (dd, *J* = 277.0, 15.9 Hz, 1F); IR (ATR): 3003, 1701, 1598, 1448, 1215, 1134, 1018, 854, 752; HRMS (ESI): Exact mass calcd for C<sub>18</sub>H<sub>16</sub>F<sub>2</sub>NaO<sub>4</sub> [M+Na]<sup>+</sup>: 357.0909, Found: 357.0905.

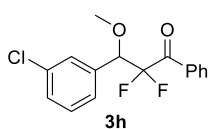

Column chromatography (PE/Et<sub>2</sub>O = 50:1, v/v) afforded product **3h** in 93% yield as colorless oil; <sup>1</sup>H NMR (600 MHz, CDCl<sub>3</sub>): δ 8.06 (d, *J* = 7.7 Hz, 2H), 7.64-7.62 (m, 1H), 7.51-7.48 (m, 3H), 7.39-7.36 (m, 3H), 4.85 (d, *J* = 19.2 Hz, 1H), 3.30 (s, 3H); <sup>13</sup>C

NMR (101 MHz, CDCl<sub>3</sub>): δ 190.70 (dd, *J* = 31.9, 25.4 Hz), 135.09, 134.52, 134.08, 133.32 (d, *J* = 3.0 Hz), 130.06 (dd, *J* = 5.0, 1.9 Hz), 129.65, 129.41, 128.79, 128.53, 127.03, 115.85 (dd, *J* = 266.7, 253.1 Hz), 81.51 (dd, *J* = 30.3, 22.0 Hz), 58.07; <sup>19</sup>F NMR (376 MHz, CDCl<sub>3</sub>): δ -103.36 (d, *J* = 276.9 Hz, 1F), -118.07 (d, *J* = 277.1 Hz, 1F); IR (ATR): 3030, 1751, 1598, 1475, 1431, 1190, 999, 896, 719; HRMS (ESI): Exact mass calcd for C<sub>16</sub>H<sub>13</sub>ClF<sub>2</sub>NaO<sub>2</sub> [M+Na]<sup>+</sup>: 333.0464, Found: 333.0461.

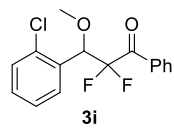

Column chromatography (PE/Et<sub>2</sub>O = 50:1, v/v) afforded product **3i** in 89% yield as colorless oil; <sup>1</sup>H NMR (600 MHz, CDCl<sub>3</sub>): δ 8.11 (d, *J* = 7.9 Hz, 2H), 7.68-7.63 (m, 2H), 7.52-7.50 (m, 2H), 7.45-7.44 (m, 1H), 7.39-7.34 (m, 2H), 5.55 (dd, *J* = 20.3, 3.3 Hz, 1H),

3.25 (s, 3H); <sup>13</sup>C NMR (101 MHz, CDCl<sub>3</sub>): δ 189.77 (dd, *J* = 31.1, 25.9 Hz), 135.32, 134.10, 133.10 (t,

$J = 1.8$  Hz), 131.02, 130.33, 130.16 (d,  $J = 2.3$  Hz), 130.03 (dd,  $J = 4.3, 2.3$  Hz), 129.60, 128.60, 127.02, 116.17 (dd,  $J = 266.1, 253.7$  Hz), 77.74 (dd,  $J = 30.8, 21.3$  Hz), 57.86;  $^{19}\text{F}$  NMR (376 MHz,  $\text{CDCl}_3$ ):  $\delta$  -103.63 (d,  $J = 278.8$  Hz, 1F), -118.46 (d,  $J = 278.7$  Hz, 1F); IR (ATR): 3030, 2856, 1598, 1473, 1284, 1188, 981, 700; HRMS (ESI): Exact mass calcd for  $\text{C}_{16}\text{H}_{13}\text{ClF}_2\text{NaO}_2$   $[\text{M}+\text{Na}]^+$ : 333.0464, Found: 333.0460.

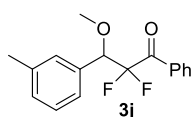

Column chromatography (PE/Et<sub>2</sub>O = 50:1, v/v) afforded product **3j** in 96% yield as colorless oil;  $^1\text{H}$  NMR (300 MHz,  $\text{CDCl}_3$ ):  $\delta$  8.06 (d,  $J = 7.8$  Hz, 2H), 7.65-7.59 (m, 1H), 7.51-7.46 (m, 2H), 7.34-7.27 (m, 3H), 7.23-7.21 (m, 1H), 4.84 (dd,  $J = 19.2, 5.6$  Hz, 1H), 3.29 (s, 3H), 2.40 (s, 3H);  $^{13}\text{C}$  NMR (101 MHz,  $\text{CDCl}_3$ ):  $\delta$  191.20 (dd,  $J = 31.8, 25.6$  Hz), 138.08, 133.90, 133.57 (d,  $J = 2.8$  Hz), 132.73, 130.07 (dd,  $J = 4.9, 2.1$  Hz), 130.02, 129.42, 128.46, 128.27, 125.94, 116.21 (dd,  $J = 265.7, 252.5$  Hz), 82.25 (dd,  $J = 30.2, 22.1$  Hz), 57.81, 21.43;  $^{19}\text{F}$  NMR (282 MHz,  $\text{CDCl}_3$ ):  $\delta$  -103.81 (dd,  $J = 273.2, 6.2$  Hz, 1F), -117.87 (dd,  $J = 273.3, 17.7$  Hz, 1F); IR (ATR): 3032, 1751, 1608, 1579, 1489, 1284, 1188, 1001, 746, 669; HRMS (ESI): Exact mass calcd for  $\text{C}_{17}\text{H}_{16}\text{F}_2\text{NaO}_2$   $[\text{M}+\text{Na}]^+$ : 313.1011, Found: 313.1004.

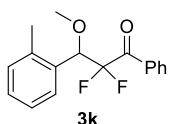

Column chromatography (PE/Et<sub>2</sub>O = 50:1, v/v) afforded product **3k** in 83% yield as colorless oil;  $^1\text{H}$  NMR (300 MHz,  $\text{CDCl}_3$ ):  $\delta$  8.08 (d,  $J = 7.7$  Hz, 2H), 7.65-7.57 (m, 2H), 7.49 (t,  $J = 7.8$  Hz, 2H), 7.33-7.28 (m, 2H), 7.25-7.22 (m, 1H), 5.23 (dd,  $J = 20.3, 3.7$  Hz, 1H), 3.24 (s, 3H), 2.45 (s, 3H);  $^{13}\text{C}$  NMR (101 MHz,  $\text{CDCl}_3$ ):  $\delta$  191.25 (dd,  $J = 32.3, 25.4$  Hz), 138.01, 133.89, 133.55 (d,  $J = 2.9$  Hz), 131.12, 130.55, 130.05 (dd,  $J = 5.0, 1.8$  Hz), 128.86, 128.54 (d,  $J = 1.8$  Hz), 128.46, 126.05, 116.80 (dd,  $J = 266.7, 251.4$  Hz), 78.11 (dd,  $J = 31.2, 21.9$  Hz), 57.51, 19.52 (d,  $J = 3.2$  Hz);  $^{19}\text{F}$  NMR (282 MHz,  $\text{CDCl}_3$ ):  $\delta$  -103.41 (dd,  $J = 275.2, 3.4$  Hz, 1F), -118.08 (dd,  $J = 275.6, 11.6$  Hz, 1F); IR (ATR): 3030, 2856, 1751, 1598, 1579, 1490, 1448, 1286, 1209, 977, 717; HRMS (ESI): Exact mass calcd for  $\text{C}_{17}\text{H}_{16}\text{F}_2\text{NaO}_2$   $[\text{M}+\text{Na}]^+$ : 313.1011, Found: 313.1009.

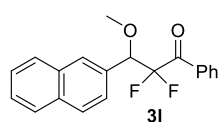

Column chromatography (PE/Et<sub>2</sub>O = 20:1, v/v) afforded product **3l** in 94% yield as white solid, Mp: 103-104°C.  $^1\text{H}$  NMR (300 MHz,  $\text{CDCl}_3$ ):  $\delta$  8.09 (d,  $J = 7.9$  Hz, 2H), 7.95 (s, 1H), 7.93-7.86 (m, 3H), 7.65-7.60 (m, 2H), 7.56-7.47 (m, 4H), 5.05 (dd,  $J = 19.2, 5.6$  Hz, 1H), 3.34 (s, 3H);  $^{13}\text{C}$  NMR (101 MHz,  $\text{CDCl}_3$ ):  $\delta$  191.12 (dd,  $J = 31.8, 25.6$  Hz), 133.96, 133.82, 133.52 (d,  $J = 2.8$  Hz), 133.01, 130.39, 130.09 (dd,  $J = 5.0, 2.0$  Hz), 128.83, 128.50, 128.21, 128.18, 127.77, 126.61, 126.34, 125.74, 116.30 (dd,  $J = 266.0, 252.5$  Hz), 82.37 (dd,  $J = 30.4,$

22.1 Hz), 57.91;  $^{19}\text{F}$  NMR (282 MHz,  $\text{CDCl}_3$ ):  $\delta$  -103.46 (dd,  $J$  = 274.7, 2.8 Hz, 1F), -117.60 (dd,  $J$  = 274.8, 10.6 Hz, 1F); IR (ATR): 3062, 2921, 1739, 1598, 1448, 1080, 896, 754; HRMS (ESI): Exact mass calcd for  $\text{C}_{20}\text{H}_{16}\text{F}_2\text{NaO}_2$   $[\text{M}+\text{Na}]^+$ : 349.1011, Found: 349.1001.

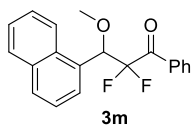

Column chromatography (PE/Et<sub>2</sub>O = 20:1, v/v) afforded product **3m** in 94% yield as white solid, Mp: 86-87°C;  $^1\text{H}$  NMR (300 MHz,  $\text{CDCl}_3$ ):  $\delta$  8.23 (d,  $J$  = 8.3 Hz, 1H), 8.10 (d,  $J$  = 8.0 Hz, 2H), 7.92 (d,  $J$  = 8.1 Hz, 2H), 7.80 (d,  $J$  = 7.2 Hz, 1H), 7.66-7.47

(m, 6H), 5.77 (dd,  $J$  = 20.1, 3.7 Hz, 1H), 3.31 (s, 3H);  $^{13}\text{C}$  NMR (101 MHz,  $\text{CDCl}_3$ ):  $\delta$  191.39 (dd,  $J$  = 32.4, 25.4 Hz), 133.98, 133.85, 133.62 (d,  $J$  = 3.0 Hz), 132.68, 130.12 (dd,  $J$  = 5.3, 1.7 Hz), 129.83, 128.87, 128.70, 128.53, 127.31, 126.54, 125.75, 125.24, 123.61, 116.80 (dd,  $J$  = 267.3, 252.6 Hz), 78.71 (dd,  $J$  = 30.3, 23.2 Hz), 57.88;  $^{19}\text{F}$  NMR (282 MHz,  $\text{CDCl}_3$ ):  $\delta$  -102.05 (dd,  $J$  = 275.3, 3.2 Hz, 1F), -117.77 (dd,  $J$  = 277.4, 16.5 Hz, 1F). IR (ATR): 3001, 1752, 1685, 1597, 1448, 1280, 1149, 1070, 948, 790; HRMS (ESI): Exact mass calcd for  $\text{C}_{20}\text{H}_{16}\text{F}_2\text{NaO}_2$   $[\text{M}+\text{Na}]^+$ : 349.1011, Found: 349.1006.

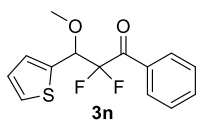

Column chromatography (PE/Et<sub>2</sub>O = 50:1, v/v) afforded product **3n** in 82% yield as colorless oil;  $^1\text{H}$  NMR (300 MHz,  $\text{CDCl}_3$ ):  $\delta$  8.06 (d,  $J$  = 8.1 Hz, 2H), 7.65-7.60 (m, 1H), 7.52-7.47 (m, 2H), 7.43 (dd,  $J$  = 5.0, 1.2 Hz, 1H), 7.21 (d,  $J$  = 3.4 Hz, 1H), 7.07

(dd,  $J$  = 5.1, 3.5 Hz, 1H), 5.17 (dd,  $J$  = 18.4, 5.6 Hz, 1H), 3.35 (s, 3H);  $^{13}\text{C}$  NMR (101 MHz,  $\text{CDCl}_3$ ):  $\delta$  190.70 (dd,  $J$  = 31.7, 25.8 Hz), 135.35, 134.10 (d,  $J$  = 2.1 Hz), 133.28 (d,  $J$  = 2.9 Hz), 130.06 (dd,  $J$  = 4.9, 2.0 Hz), 129.02 (d,  $J$  = 2.9 Hz), 128.55, 127.52 (d,  $J$  = 2.0 Hz), 126.79 (d,  $J$  = 1.9 Hz), 115.56 (dd,  $J$  = 266.6, 253.4 Hz), 78.43 (ddd,  $J$  = 30.7, 22.2, 2.2 Hz), 57.89;  $^{19}\text{F}$  NMR (282 MHz,  $\text{CDCl}_3$ ):  $\delta$  -103.92 (d,  $J$  = 274.8 Hz, 1F), -117.58 (d,  $J$  = 273.1 Hz, 1F); IR (ATR): 3030, 2856, 1699, 1599, 1579, 1448, 1307, 1280, 1199, 974, 846, 754; HRMS (ESI): Exact mass calcd for  $\text{C}_{14}\text{H}_{12}\text{F}_2\text{NaO}_2\text{S}$   $[\text{M}+\text{Na}]^+$ : 305.0418, Found: 305.0424.

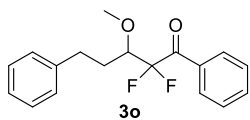

Column chromatography (PE/Et<sub>2</sub>O = 50:1, v/v) afforded product **3o** in 82% yield as colorless oil;  $^1\text{H}$  NMR (300 MHz,  $\text{CDCl}_3$ ):  $\delta$  8.08 (d,  $J$  = 7.5 Hz, 2H), 7.66-7.61 (m, 1H), 7.50 (t,  $J$  = 7.7 Hz, 2H), 7.34-7.20 (m, 5H), 3.91-3.79 (m, 1H), 3.45 (s,

3H), 2.98-2.89 (m, 1H), 2.81-2.71 (m, 1H), 2.09-2.00 (m, 2H);  $^{13}\text{C}$  NMR (101 MHz,  $\text{CDCl}_3$ ):  $\delta$  190.89 (dd,  $J$  = 30.3, 27.7 Hz), 141.12 (d,  $J$  = 2.5 Hz), 134.17 (d,  $J$  = 2.0 Hz), 133.28, 130.07 (d,  $J$  = 3.6 Hz), 128.62 (d,  $J$  = 2.4 Hz), 128.57 (d,  $J$  = 2.6 Hz), 128.47 (d,  $J$  = 2.7 Hz), 126.18 (d,  $J$  = 2.6 Hz), 118.05 (t,  $J$  = 262.0 Hz), 80.14 (ddd,  $J$  = 25.9, 23.0, 2.5 Hz), 60.38, 31.48, 30.27;  $^{19}\text{F}$  NMR (282 MHz,  $\text{CDCl}_3$ ):  $\delta$  -105.50 (dd,  $J$  = 276.6, 8.7 Hz), -108.53 (dd,  $J$  = 276.4, 8.7 Hz); IR (ATR): 3001, 2837, 1751, 1653, 1587,

1498, 1282, 1016, 781; HRMS (ESI): Exact mass calcd for C<sub>18</sub>H<sub>18</sub>F<sub>2</sub>NaO<sub>2</sub> [M+Na]<sup>+</sup>: 327.1167, Found: 327.1158.

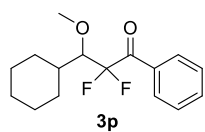

Column chromatography (PE/Et<sub>2</sub>O = 50:1, v/v) afforded product **3p** in 76% yield as colorless oil; <sup>1</sup>H NMR (300 MHz, CDCl<sub>3</sub>): δ 8.06 (d, *J* = 7.9 Hz, 2H), 7.61 (t, *J* = 7.4 Hz, 1H), 7.48 (t, *J* = 7.7 Hz, 2H), 3.65-3.54 (m, 1H), 3.37 (s, 3H), 1.96-1.59 (m, 6H), 1.30-1.14 (m, 5H); <sup>13</sup>C NMR (101 MHz, CDCl<sub>3</sub>): δ 191.62 (dd, *J* = 31.4, 26.9 Hz), 133.87, 133.49 (d, *J* = 2.3 Hz), 130.03 (dd, *J* = 4.4, 2.5 Hz), 128.48, 118.70 (dd, *J* = 263.5, 258.0 Hz), 84.65 (dd, *J* = 26.1, 22.1 Hz), 61.31, 38.61 (d, *J* = 1.8 Hz), 30.18 (t, *J* = 1.8 Hz), 27.88 (d, *J* = 1.5 Hz), 26.29, 26.24, 26.07; <sup>19</sup>F NMR (282 MHz, CDCl<sub>3</sub>): δ -102.75 (d, *J* = 273.7 Hz, 1F), -113.05 (d, *J* = 276.4 Hz, 1F); IR (ATR): 3064, 1751, 1598, 1579, 1448, 1278, 1182, 1041, 952, 846, 786; HRMS (ESI): Exact mass calcd for C<sub>16</sub>H<sub>20</sub>F<sub>2</sub>NaO<sub>2</sub> [M+Na]<sup>+</sup>: 305.1324, Found: 305.1321.

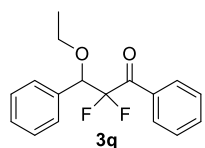

Column chromatography (PE/Et<sub>2</sub>O = 50:1, v/v) afforded product **3q** in 84% yield as colorless oil; <sup>1</sup>H NMR (300 MHz, CDCl<sub>3</sub>): δ 8.07 (d, *J* = 7.7 Hz, 2H), 7.65-7.59 (m, 1H), 7.51-7.46 (m, 4H), 7.44-7.40 (m, 3H), 4.96 (dd, *J* = 19.5, 5.6 Hz, 1H), 3.58-3.48 (m, 1H), 3.43-3.33 (m, 1H), 1.08 (t, *J* = 7.0 Hz, 3H); <sup>13</sup>C NMR (100 MHz, CDCl<sub>3</sub>): δ 191.58 (dd, *J* = 31.9, 25.3 Hz), 133.83, 133.76 (d, *J* = 2.7 Hz), 133.60, 130.09 (dd, *J* = 4.9, 1.9 Hz), 129.10, 128.71, 128.40, 128.33, 116.31 (dd, *J* = 265.6, 252.4 Hz), 80.47 (dd, *J* = 30.3, 22.2 Hz), 65.82, 14.89; <sup>19</sup>F NMR (282 MHz, CDCl<sub>3</sub>): δ -103.75 (dd, *J* = 269.9, 5.4 Hz, 1F), -118.12 (dd, *J* = 270.5, 15.7 Hz, 1F); IR (ATR): 3035, 1751, 1597, 1539, 1448, 1325, 823; HRMS (ESI): Exact mass calcd for C<sub>17</sub>H<sub>16</sub>F<sub>2</sub>NaO<sub>2</sub> [M+Na]<sup>+</sup>: 313.1011, Found: 313.1006

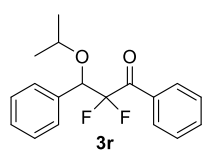

Column chromatography (PE/Et<sub>2</sub>O = 50:1, v/v) afforded product **3r** in 96% yield as colorless oil; <sup>1</sup>H NMR (400 MHz, CDCl<sub>3</sub>): δ 8.10 (d, *J* = 8.4 Hz, 2H), 7.64-7.59 (m, 1H), 7.55-7.44 (m, 4H), 7.43-7.40 (m, 3H), 5.05 (dd, *J* = 19.8, 5.4 Hz, 1H), 3.63-3.57 (m, 1H), 1.04 (d, *J* = 6.2 Hz, 3H), 0.98 (d, *J* = 6.0 Hz, 3H); <sup>13</sup>C NMR (126 MHz, CDCl<sub>3</sub>): δ 191.96 (dd, *J* = 32.0, 24.9 Hz), 134.29, 133.83 (d, *J* = 2.6 Hz), 133.71, 130.09 (dd, *J* = 4.9, 1.5 Hz), 128.92, 128.69, 128.28, 128.17, 116.41 (dd, *J* = 265.8, 252.3 Hz), 78.21 (dd, *J* = 30.5, 22.2 Hz), 71.42, 22.95, 20.65; <sup>19</sup>F NMR (376 MHz, CDCl<sub>3</sub>) δ -103.29 (d, *J* = 266.4 Hz, 1F), -118.24 (d, *J* = 266.4 Hz, 1F); IR (ATR): 1712, 1699, 1598, 1579, 1496, 1448, 1379, 1307, 1215, 1028, 1001, 837, 710; HRMS (ESI): Exact mass calcd for C<sub>18</sub>H<sub>18</sub>F<sub>2</sub>NaO<sub>2</sub> [M+Na]<sup>+</sup>: 327.1167, Found: 327.1170.

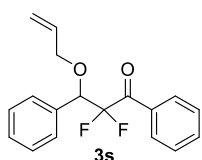

Run on a 0.5 mmol scale in this case, and column chromatography (PE/Et<sub>2</sub>O = 50:1, v/v) afforded product **3s** in 93% yield as colorless oil; <sup>1</sup>H NMR (400 MHz, CDCl<sub>3</sub>): δ 8.09 (d, *J* = 8.2 Hz, 2H), 7.62 (t, *J* = 7.4 Hz, 1H), 7.53-7.47 (m, 4H), 7.45-7.42 (m, 3H), 5.76-5.67 (m, 1H), 5.15-5.03 (m, 3H), 4.06 (dd, *J* = 12.6, 5.0 Hz, 1H), 3.84 (dd, *J* = 12.7, 6.2 Hz, 1H); <sup>13</sup>C NMR (126 MHz, CDCl<sub>3</sub>): δ 191.15 (dd, *J* = 31.6, 25.4 Hz), 133.84, 133.49 (d, *J* = 2.5 Hz), 133.21, 132.97, 130.00 (dd, *J* = 4.8, 1.8 Hz), 129.13, 128.77, 128.36, 128.31, 117.89, 116.23 (dd, *J* = 265.5, 252.4 Hz), 79.43 (dd, *J* = 30.5, 22.3 Hz), 70.46; <sup>19</sup>F NMR (376 MHz, CDCl<sub>3</sub>): δ -103.60 (d, *J* = 271.5 Hz, 1F), -117.39 (d, *J* = 271.5 Hz, 1F); IR (ATR): 3064, 1697, 1598, 1579, 1494, 1448, 1425, 1361, 1286, 1159, 1001, 842, 788, 761; HRMS (ESI): Exact mass calcd for C<sub>18</sub>H<sub>16</sub>F<sub>2</sub>NaO<sub>2</sub> [M+Na]<sup>+</sup>: 325.1011, Found: 325.1015

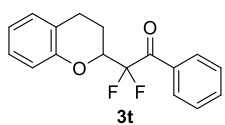

Column chromatography (PE/Et<sub>2</sub>O = 50:1, v/v) afforded product **3t** in 78% yield as colorless oil; <sup>1</sup>H NMR (300 MHz, CDCl<sub>3</sub>) δ 8.08 (d, *J* = 7.8 Hz, 2H), 7.62 (t, *J* = 7.5 Hz, 1H), 7.52-7.43 (m, 3H), 7.33-7.27 (m, 2H), 7.22-7.17 (m, 1H), 5.50 (dd, *J* = 20.2, 5.2 Hz, 1H), 4.17-4.10 (m, 1H), 3.76-3.68 (m, 1H), 3.00-2.90 (m, 1H), 2.76-2.68 (m, 1H). <sup>13</sup>C NMR (101 MHz, CDCl<sub>3</sub>) δ 190.46 (dd, *J* = 29.7, 25.7 Hz), 135.60, 133.92, 133.55, 129.97 (dd, *J* = 4.2, 2.7 Hz), 128.87, 128.82 (d, *J* = 1.9 Hz), 128.56, 128.00, 126.78 (d, *J* = 5.6 Hz), 126.43, 117.43 (dd, *J* = 265.4, 255.3 Hz), 75.25 (dd, *J* = 28.0, 24.9 Hz), 63.29, 28.79; <sup>19</sup>F NMR (282 MHz, CDCl<sub>3</sub>): δ -101.14 (dd, *J* = 264.4, 6.1 Hz, 1F), -115.18 (dd, *J* = 264.7, 17.9 Hz, 1F); IR (ATR): 3032, 1579, 1494, 1448, 1278, 1001, 979, 812, 680; HRMS (ESI): Exact mass calcd for C<sub>17</sub>H<sub>14</sub>F<sub>2</sub>NaO<sub>2</sub> [M+Na]<sup>+</sup>: 311.0854, Found: 311.0851

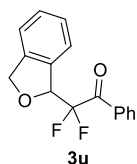

Column chromatography (PE/Et<sub>2</sub>O = 50:1, v/v) afforded product **3u** in 83% yield as colorless oil; <sup>1</sup>H NMR (400 MHz, CDCl<sub>3</sub>): δ 8.10 (d, *J* = 7.3 Hz, 2H), 7.66-7.60 (m, 1H), 7.51-7.46 (m, 3H), 7.41-7.32 (m, 2H), 7.28-7.25 (m, 1H), 5.87 (dd, *J* = 16.5, 6.2 Hz, 1H), 5.22-5.12 (m, 2H); <sup>13</sup>C NMR (101 MHz, CDCl<sub>3</sub>): δ 189.75 (dd, *J* = 30.5, 27.5 Hz), 140.33, 134.28, 133.72 (t, *J* = 2.0 Hz), 132.88 (t, *J* = 2.2 Hz), 130.15 (t, *J* = 3.4 Hz), 129.04, 128.61, 127.70, 123.48 (d, *J* = 2.4 Hz), 120.99, 116.69 (dd, *J* = 262.2, 257.1 Hz), 82.75 (dd, *J* = 29.6, 26.2 Hz), 74.52; <sup>19</sup>F NMR (282 MHz, CDCl<sub>3</sub>): δ -107.19 (d, *J* = 283.5 Hz, 1F), -115.04 (d, *J* = 283.7 Hz, 1F); IR (ATR): 3005, 1751, 1598, 1448, 1381, 1219, 1174, 977, 903, 846, 775; HRMS (ESI): Exact mass calcd for C<sub>16</sub>H<sub>12</sub>F<sub>2</sub>NaO<sub>2</sub> [M+Na]<sup>+</sup>: 297.0698, Found: 297.0690.

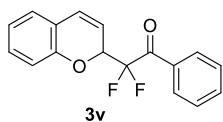

Run on a 0.5 mmol scale in this case, and column chromatography (PE/Et<sub>2</sub>O = 50:1, v/v) afforded product **3v** in 93% yield as colorless oil; <sup>1</sup>H NMR (400 MHz, CDCl<sub>3</sub>) δ 7.98 (d, *J* = 8.1 Hz, 2H), 7.66-7.55 (m, 1H), 7.43 (t, *J* = 7.9 Hz, 2H), 7.28-7.21 (m, 2H), 7.08-7.04 (m, 1H), 6.98 (d, *J* = 7.8 Hz, 1H), 6.75 (d, *J* = 6.1 Hz, 1H), 5.04 (t, *J* = 5.5 Hz, 1H), 4.46-4.38 (m, 1H); <sup>13</sup>C NMR (126 MHz, CDCl<sub>3</sub>): δ 189.94 (t, *J* = 30.6 Hz), 152.48, 144.36, 134.17, 132.74 (t, *J* = 2.4 Hz), 130.56 (d, *J* = 2.2 Hz), 130.04 (t, *J* = 3.5 Hz), 129.03, 128.51, 123.53, 117.55 (dd, *J* = 260.2, 259.1 Hz), 116.73, 115.23 (t, *J* = 2.7 Hz), 96.66 (dd, *J* = 5.9, 3.5 Hz), 38.99 (t, *J* = 23.8 Hz); <sup>19</sup>F NMR (376 MHz, CDCl<sub>3</sub>): δ -101.29 (d, *J* = 277.6 Hz, 1F), -106.64 (d, *J* = 277.9 Hz, 1F); IR (ATR): 1701, 1597, 1581, 1487, 1458, 1307, 1271, 1178, 1153, 1001, 817, 665; HRMS (ESI): Exact mass calcd for C<sub>17</sub>H<sub>12</sub>F<sub>2</sub>NaO<sub>2</sub> [M+Na]<sup>+</sup>: 309.0698, Found: 309.0692.

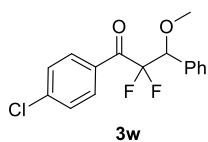

Run on a 0.5 mmol scale in this case, and column chromatography (PE/Et<sub>2</sub>O = 50:1, v/v) afforded product **3w** in 82% yield as colorless oil; <sup>1</sup>H NMR (400 MHz, CDCl<sub>3</sub>): δ 8.00 (dd, *J* = 8.7, 1.5 Hz, 2H), 7.49-7.41 (m, 7H), 4.84 (dd, *J* = 18.9, 5.7 Hz, 1H), 3.30 (s, 3H); <sup>13</sup>C NMR (126 MHz, CDCl<sub>3</sub>): δ 190.17 (dd, *J* = 32.1, 25.8 Hz), 140.61, 132.55, 131.76 (d, *J* = 3.2 Hz), 131.52 (d, *J* = 2.0 Hz), 129.28, 128.82, 128.71, 128.40, 116.10 (dd, *J* = 265.2, 252.6 Hz), 82.13 (dd, *J* = 30.2, 22.3 Hz), 57.78; <sup>19</sup>F NMR (376 MHz, CDCl<sub>3</sub>): δ -103.91 (d, *J* = 273.3 Hz, 1F), -117.54 (d, *J* = 273.3 Hz, 1F); IR (ATR): 2831, 1699, 1587, 1558, 1489, 1456, 1361, 1309, 1274, 1029, 956, 659; HRMS (ESI): Exact mass calcd for C<sub>16</sub>H<sub>13</sub>ClF<sub>2</sub>NaO<sub>2</sub> [M+Na]<sup>+</sup>: 333.0464, Found: 333.0472.

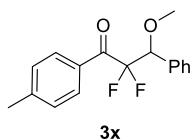

Column chromatography (PE/Et<sub>2</sub>O = 50:1, v/v) afforded product **3x** in 74% yield as colorless oil; <sup>1</sup>H NMR (300 MHz, CDCl<sub>3</sub>): δ 7.96 (d, *J* = 7.9 Hz, 2H), 7.50-7.45 (m, 2H), 7.43-7.40 (m, 3H), 7.29 (s, 2H), 4.86 (dd, *J* = 18.9, 5.8 Hz, 1H), 3.29 (s, 3H), 2.43 (s, 3H); <sup>13</sup>C NMR (101 MHz, CDCl<sub>3</sub>): δ 190.47 (dd, *J* = 31.2, 25.7 Hz), 145.07, 132.97, 130.91 (d, *J* = 2.8 Hz), 130.25 (dd, *J* = 5.0, 2.1 Hz), 129.21, 129.16, 128.81, 128.36, 116.24 (dd, *J* = 265.7, 252.7 Hz), 82.21 (dd, *J* = 30.1, 22.2 Hz), 57.83, 21.78; <sup>19</sup>F NMR (282 MHz, CDCl<sub>3</sub>): δ -104.03 (dd, *J* = 274.0, 5.1 Hz, 1F), -117.58 (dd, *J* = 273.9, 16.8 Hz, 1F); IR (ATR): 3035, 1751, 1699, 1606, 1494, 1276, 1219, 1188, 1066, 979, 806, 781; HRMS (ESI): Exact mass calcd for C<sub>17</sub>H<sub>16</sub>F<sub>2</sub>NaO<sub>2</sub> [M+Na]<sup>+</sup>: 313.1011, Found: 313.1007.

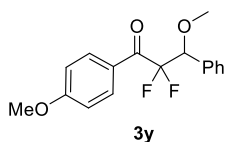

Column chromatography (PE/Et<sub>2</sub>O = 50:1, v/v) afforded product **3y** in 68% yield as colorless oil; <sup>1</sup>H NMR (400 MHz, CDCl<sub>3</sub>): δ 8.07 (dd, *J* = 8.8, 1.4 Hz, 2H), 7.49-7.47 (m, 2H), 7.43-7.40 (m, 3H), 6.96-6.93 (m, 2H), 4.86 (dd, *J* = 18.8, 5.8 Hz, 1H), 3.89

(s, 3H), 3.30 (s, 3H); <sup>13</sup>C NMR (101 MHz, CDCl<sub>3</sub>): δ 189.01 (dd, *J* = 30.8, 25.8 Hz), 164.24, 133.08, 132.71 (dd, *J* = 5.4, 2.3 Hz), 129.09, 128.79, 128.31, 126.30 (d, *J* = 2.8 Hz), 116.42 (dd, *J* = 265.5, 252.9 Hz), 113.77, 82.21 (dd, *J* = 29.9, 22.2 Hz), 57.82, 55.49; <sup>19</sup>F NMR (376 MHz, CDCl<sub>3</sub>): δ -103.96 (d, *J* = 273.6 Hz, 1F), -116.88 (d, *J* = 273.6 Hz, 1F); IR (ATR): 2831, 1712, 1685, 1573, 1494, 1442, 1361, 1290, 1219, 1066, 952, 765, 669; HRMS (ESI): Exact mass calcd for C<sub>17</sub>H<sub>16</sub>F<sub>2</sub>NaO<sub>3</sub> [M+Na]<sup>+</sup>: 329.0960, Found: 329.0964.

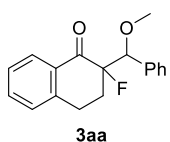

Run on a 0.5 mmol scale in this case, and column chromatography (PE/Et<sub>2</sub>O = 50:1, v/v)

afforded product **3aa** in 83% yield as colorless oil; <sup>1</sup>H, <sup>19</sup>F NMR analysis of crude mixture revealed that the dr value was 1.1:1. <sup>1</sup>H NMR for the major diastereomer (300 MHz, CDCl<sub>3</sub>): δ 8.04 (dd, *J* = 7.9, 1.4 Hz, 1H), 7.53-7.44 (m, 3H), 7.38-7.31 (m, 4H), 7.23 (d, *J* = 7.7 Hz, 1H), 4.75 (d, *J* = 19.1 Hz, 1H), 3.19 (s, 3H), 3.09 (dd, *J* = 7.7, 5.4 Hz, 2H), 2.48-2.34 (m, 1H), 2.14-2.00 (m, 1H); <sup>13</sup>C NMR for the major diastereomer (101 MHz, CDCl<sub>3</sub>): δ 192.54 (d, *J* = 18.0 Hz), 142.21, 135.11 (d, *J* = 2.9 Hz), 133.91, 131.68 (d, *J* = 1.0 Hz), 128.85 (d, *J* = 1.7 Hz), 128.63 (d, *J* = 2.3 Hz), 128.32, 128.27 (d, *J* = 1.5 Hz), 127.10, 96.14 (d, *J* = 191.5 Hz), 82.82 (d, *J* = 20.2 Hz), 57.64, 29.44 (d, *J* = 21.8 Hz), 25.72 (d, *J* = 9.3 Hz); <sup>19</sup>F NMR for the major diastereomer (282 MHz, CDCl<sub>3</sub>): δ -169.33 (s, 1F); IR (ATR): 2937, 1708, 1685, 1602, 1490, 1438, 1309, 1300, 1222, 1091, 983, 916, 769; HRMS (ESI): Exact mass calcd for C<sub>18</sub>H<sub>17</sub>FNaO<sub>2</sub> [M+Na]<sup>+</sup>: 307.1105, Found: 307.1107. <sup>1</sup>H NMR for the minor diastereomer (400 MHz, CDCl<sub>3</sub>): δ 8.10 (d, *J* = 7.8 Hz, 1H), 7.53-7.50 (m, 1H), 7.41-7.34 (m, 6H), 7.25 (d, *J* = 6.4 Hz, 1H), 4.98 (d, *J* = 10.5 Hz, 1H), 3.26 (s, 3H), 3.04-2.99 (m, 2H), 2.47-2.33 (m, 1H), 2.10-2.00 (m, 1H); <sup>13</sup>C NMR for the minor diastereomer (101 MHz, CDCl<sub>3</sub>): δ 192.67 (d, *J* = 17.3 Hz), 143.97, 135.79, 133.95, 131.89, 128.58, 128.24, 128.17, 128.05, 128.03, 126.92, 93.21 (d, *J* = 181.5 Hz), 82.60 (d, *J* = 28.6 Hz), 57.92, 28.00 (d, *J* = 21.8 Hz), 24.68 (d, *J* = 7.0 Hz); <sup>19</sup>F NMR for the minor diastereomer (376 MHz, CDCl<sub>3</sub>): δ -161.59 (s, 1F); IR (ATR): 3032, 1693, 1600, 1494, 1454, 1307, 1282, 1219, 1190, 941, 877, 740; HRMS (ESI): Exact mass calcd for C<sub>18</sub>H<sub>17</sub>FNaO<sub>2</sub> [M+Na]<sup>+</sup>: 307.1105, Found: 307.1122.

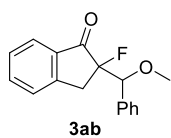

Run on a 0.5 mmol scale in this case, and column chromatography (PE/Et<sub>2</sub>O = 50:1, v/v) afforded product **3ab** in 96% yield as colorless oil; <sup>1</sup>H, <sup>19</sup>F NMR analysis of crude mixture revealed that the dr value was 1.1:1. <sup>1</sup>H NMR for the major diastereomer (400 MHz, CDCl<sub>3</sub>): δ 7.85 (d, *J* = 7.7 Hz, 1H), 7.61 (t, *J* = 7.4 Hz, 1H), 7.50-7.48 (m, 2H), 7.45-7.38 (m, 5H), 4.89 (d, *J* = 6.7 Hz, 1H), 3.63 (t, *J* = 17.9 Hz, 1H), 3.24 (s, 3H), 2.80 (dd, *J* = 25.9, 18.0 Hz, 1H); <sup>13</sup>C NMR for the major diastereomer (126 MHz, CDCl<sub>3</sub>): δ 200.47 (d, *J* = 16.9 Hz), 151.80 (d, *J* = 2.2 Hz), 136.10, 135.95, 134.59, 128.32, 128.20, 127.76, 127.46 (d, *J* = 1.9 Hz), 126.47, 124.65, 95.46 (d, *J* = 186.0 Hz), 81.24 (d, *J* = 30.1 Hz), 57.45, 33.77 (d, *J* = 23.7 Hz); <sup>19</sup>F NMR for the major diastereomer (376 MHz, CDCl<sub>3</sub>): δ -156.88 (s, 1F); IR (ATR): 1724, 1606, 1587, 1465, 1454, 1307, 1288, 1207, 1161, 1101, 975, 902, 835, 636; HRMS (ESI): Exact mass calcd for C<sub>17</sub>H<sub>15</sub>FNaO<sub>2</sub> [M+Na]<sup>+</sup>: 293.0948, Found: 293.0955. <sup>1</sup>H NMR for the minor diastereomer (400 MHz, CDCl<sub>3</sub>): δ 7.54 (d, *J* = 7.9 Hz, 1H), 7.46 (td, *J* = 7.5, 1.3 Hz, 1H), 7.28-7.25 (m, 3H), 7.21 (t, *J* = 7.5 Hz, 1H), 7.17-7.08 (m, 3H), 4.81 (d, *J* = 12.9 Hz, 1H), 3.78 (dd, *J* = 18.0, 10.5 Hz, 1H), 3.42 (s, 3H), 3.29-3.18 (m, 1H); <sup>13</sup>C NMR for the minor diastereomer (126 MHz, CDCl<sub>3</sub>): δ 199.93 (d, *J* = 17.6 Hz), 151.05 (d, *J* = 4.6 Hz), 135.93, 134.58 (d, *J* = 1.3 Hz), 134.33 (d, *J* = 8.1 Hz), 128.41, 128.21, 127.81, 127.71, 126.07 (d, *J* = 1.8 Hz), 124.50, 99.55 (d, *J* = 194.6 Hz), 83.99 (d, *J* = 24.2 Hz), 57.95, 34.05 (d, *J* = 24.4 Hz); <sup>19</sup>F NMR for the minor diastereomer (376 MHz, CDCl<sub>3</sub>): δ -158.32 (s, 1F); IR (ATR): 1722, 1608, 1454, 1203, 1134, 1105, 1074, 1047, 912, 767, 702; HRMS (ESI): Exact mass calcd for C<sub>17</sub>H<sub>15</sub>FNaO<sub>2</sub> [M+Na]<sup>+</sup>: 293.0948, Found: 293.0948.

## 2) Procedure for the catalytic aldol-type reaction with ketals **4**

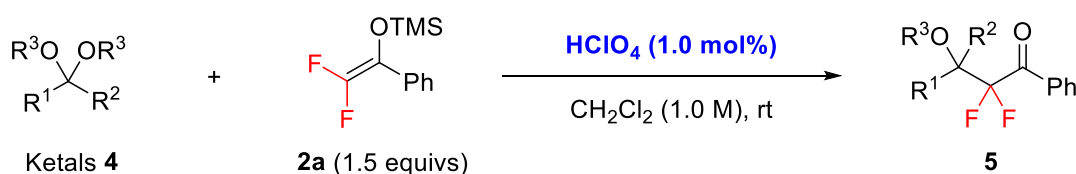

**General procedure:** To a stirred mixture of ketals **4** (1.0 mmol, 1.0 equiv) and difluoroenoxy silanes **2a** (1.5 mmol, 1.5 equivs) in anhydrous CH<sub>2</sub>Cl<sub>2</sub> (1.0 mL) in 5 mL vial was added HClO<sub>4</sub> (1.4 mg, 1.0 mol%, 70% wt., aq.) at room temperature under air conditions. The resulting mixture was then stirred at room temperature. After full conversion of ketals **4** by TLC analysis, the reaction was directly purified by flash column chromatography on silica gel to afford the desired products **5** using the mixture solvent of PE and Et<sub>2</sub>O as eluents.



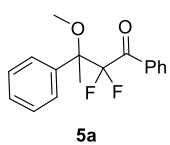

Column chromatography (PE/Et<sub>2</sub>O = 50:1, v/v) afforded product **5a** in 94% yield as white solid, Mp: 63-65°C; <sup>1</sup>H NMR (300 MHz, CDCl<sub>3</sub>): δ 8.04 (d, *J* = 7.9 Hz, 2H), 7.59-7.53 (m, 1H), 7.48-7.35 (m, 7H), 3.19 (s, 3H), 1.85 (s, 3H); <sup>13</sup>C NMR (101 MHz, CDCl<sub>3</sub>): δ 191.34 (dd, *J* = 30.4, 26.9 Hz), 136.69, 134.57 (d, *J* = 2.1 Hz), 133.47, 130.78 (dd, *J* = 4.4, 2.8 Hz), 128.48, 128.28, 128.10, 128.05, 117.71 (dd, *J* = 262.0, 259.8 Hz), 81.48 (dd, *J* = 26.9, 24.3 Hz), 50.43, 17.58 (t, *J* = 3.4 Hz); <sup>19</sup>F NMR (282 MHz, CDCl<sub>3</sub>): δ -107.84 (d, *J* = 252.8 Hz, 1F), -109.43 (d, *J* = 253.0 Hz, 1F); IR (ATR): 3007, 1739, 1687, 1595, 1446, 1379, 1278, 1217, 1143, 1047, 972, 883, 781, 696; HRMS (ESI): Exact mass calcd for C<sub>17</sub>H<sub>16</sub>F<sub>2</sub>NaO<sub>2</sub> [M+Na]<sup>+</sup>: 313.1011, Found: 313.1007.

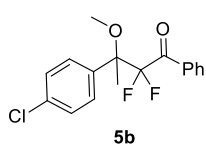

Column chromatography (PE/Et<sub>2</sub>O = 50:1, v/v) afforded product **5b** in 88% yield as white solid, Mp: 90-92°C; <sup>1</sup>H NMR (300 MHz, CDCl<sub>3</sub>): δ 8.05 (d, *J* = 7.6 Hz, 2H), 7.61-7.55 (m, 1H), 7.46-7.34 (m, 6H), 3.17 (s, 3H), 1.82 (s, 3H); <sup>13</sup>C NMR (101 MHz, CDCl<sub>3</sub>): δ 191.06 (dd, *J* = 30.1, 26.9 Hz), 135.34, 134.65, 134.42 (d, *J* = 2.0 Hz), 133.61, 130.75 (dd, *J* = 4.4, 2.9 Hz), 129.68, 128.31, 128.11, 117.42 (dd, *J* = 262.0, 260.4 Hz), 81.18 (dd, *J* = 27.1, 24.4 Hz), 50.46, 17.56; <sup>19</sup>F NMR (282 MHz, CDCl<sub>3</sub>): δ -107.86 (d, *J* = 254.0 Hz, 1F), -109.42 (d, *J* = 254.0 Hz, 1F); IR (ATR): 3005, 2970, 1751, 1693, 1597, 1504, 1487, 1446, 1367, 1276, 1217, 1103, 1070, 970, 846, 748, 700; HRMS (ESI): Exact mass calcd for C<sub>17</sub>H<sub>15</sub>ClF<sub>2</sub>NaO<sub>2</sub> [M+Na]<sup>+</sup>: 347.0621, Found: 347.0617.

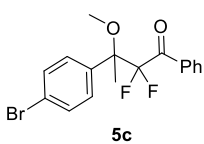

Column chromatography (PE/Et<sub>2</sub>O = 50:1, v/v) afforded product **5c** in 80% yield as white solid, Mp: 96-98°C; <sup>1</sup>H NMR (300 MHz, CDCl<sub>3</sub>): δ 8.05 (d, *J* = 7.8 Hz, 2H), 7.61-7.58 (m, 1H), 7.57-7.49 (m, 2H), 7.44 (t, *J* = 7.7 Hz, 2H), 7.33 (d, *J* = 8.4 Hz, 2H), 3.17 (s, 3H), 1.82 (s, 3H); <sup>13</sup>C NMR (101 MHz, CDCl<sub>3</sub>): δ 191.03 (dd, *J* = 30.2, 27.0 Hz), 135.89, 134.41 (d, *J* = 2.0 Hz), 133.61, 131.28, 130.75 (dd, *J* = 4.3, 2.9 Hz), 130.00, 128.11, 122.94, 117.35 (dd, *J* = 262.0, 260.4 Hz), 81.24 (dd, *J* = 27.0, 24.4 Hz), 50.48, 17.51 (t, *J* = 3.6 Hz); <sup>19</sup>F NMR (282 MHz, CDCl<sub>3</sub>): δ -107.87 (d, *J* = 254.0 Hz, 1F), -109.42 (d, *J* = 254.2 Hz, 1F); IR (ATR): 3014, 1693, 1633, 1558, 1446, 1278, 1037, 902, 680, 744, 669; HRMS (ESI): Exact mass calcd for C<sub>17</sub>H<sub>15</sub>BrF<sub>2</sub>NaO<sub>2</sub> [M+Na]<sup>+</sup>: 391.0116, Found: 391.0108.

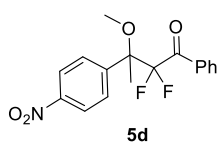

Column chromatography (PE/Et<sub>2</sub>O = 20:1, v/v) afforded product **5d** in 77% yield as white solid, Mp: 80-82°C; <sup>1</sup>H NMR (300 MHz, CDCl<sub>3</sub>) δ 8.26-8.23 (m, 2H), 8.07 (d, *J* = 7.7 Hz, 2H), 7.65 (d, *J* = 8.8 Hz, 2H), 7.59 (d, *J* = 7.4 Hz, 1H), 7.46 (t, *J* = 7.7 Hz, 2H), 3.22 (s, 3H), 1.89 (s, 3H); <sup>13</sup>C NMR (101 MHz, CDCl<sub>3</sub>): δ 190.58 (dd, *J* = 28.9, 27.8 Hz), 147.99, 144.37, 134.19, 133.87, 130.72 (t, *J* = 3.6 Hz), 129.25 (d, *J* = 1.5 Hz), 128.24, 123.16, 117.11 (t, *J* = 262.3 Hz), 81.39 (dd, *J* = 26.7, 25.0 Hz), 50.84, 17.62 (t, *J* = 3.4 Hz); <sup>19</sup>F NMR (282 MHz, CDCl<sub>3</sub>): δ -107.78 (d, *J* = 255.8 Hz, 1F), -108.88 (d, *J* = 255.5 Hz, 1F); IR (ATR): 3361, 1691, 1516, 1350, 1280, 1151, 1074, 941, 746, 696; HRMS (ESI): Exact mass calcd for C<sub>17</sub>H<sub>15</sub>F<sub>2</sub>NNaO<sub>4</sub> [M+Na]<sup>+</sup>: 358.0861, Found: 358.0860.

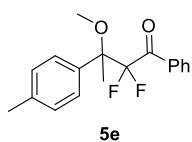

Column chromatography (PE/Et<sub>2</sub>O = 50:1, v/v) afforded product **5e** in 74% yield as white solid, Mp: 65-67°C; <sup>1</sup>H NMR (300 MHz, CDCl<sub>3</sub>) δ 8.05 (d, *J* = 7.8 Hz, 2H), 7.56 (t, *J* = 7.5 Hz, 1H), 7.42 (t, *J* = 7.7 Hz, 2H), 7.34 (d, *J* = 8.0 Hz, 2H), 7.20 (d, *J* = 8.0 Hz, 2H), 3.17 (s, 3H), 2.37 (s, 3H), 1.83 (s, 3H); <sup>13</sup>C NMR (101 MHz, CDCl<sub>3</sub>): δ 191.45 (dd, *J* = 30.4, 27.0 Hz), 138.29, 134.59 (d, *J* = 1.9 Hz), 133.59, 133.40, 130.81 (dd, *J* = 4.3, 2.8 Hz), 128.83, 128.19, 128.00, 117.73 (dd, *J* = 261.5, 259.9 Hz), 81.38 (dd, *J* = 26.7, 24.4 Hz), 50.30, 21.09, 17.55 (t, *J* = 3.4 Hz); <sup>19</sup>F NMR (282 MHz, CDCl<sub>3</sub>): δ -107.91 (d, *J* = 252.4 Hz, 1F), -109.46 (d, *J* = 252.3 Hz, 1F); IR (ATR): 2970, 1689, 1597, 1579, 1274, 1141, 1105, 1074, 977, 839, 756, 705; HRMS (ESI): Exact mass calcd for C<sub>18</sub>H<sub>18</sub>F<sub>2</sub>NaO<sub>2</sub> [M+Na]<sup>+</sup>: 327.1167, Found: 327.1165.

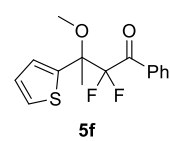

Column chromatography (PE/Et<sub>2</sub>O = 50:1, v/v) afforded product **5f** in 81% yield as white solid, Mp: 44-46 °C; <sup>1</sup>H NMR (300 MHz, CDCl<sub>3</sub>): δ 8.05 (d, *J* = 7.8 Hz, 2H), 7.60-7.54 (m, 1H), 7.43 (t, *J* = 7.6 Hz, 2H), 7.38-7.36 (m, 1H), 7.10 (d, *J* = 3.6 Hz, 1H), 7.03 (dd, *J* = 5.0, 3.6 Hz, 1H), 3.25 (s, 3H), 1.87 (s, 3H); <sup>13</sup>C NMR (101 MHz, CDCl<sub>3</sub>): δ 191.04 (dd, *J* = 30.9, 26.4 Hz), 140.92, 134.42, 133.61, 133.59, 130.71 (dd, *J* = 4.8, 2.6 Hz), 128.12, 127.97, 126.85, 117.11 (t, *J* = 261.9 Hz), 80.48 (dd, *J* = 27.9, 24.1 Hz), 50.86, 18.44 (t, *J* = 3.3 Hz); <sup>19</sup>F NMR (282 MHz, CDCl<sub>3</sub>): δ -107.29 (d, *J* = 252.6 Hz, 1F), -109.21 (d, *J* = 252.7 Hz, 1F); IR (ATR): 3105, 1695, 1595, 1448, 1381, 1274, 1190, 1045, 937, 800, 754; HRMS (ESI): Exact mass calcd for C<sub>15</sub>H<sub>14</sub>F<sub>2</sub>NaO<sub>2</sub>S [M+Na]<sup>+</sup>: 319.0575, Found: 319.0589.

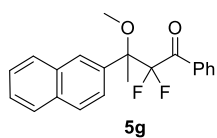

Column chromatography (PE/Et<sub>2</sub>O = 50:1, v/v) afforded product **5g** in 98% yield as white solid, Mp: 125-127°C; <sup>1</sup>H NMR (300 MHz, CDCl<sub>3</sub>): δ 8.08 (d, *J* = 7.9 Hz, 2H), 7.92 (s, 1H), 7.87-7.85 (m, 3H), 7.63-7.58 (m, 1H), 7.55-7.48 (m, 3H), 7.44-7.39 (m,

2H), 3.23 (s, 3H), 1.96 (s, 3H); <sup>13</sup>C NMR (101 MHz, CDCl<sub>3</sub>): δ 191.38 (dd, *J* = 30.7, 26.7 Hz), 134.59 (d, *J* = 2.1 Hz), 134.33, 133.49, 133.18, 132.96, 130.80 (dd, *J* = 4.6, 2.6 Hz), 128.44, 128.14, 128.05, 127.62, 127.51, 126.57, 126.16, 125.67, 117.83 (dd, *J* = 261.7, 261.6 Hz), 81.65 (dd, *J* = 27.1, 24.1 Hz), 50.58, 17.84 (t, *J* = 3.4 Hz); <sup>19</sup>F NMR (282 MHz, CDCl<sub>3</sub>): δ -107.31 (d, *J* = 253.6 Hz, 1F), -109.27 (d, *J* = 253.8 Hz, 1F); IR (ATR): 3037, 2960, 1739, 1695, 1558, 1436, 1228, 1035, 813, 756; HRMS (ESI): Exact mass calcd for C<sub>21</sub>H<sub>18</sub>F<sub>2</sub>NaO<sub>2</sub> [M+Na]<sup>+</sup>: 363.1167, Found: 363.1161.

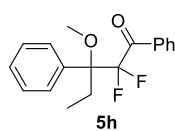

Column chromatography (PE/Et<sub>2</sub>O = 50:1, v/v) afforded product **5h** in 90% yield as colorless oil; <sup>1</sup>H NMR (300 MHz, CDCl<sub>3</sub>): δ 7.63 (d, *J* = 7.5 Hz, 2H), 7.47-7.37 (m, 3H), 7.28-7.21 (m, 5H), 3.44 (s, 3H), 2.66-2.54 (m, 1H), 2.32-2.20 (m, 1H), 0.90 (t, *J* = 7.4

Hz, 3H); <sup>13</sup>C NMR (101 MHz, CDCl<sub>3</sub>): δ 190.55 (t, *J* = 27.8 Hz), 136.86 (d, *J* = 3.6 Hz), 134.46, 133.14, 130.04 (t, *J* = 3.7 Hz), 128.11, 128.08, 127.96, 127.88, 119.18 (dd, *J* = 267.2, 264.7 Hz), 82.92 (t, *J* = 23.3 Hz), 51.66 (d, *J* = 2.6 Hz), 21.78 (t, *J* = 2.1 Hz), 7.50 (d, *J* = 2.2 Hz); <sup>19</sup>F NMR (282 MHz, CDCl<sub>3</sub>): δ -103.50 (d, *J* = 254.6 Hz, 1F), -107.16 (d, *J* = 254.7 Hz, 1F); IR (ATR): 3030, 1751, 1579, 1496, 1219, 1045, 789; HRMS (ESI): Exact mass calcd for C<sub>18</sub>H<sub>18</sub>F<sub>2</sub>NaO<sub>2</sub> [M+Na]<sup>+</sup>: 327.1167, Found: 327.1166.

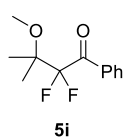

Column chromatography (PE/Et<sub>2</sub>O = 70:1, v/v) afforded product **5i** in 68% yield as colorless oil; <sup>1</sup>H NMR (400 MHz, CDCl<sub>3</sub>): δ 8.08 (d, *J* = 7.5 Hz, 2H), 7.57 (t, *J* = 7.4 Hz, 1H), 7.45 (t, *J* = 7.8 Hz, 2H), 3.22 (s, 3H), 1.40 (t, *J* = 1.6 Hz, 6H); <sup>13</sup>C NMR (101 MHz, CDCl<sub>3</sub>): δ 192.06

(t, *J* = 28.8 Hz), 134.66, 133.46, 130.63 (t, *J* = 3.7 Hz), 128.09, 118.82 (t, *J* = 260.2 Hz), 77.83 (t, *J* = 25.4 Hz), 49.80, 18.83 (t, *J* = 3.3 Hz); <sup>19</sup>F NMR (376 MHz, CDCl<sub>3</sub>): δ -110.81 (s, 2F); IR (ATR): 2991, 1751, 1653, 1598, 1579, 1448, 1369, 1280, 1174, 977, 806, 738; HRMS (ESI): Exact mass calcd for C<sub>12</sub>H<sub>14</sub>F<sub>2</sub>NaO<sub>2</sub> [M+Na]<sup>+</sup>: 251.0854, Found: 251.0856.

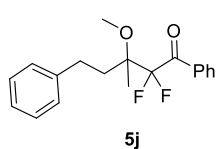

Column chromatography (PE/Et<sub>2</sub>O = 50:1, v/v) afforded product **5j** in 93% yield as colorless oil; <sup>1</sup>H NMR (300 MHz, CDCl<sub>3</sub>): δ 8.09 (d, *J* = 7.9 Hz, 2H), 7.59 (t, *J* = 7.4 Hz, 1H), 7.46 (t, *J* = 7.7 Hz, 2H), 7.32-7.17 (m, 5H), 3.29 (s, 3H), 2.82-2.66 (m, 2H),

2.12-1.97 (m, 2H), 1.47 (s, 3H); <sup>13</sup>C NMR (101 MHz, CDCl<sub>3</sub>): δ 191.73 (dd, *J* = 29.9, 27.8 Hz), 142.06, 134.65, 133.63, 130.51 (t, *J* = 3.8 Hz), 128.51, 128.36, 128.28, 126.00, 119.67 (dd, *J* = 263.2, 262.0 Hz),

79.22 (t,  $J = 24.0$  Hz), 51.07, 35.87, 29.79, 16.75 (t,  $J = 3.5$  Hz);  $^{19}\text{F}$  NMR (282 MHz,  $\text{CDCl}_3$ ):  $\delta$  -106.66 (d,  $J = 260.3$  Hz, 1F), -109.54 (d,  $J = 260.2$  Hz, 1F); IR (ATR): 3028, 1751, 1695, 1598, 1496, 1219, 1080, 977, 850, 746; HRMS (ESI): Exact mass calcd for  $\text{C}_{19}\text{H}_{20}\text{F}_2\text{NaO}_2$   $[\text{M}+\text{Na}]^+$ : 341.1324, Found: 341.1322.

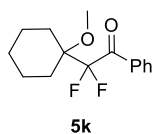

Column chromatography (PE/Et<sub>2</sub>O = 30:1, v/v) afforded **5k** in 85% yield as colorless oil;  $^1\text{H}$  NMR (300 MHz,  $\text{CDCl}_3$ ):  $\delta$  8.06-8.02 (m, 2H), 7.61-7.56 (m, 1H), 7.49-7.43 (m, 2H), 3.32 (s, 3H), 1.96-1.92 (m, 2H), 1.68-1.38 (m, 7H), 1.25-1.16 (m, 1H);  $^{13}\text{C}$  NMR (101 MHz,  $\text{CDCl}_3$ ):  $\delta$  191.24 (t,  $J = 28.0$  Hz), 135.08 (d,  $J = 1.8$  Hz), 133.54, 129.87 (t,  $J = 4.2$  Hz), 128.43, 120.33 (t,  $J = 264.3$  Hz), 77.79 (t,  $J = 22.3$  Hz), 51.63 (t,  $J = 2.0$  Hz), 27.88, 27.86, 27.83, 25.02, 21.00;  $^{19}\text{F}$  NMR (282 MHz,  $\text{CDCl}_3$ ):  $\delta$  -108.25 (s, 2F); IR (ATR): 3030, 1751, 1579, 1448, 1219, 1014, 977, 830, 767; HRMS (ESI): Exact mass calcd for  $\text{C}_{15}\text{H}_{18}\text{F}_2\text{NaO}_2$   $[\text{M}+\text{Na}]^+$ : 291.1167, Found: 291.1173.

### 3) Procedure for the cascade aldol/carbonyl-ene reaction

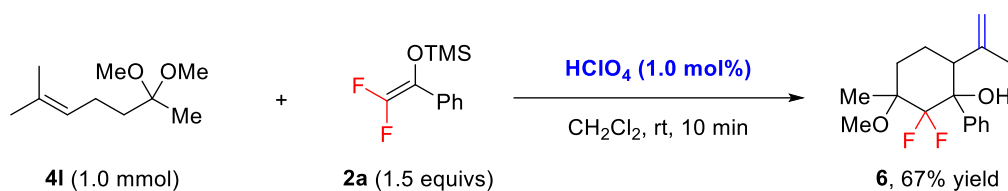

To a stirred mixture of ketal **4l** (172.3 mg, 1.0 mmol, 1.0 equiv) and difluoroenoxy silane **2a** (342.5 mg, 1.5 mmol, 1.5 equivs) in anhydrous  $\text{CH}_2\text{Cl}_2$  (1.0 mL) in 5.0 mL vial was added  $\text{HClO}_4$  (1.4 mg, 1 mol%, 70% wt., aq.) at room temperature. The resulting mixture was then stirred at room temperature. After full consumption of **4l** (ca. 10 min), the reaction mixture was concentrated under vacuum, and  $^1\text{H}$  NMR analysis of the residue with 600 MHz spectrometer revealed that the dr value was 10:1. The residue was then purified by flash column chromatography on silica gel using PE/Et<sub>2</sub>O (50:1, v/v) as eluents to afford the polysubstituted hexanol **6** in 67% yield as colorless oil (198.3 mg). The structure of **6** was confirmed by 2D NMR analysis.  $^1\text{H}$  NMR (400 MHz,  $\text{CDCl}_3$ ):  $\delta$  7.65 (dd,  $J = 6.9, 1.8$  Hz, 2H), 7.36-7.28 (m, 3H), 5.37 (s, 1H), 4.78 (s, 1H), 4.65 (s, 1H), 3.42 (s, 3H), 3.01-2.96 (m, 1H), 2.15-2.05 (m, 2H), 1.79-1.70 (m, 1H), 1.60 (s, 4H), 1.35 (d,  $J = 1.9$  Hz, 3H);  $^{13}\text{C}$  NMR (101 MHz,  $\text{CDCl}_3$ ):  $\delta$  144.77 (d,  $J = 1.8$  Hz), 138.32, 128.02 (d,  $J = 3.0$  Hz), 127.29, 127.15, 117.73 (dd,  $J = 268.7, 251.6$  Hz), 114.66, 79.72 (dd,  $J = 29.9, 21.8$  Hz), 78.93 (dd,  $J = 23.9, 21.2$  Hz), 50.11, 50.09 (d,  $J = 3.9$  Hz), 31.89 (d,  $J = 4.8$  Hz), 22.53, 22.50, 16.37 (t,  $J = 2.9$  Hz);  $^{19}\text{F}$  NMR (376 MHz,  $\text{CDCl}_3$ ):  $\delta$  -110.40 (d,  $J = 260.5$  Hz, 1F), -128.48 (d,  $J = 260.5$  Hz, 1F); IR (ATR): 3415, 3037, 2987, 2976, 1714, 1639, 1496, 1436, 1315, 1197, 1056, 964, 933, 840, 651; HRMS (ESI): Exact mass calcd for  $\text{C}_{17}\text{H}_{22}\text{F}_2\text{NaO}_2$   $[\text{M}+\text{Na}]^+$ : 319.1480, Found: 319.1486.

## Part II. Gram-scale synthesis

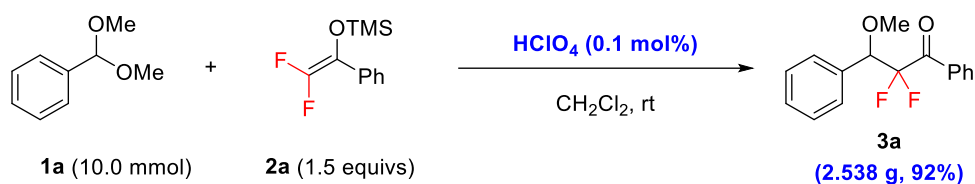

**General procedure:** To a stirred mixture of acetal **1a** (10.0 mmol, 1.0 equiv) and difluoroenoxy silanes **2a** (15 mmol, 1.5 equivs) in anhydrous  $\text{CH}_2\text{Cl}_2$  (10.0 mL, 1.0 M) in 25 mL flame-dried Schleck tube was added  $\text{HClO}_4$  (1.4 mg, 0.1 mol%, 70% wt., aq.) at room temperature. The resulting mixture was then stirred at room temperature. After 30 minutes, the reaction was concentration under vacuum and purified by flash column chromatography on silica gel using the PE/ $\text{Et}_2\text{O}$  (50:1, v/v) as eluents to afford 2.538 g of products **3a** in 92% yield.

## Part III. Product transformation

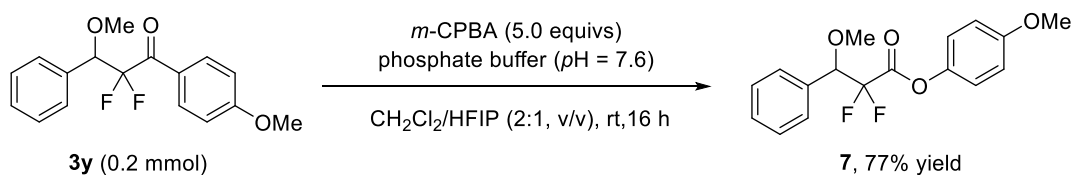

To a solution of compound **3y** (55.0 mg, 0.2 mmol, 1.0 equiv) in the mixed solvent of  $\text{CH}_2\text{Cl}_2$  (2.0 mL) and HFIP (1.0 mL) was subsequently added *m*-chloroperoxybenzoic acid (*m*-CPBA, 202.0 mg, 1.0 mmol, 85% wt, 5.0 equivs) and phosphate buffer (0.2 mL, pH = 7.6).<sup>4</sup> The resulting mixture was stirred at room temperature until full consumption of **3y** (about 16 h), then sat. aq.  $\text{NaHCO}_3$  solution was added to quench the reaction. After extracting with  $\text{CH}_2\text{Cl}_2$  (6 mL  $\times$  3), the combined organic layer was washed with brine, then dried over anhydrous  $\text{Na}_2\text{SO}_4$ , and concentrated under reduced pressure. The crude residue was purified by column chromatography (PE/ $\text{EtOAc}$  = 10/1, v/v) to give the ester **7** in 77% yield as colorless oil.  $^1\text{H}$  NMR (300 MHz,  $\text{CDCl}_3$ ):  $\delta$  7.51-7.43 (m, 5H), 7.08-7.02 (m, 2H), 6.95-6.91 (m, 2H), 4.86 (dd,  $J$  = 17.4, 7.0 Hz, 1H), 3.82 (s, 3H), 3.42 (s, 3H);  $^{13}\text{C}$  NMR (101 MHz,  $\text{CDCl}_3$ ):  $\delta$  162.46 (dd,  $J$  = 34.0, 31.0 Hz), 157.90, 143.37, 132.02 (d,  $J$  = 1.5 Hz), 129.52, 128.75, 128.53, 121.76, 114.67, 113.52 (dd,  $J$  = 262.3, 251.3 Hz), 82.48 (dd,  $J$  = 29.3, 22.6 Hz), 58.01, 55.62;  $^{19}\text{F}$  NMR (282 MHz,  $\text{CDCl}_3$ ):  $\delta$  -111.17 (dd,  $J$  = 262.0, 6.8 Hz, 1F), -121.48 (dd,  $J$  = 261.6, 16.1 Hz, 1F); IR (ATR): 1793, 1714, 1506, 1363, 1290, 1186, 1091, 1064, 920, 715; HRMS (ESI): Exact mass calcd for  $\text{C}_{17}\text{H}_{16}\text{F}_2\text{NaO}_4$  [ $\text{M}+\text{Na}$ ] $^+$ : 345.0909, Found: 345.0910.

<sup>4</sup> S. Kobayashi, H. Tanaka, H. Amii and K. Uneyama, *Tetrahedron*, 2003, **59**, 1547.

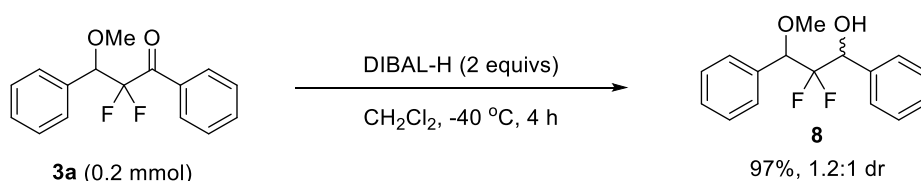

To a stirred solution of **3a** (55.0 mg, 0.2 mmol, 1.0 equiv) in anhydrous  $\text{CH}_2\text{Cl}_2$  (2.0 mL) at  $-40\text{ }^\circ\text{C}$  was added DIBAL-H (0.4 mL, 1.0 M in hexane, 0.4 mmol, 2.0 equivs). The resulting mixture was stirred at  $-40\text{ }^\circ\text{C}$  until full consumption of **3a** by TLC analysis (about 4 h), and then quenched by saturated NaCl (aq.). The mixture was extracted with EtOAc (6 mL  $\times$  3), then the combined organic layer was washed with brine, and dried over  $\text{Na}_2\text{SO}_4$ , filtered, and concentrated under vacuo.  $^1\text{H}$ ,  $^{19}\text{F}$  NMR analysis of crude mixture revealed that the dr value was 1.2:1. The crude residue was then purified by column chromatography (PE/toluene = 1/2, v/v) to give the corresponding product **8** in total 97% yield as colorless oil. *Notably, two diastereomers of 8 could be easily isolated by column chromatography.*  **$^1\text{H}$  NMR for the major diastereomer** (400 MHz,  $\text{CDCl}_3$ ):  $\delta$  7.52-7.49 (m, 2H), 7.43-7.38 (m, 8H), 5.13 (t,  $J = 12.7$  Hz, 1H), 4.20 (dd,  $J = 18.4, 6.2$  Hz, 1H), 3.23 (s, 3H), 2.91 (s, 1H);  **$^{13}\text{C}$  NMR the major diastereomer** (101 MHz,  $\text{CDCl}_3$ ):  $\delta$  136.46 (d,  $J = 4.5$  Hz), 133.35 (d,  $J = 1.7$  Hz), 128.95, 128.85, 128.81, 128.39, 128.26, 128.06, 119.54 (dd,  $J = 256.9, 247.3$  Hz), 82.58 (dd,  $J = 31.4, 23.1$  Hz), 74.23 (t,  $J = 24.6$  Hz), 57.09;  **$^{19}\text{F}$  NMR the major diastereomer** (376 MHz,  $\text{CDCl}_3$ ):  $\delta$  -119.91 (d,  $J = 256.0$  Hz, 1F), -124.60 (d,  $J = 256.1$  Hz, 1F). IR (ATR): 3439, 1714, 1492, 1456, 1361, 1217, 1197, 1130, 1101, 1076, 1045, 980, 750, 642; HRMS (ESI): Exact mass calcd for  $\text{C}_{16}\text{H}_{16}\text{F}_2\text{NaO}_2$  [ $\text{M}+\text{Na}$ ] $^+$ : 301.1011, Found: 301.1010.  **$^1\text{H}$  NMR for the minor diastereomer** (400 MHz,  $\text{CDCl}_3$ ):  $\delta$  7.46 (d,  $J = 6.5$  Hz, 2H), 7.41-7.34 (m, 8H), 5.11 (t,  $J = 8.4$  Hz, 1H), 4.58 (dd,  $J = 14.6, 8.4$  Hz, 1H), 3.45 (s, 1H), 3.37 (s, 3H);  **$^{13}\text{C}$  NMR for the minor diastereomer** (126 MHz,  $\text{CDCl}_3$ ):  $\delta$  136.74, 133.27, 128.97, 128.68, 128.57, 128.31, 128.24, 127.68, 118.71 (dd,  $J = 252.0, 252.6$  Hz), 82.39 (dd,  $J = 31.3, 26.5$  Hz), 73.45 (dd,  $J = 29.7, 26.5$  Hz), 57.65;  **$^{19}\text{F}$  NMR for the minor diastereomer** (376 MHz,  $\text{CDCl}_3$ ):  $\delta$  -117.29 (d,  $J = 266.2$  Hz, 1F), -118.08 (d,  $J = 266.2$  Hz, 1F); IR (ATR): 3460, 1714, 1456, 1361, 1219, 1157, 1103, 1076, 981, 977, 700; HRMS (ESI): Exact mass calcd for  $\text{C}_{16}\text{H}_{16}\text{F}_2\text{NaO}_2$  [ $\text{M}+\text{Na}$ ] $^+$ : 301.1011, Found: 301.1013.

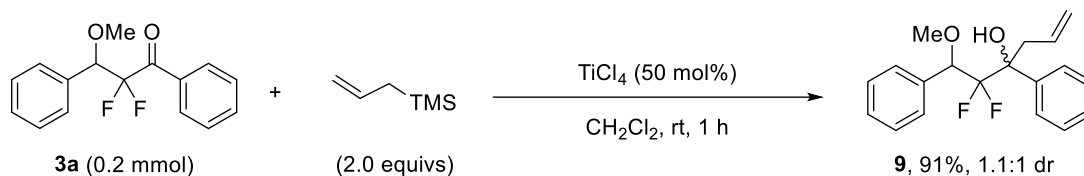

To a solution of compound **3a** (55.0 mg, 0.2 mmol, 1.0 equiv) in anhydrous  $\text{CH}_2\text{Cl}_2$  (2.0 mL) was subsequently added allyltrimethylsilane (45.6 mg, 0.4 mmol, 2.0 equivs) and  $\text{TiCl}_4$  (19.0 mg, 0.1 mmol, 50 mol%). The resulting mixture was stirred at room temperature until full consumption of **3a** (about 1 h), then saturated aq.  $\text{NaHCO}_3$  solution was added to quench the reaction. After extracting with  $\text{CH}_2\text{Cl}_2$  (6 mL  $\times$  3), the combined organic layer was washed with brine, then dried over  $\text{Na}_2\text{SO}_4$ , and concentrated under reduced pressure.  $^1\text{H}$ ,  $^{19}\text{F}$  NMR analysis of crude mixture revealed that the dr value was 1.1:1. The combined crude residue was then purified by column chromatography (PE/EtOAc = 20/1, v/v) to afford product **9** in total 91% yield as colorless oil. *Notably, two diastereomers of 9 could be easily isolated by column chromatography.*  **$^1\text{H}$  NMR for the major diastereomer** (400 MHz,  $\text{CDCl}_3$ ):  $\delta$  7.63 (d,  $J = 7.7$  Hz, 2H), 7.46 (t,  $J = 7.6$  Hz, 2H), 7.39-7.34 (m, 4H), 7.29-7.27 (m, 2H), 5.63-5.56 (m, 1H), 5.05-5.01 (m, 1H), 4.76 (s, 1H), 3.95 (dd,  $J = 22.2, 2.6$  Hz, 1H), 3.01 (s, 3H), 2.98-2.92 (m, 1H), 2.85-2.80 (m, 1H);  **$^{13}\text{C}$  NMR for the major diastereomer** (101 MHz,  $\text{CDCl}_3$ ):  $\delta$  141.03 (d,  $J = 4.4$  Hz), 132.61, 132.37, 129.03, 128.82, 128.37, 128.16, 127.78, 126.14 (d,  $J = 3.3$  Hz), 118.69 (dd,  $J = 265.9, 249.5$  Hz), 118.27, 83.58 (dd,  $J = 35.8, 23.8$  Hz), 79.40 (t,  $J = 24.2$  Hz), 56.92, 39.72 (dd,  $J = 4.4, 1.5$  Hz);  **$^{19}\text{F}$  NMR for the major diastereomer** (376 MHz,  $\text{CDCl}_3$ ):  $\delta$  -110.65 (d,  $J = 266.3$  Hz, 1F), -126.53 (d,  $J = 266.4$  Hz, 1F). IR (ATR): 3460, 3030, 1714, 1495, 1450, 1417, 1398, 1219, 1157, 1097, 1029, 985, 756; HRMS (ESI): Exact mass calcd for  $\text{C}_{19}\text{H}_{20}\text{F}_2\text{NaO}_2$  [ $\text{M}+\text{Na}$ ] $^+$ : 341.1324, Found: 341.1321;  **$^1\text{H}$  NMR for the minor diastereomer** (400 MHz,  $\text{CDCl}_3$ ):  $\delta$  7.51 (d,  $J = 7.6$  Hz, 2H), 7.31-7.18 (m, 8H), 5.58-5.47 (m, 1H), 5.06 (dd,  $J = 27.2, 13.3$  Hz, 1H), 4.51 (dd,  $J = 19.4, 4.9$  Hz, 1H), 3.40 (s, 1H), 3.06-3.00 (m, 1H), 3.00 (s, 3H), 2.77 (dd,  $J = 14.3, 7.6$  Hz, 1H);  **$^{13}\text{C}$  NMR for the minor diastereomer** (101 MHz,  $\text{CDCl}_3$ ):  $\delta$  138.98 (d,  $J = 2.1$  Hz), 133.80, 132.26, 128.88, 128.79, 128.10, 127.73, 127.53, 127.03 (d,  $J = 1.8$  Hz), 119.69, 119.30 (dd,  $J = 263.2, 249.9$  Hz), 82.33 (dd,  $J = 34.4, 22.7$  Hz), 77.81 (dd,  $J = 24.7, 25.4$  Hz), 56.85, 41.06 (dd,  $J = 3.7, 1.9$  Hz);  **$^{19}\text{F}$  NMR for the minor diastereomer** (376 MHz,  $\text{CDCl}_3$ )  $\delta$  -109.46 (d,  $J = 264.8$  Hz, 1F), -122.04 (d,  $J = 264.9$  Hz, 1F); IR (ATR): 3460, 3442, 3030, 1737, 1714, 1494, 1450, 1361, 1219, 1130, 1066, 920, 717; HRMS (ESI): Exact mass calcd for  $\text{C}_{19}\text{H}_{20}\text{F}_2\text{NaO}_2$  [ $\text{M}+\text{Na}$ ] $^+$ : 341.1324, Found: 341.1322.

Part IV.  $^1\text{H}$ ,  $^{13}\text{C}$ ,  $^{19}\text{F}$  NMR spectra

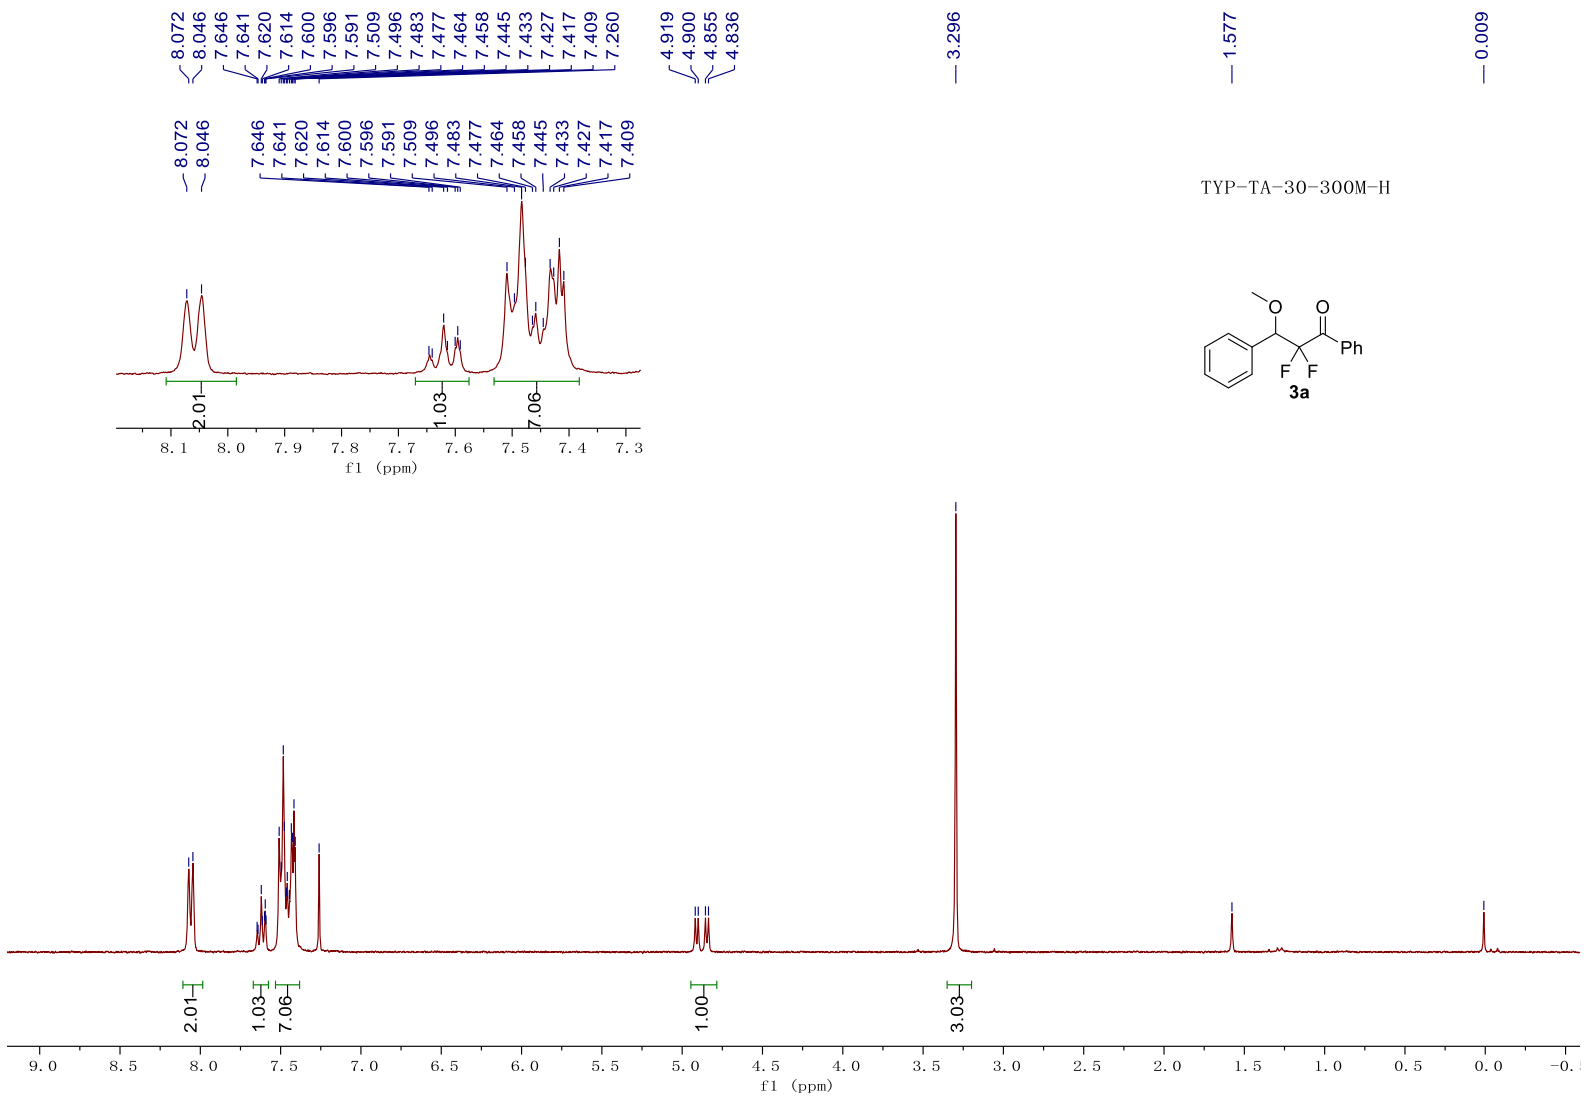

TYP-TA-30-300M-H

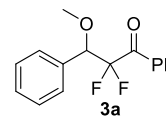



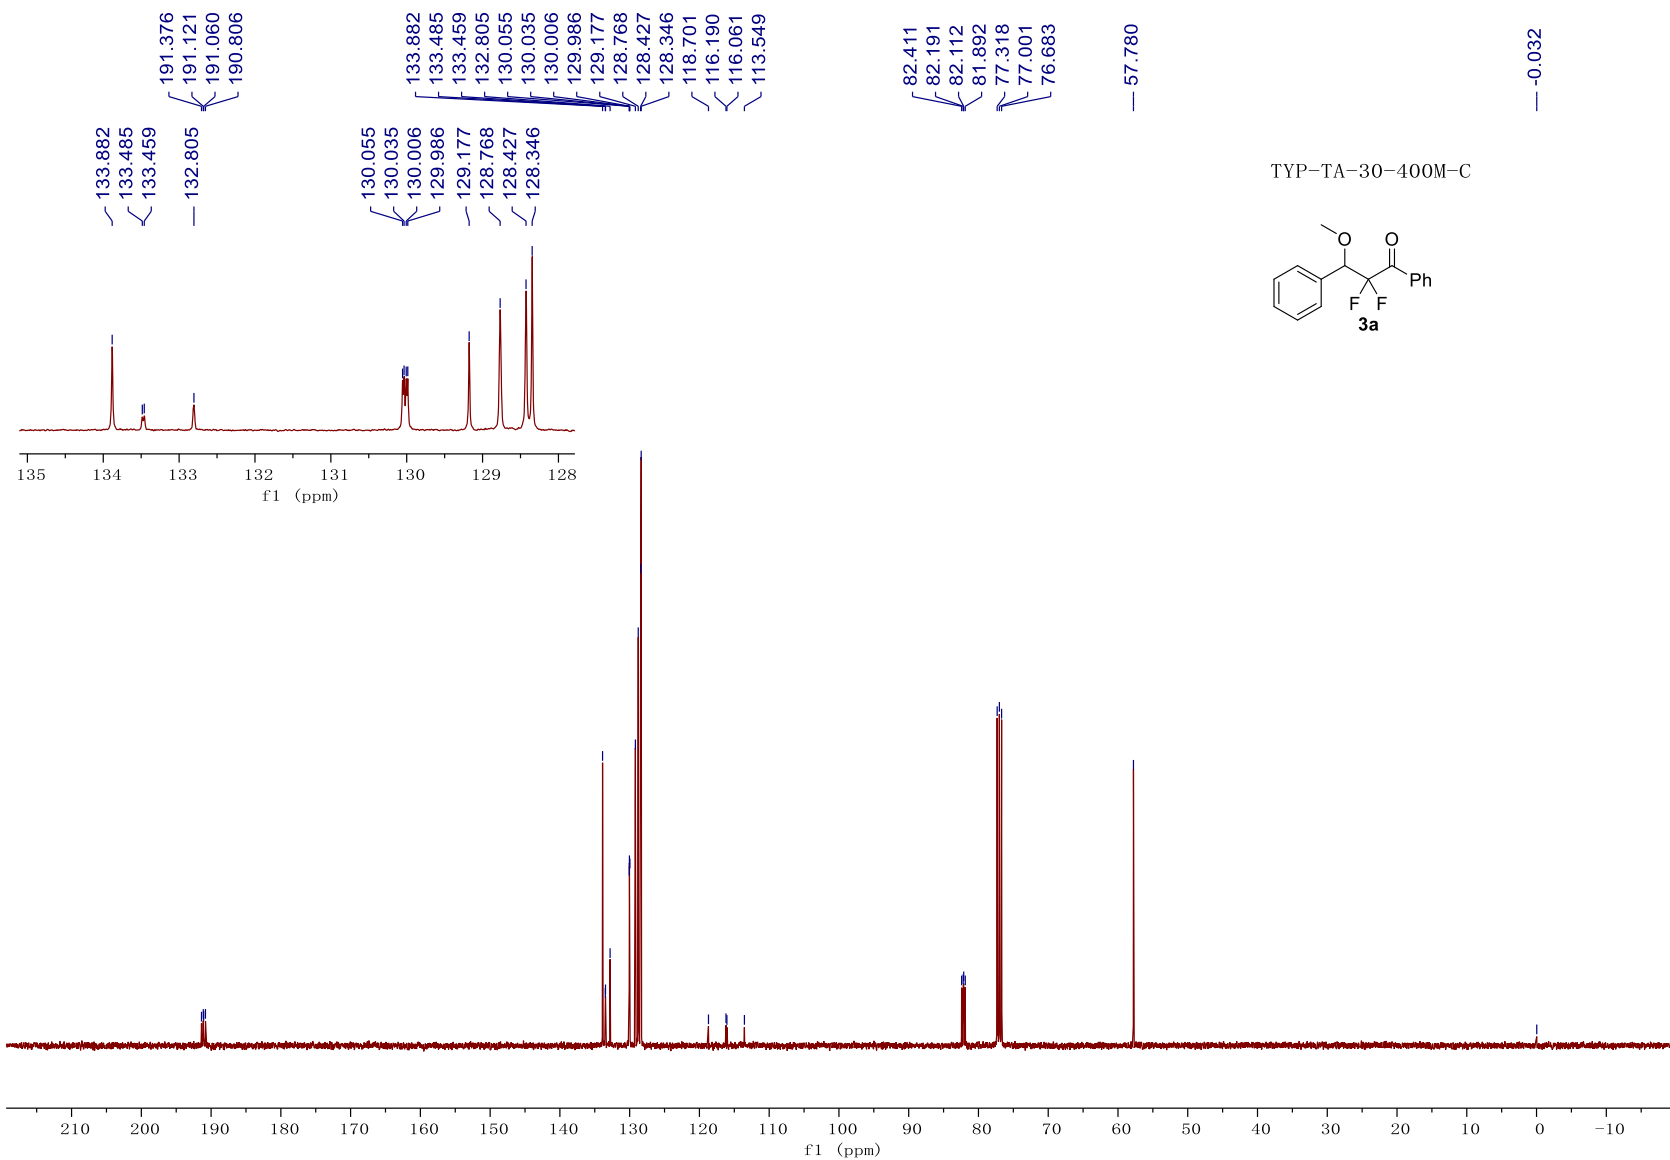

TYP-TA-30-400M-F

-103.537  
-104.265  
-117.366  
-118.092

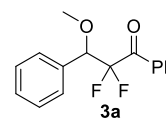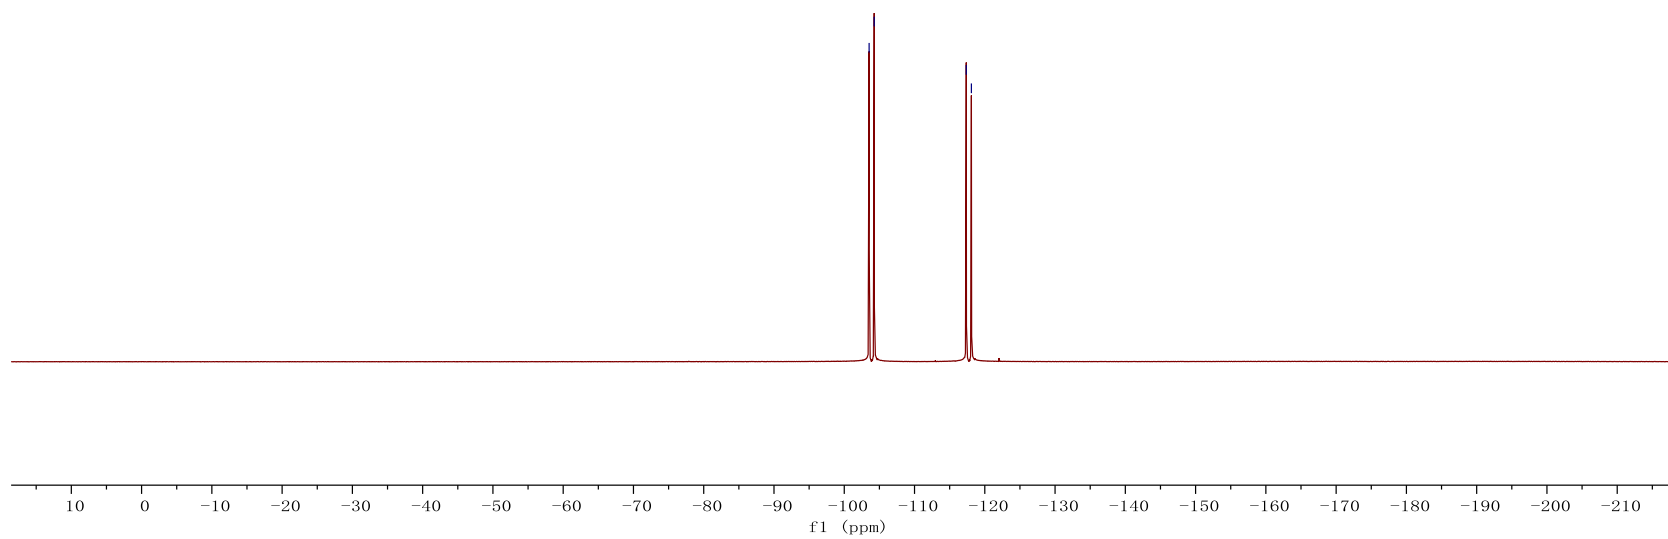

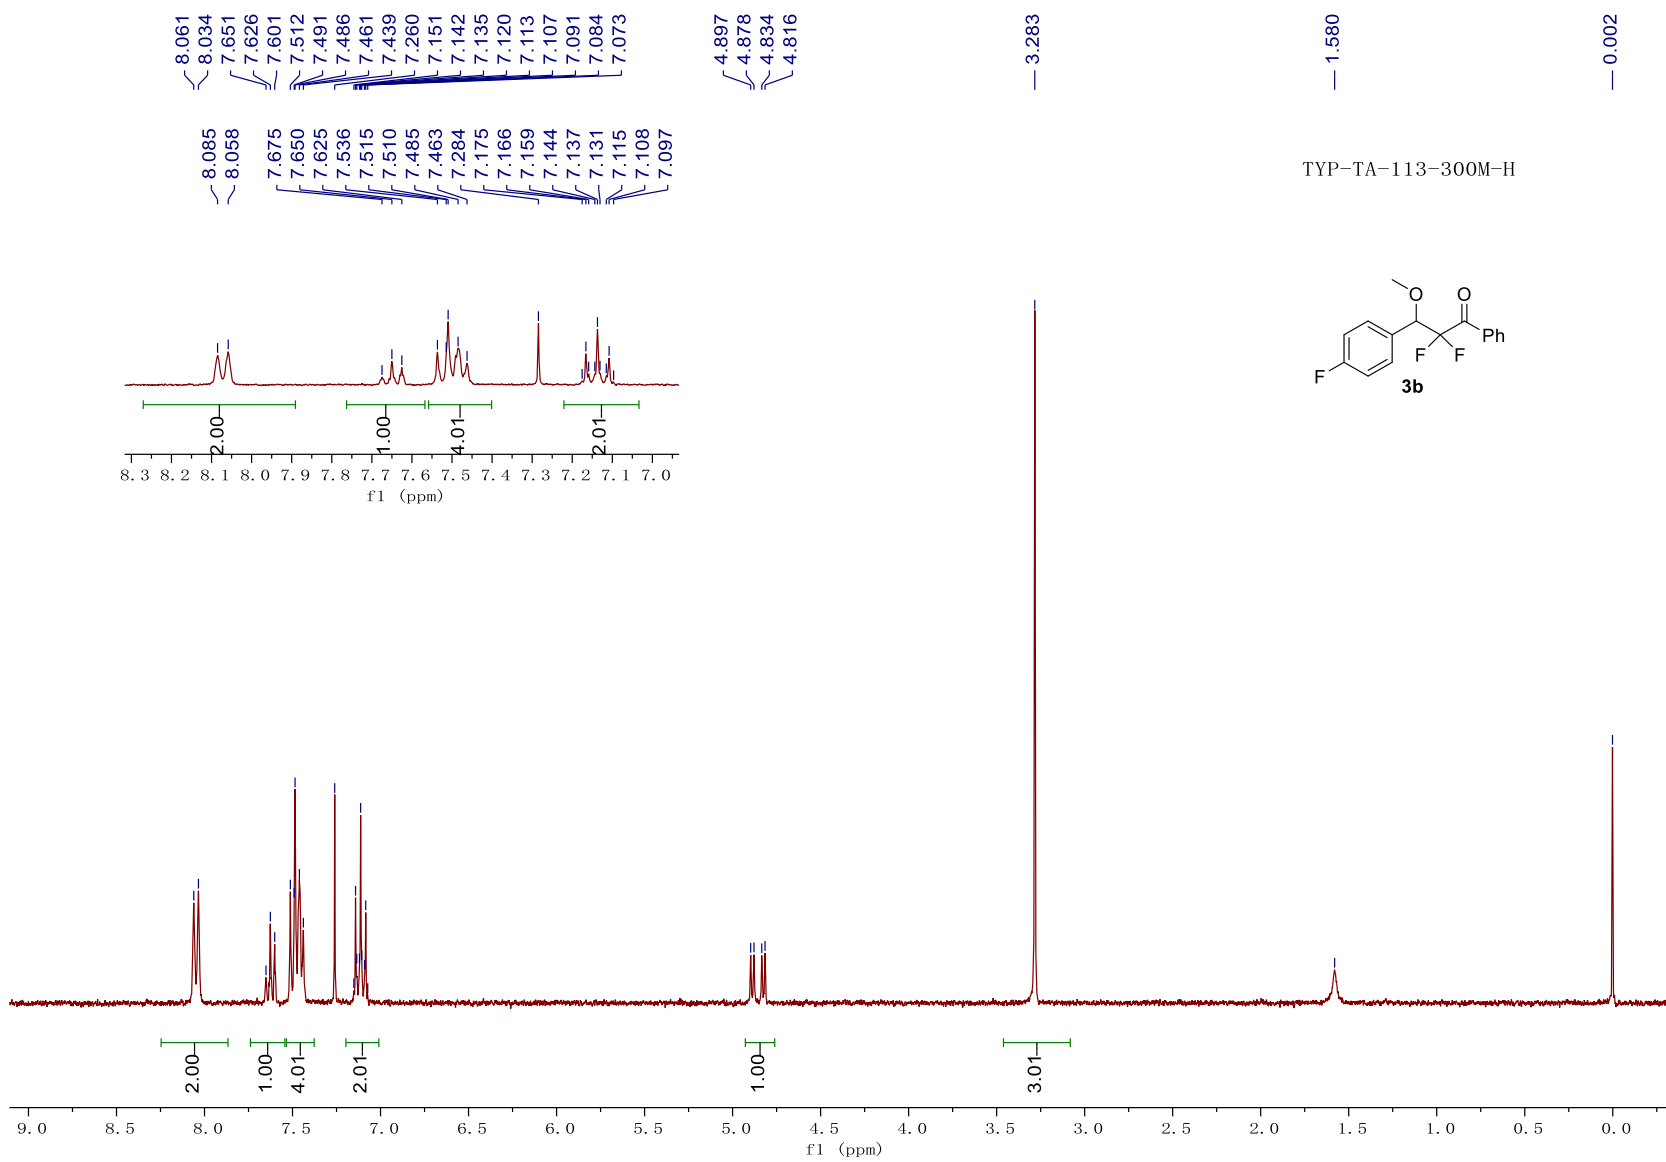

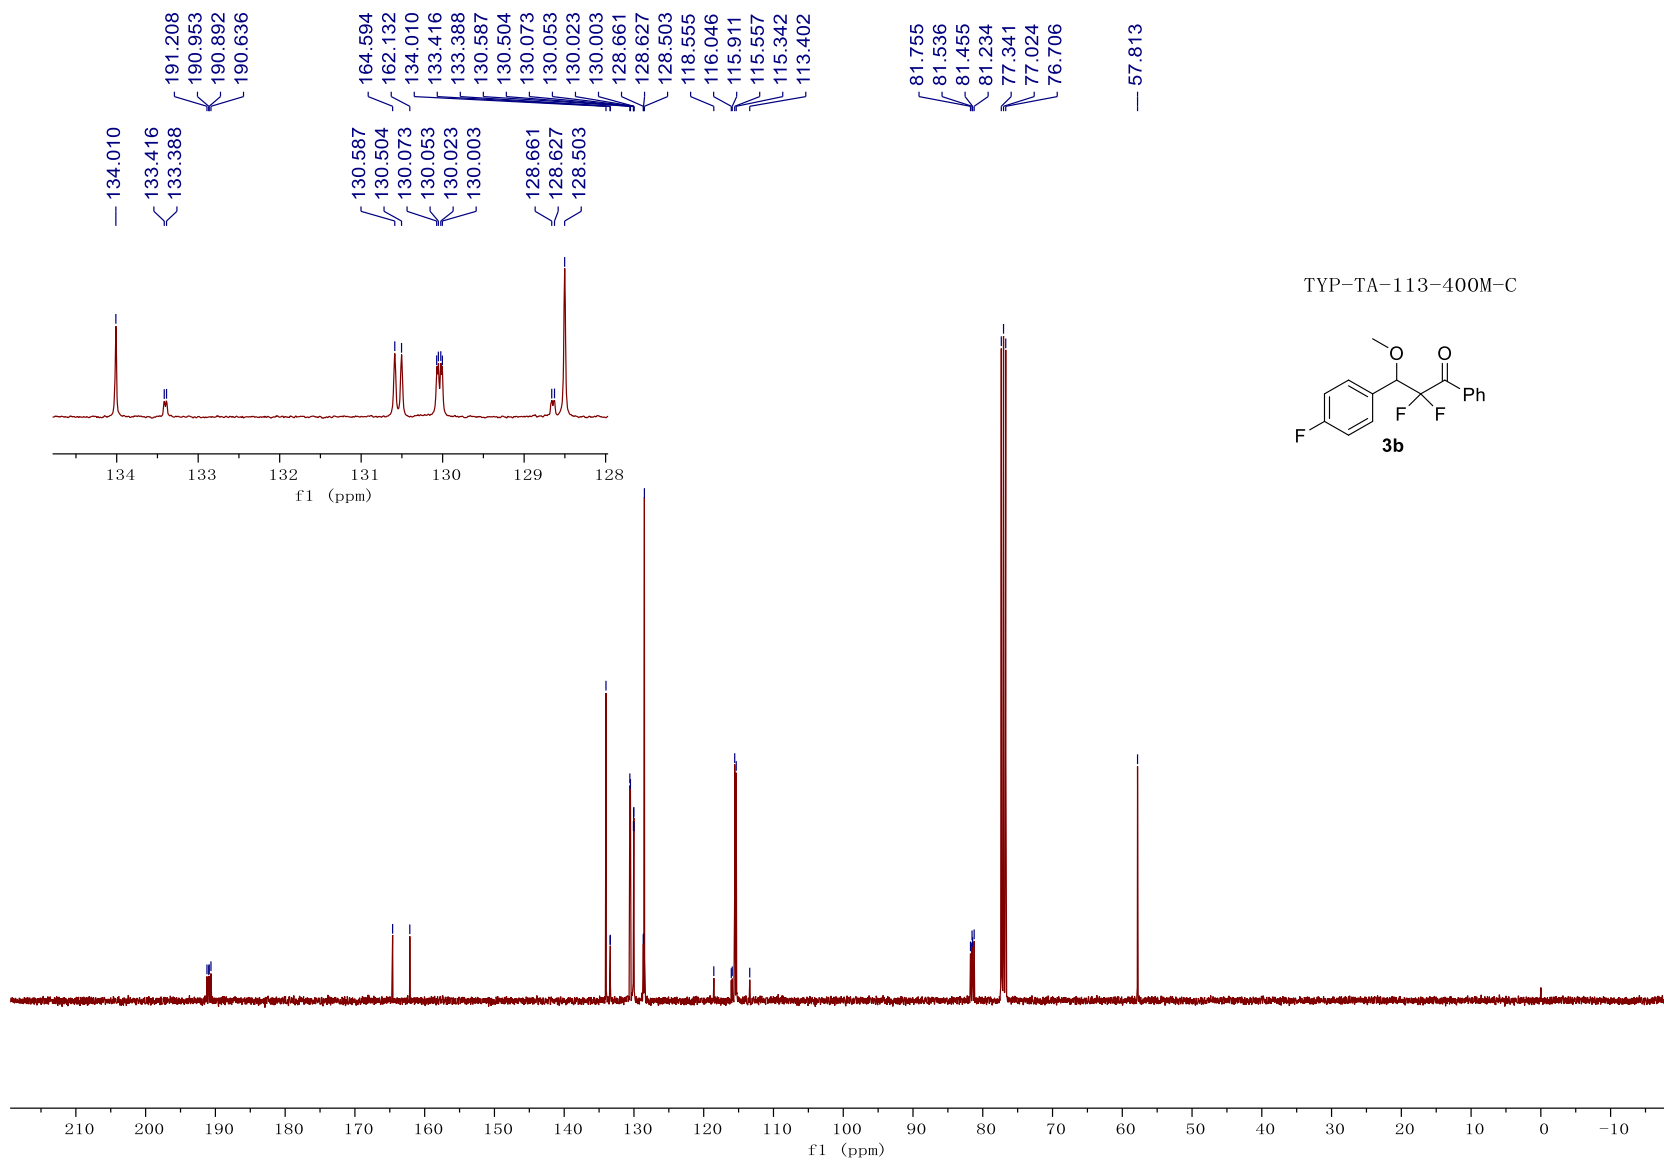

TYP-TA-113-400M-F

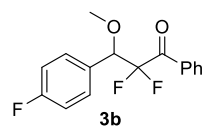

-103.457  
-104.189  
-112.515  
-117.715  
-118.447

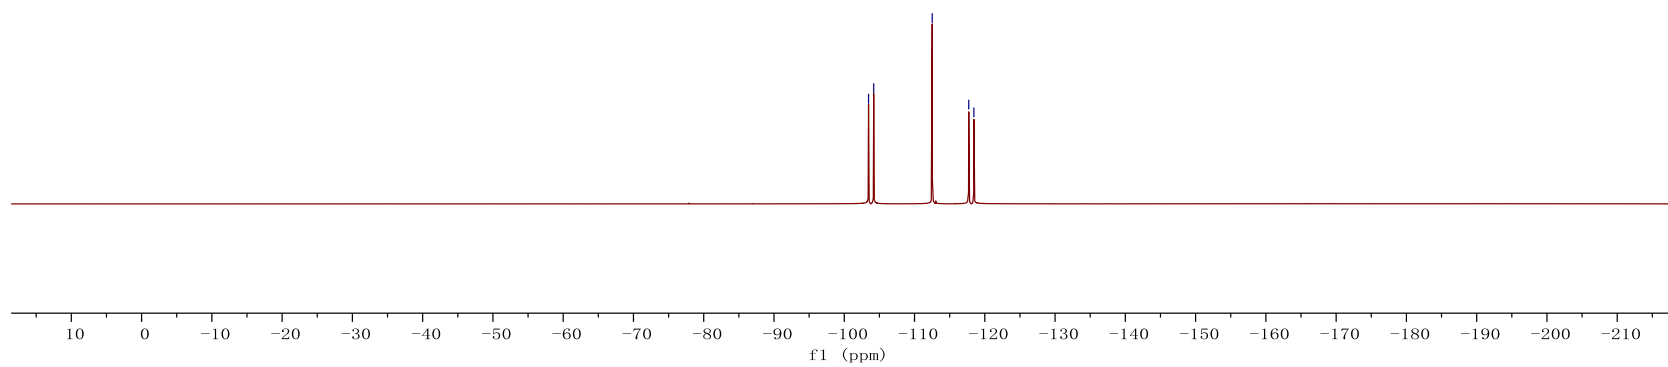

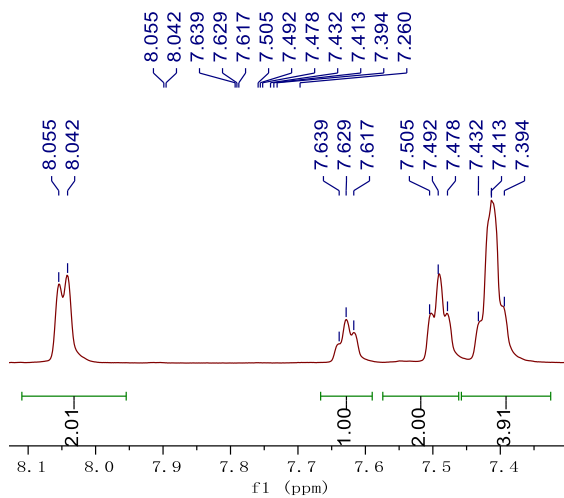

TYP-TA-101-600M-H

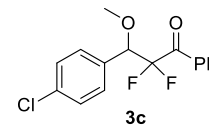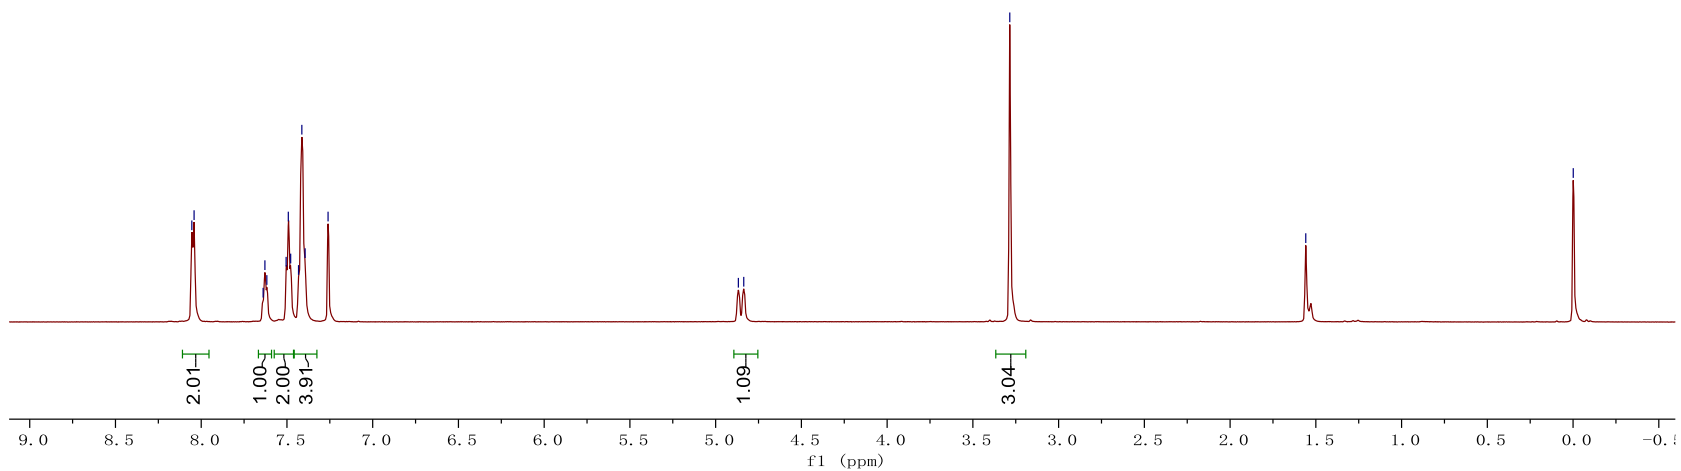

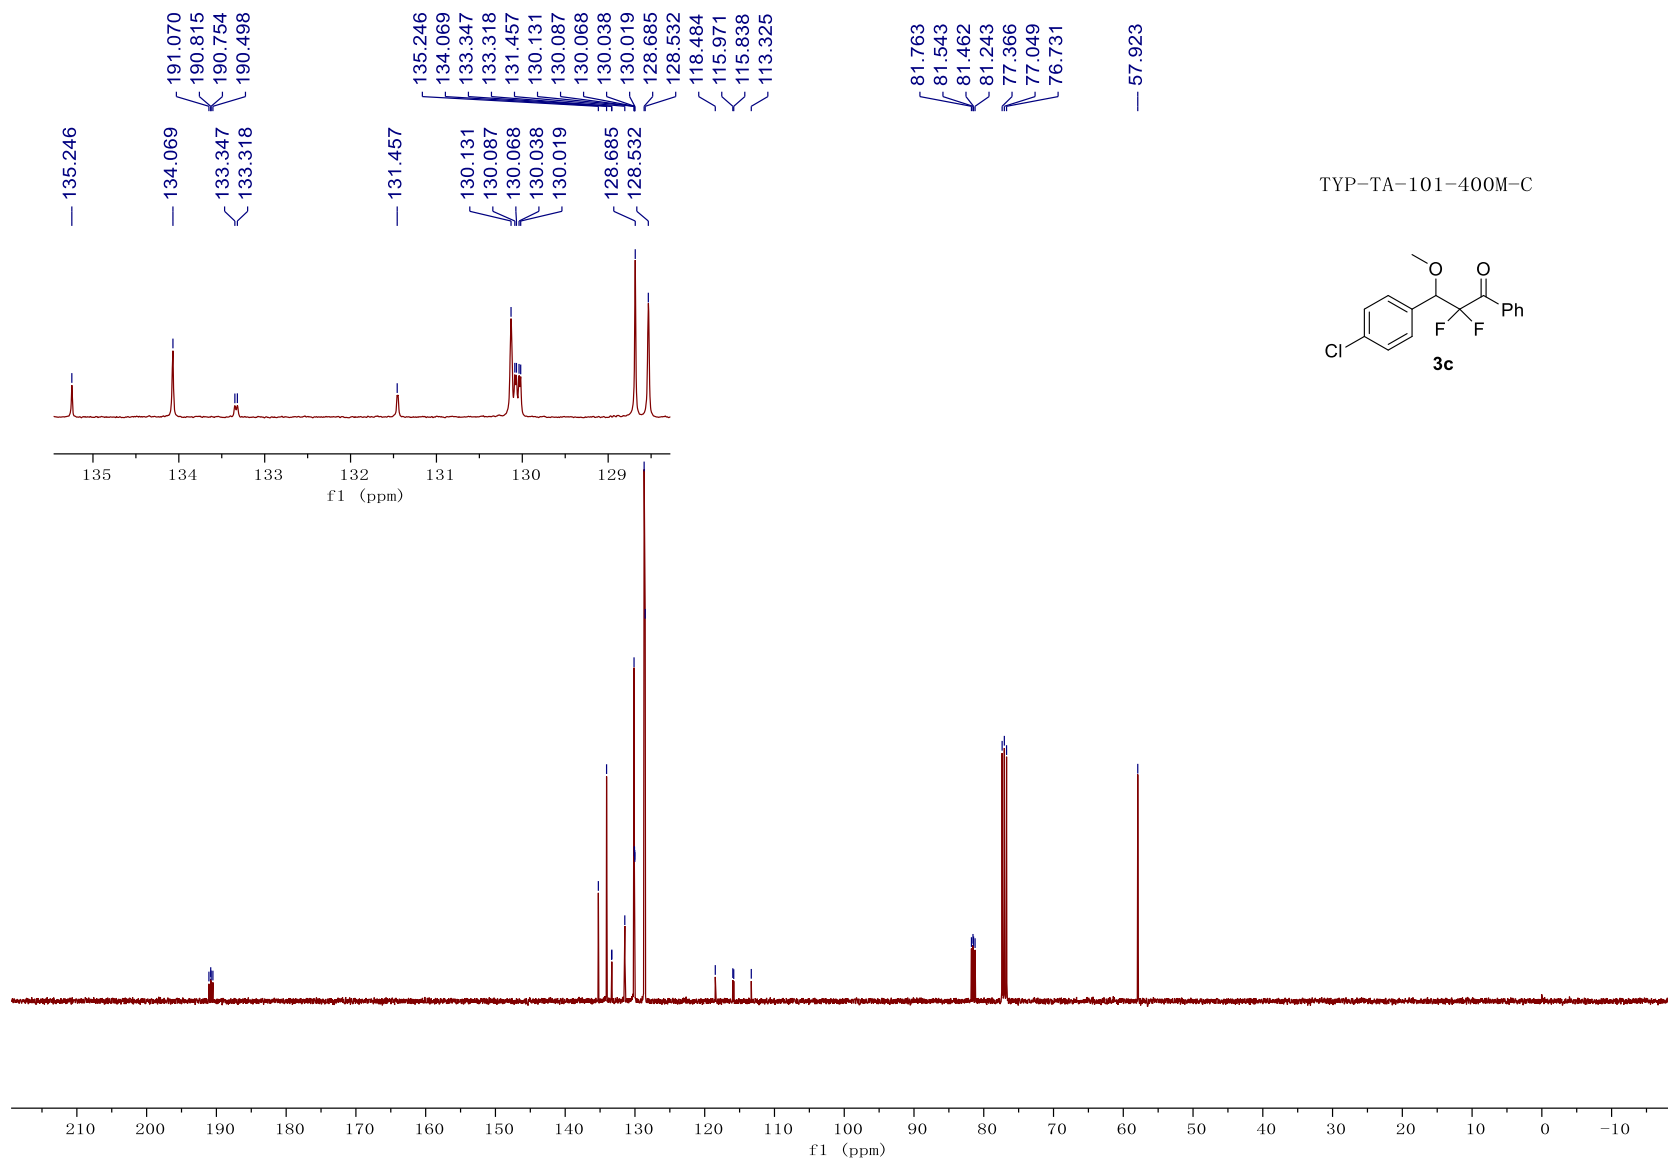

TYP-TA-101-400M-F

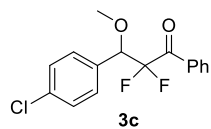

-103.291  
-104.025

-117.660  
-118.394

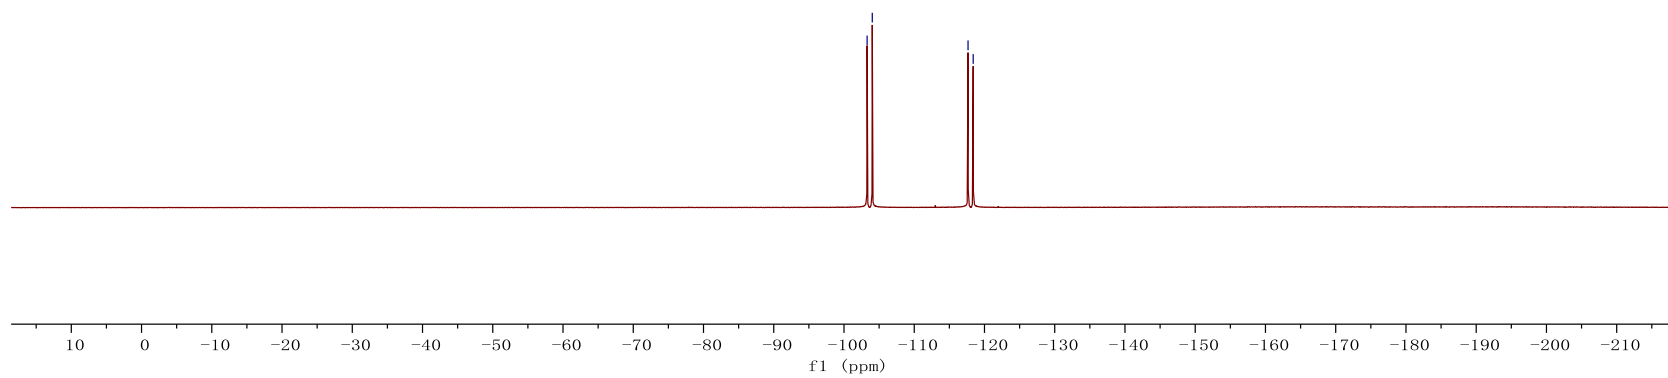



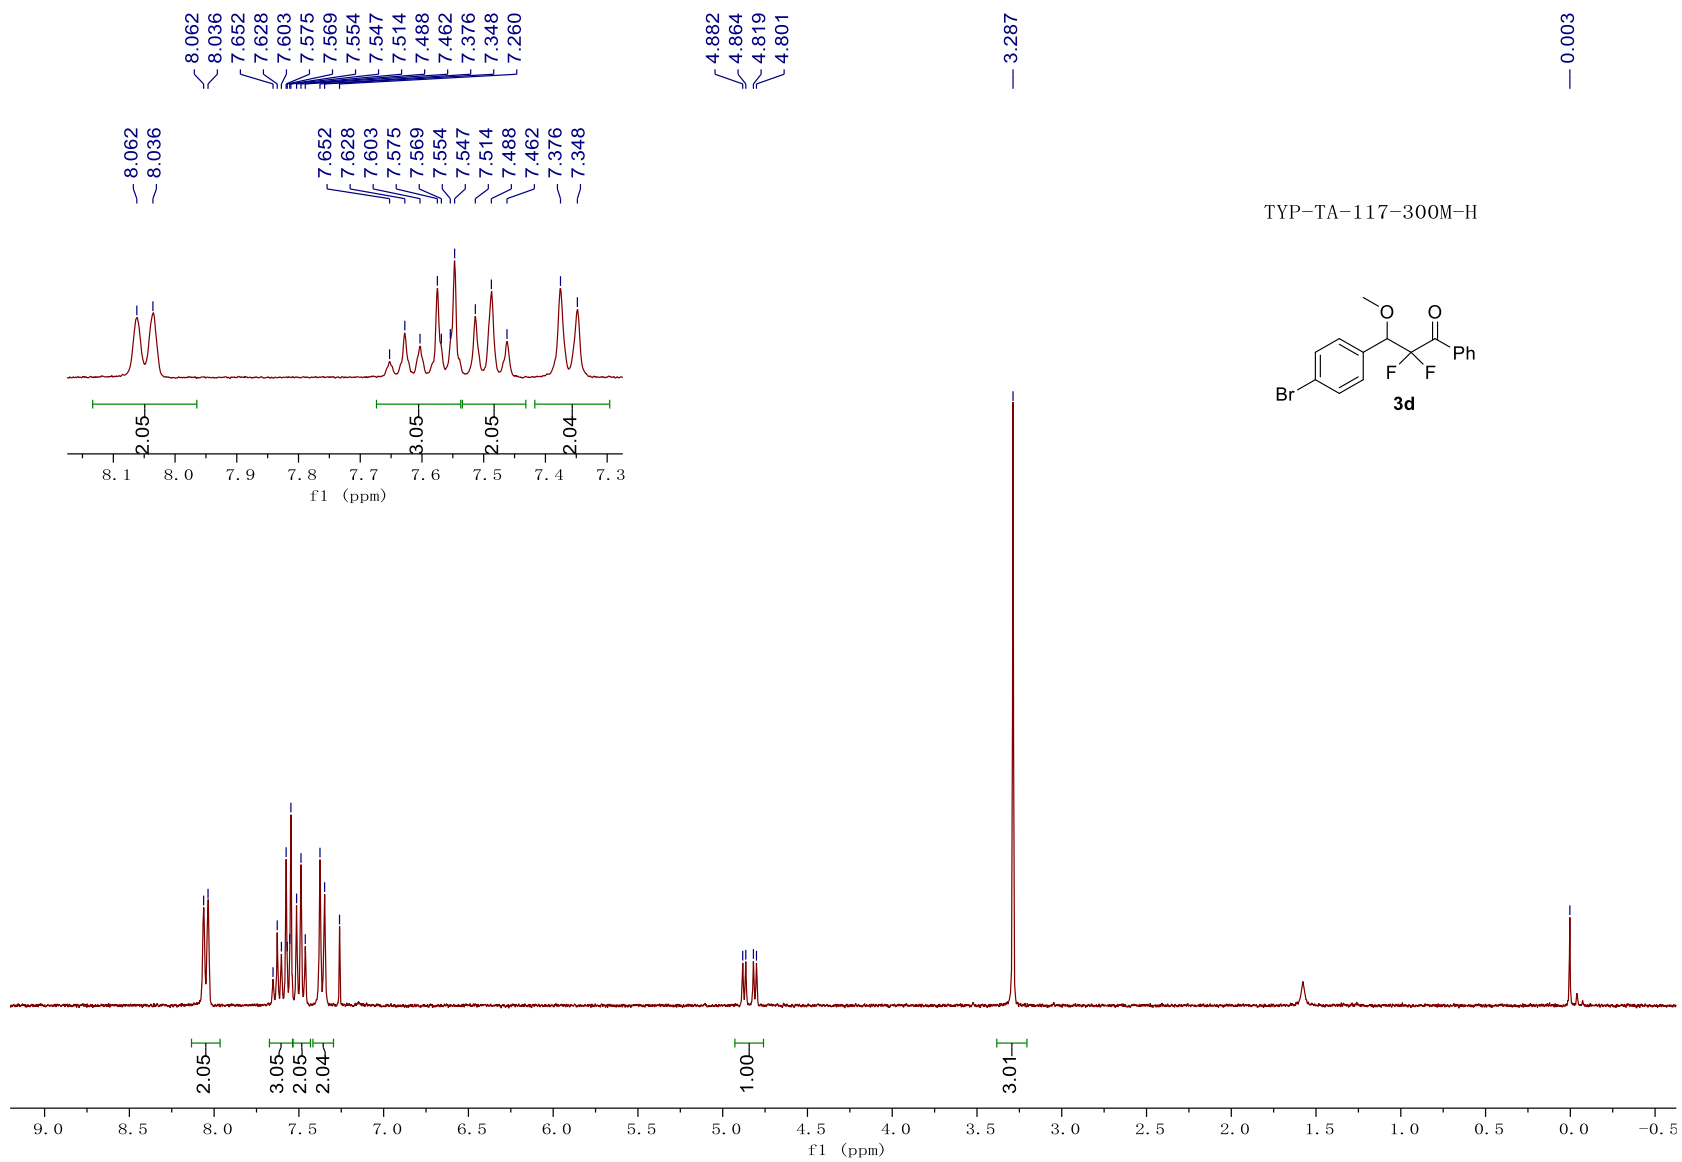

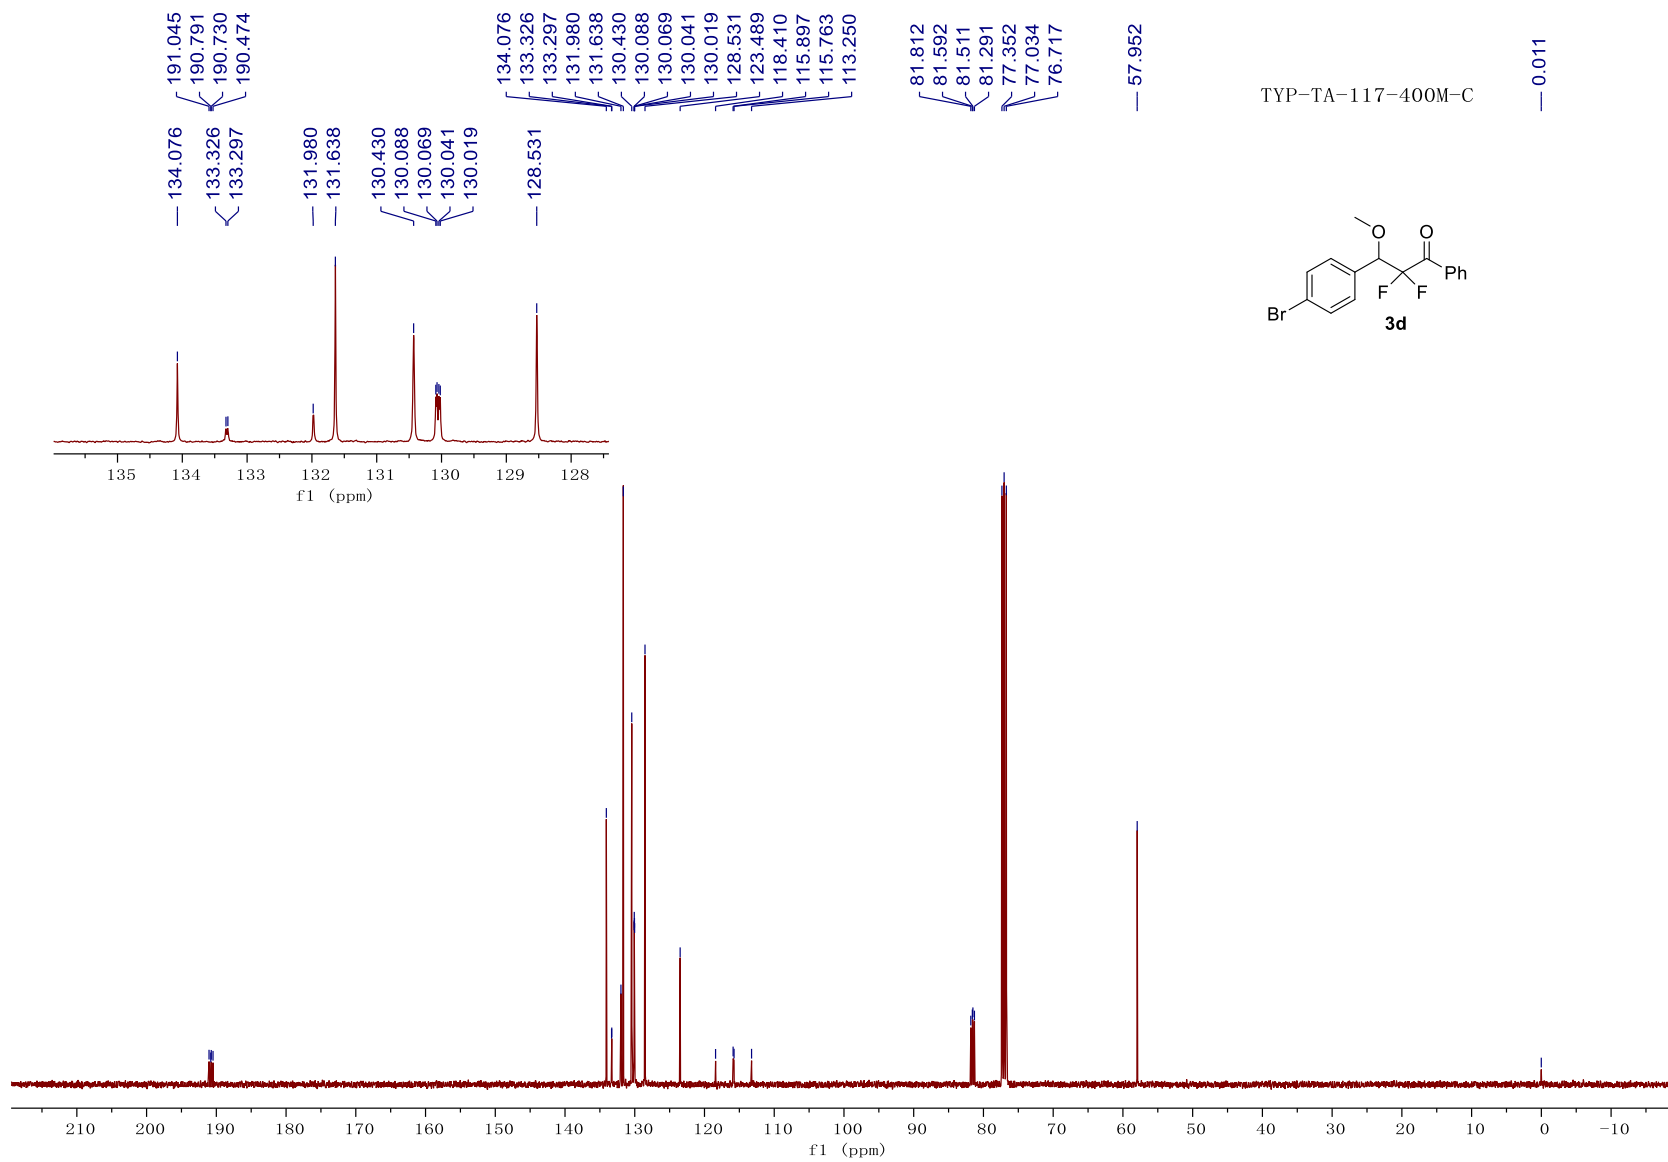

TYP-TA-117-300M-F

-103.116  
-103.136  
-104.095  
-104.114  
-117.509  
-117.570  
-118.488  
-118.550

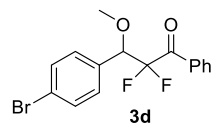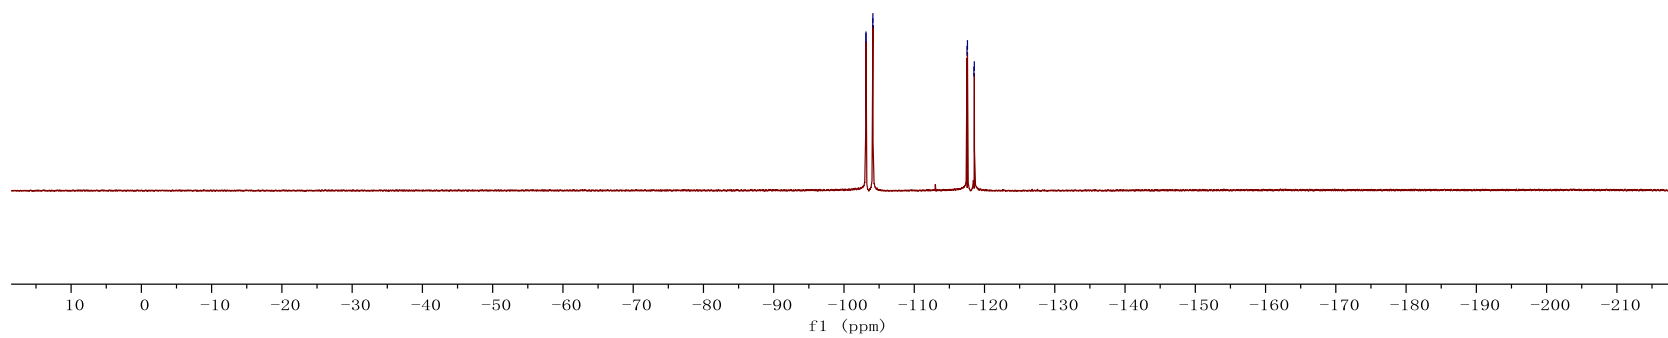

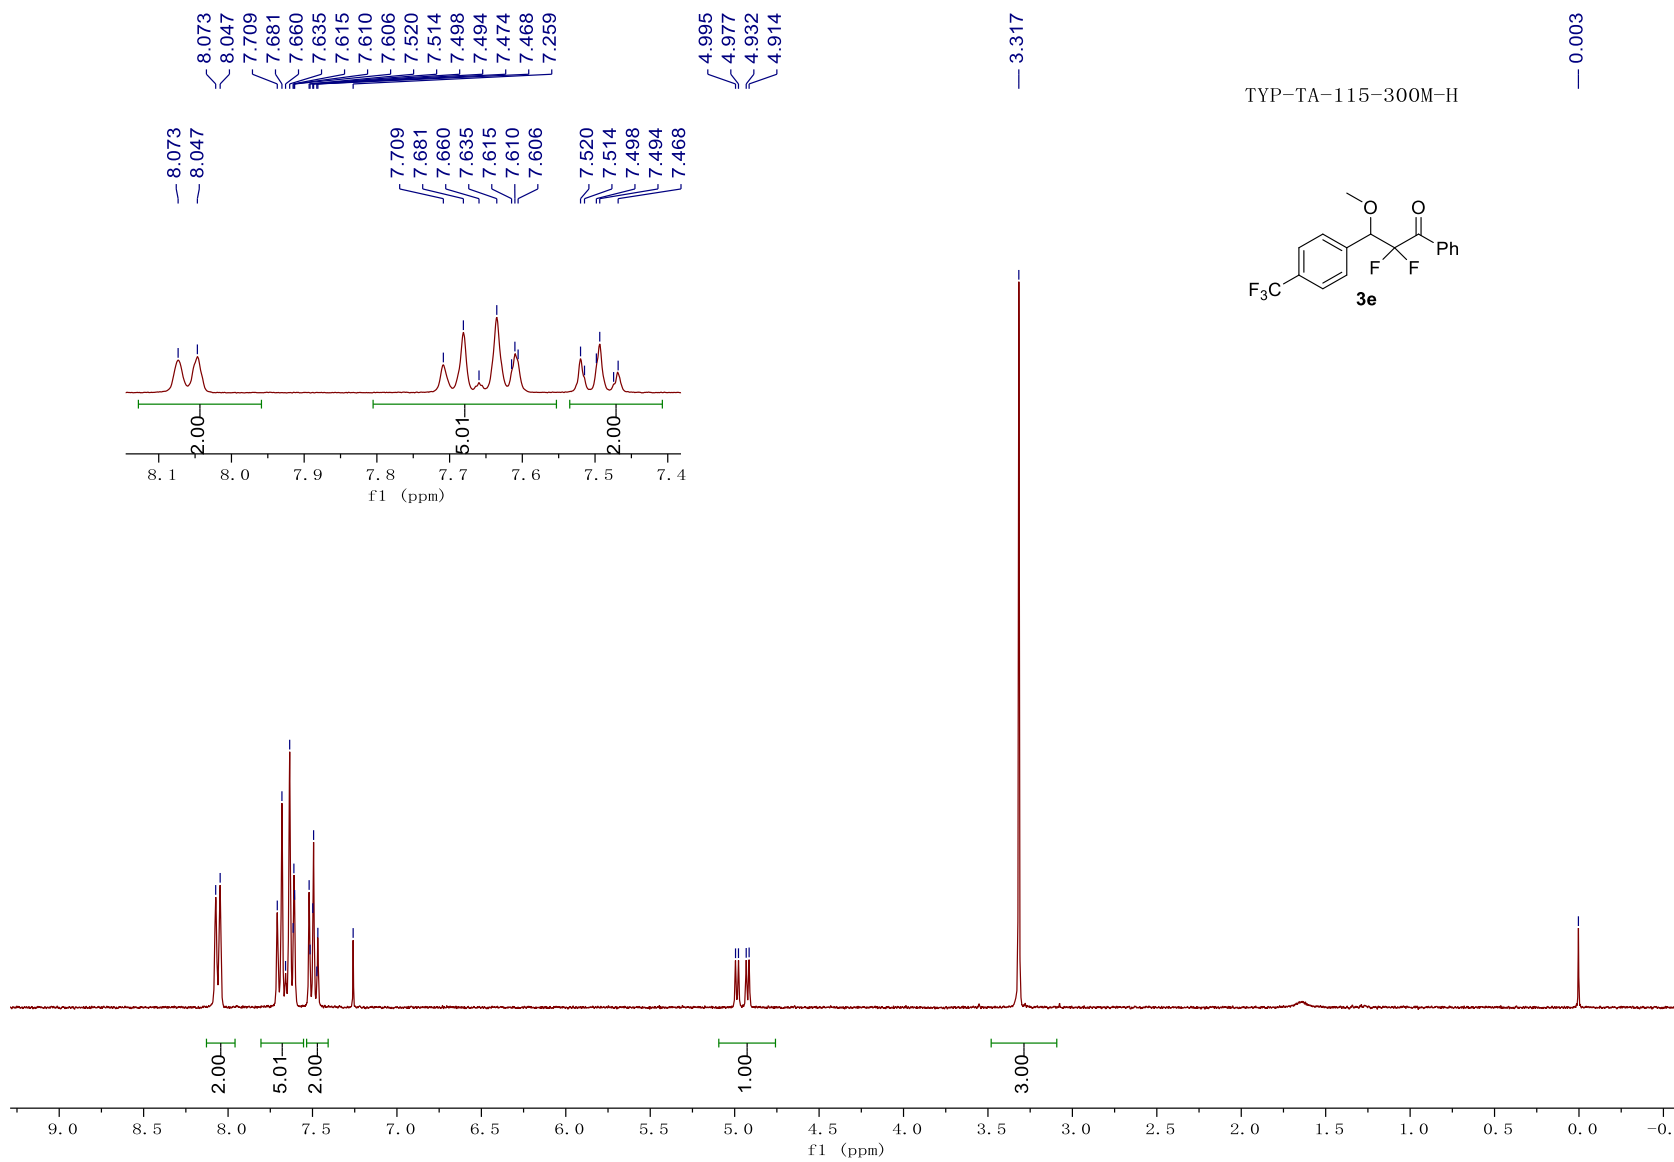

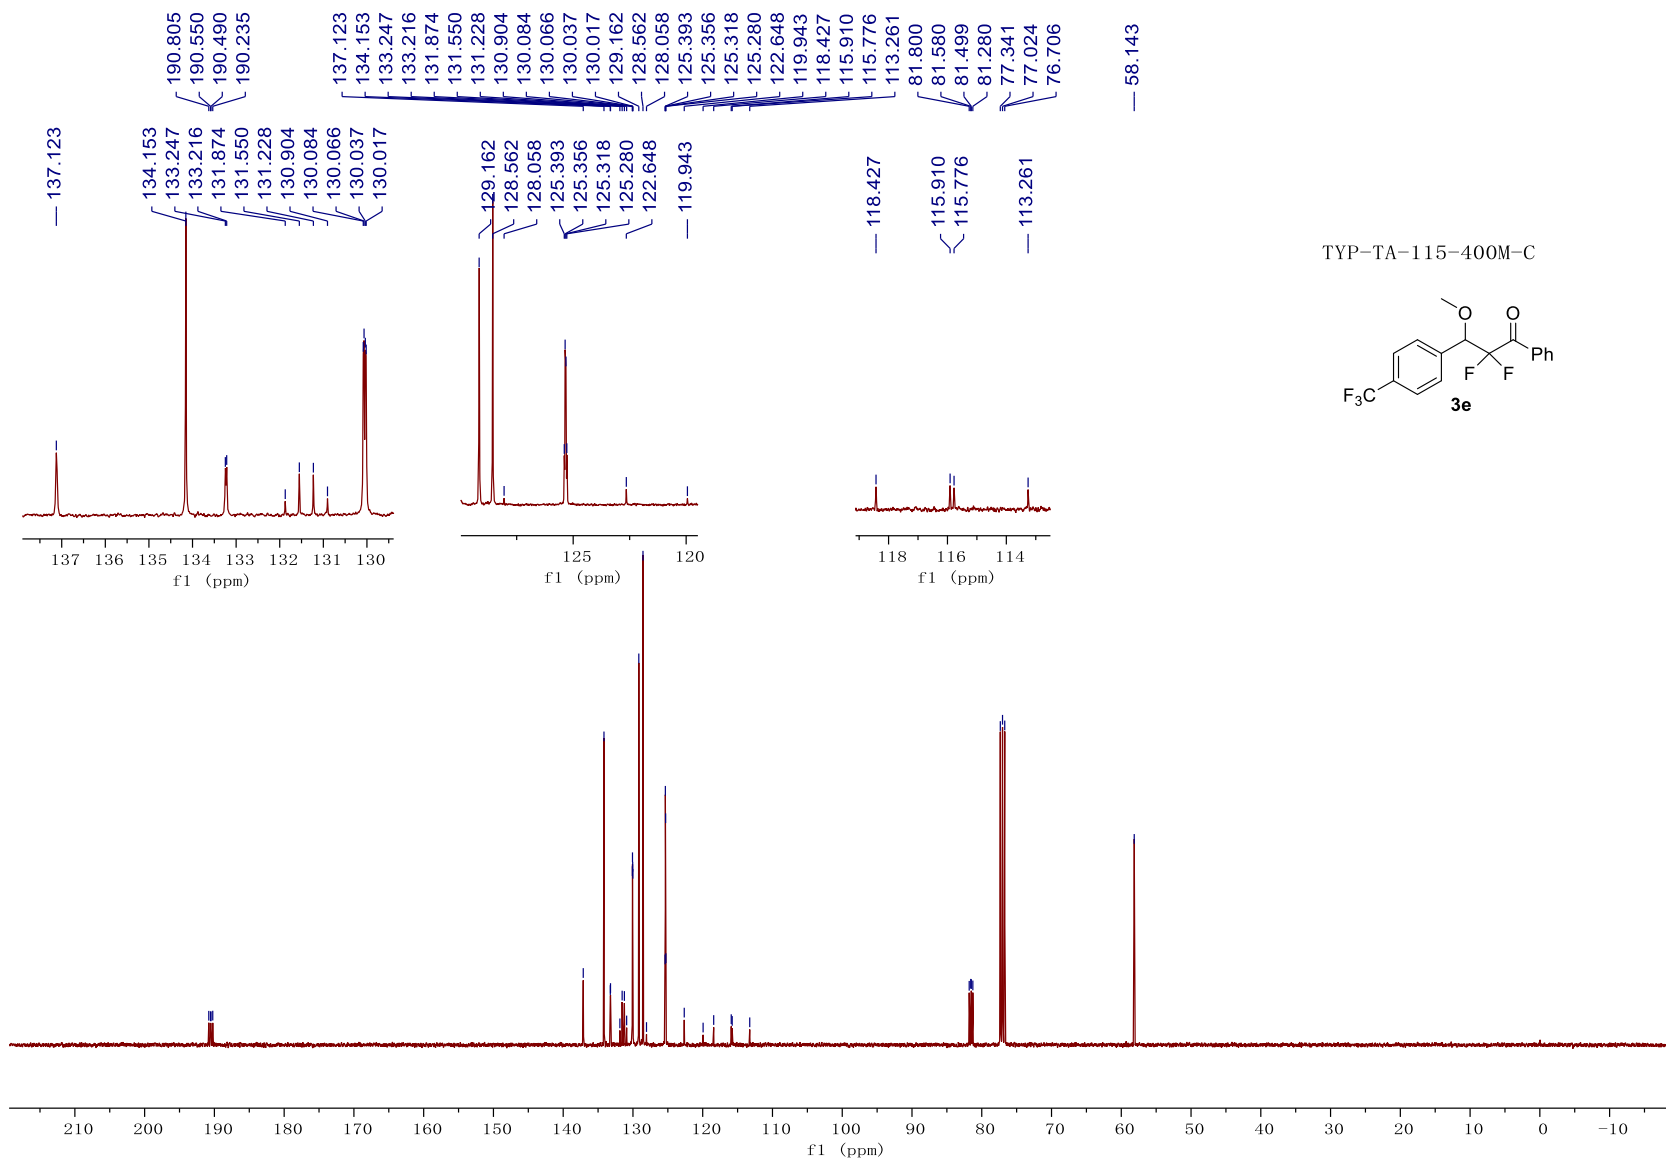

TYP-TA-115-300M-F

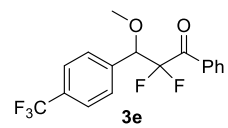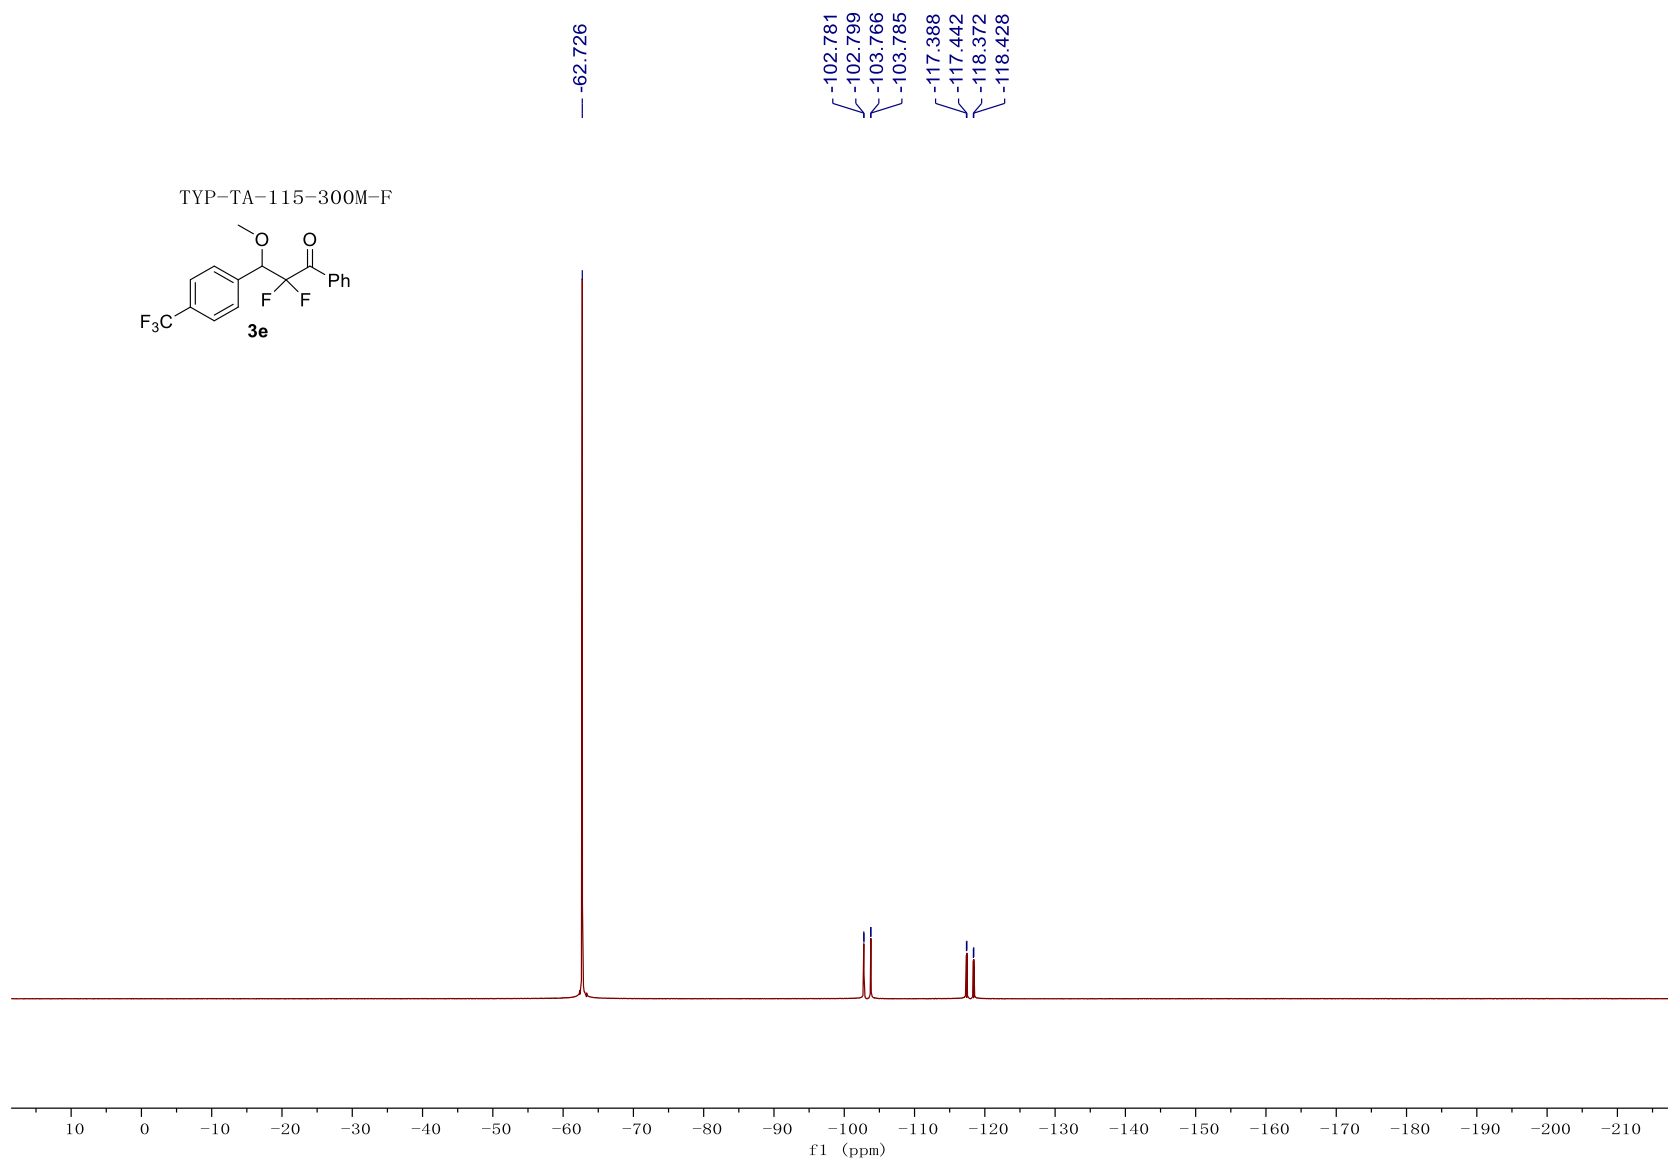

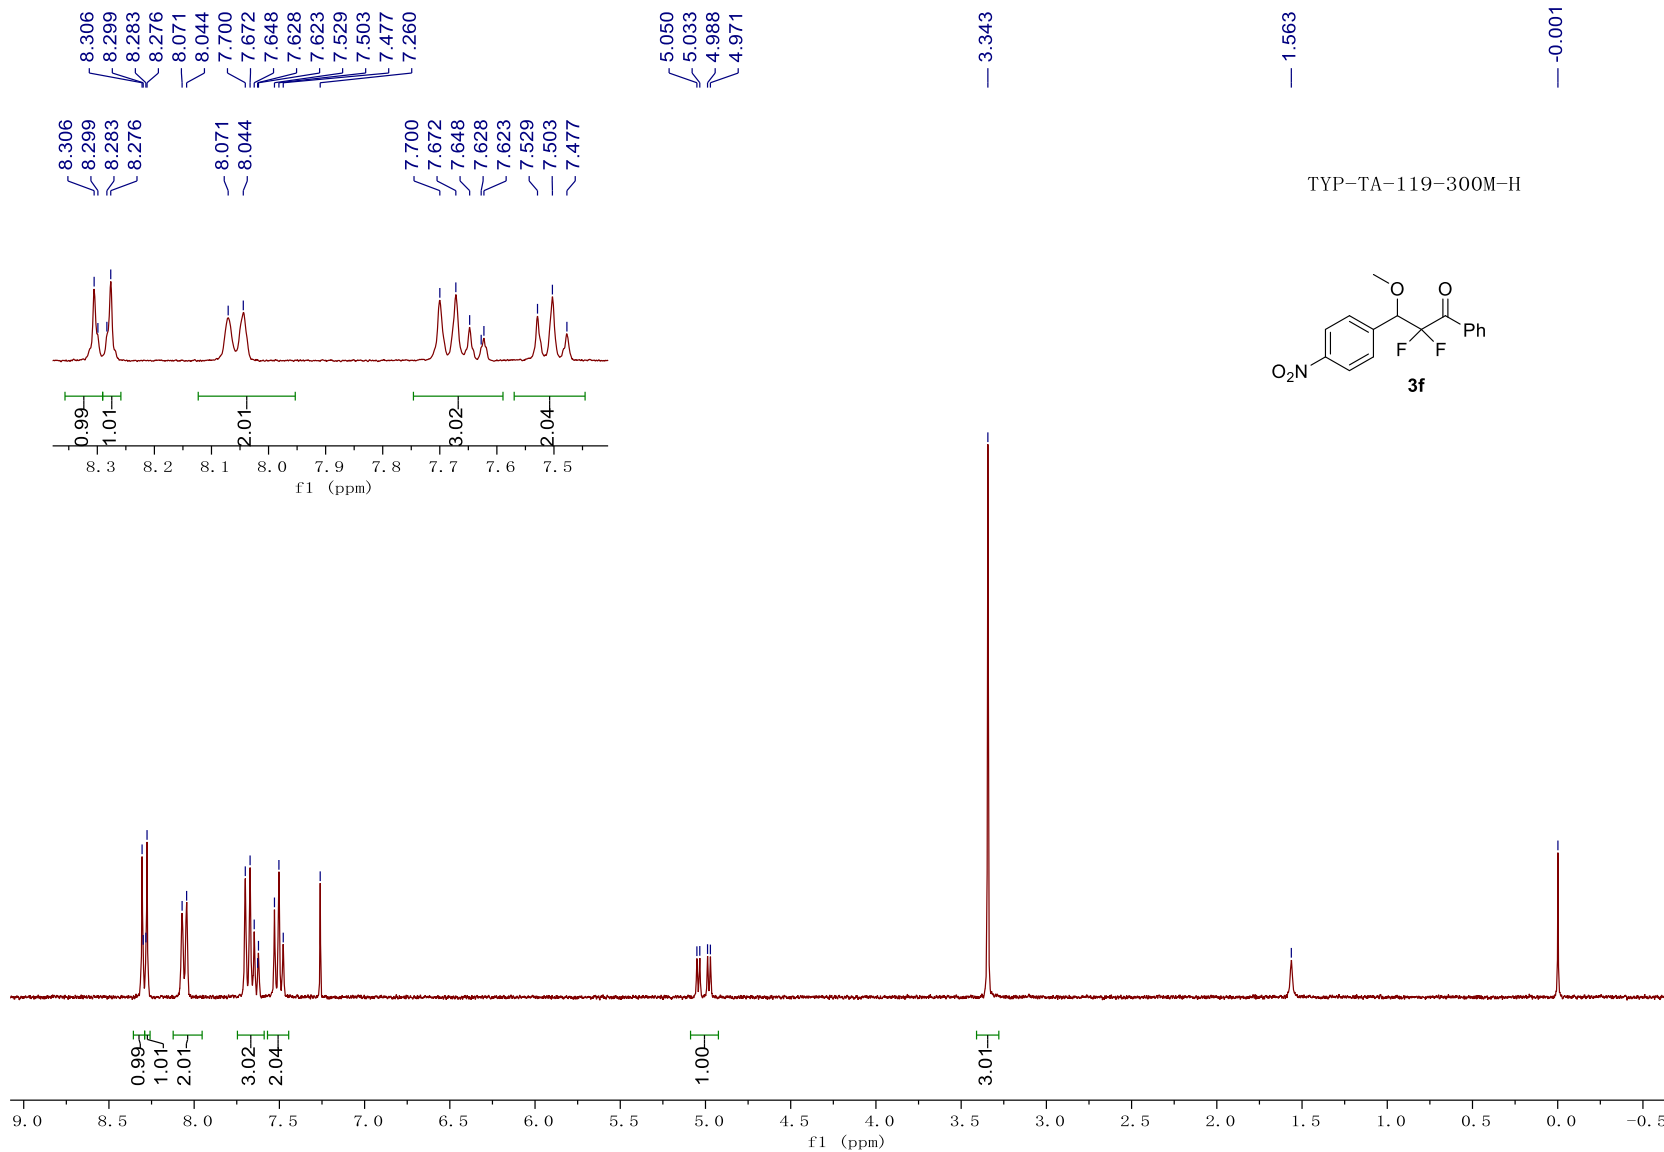

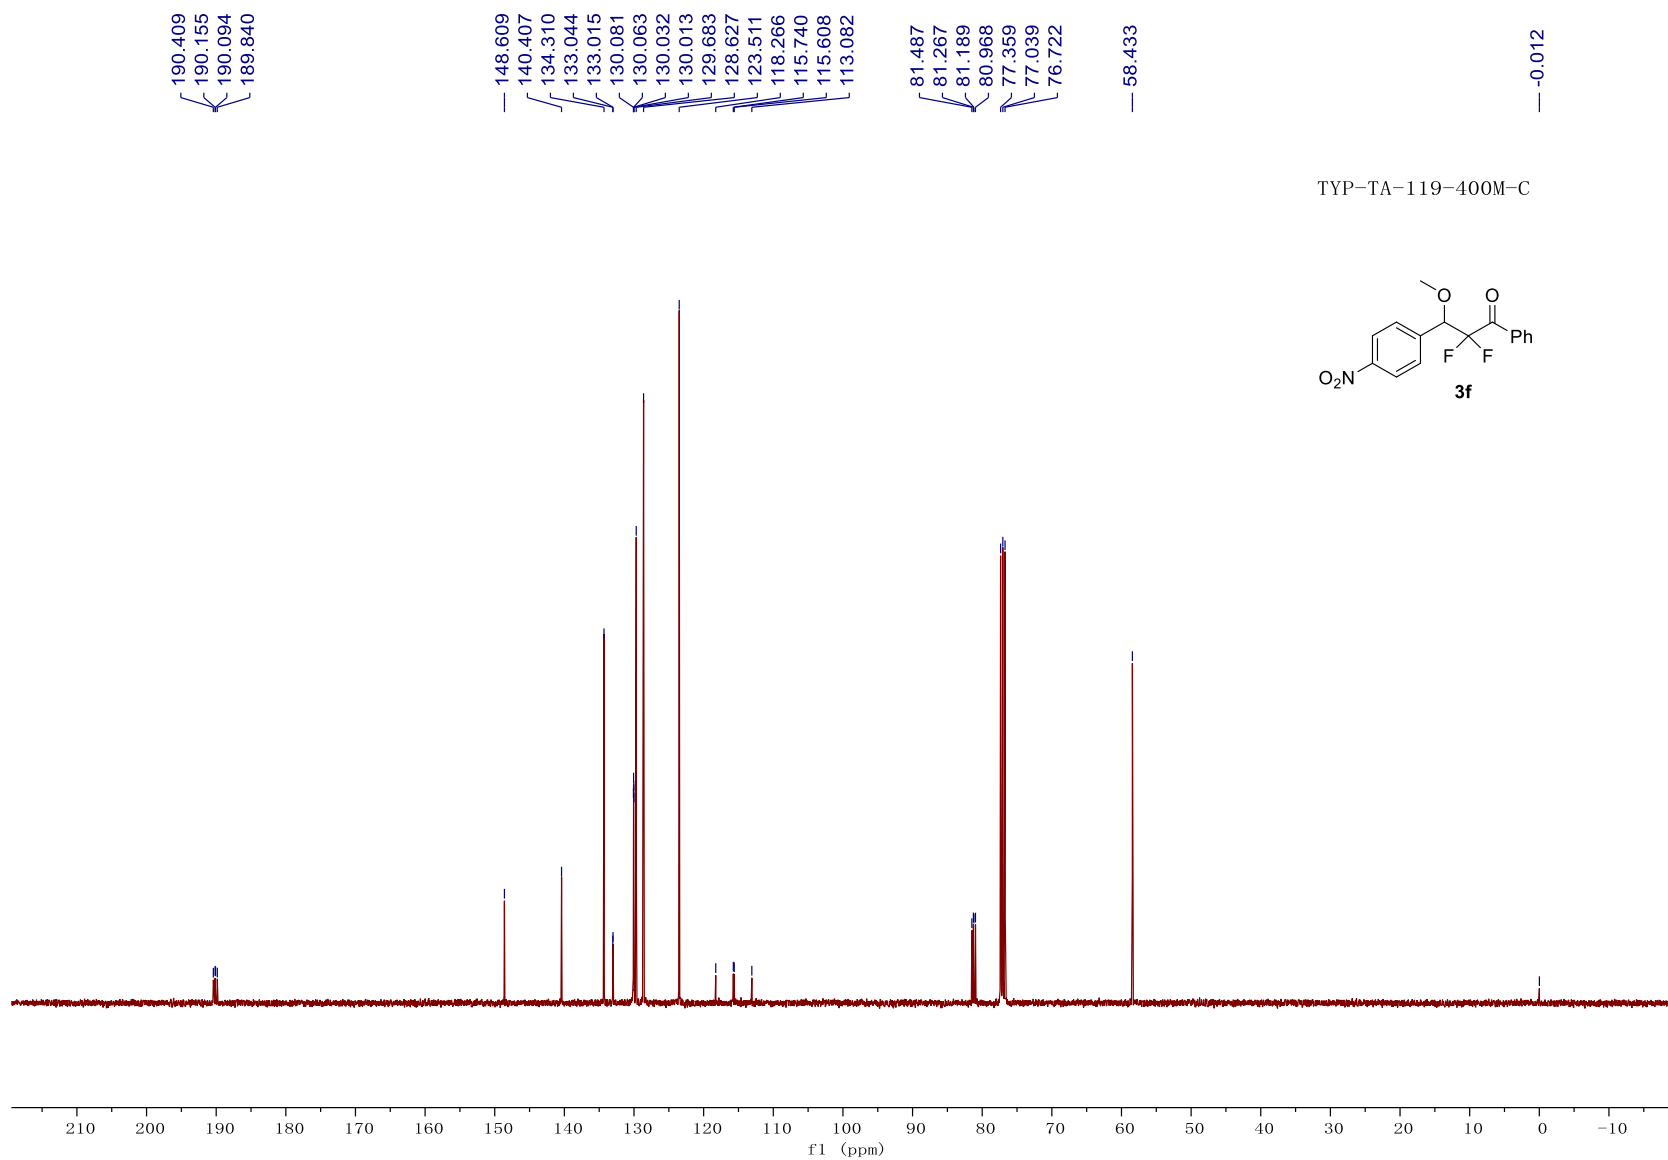

TYP-TA-119-400M-C

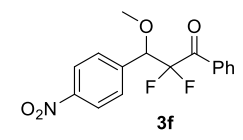



TYP-TA-119-300M-F

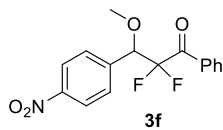

-102.413  
-102.424  
-103.404  
-103.418

-117.086  
-117.130  
-118.078  
-118.125

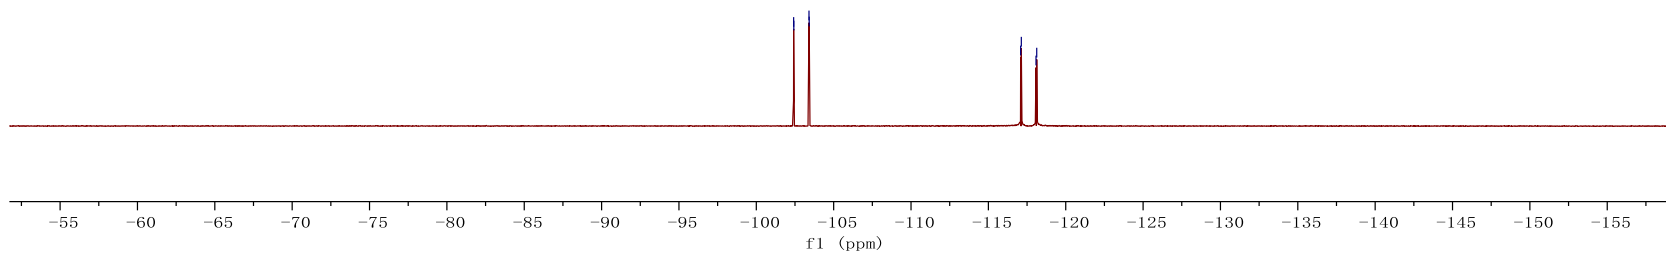

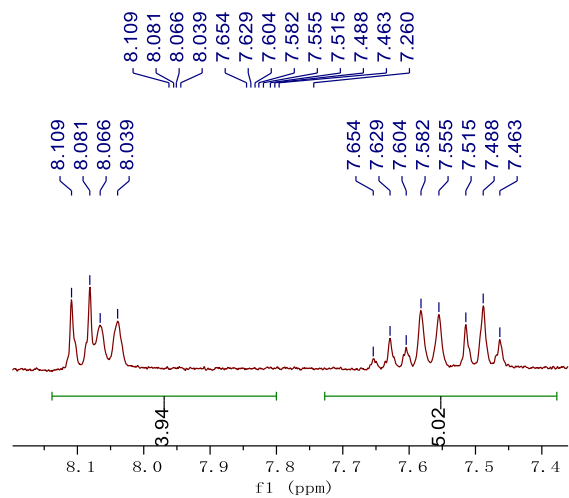

4.979  
4.961  
4.915  
4.898

— 3.937

— 3.307

— 1.566

— -0.001

TYP-TA-133-300M-H

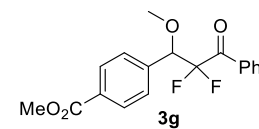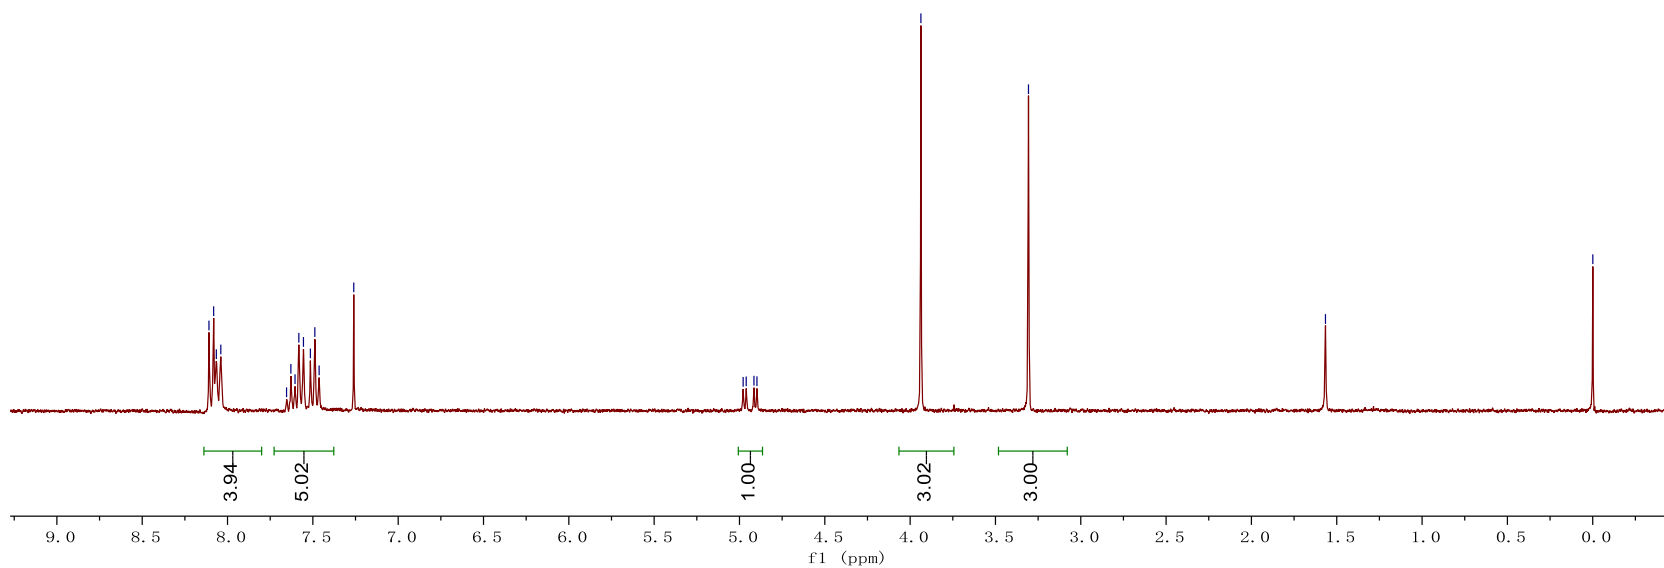

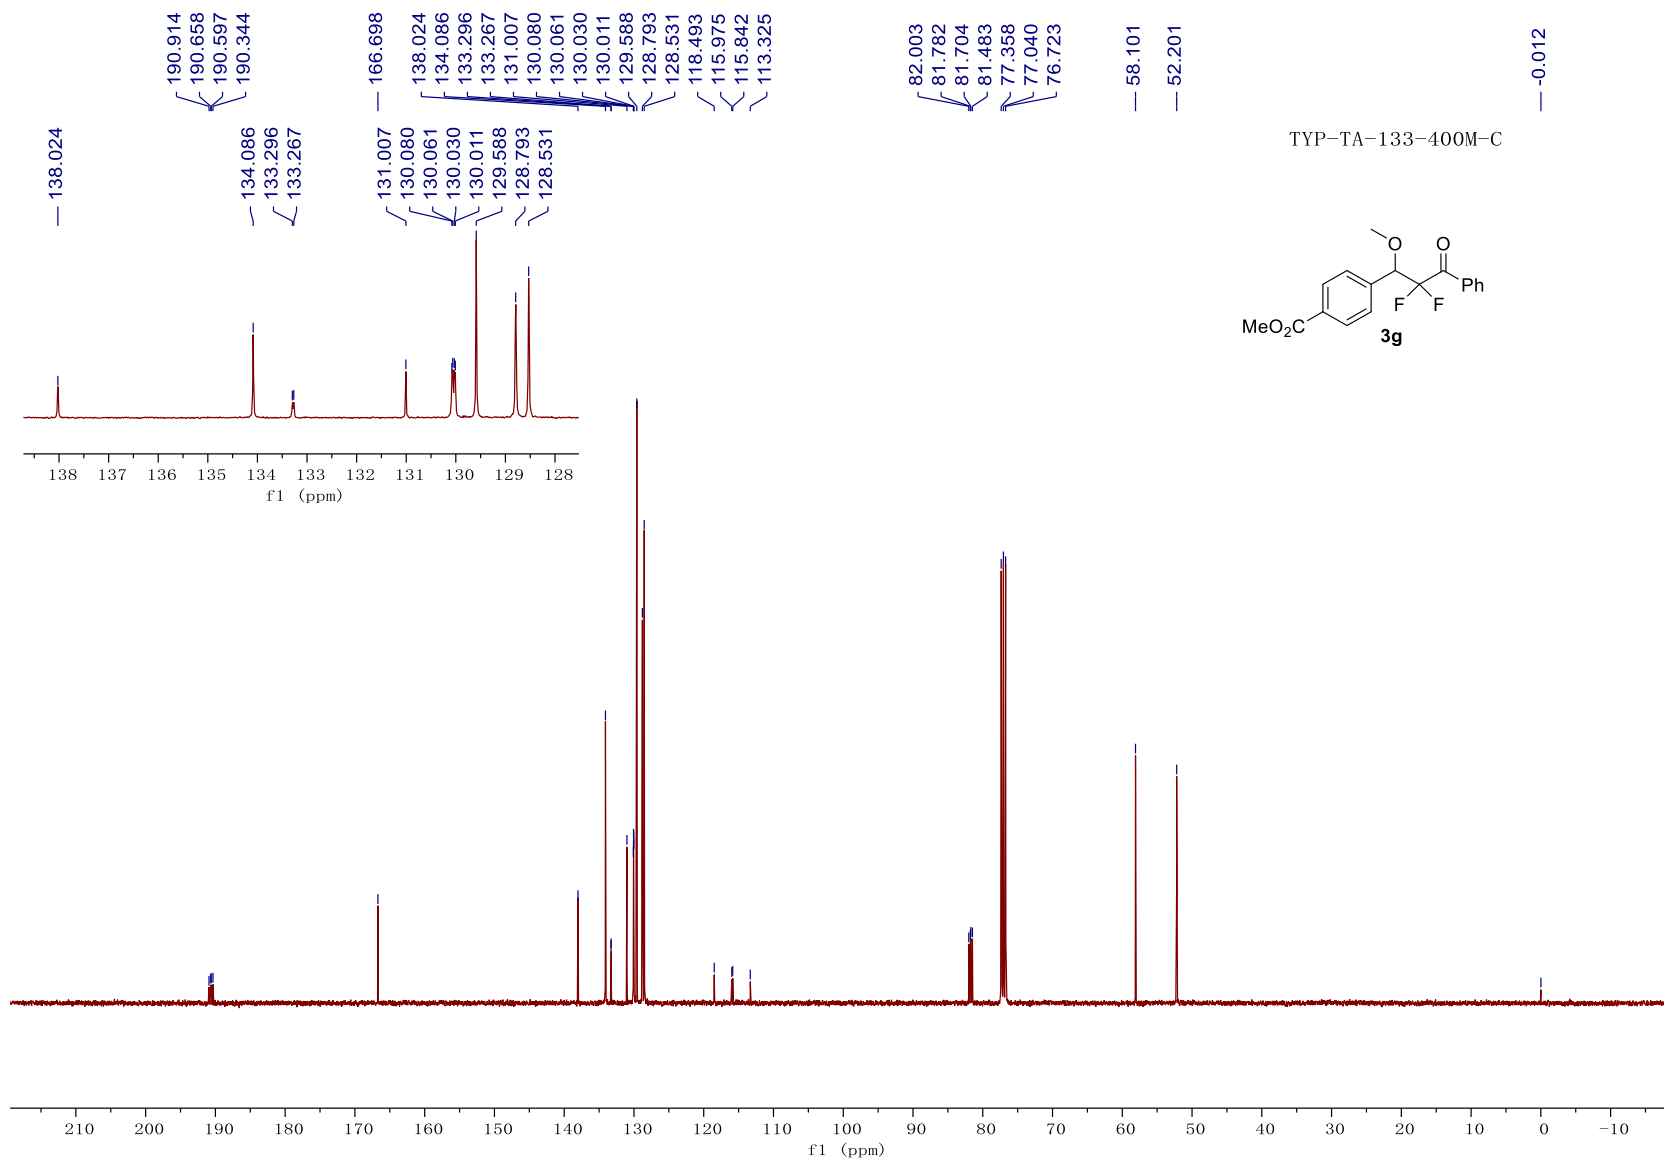

TYP-TA-133-300M-F

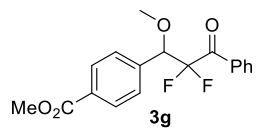

-102.952  
-102.969  
-103.932  
-103.951  
-117.200  
-117.255  
-118.180  
-118.237

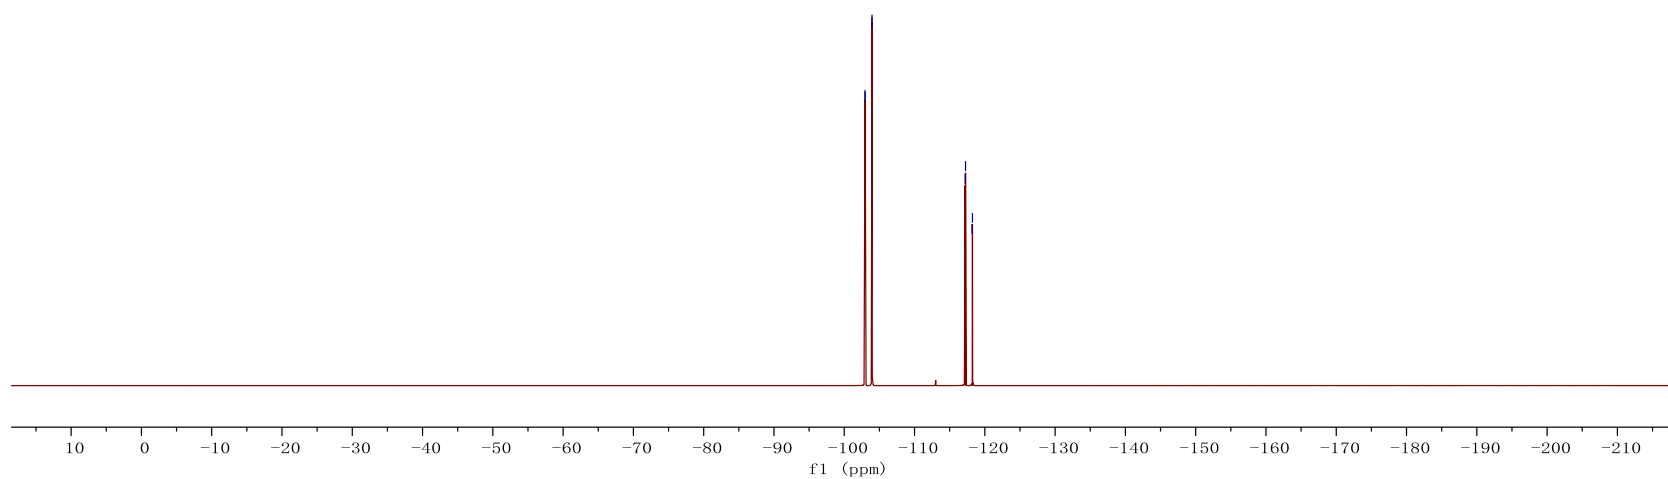

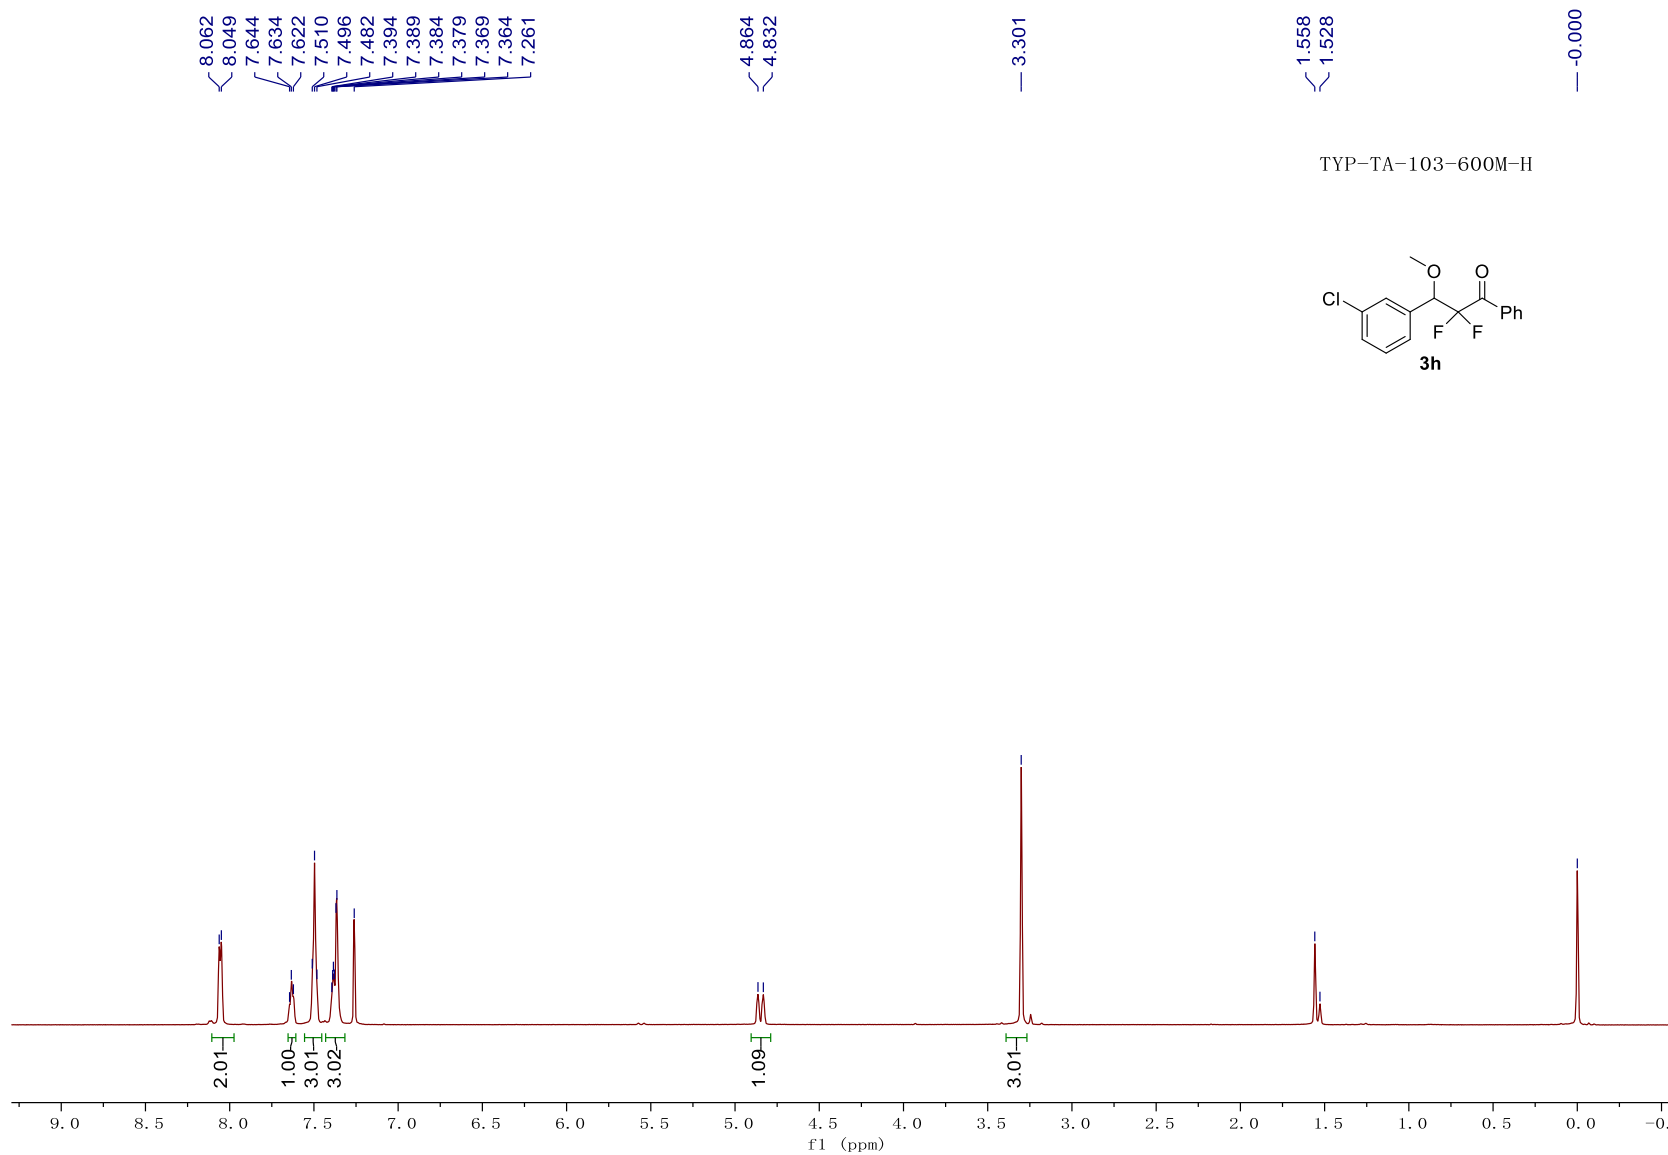

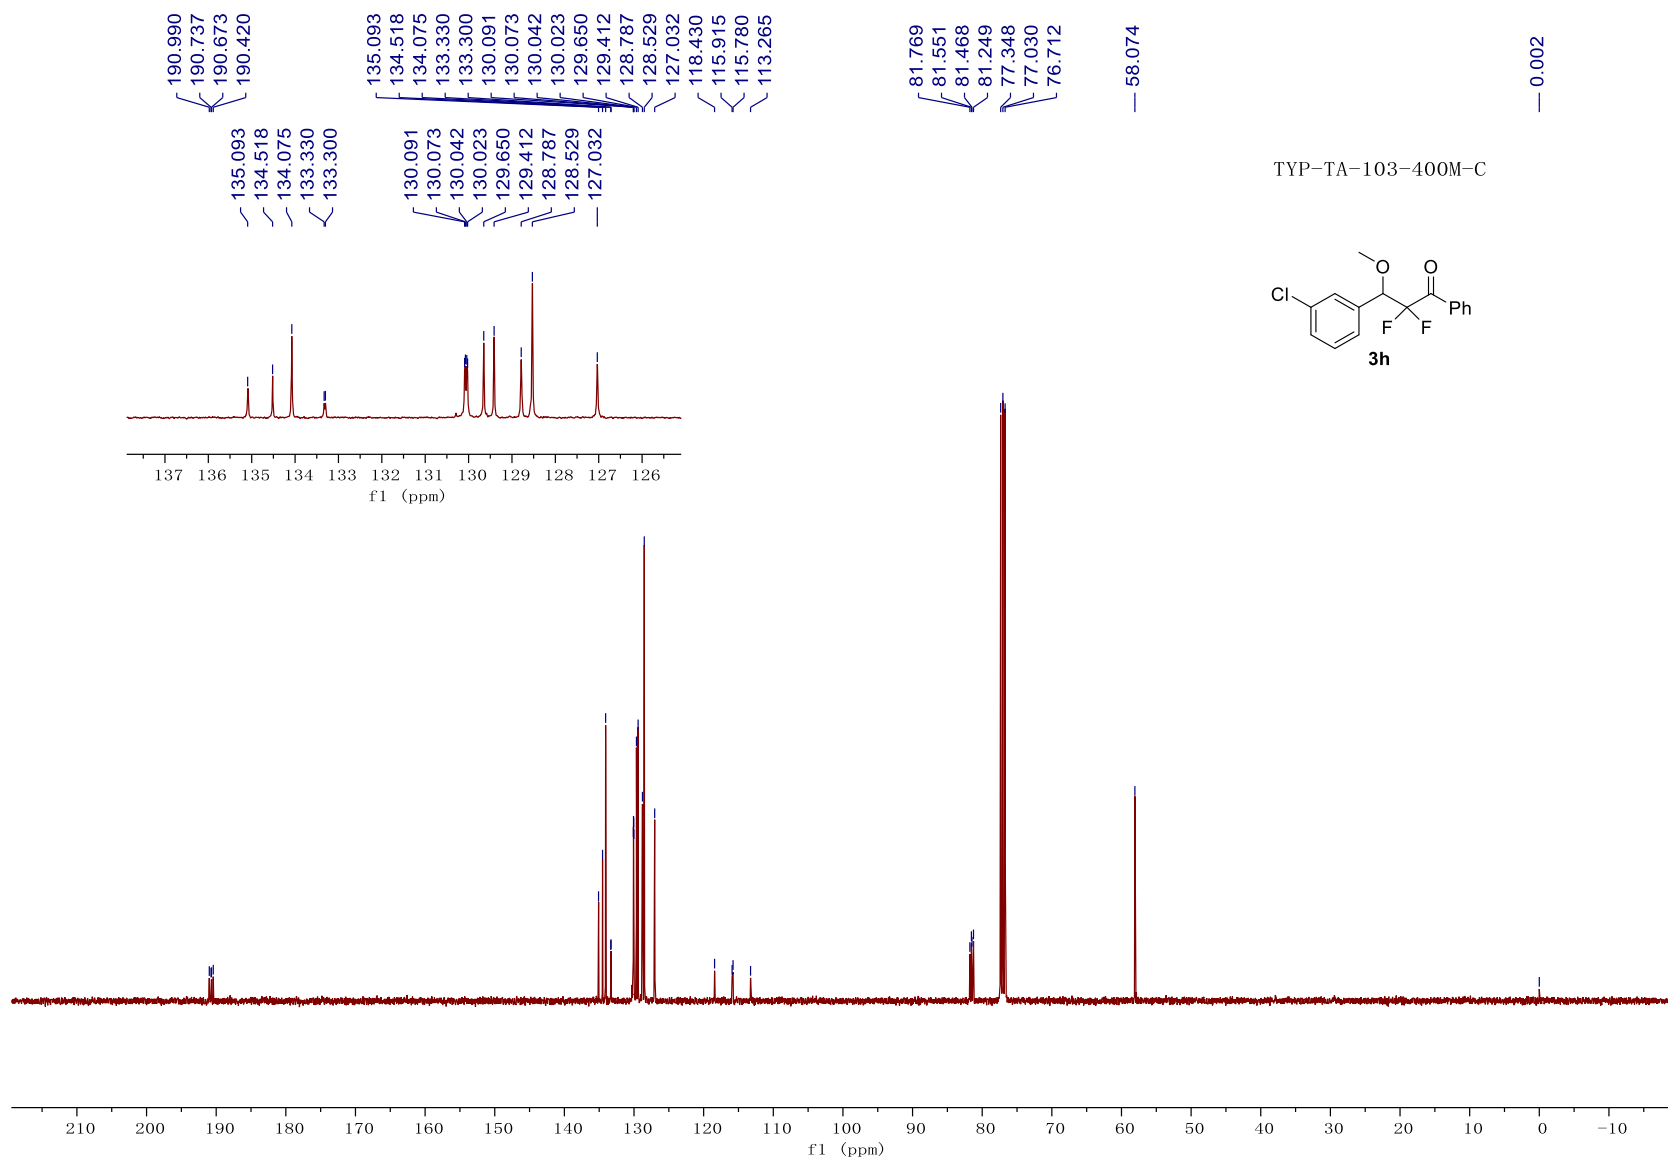

TYP-TA-103-400M-F

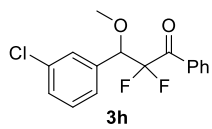

-102.997  
-103.732  
-117.702  
-118.438

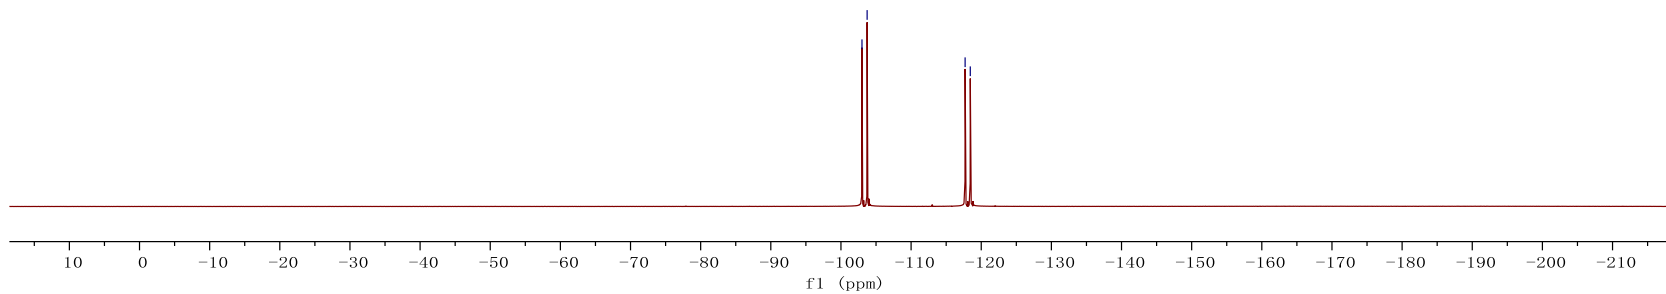

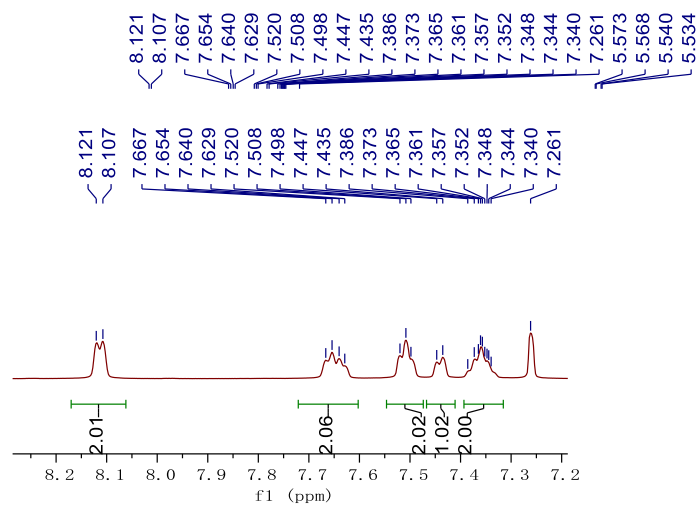

— 3.245

— 1.560  
— 1.529

— 0.000

TYP-TA-105-600M-H

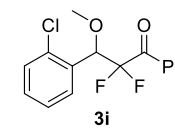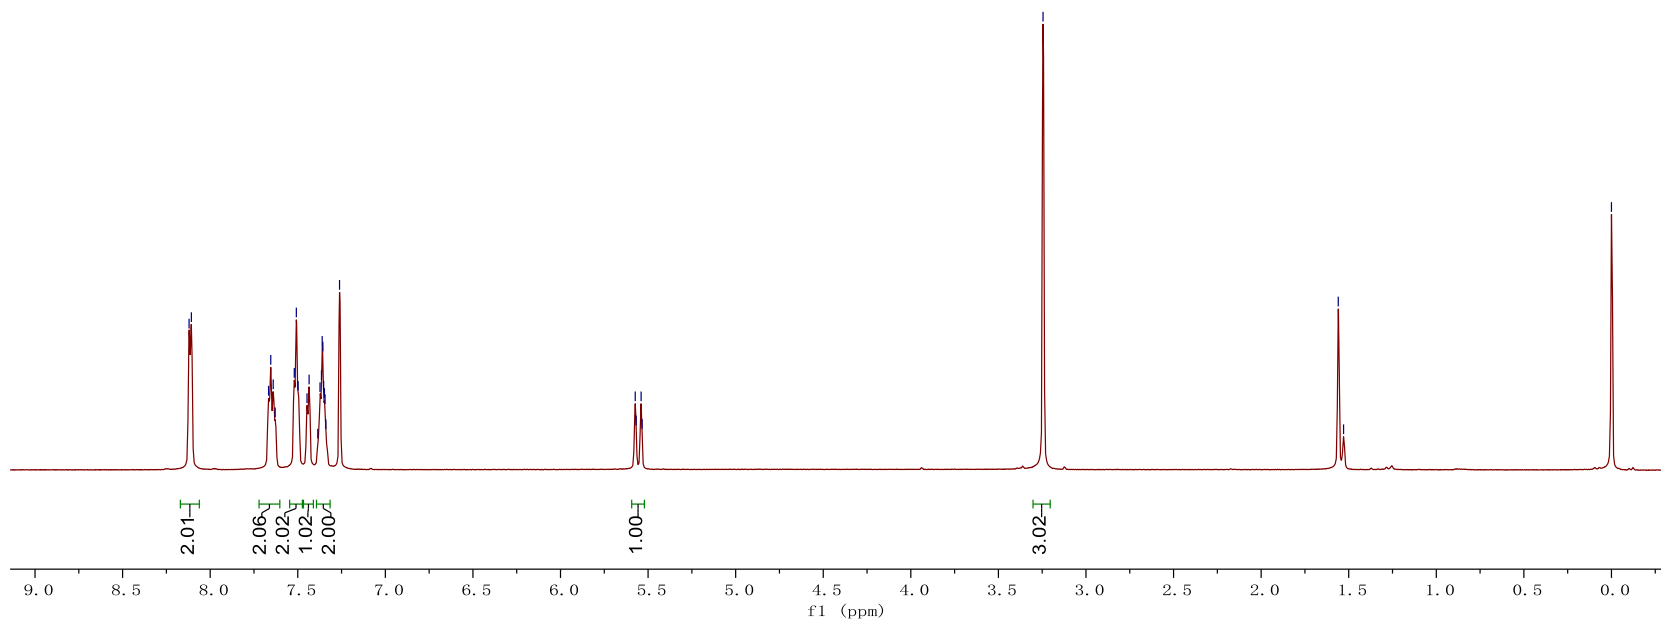



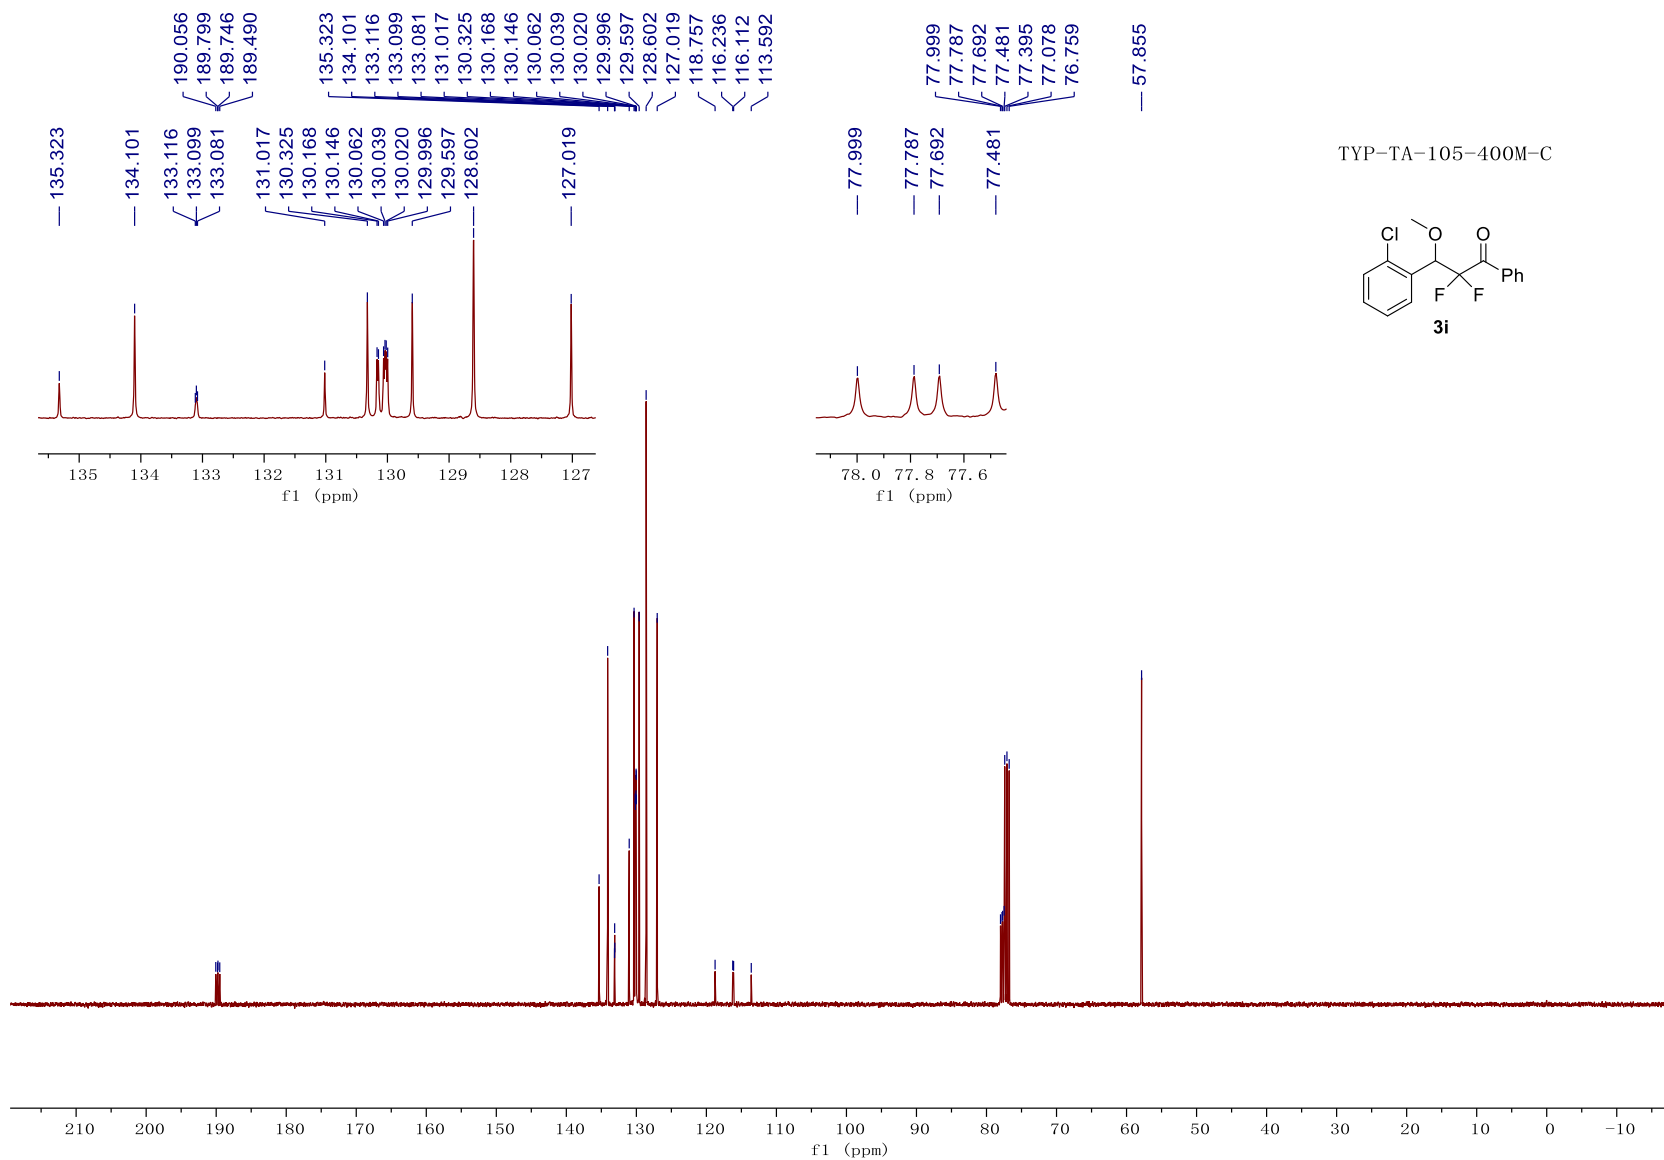

TYP-TA-105-400M-F

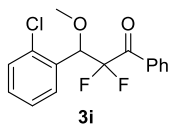

-103.264  
-104.004

-118.088  
-118.829

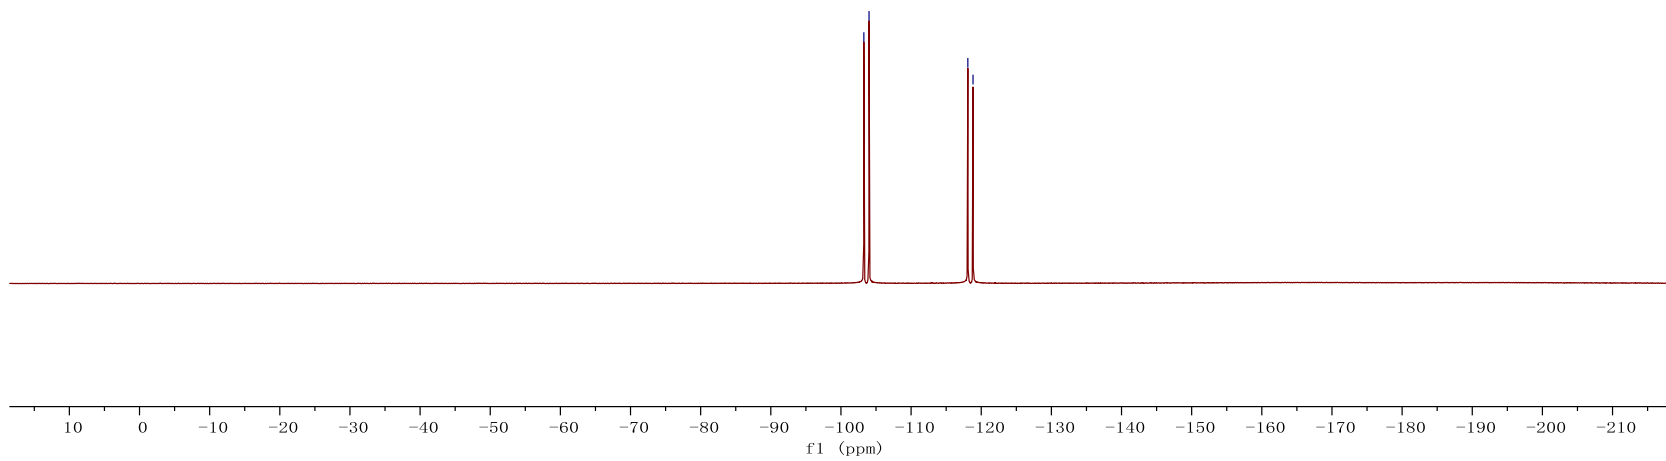

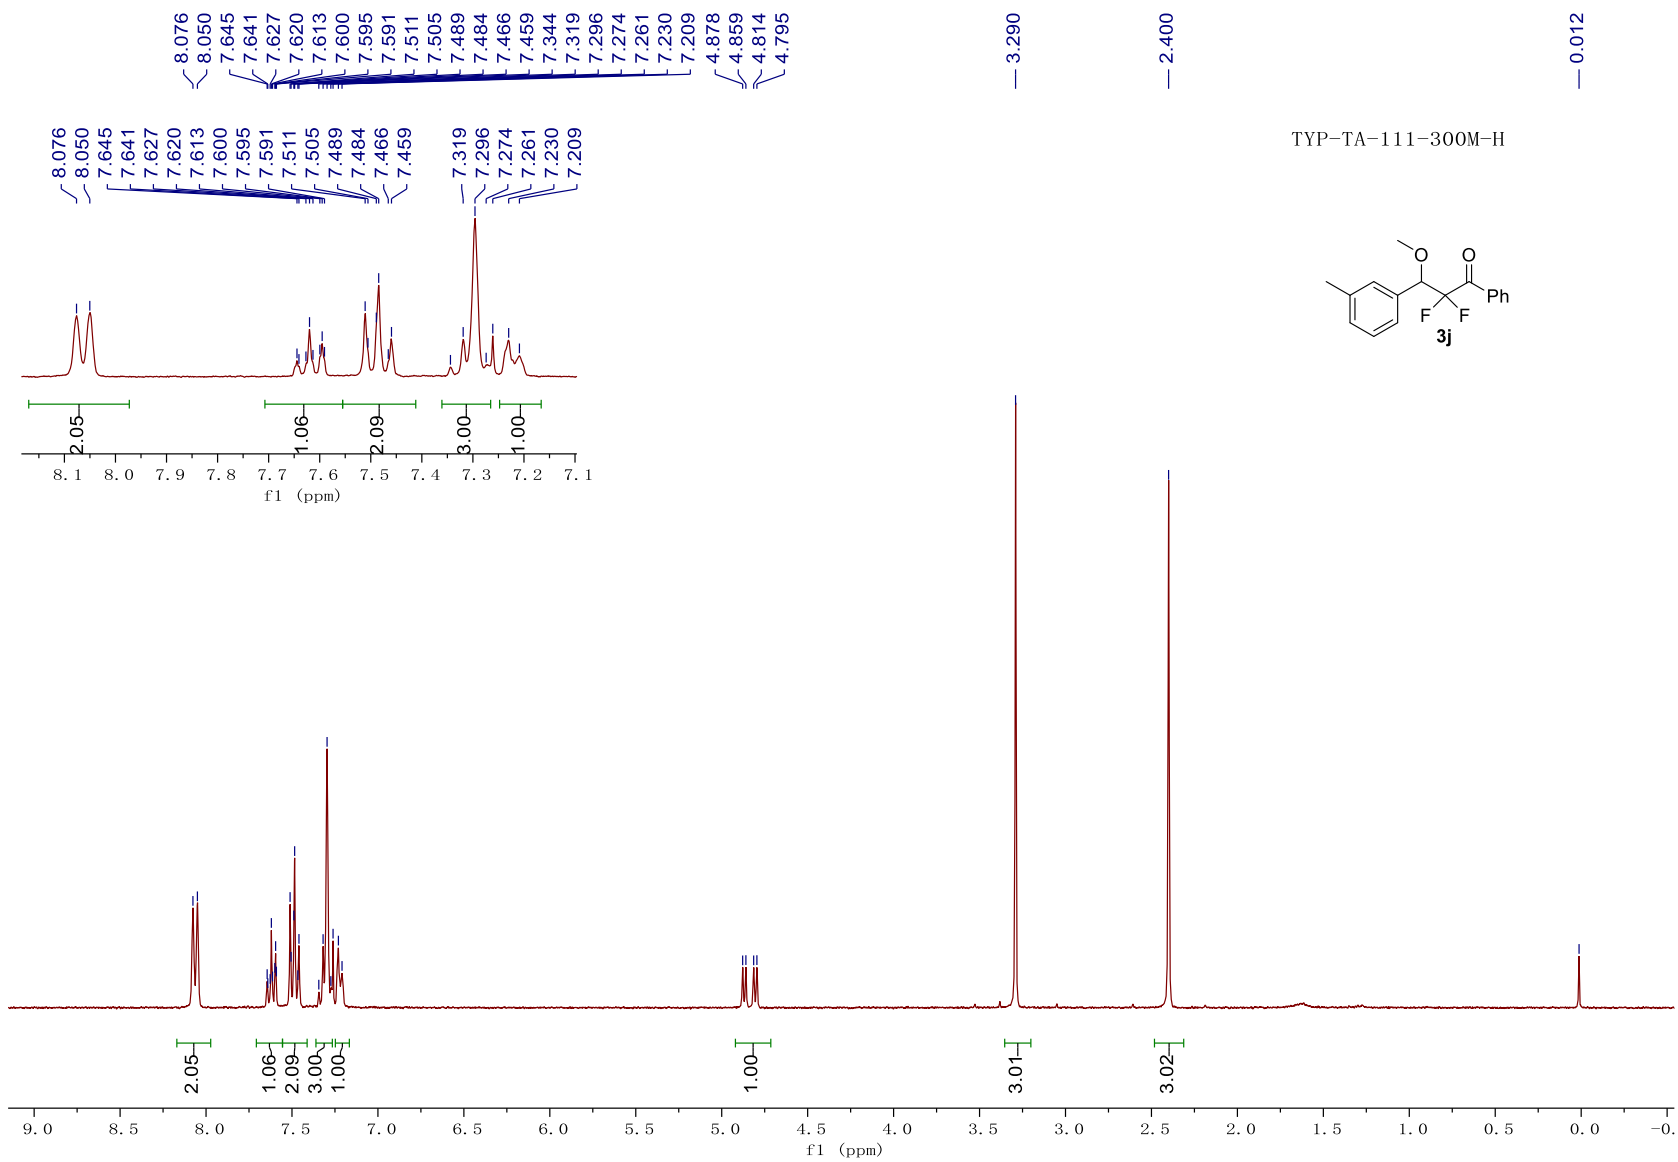

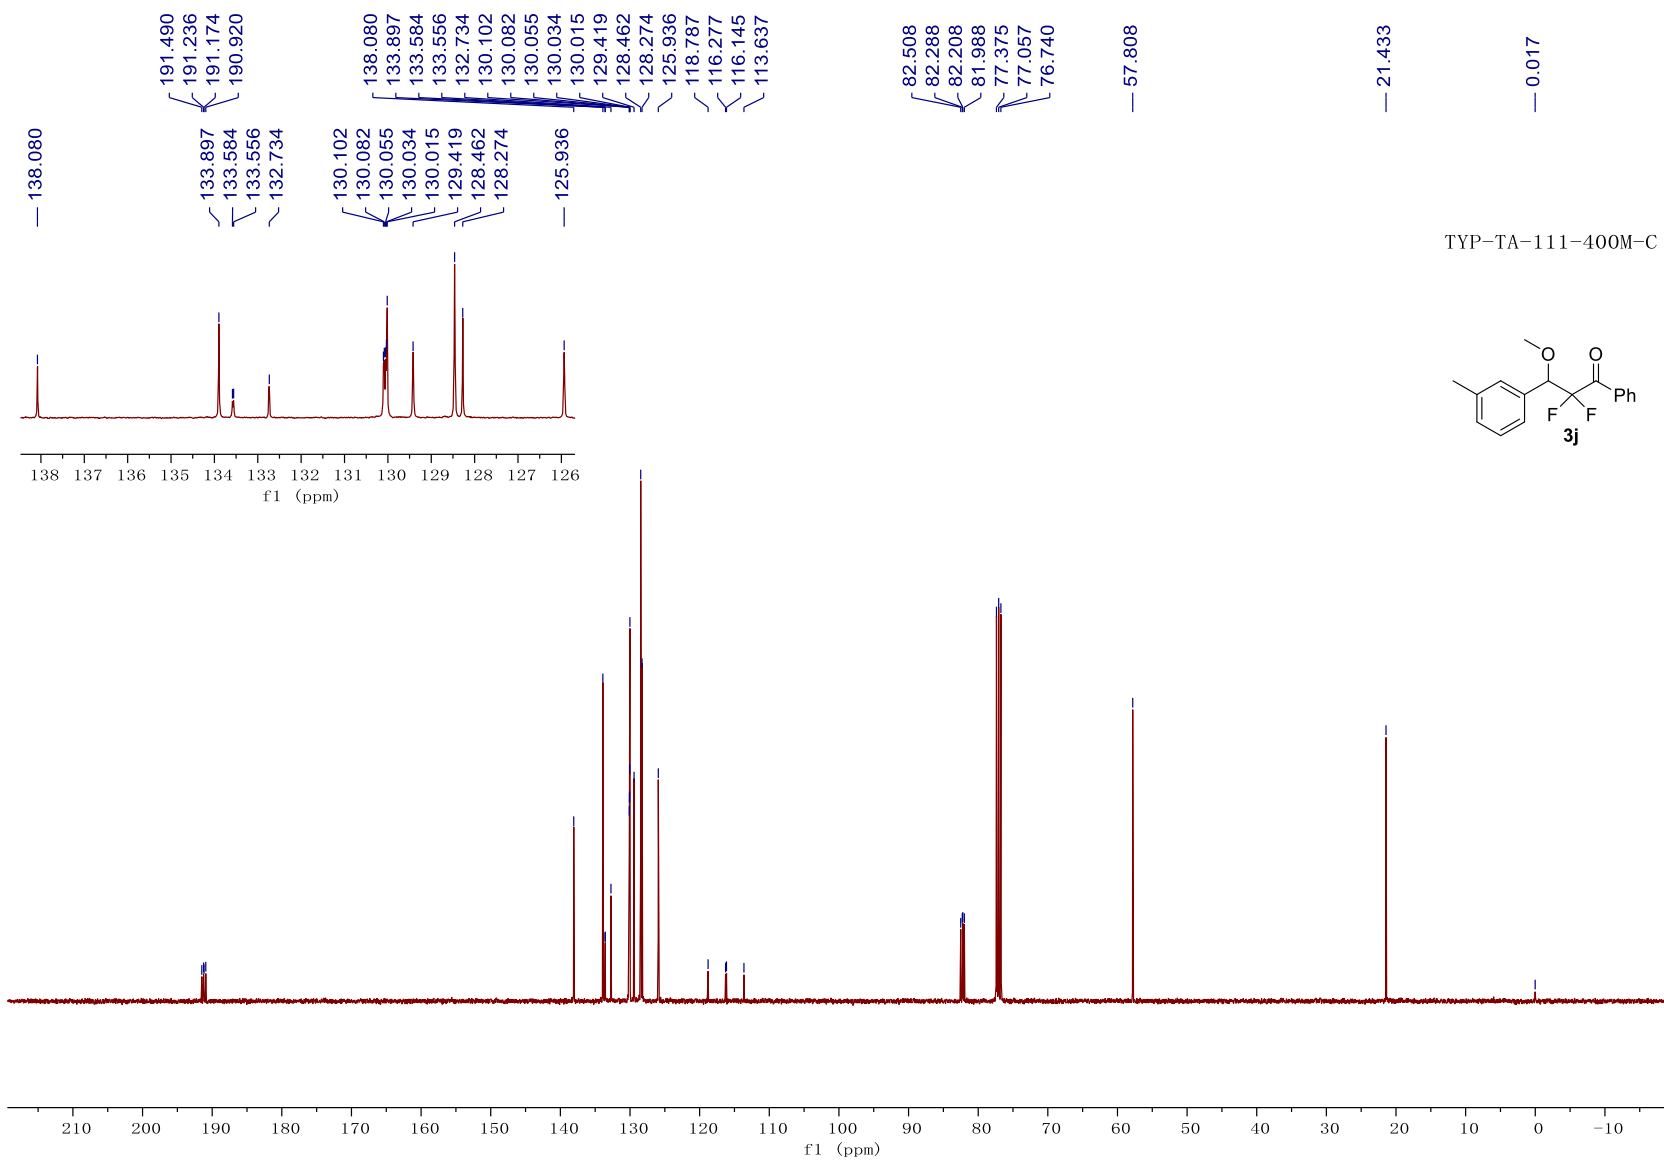

TYP-TA-111-400M-C

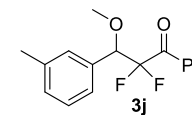

TYP-TA-111-300M-F

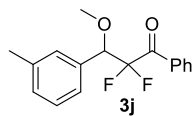

-103.313  
-103.334  
-104.280  
-104.302

-117.355  
-117.417  
-118.322  
-118.385

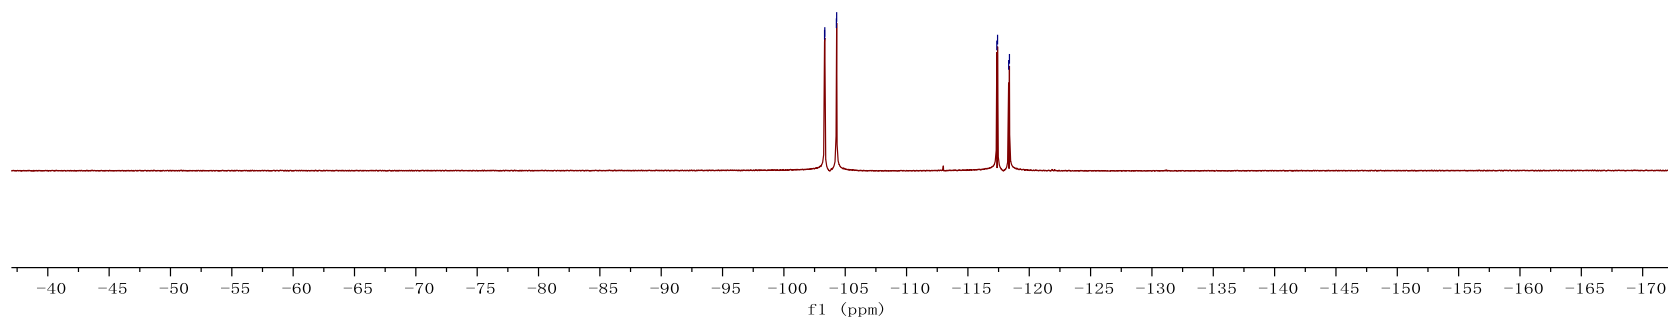

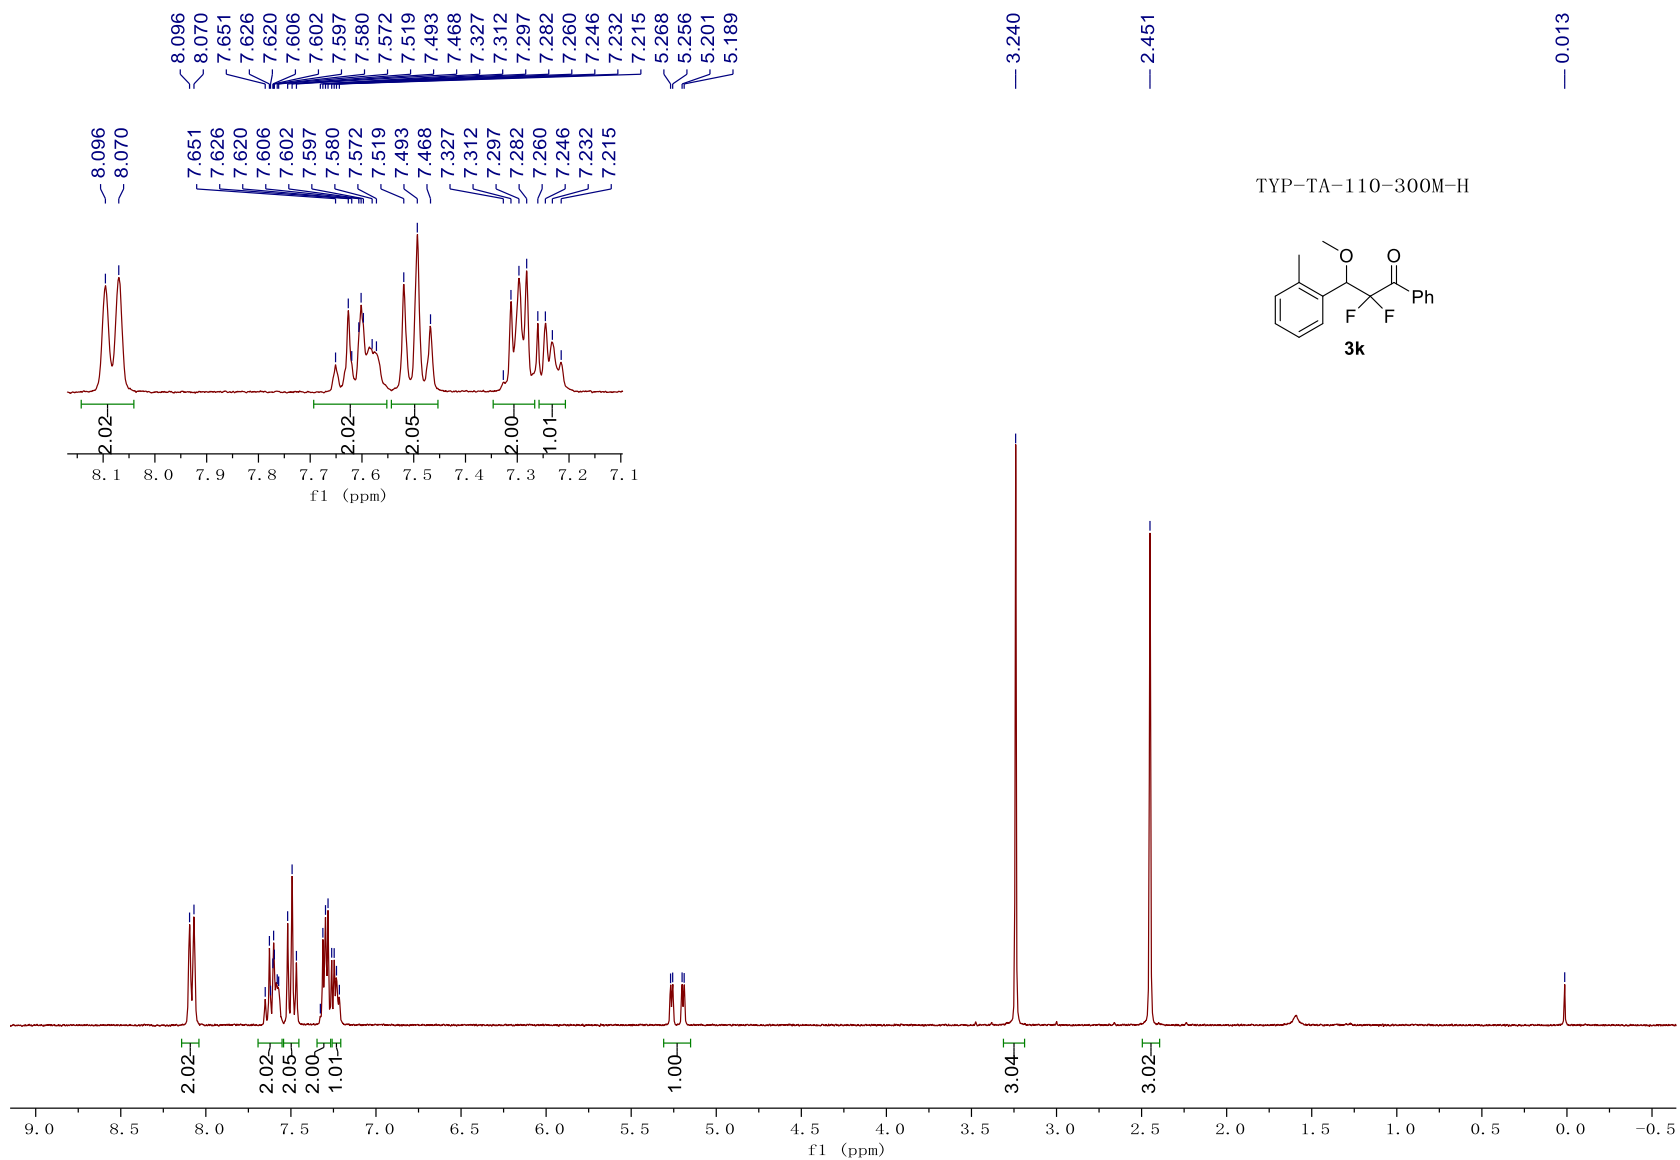

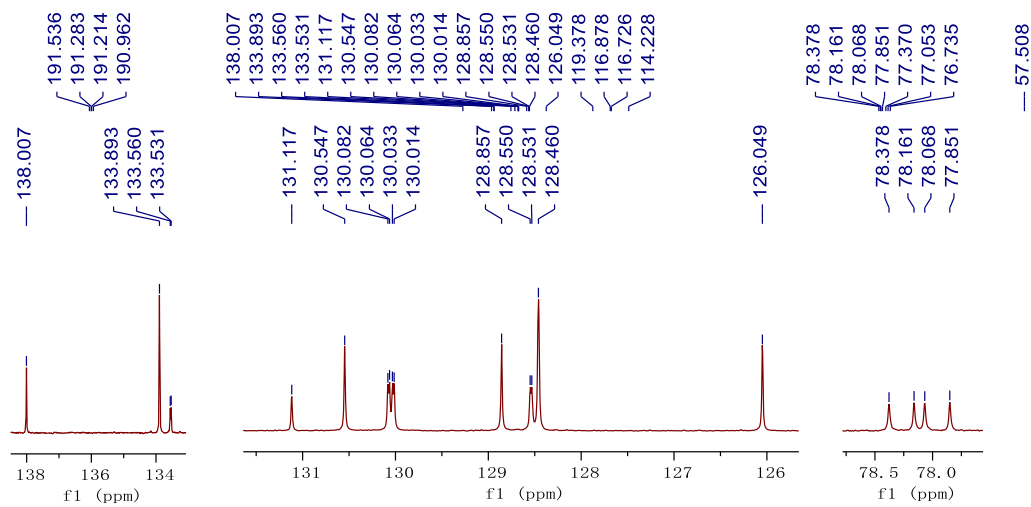

19.538  
19.506  
-0.001

TYP-TA-110-400M-C

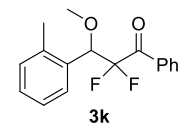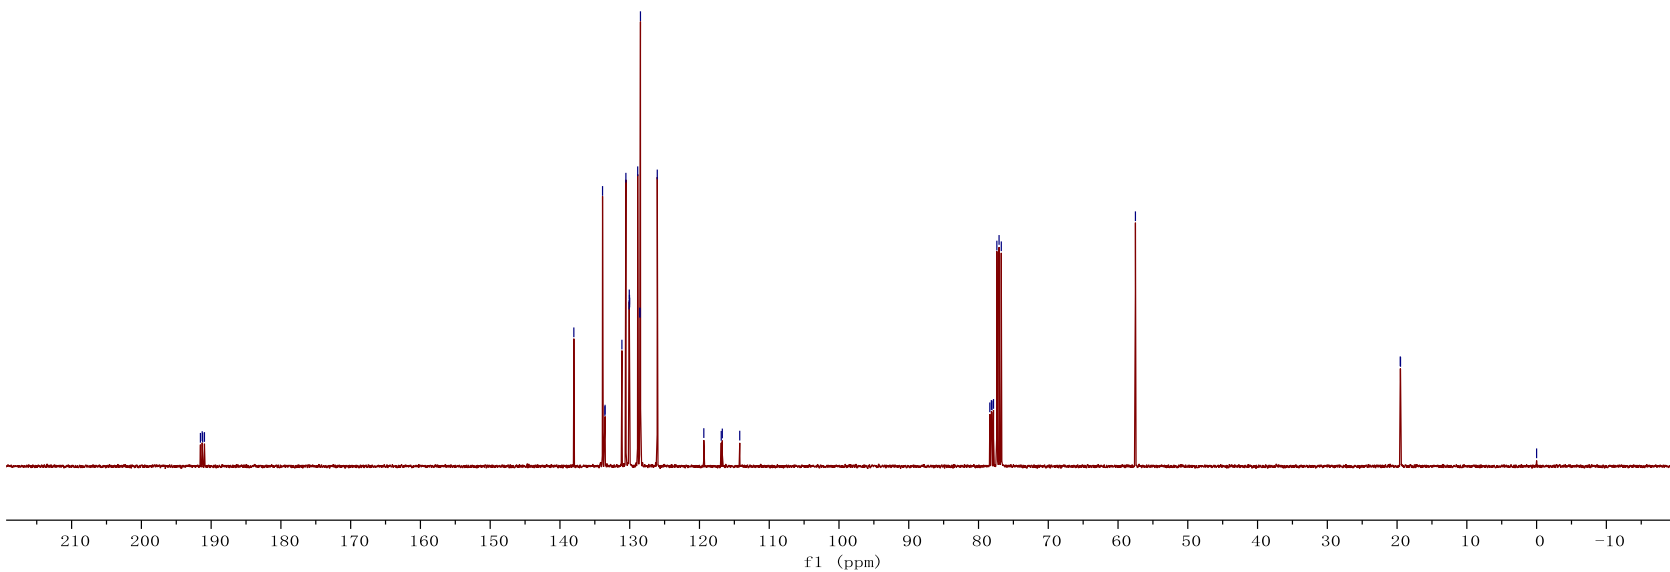

TYP-TA-110-300M-F

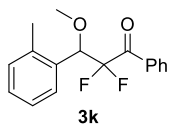

-102.918  
-102.930  
-103.894  
-103.901  
-117.569  
-117.611  
-118.546  
-118.586

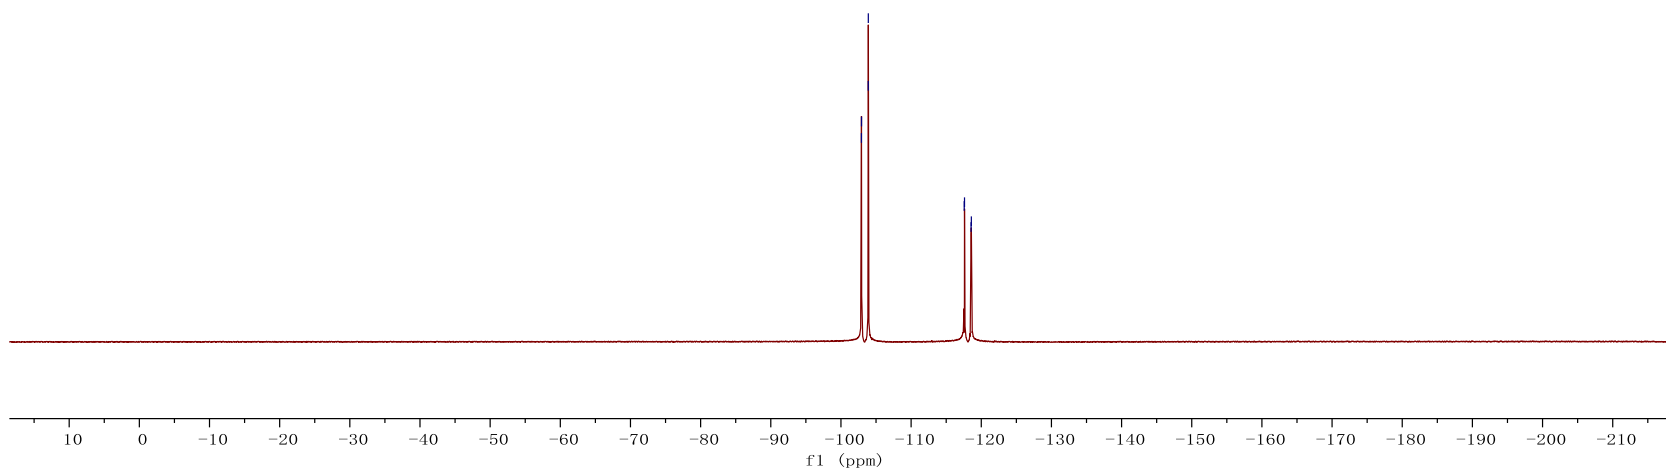



8.107  
8.080  
7.960  
7.926  
7.911  
7.898  
7.889  
7.879  
7.867  
7.855  
7.650  
7.638  
7.626  
7.608  
7.601  
7.597  
7.557  
7.534  
7.545  
7.524  
7.519  
7.513  
7.497  
7.492  
7.468  
7.465  
7.260  
5.093  
5.074  
5.010

8.095  
8.068  
7.948  
7.914  
7.899  
7.886  
7.877  
7.867  
7.855  
7.638  
7.626  
7.614  
7.596  
7.589  
7.585  
7.533  
7.522  
7.512  
7.507  
7.501  
7.485  
7.480  
7.456  
7.453

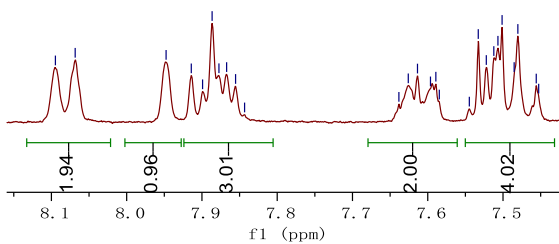

3.337

1.564

0.012

TYP-TA-121-300M-H

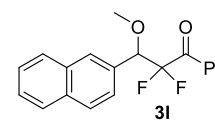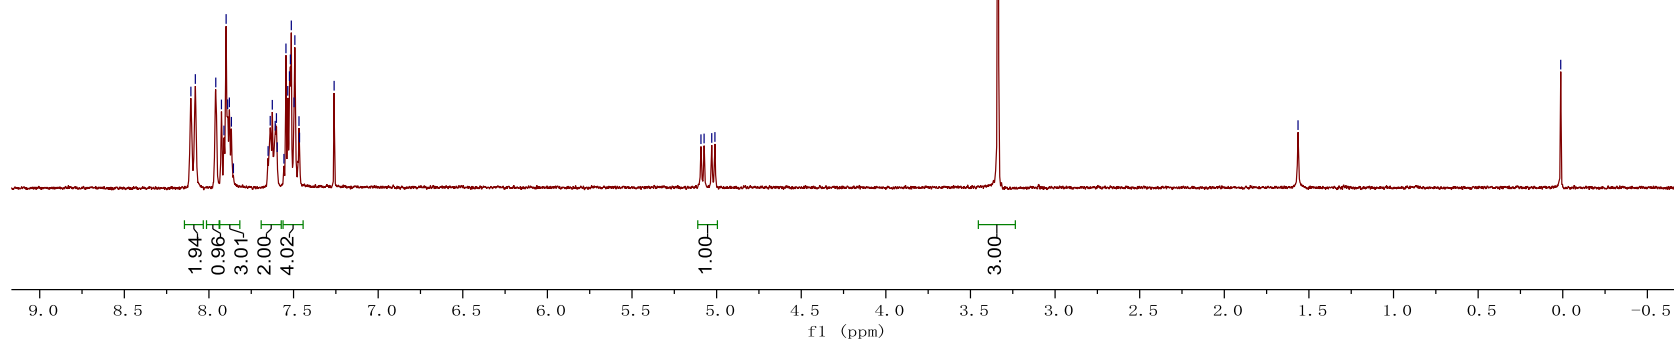

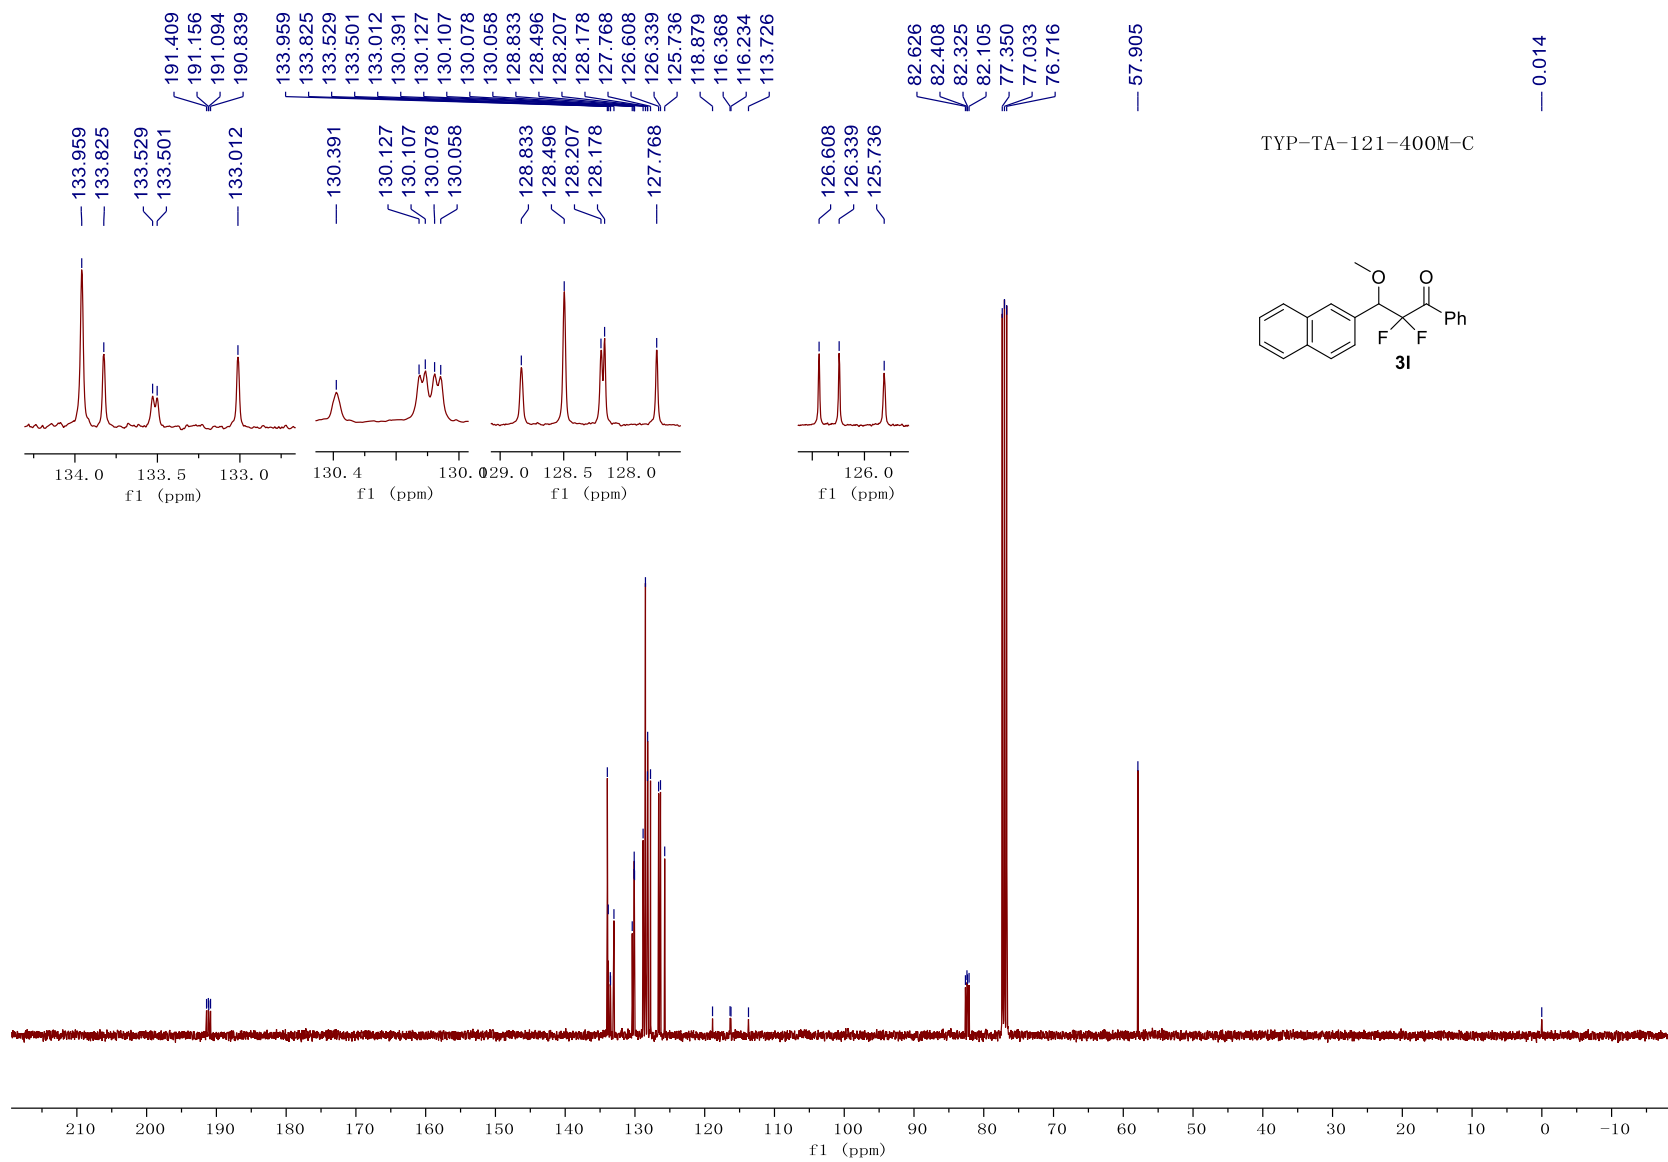

TYP-TA-121-300M-F

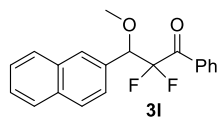

-102.975  
-102.982  
-103.945  
-103.957  
-117.098  
-117.133  
-118.069  
-118.109

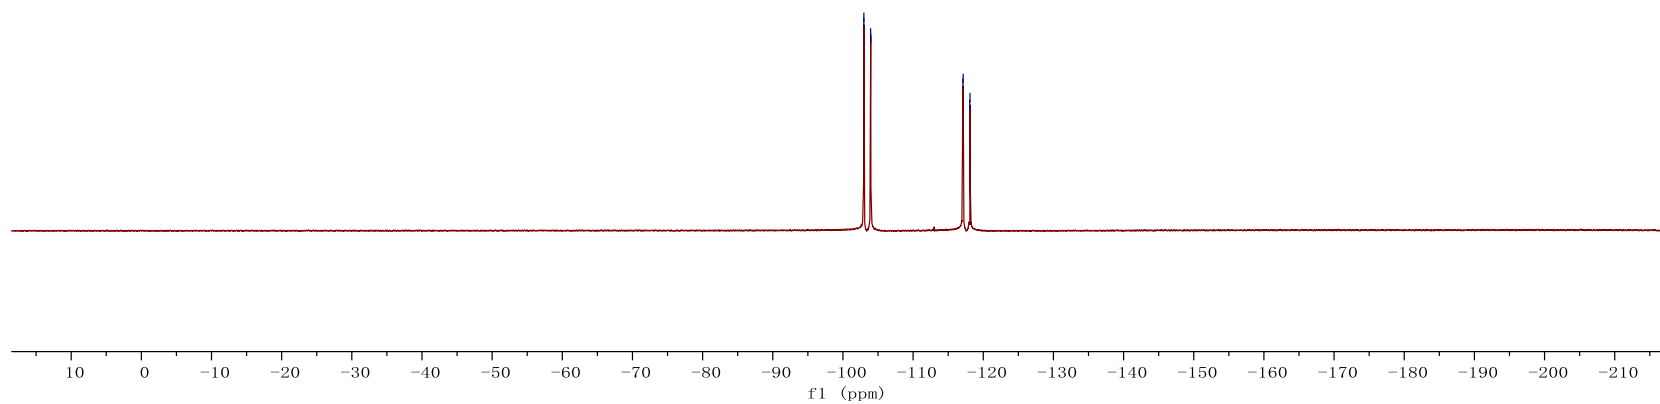

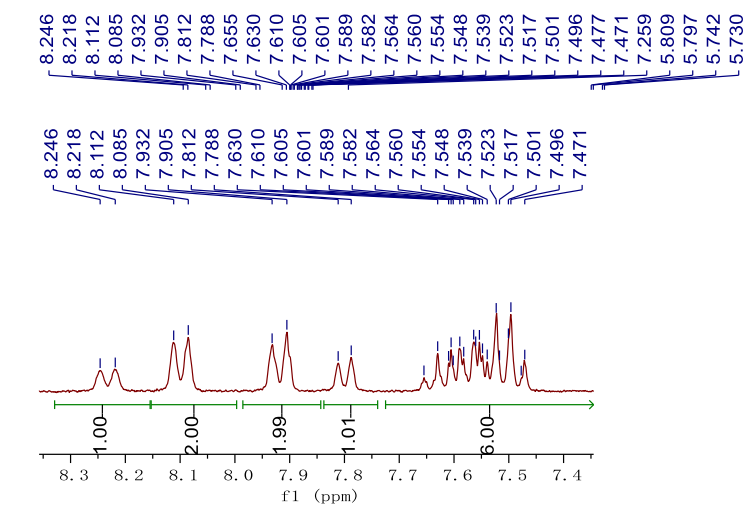

— 3.306

— 1.558

— 0.008

TYP-TA-123-300M-H

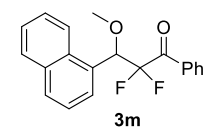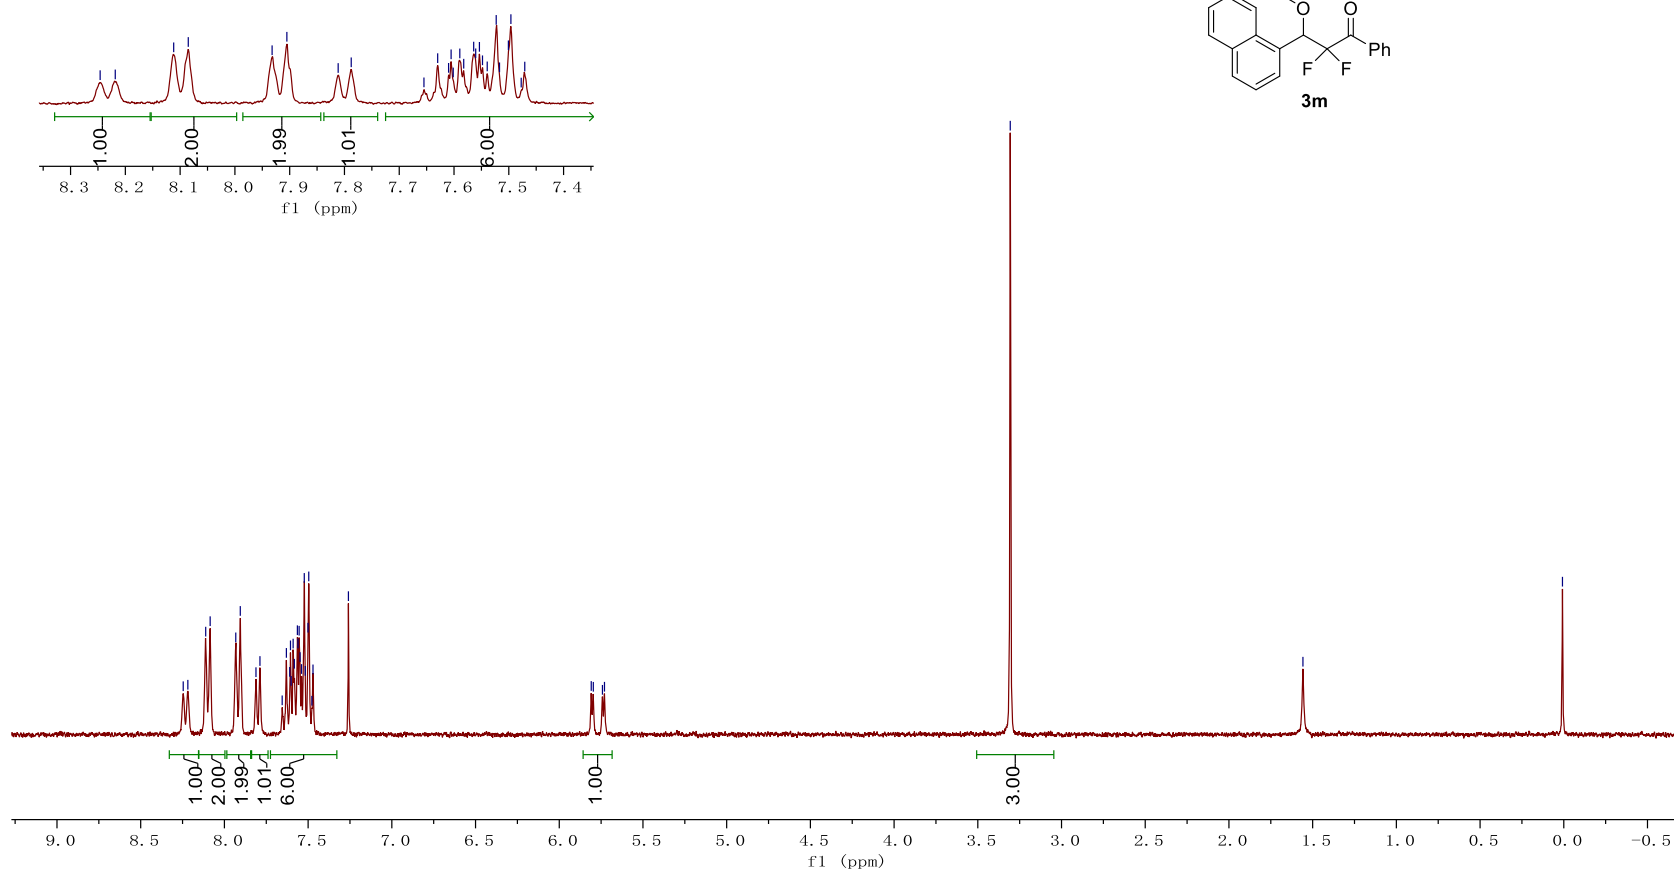

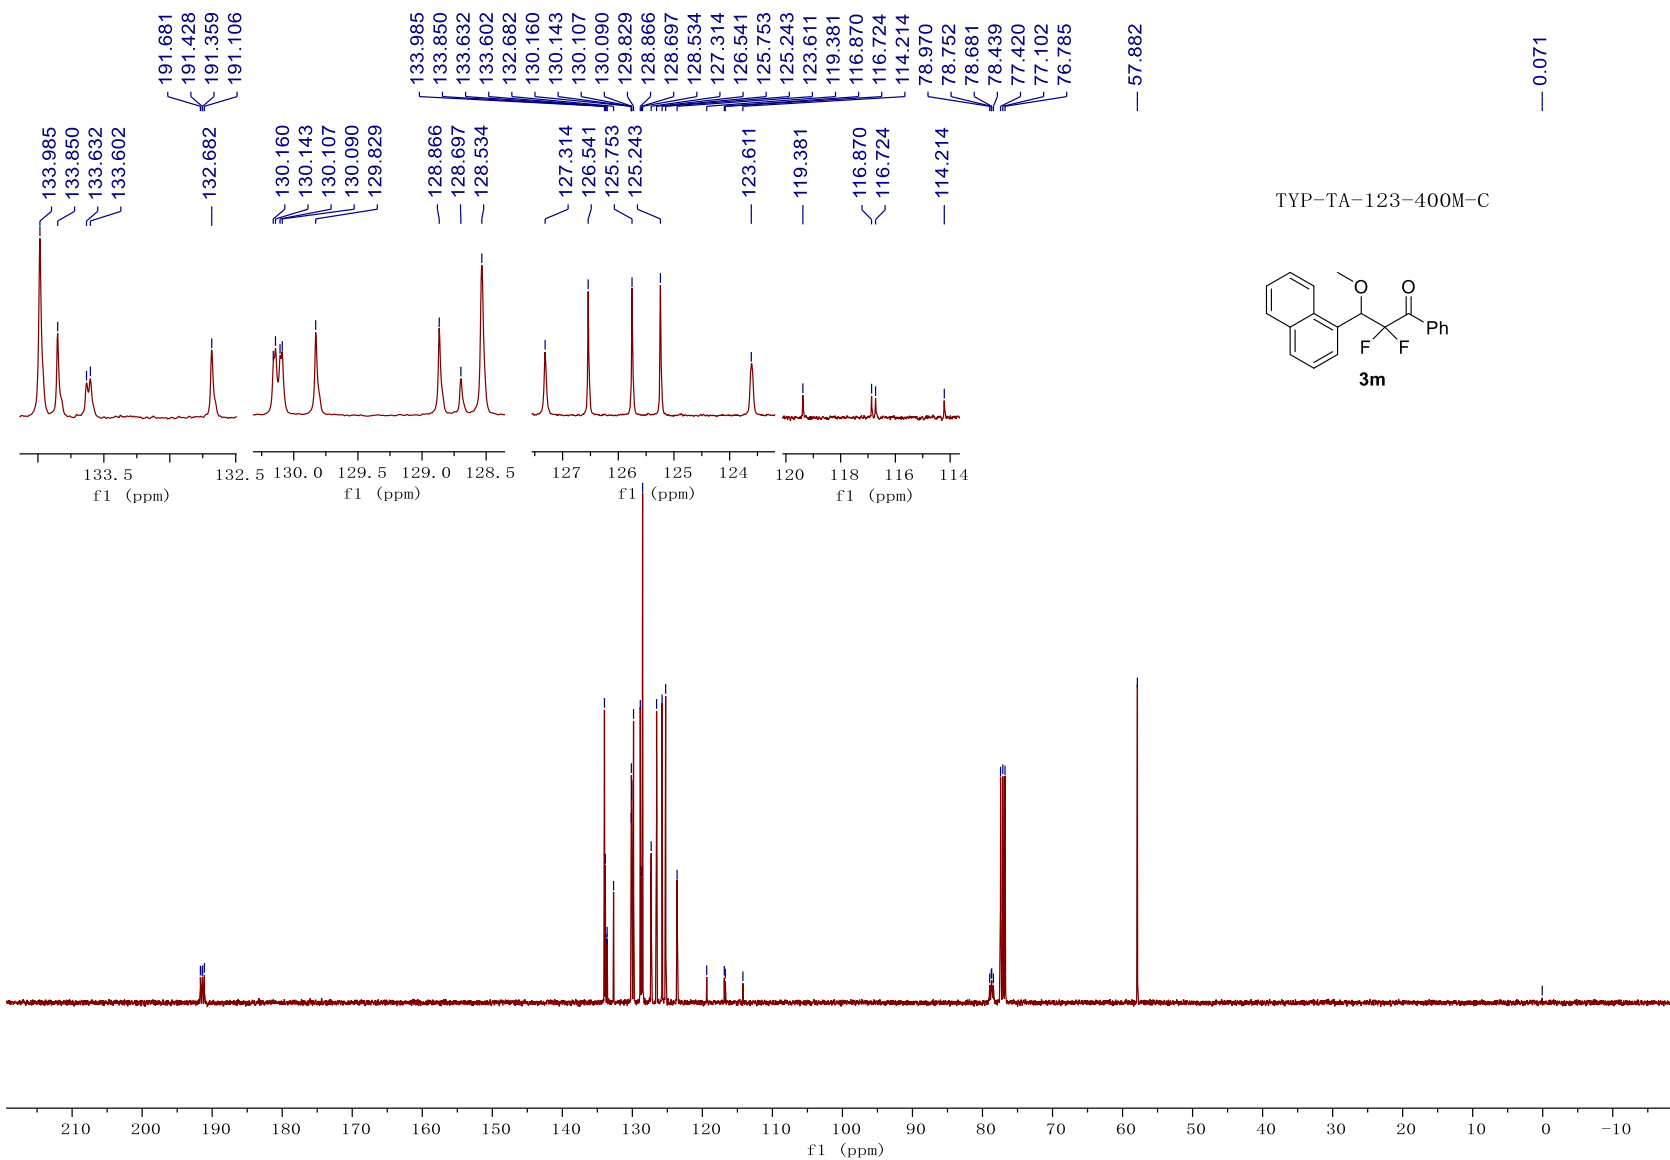

TYP-TA-123-300M-F

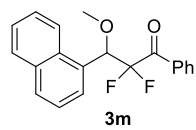

-101.557  
-101.567  
-102.530  
-102.543  
-117.244  
-117.303  
-118.227  
-118.285

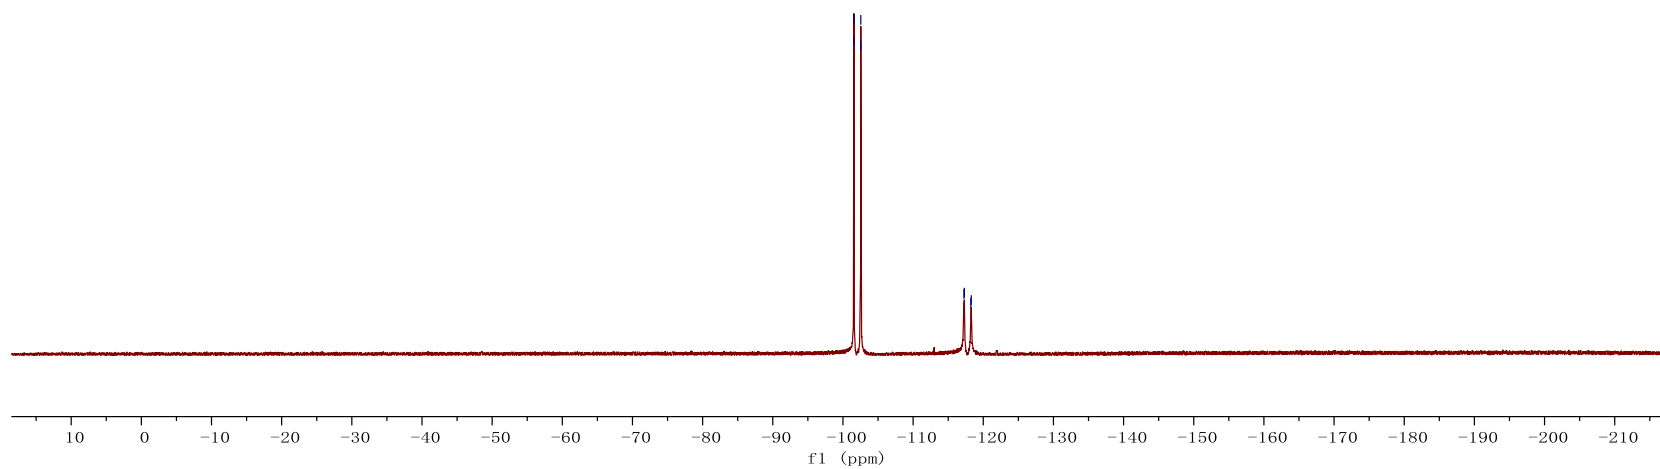







TYP-TB-78-300M-F

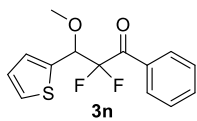

-103.434  
-104.407  
-117.094  
-118.061

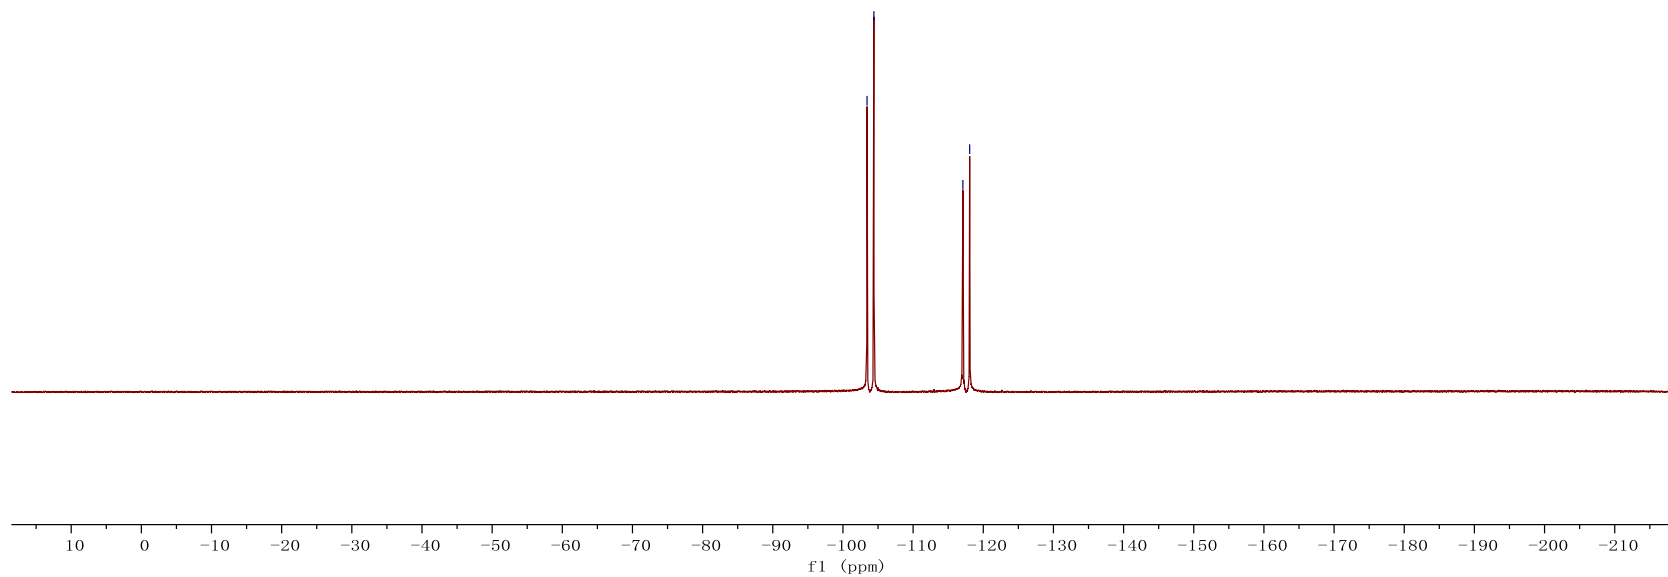

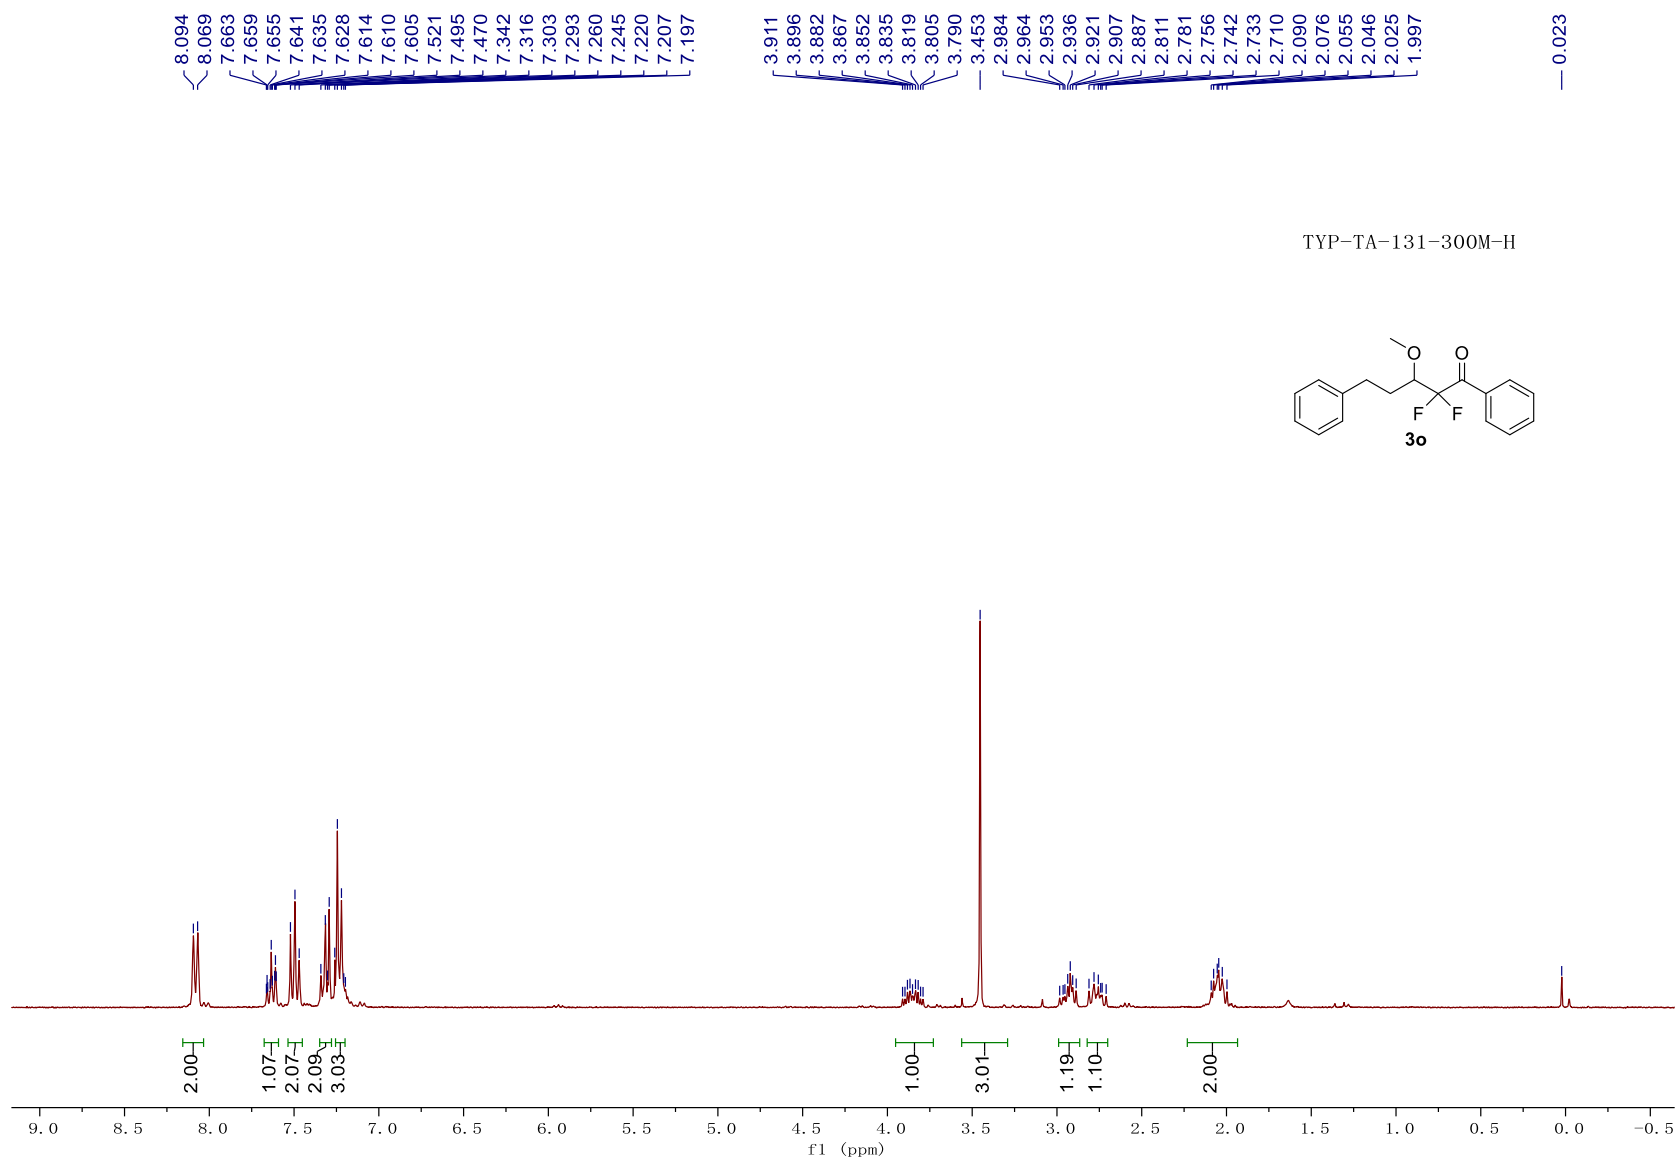

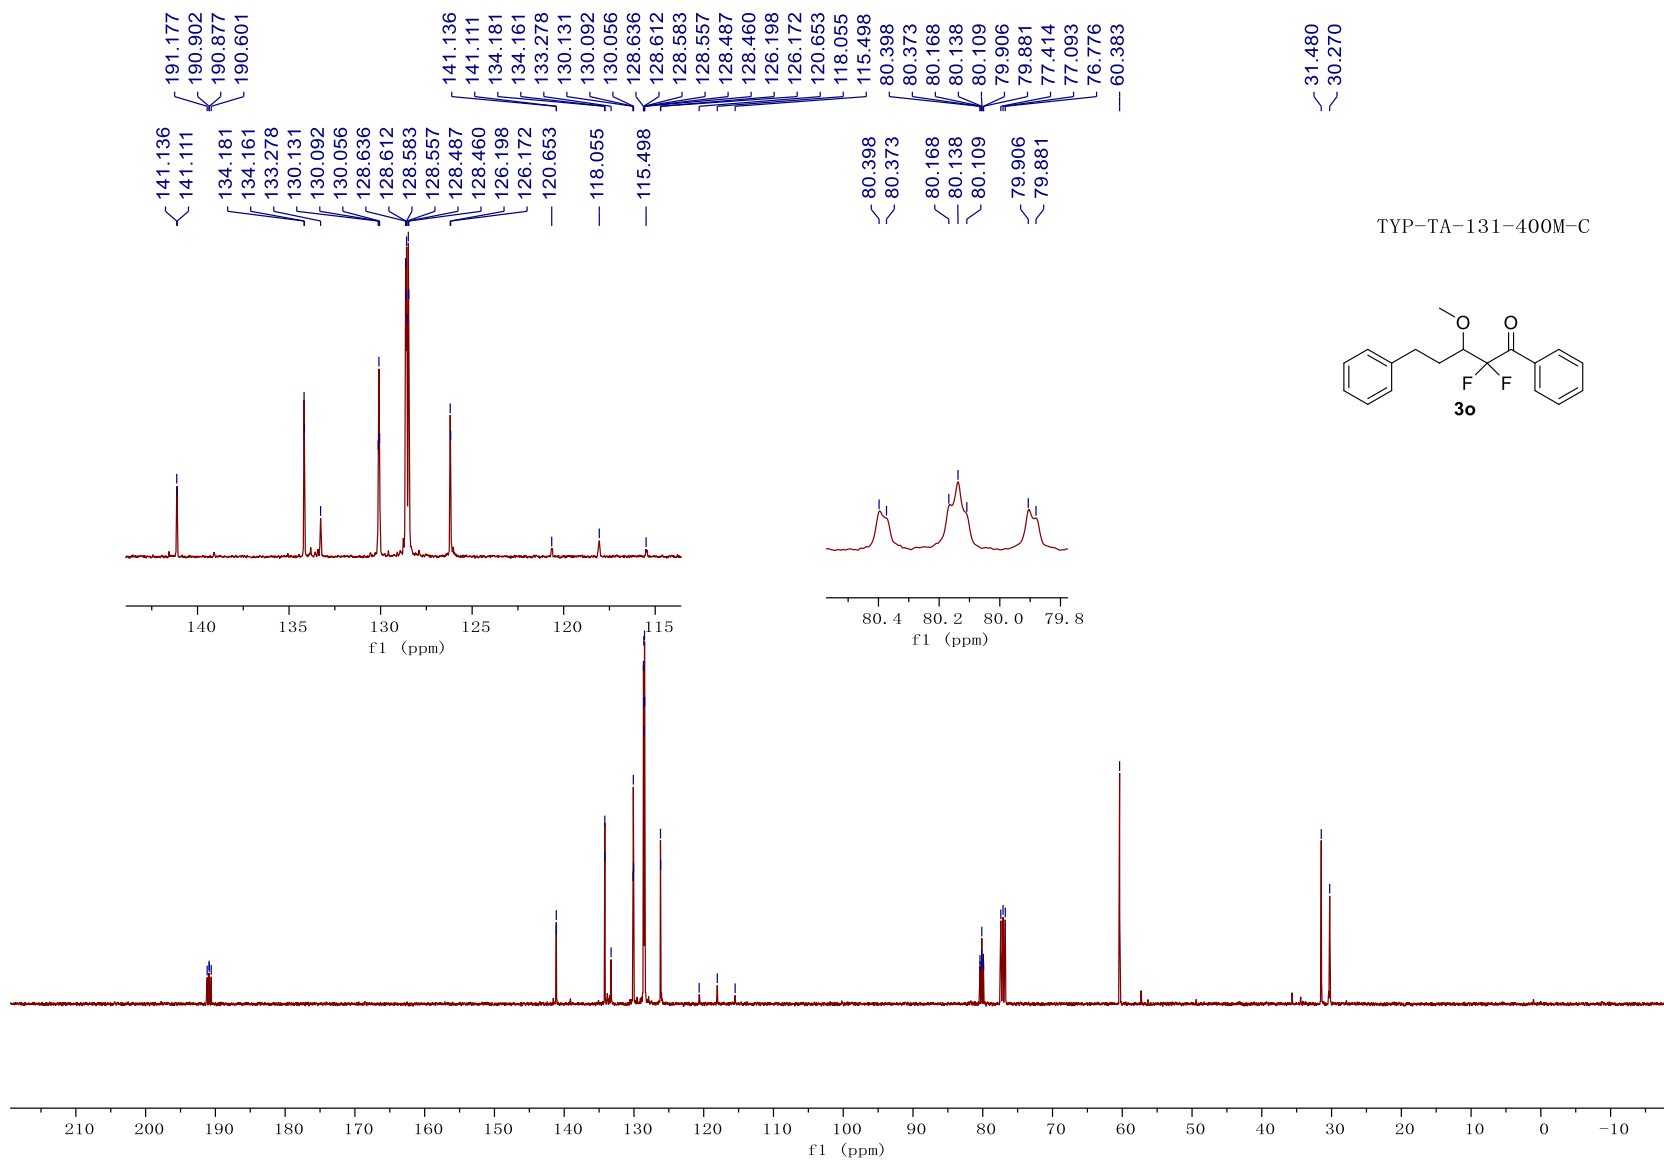

TYP-TA-131-400M-C

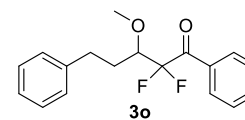

TYP-TA-131-300M-F

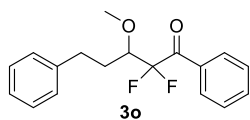

-106.003  
-106.034  
-106.984  
-107.014  
-112.946  
-112.995  
-113.926  
-113.975

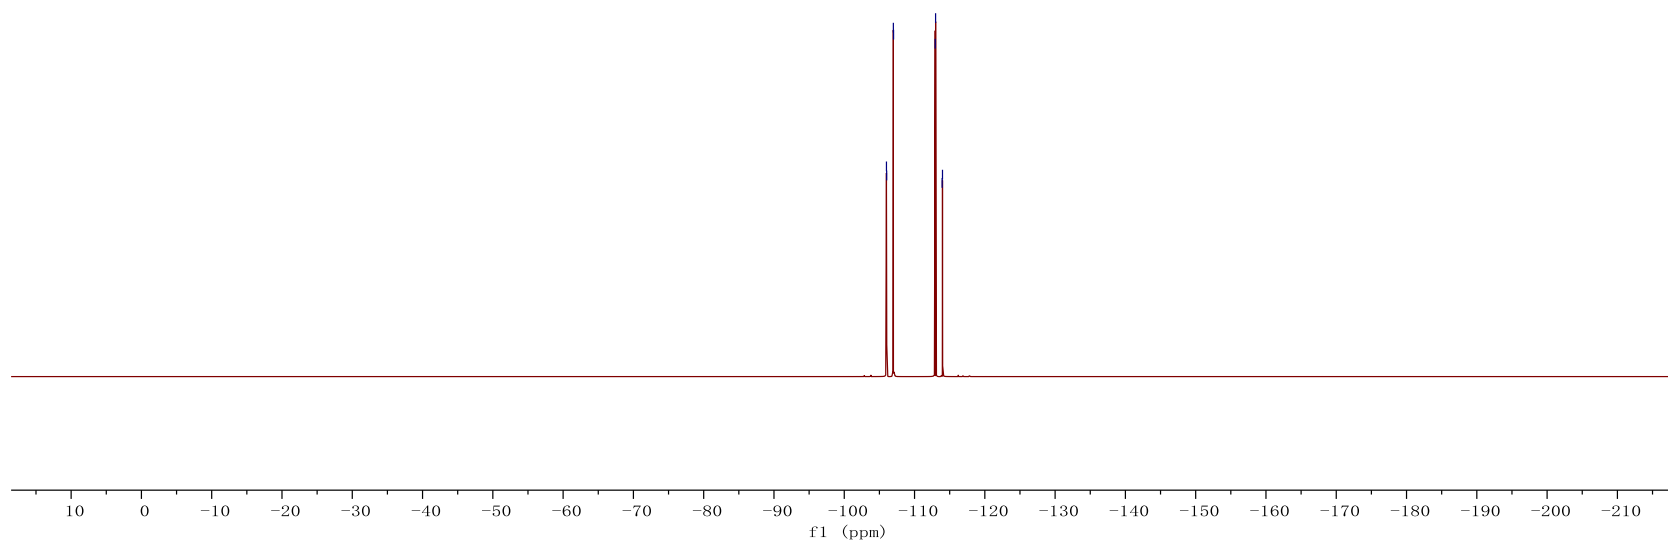

8.069  
8.043  
7.639  
7.614  
7.590  
7.508  
7.482  
7.457  
7.261

3.645  
3.627  
3.617  
3.599  
3.584  
3.565  
3.556  
3.537  
3.370

1.960  
1.924  
1.818  
1.790  
1.753  
1.688  
1.644  
1.587  
1.299  
1.270  
1.257  
1.236  
1.212  
1.177  
1.171  
1.139

— 0.001

TYP-TB-21-300M-H

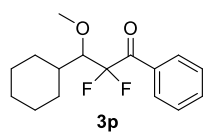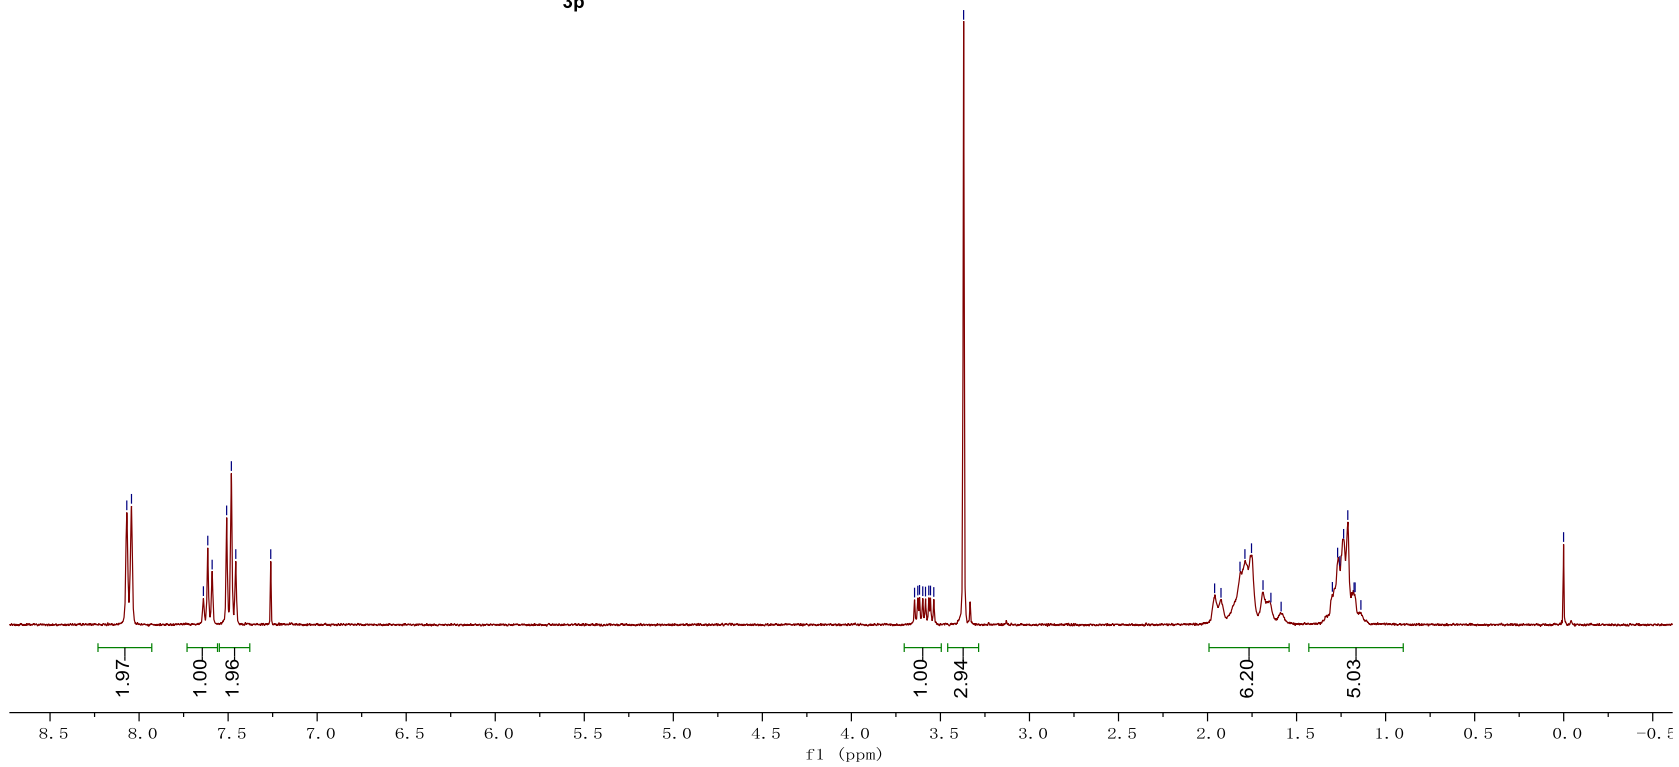

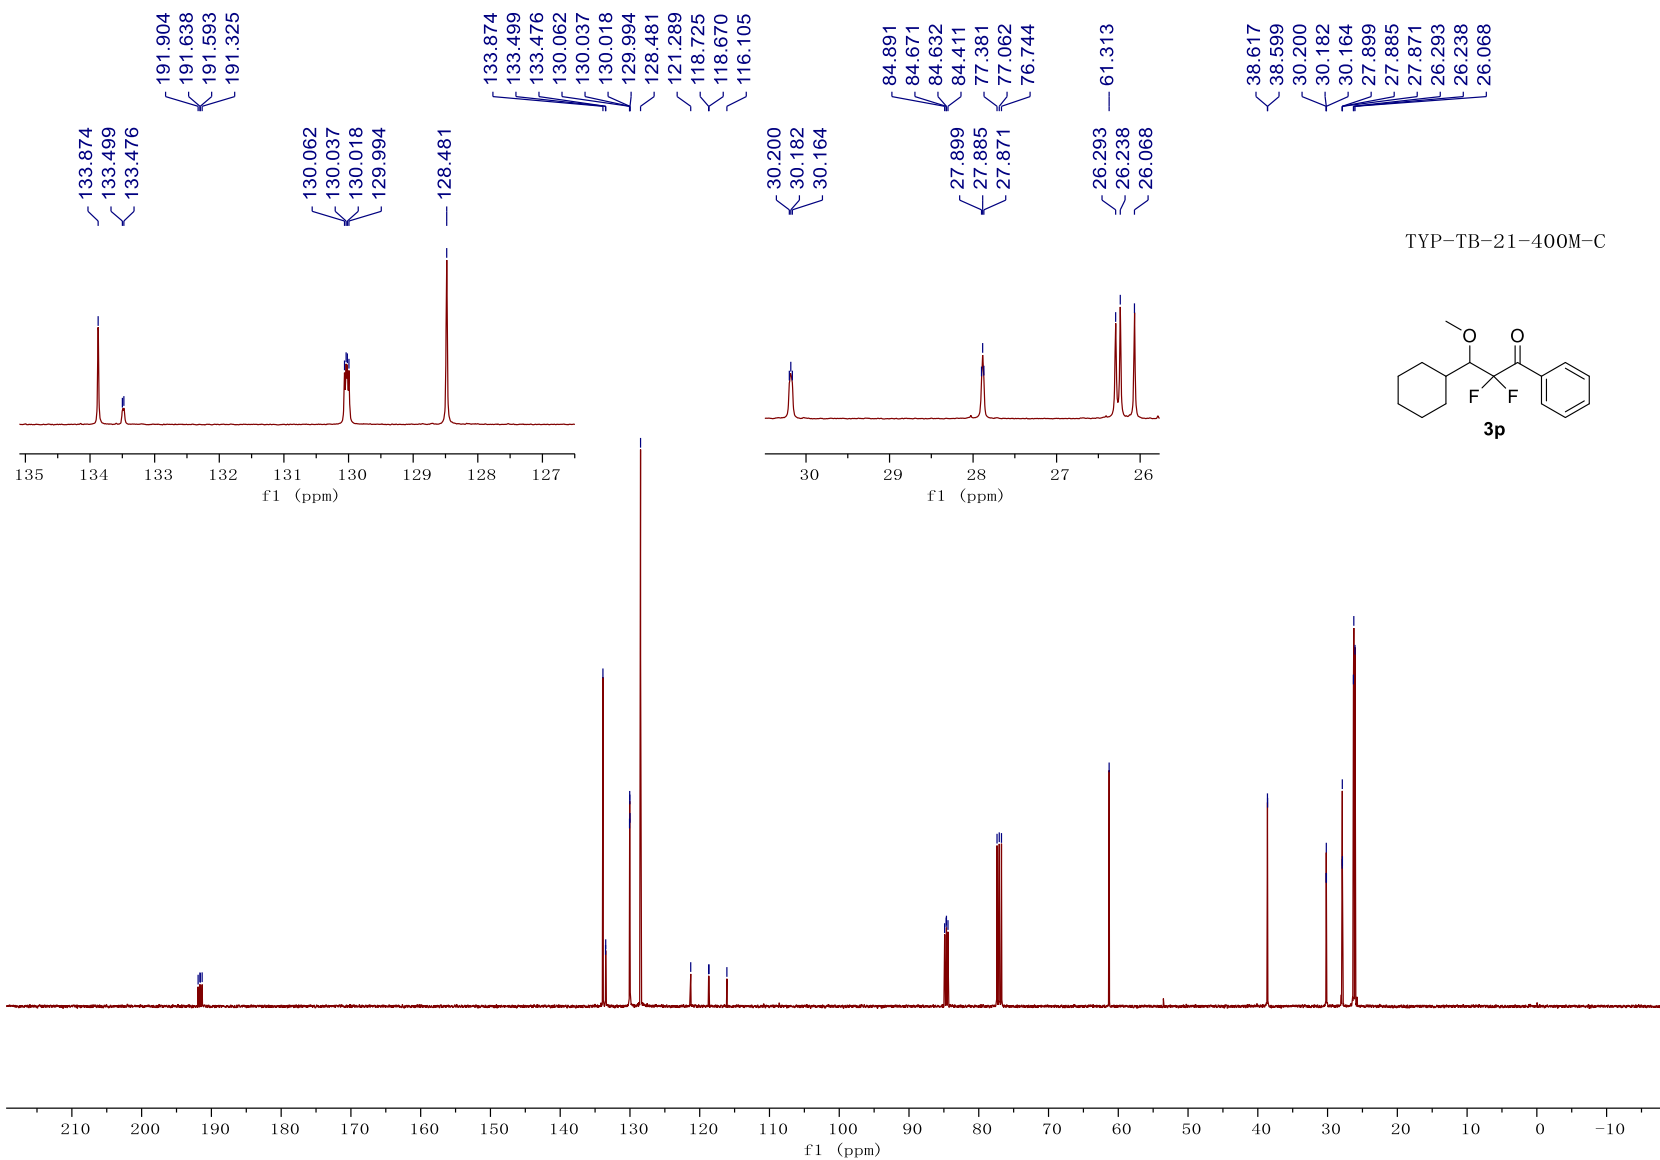

TYP-TB-21-300M-F

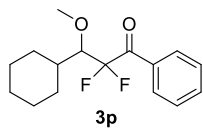

-102.263  
-103.232  
-112.557  
-113.536

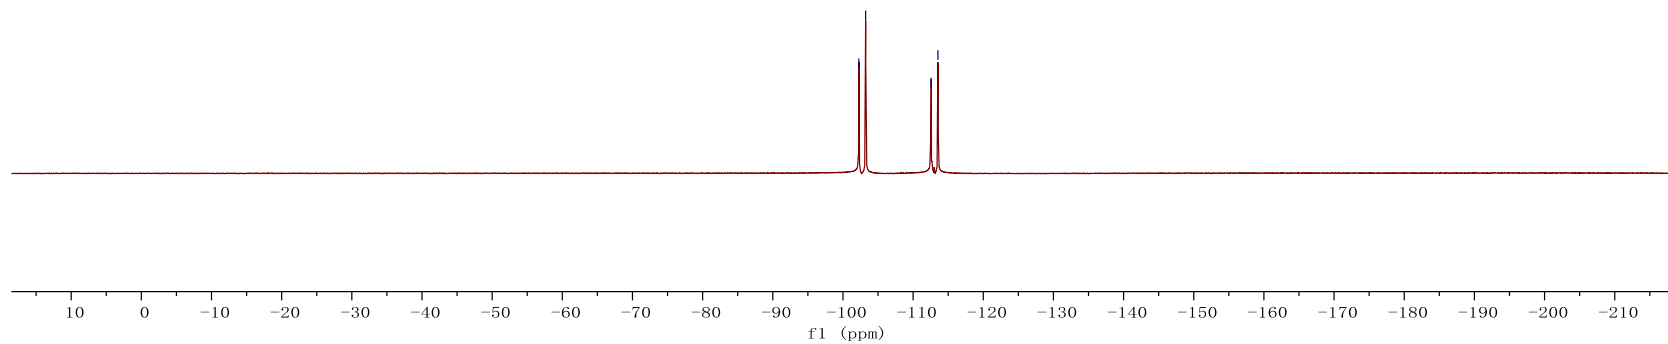

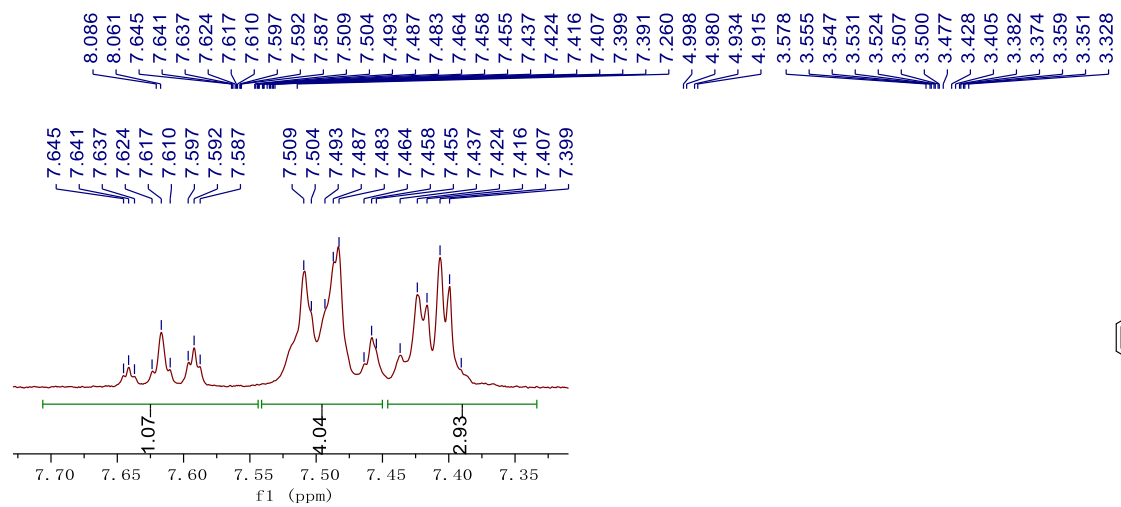

TYP-TA-146-300M-H

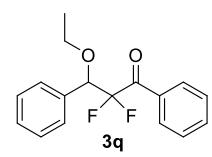

1.101  
1.078  
1.054

— 0.008

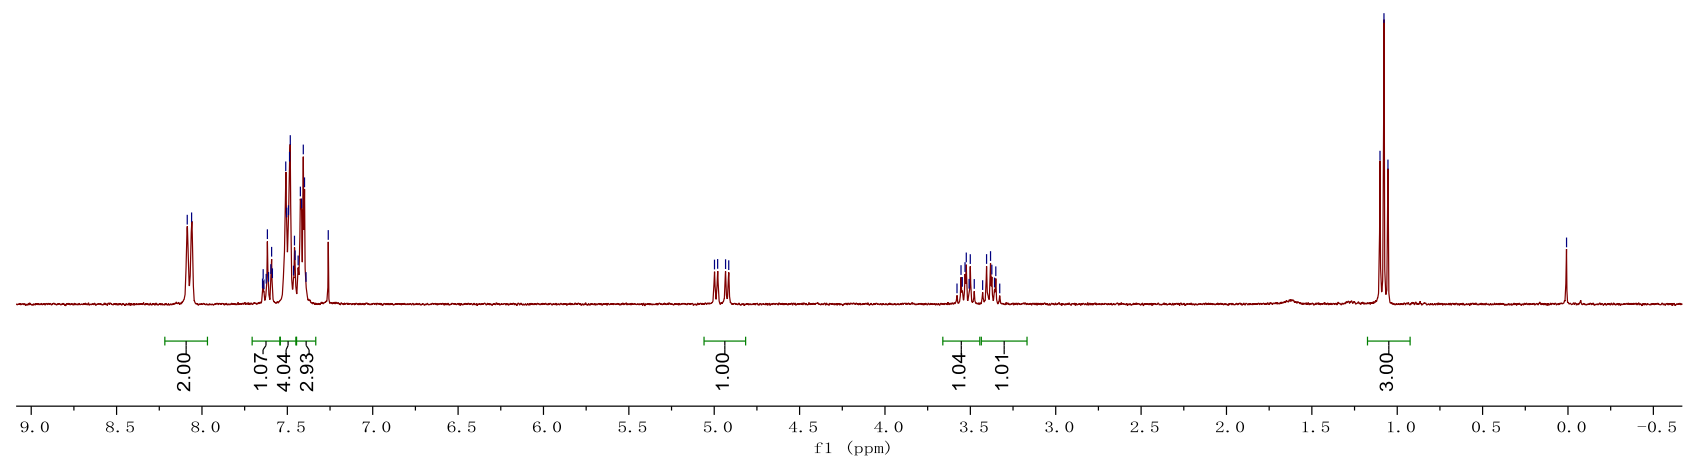



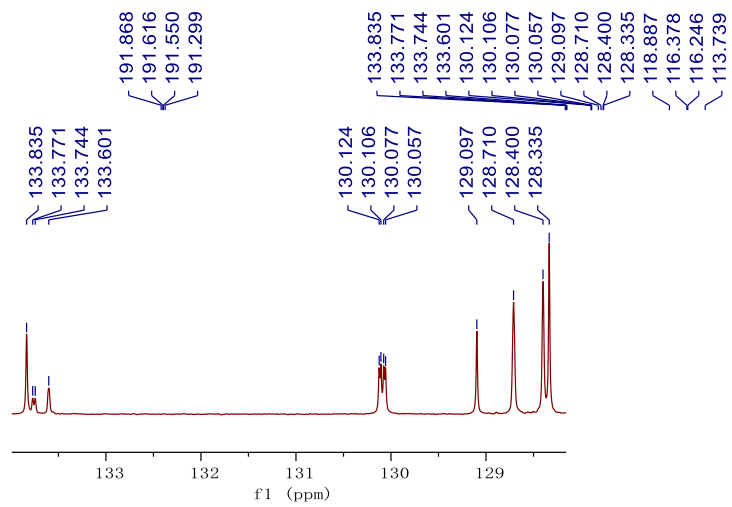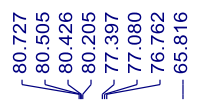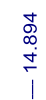

TYP-TB-146-400M-C

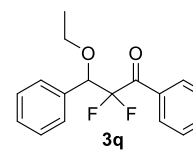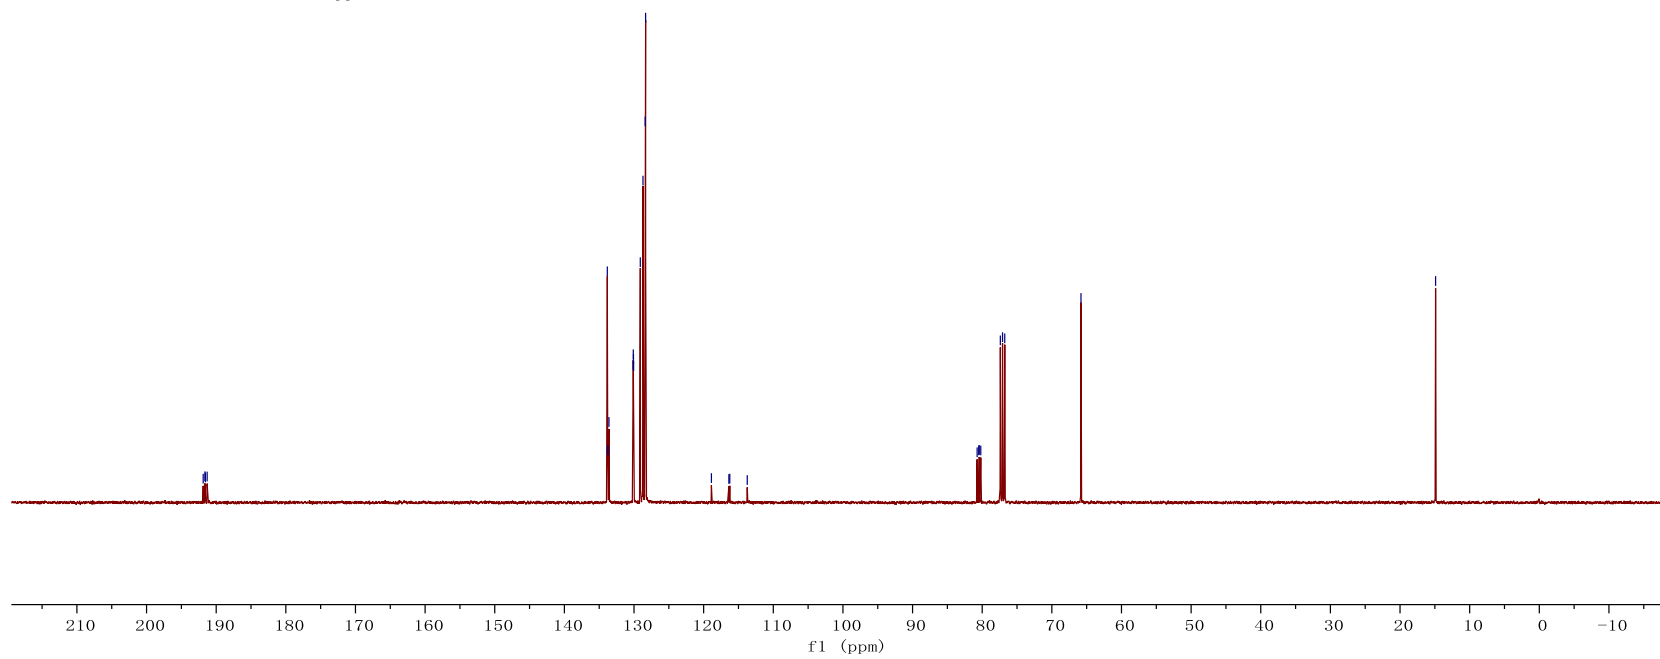

TYP-TA-146-300M-F

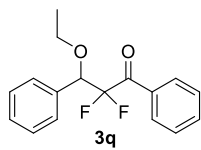

-103.266  
-103.283  
-104.220  
-104.240  
-117.611  
-117.665  
-118.568  
-118.624

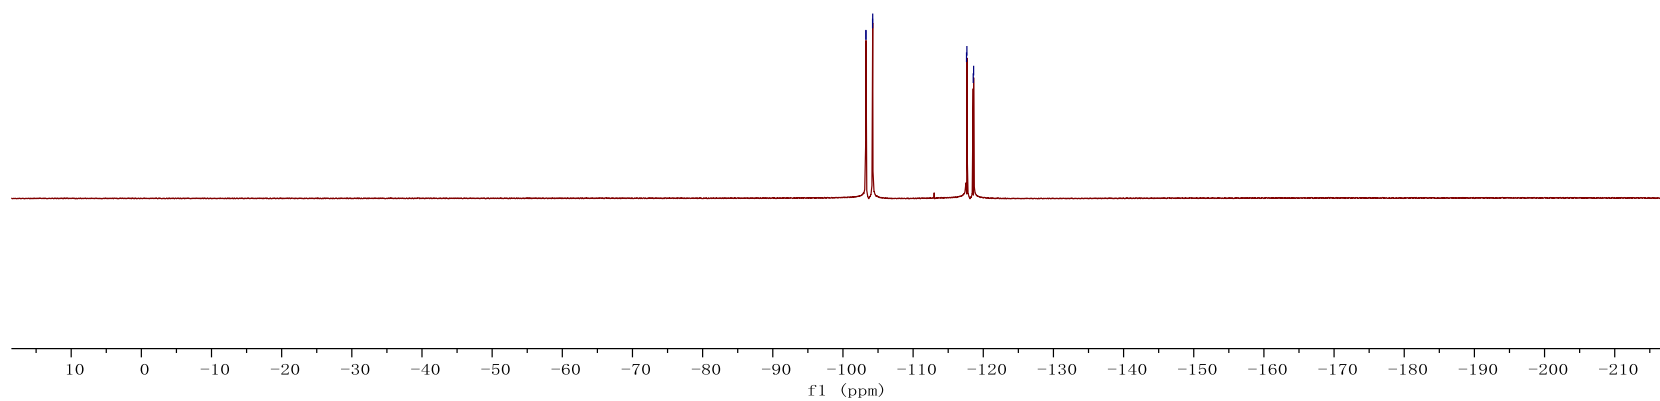

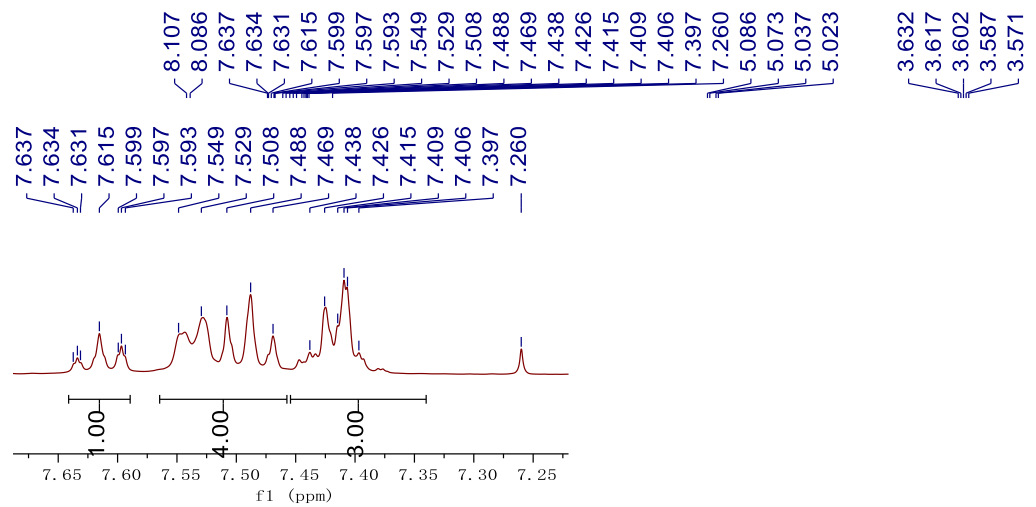

GOY-GD-21-400M-1H

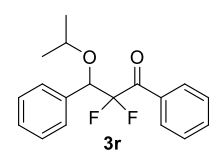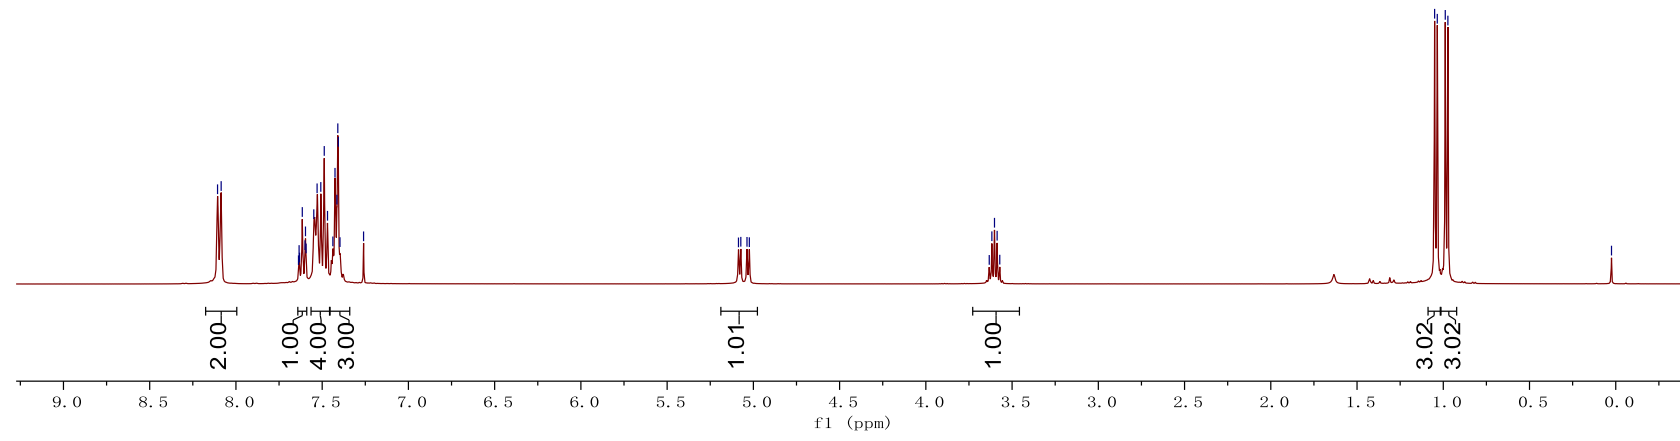

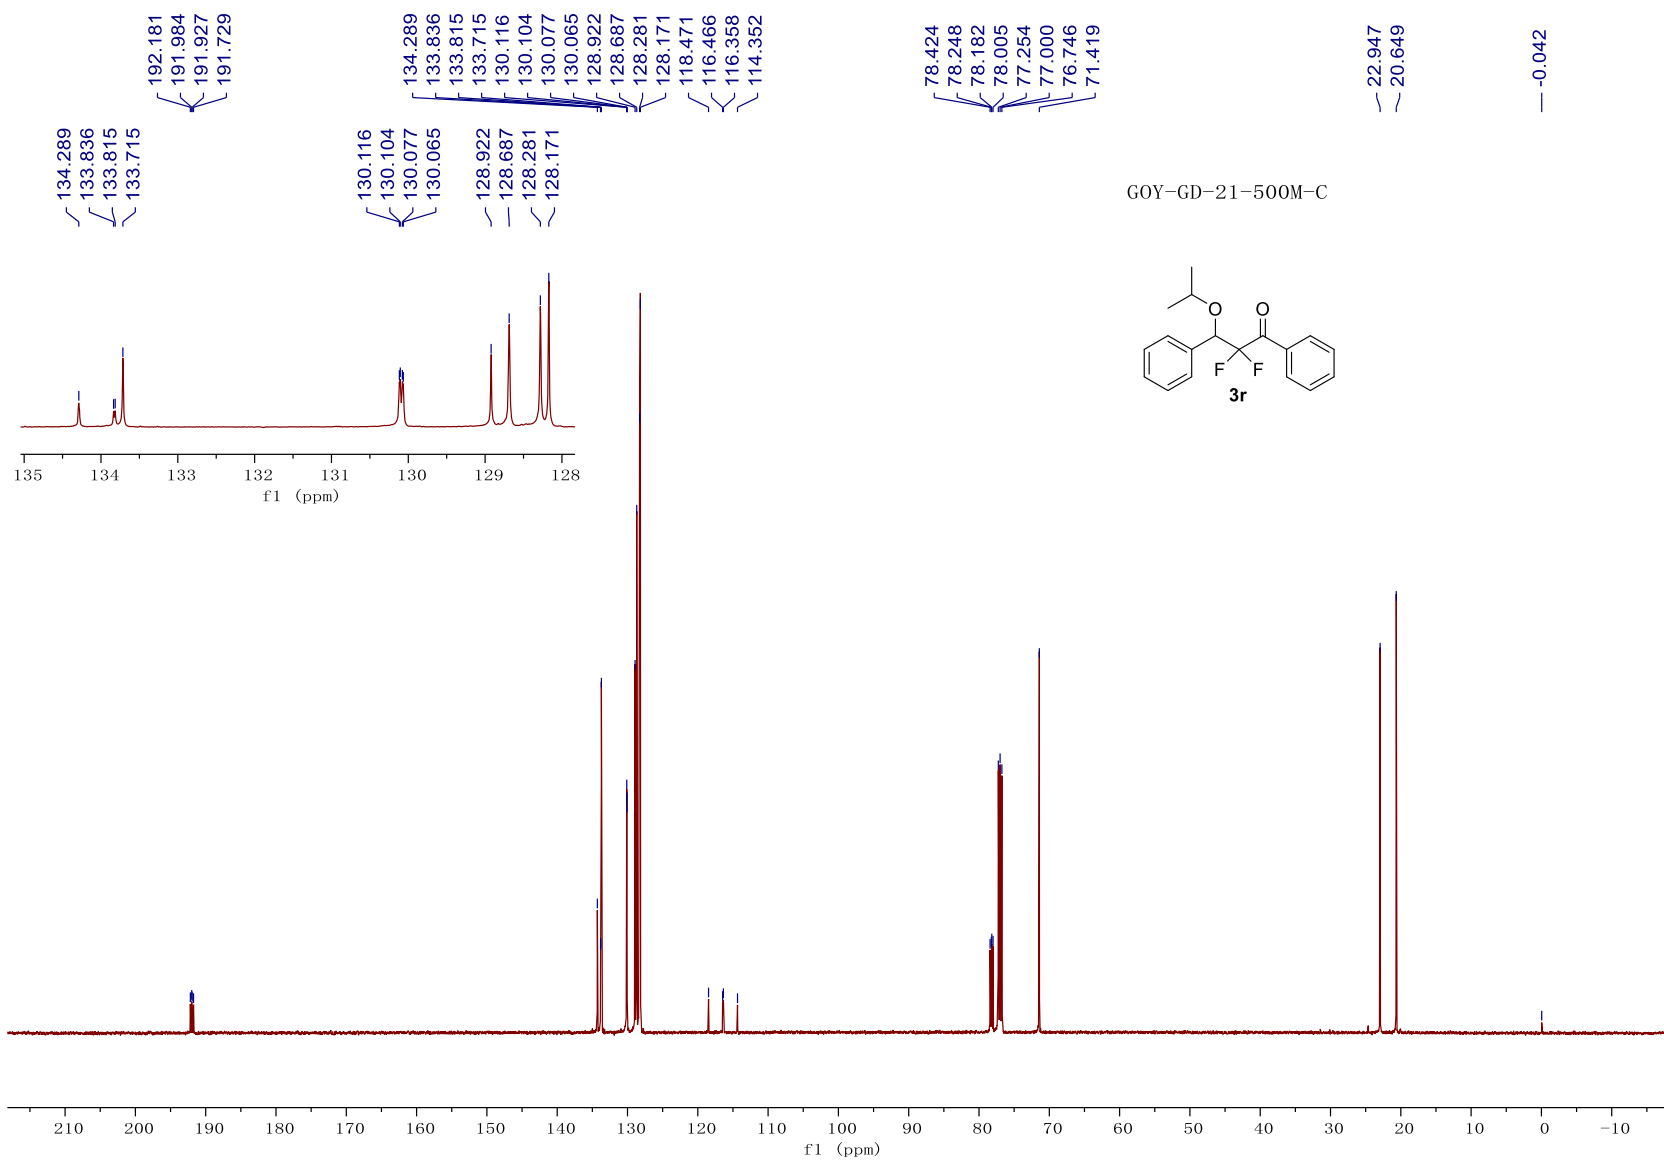

GOY-GD-21-400M-F

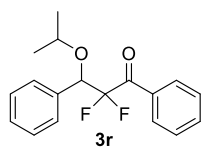

-102.933  
-103.640

-117.885  
-118.592

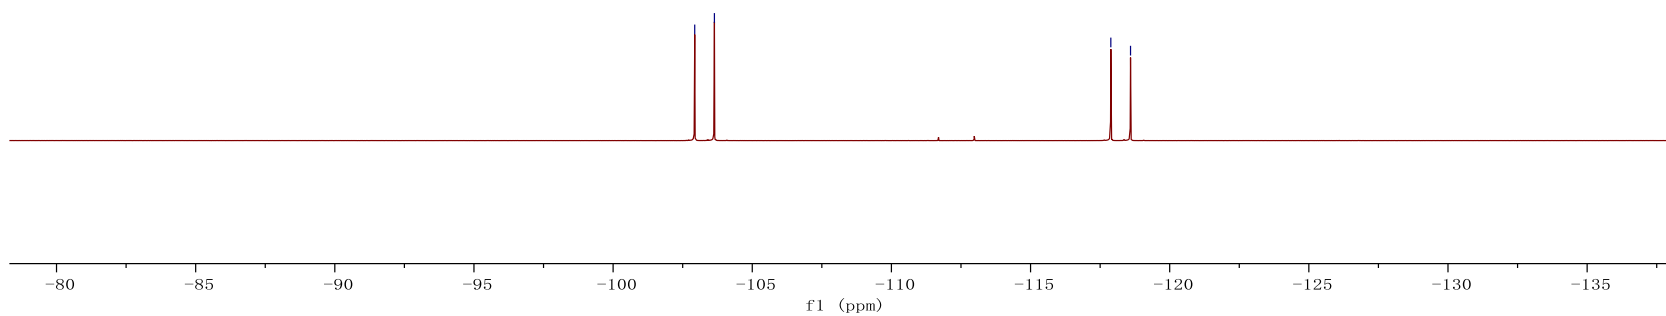

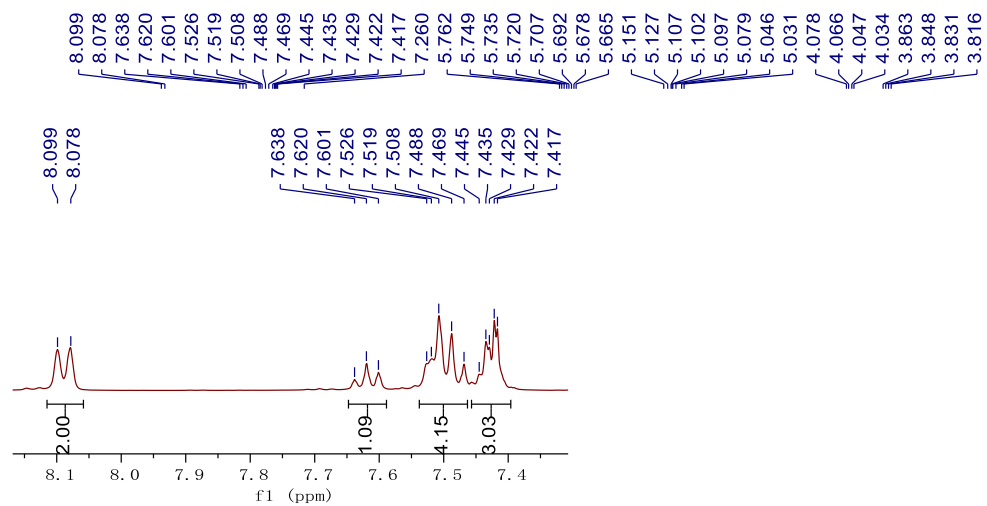

GOY-GA-34-400M-H

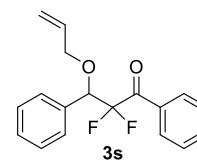

— 0.029

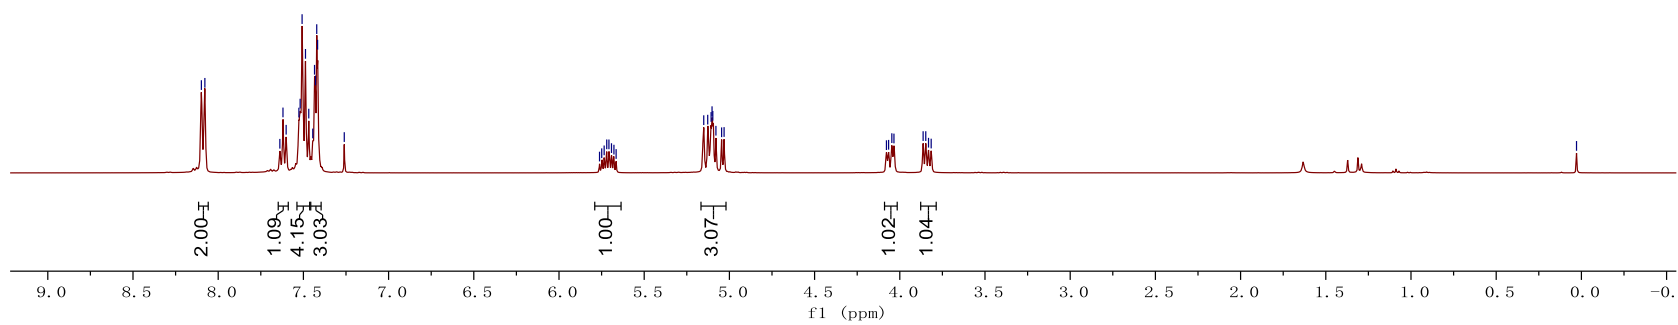

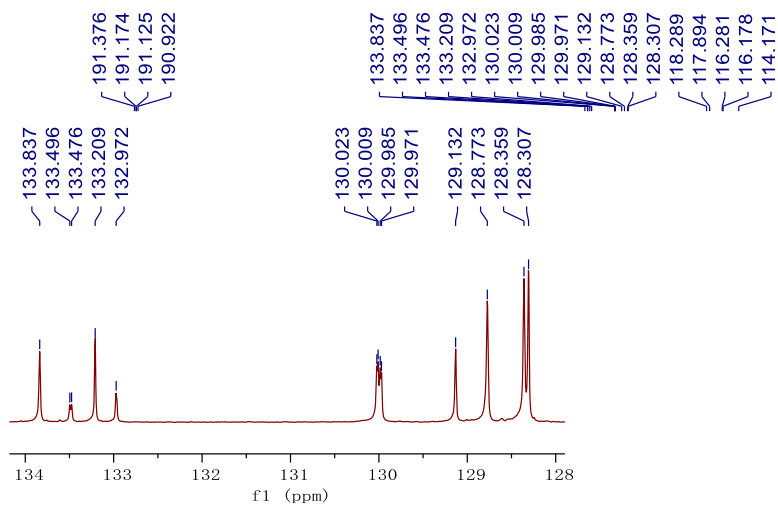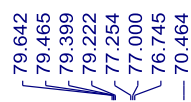

GOY-GD-34-500M-C

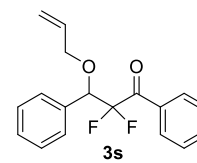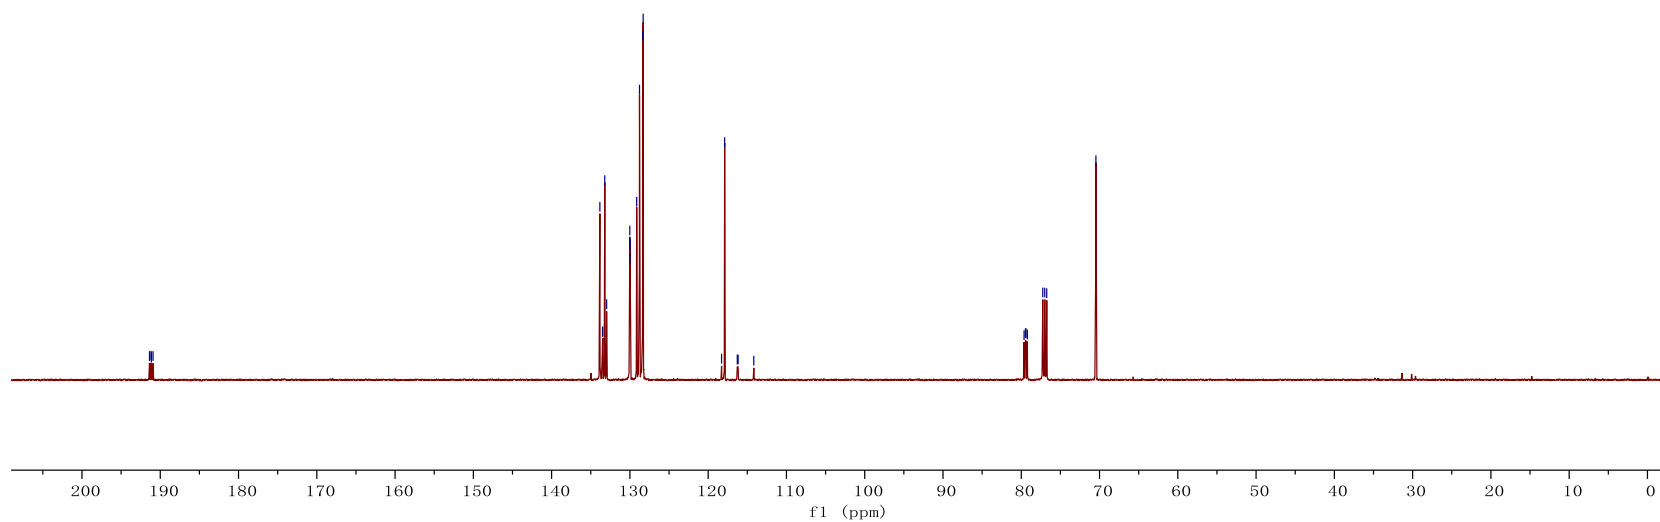

GOY-GA-34-400M-F

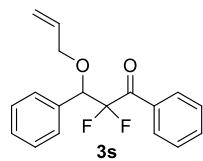

-103.241  
-103.963

-117.032  
-117.753

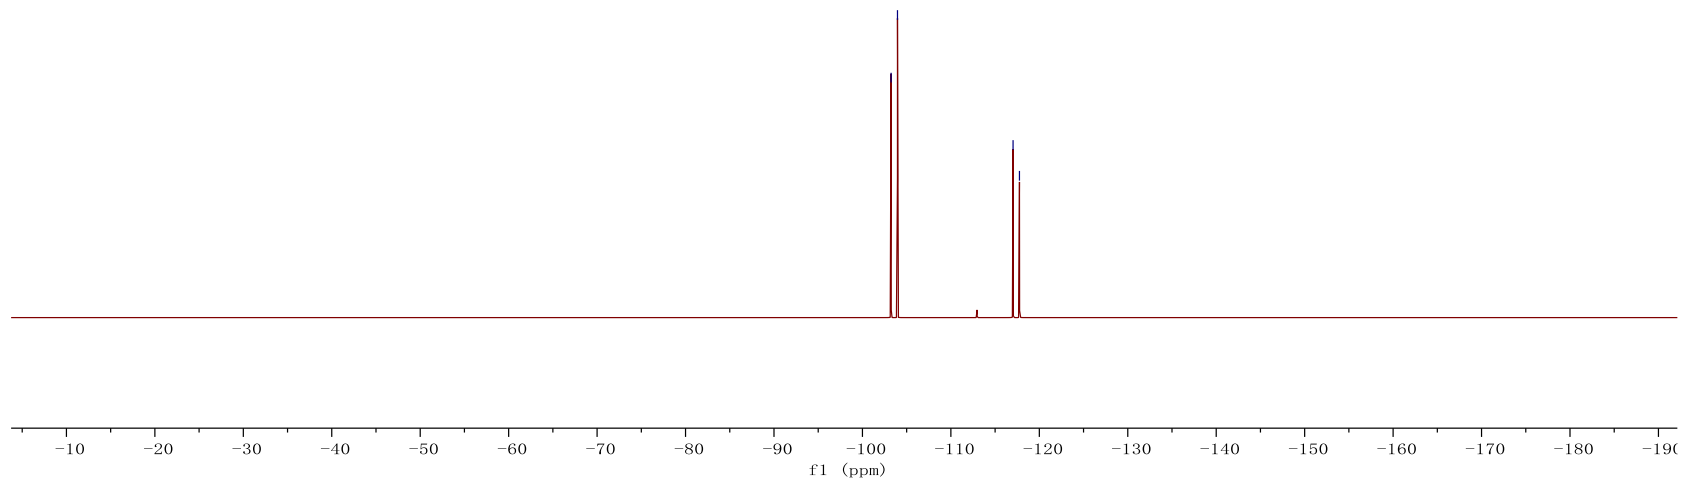



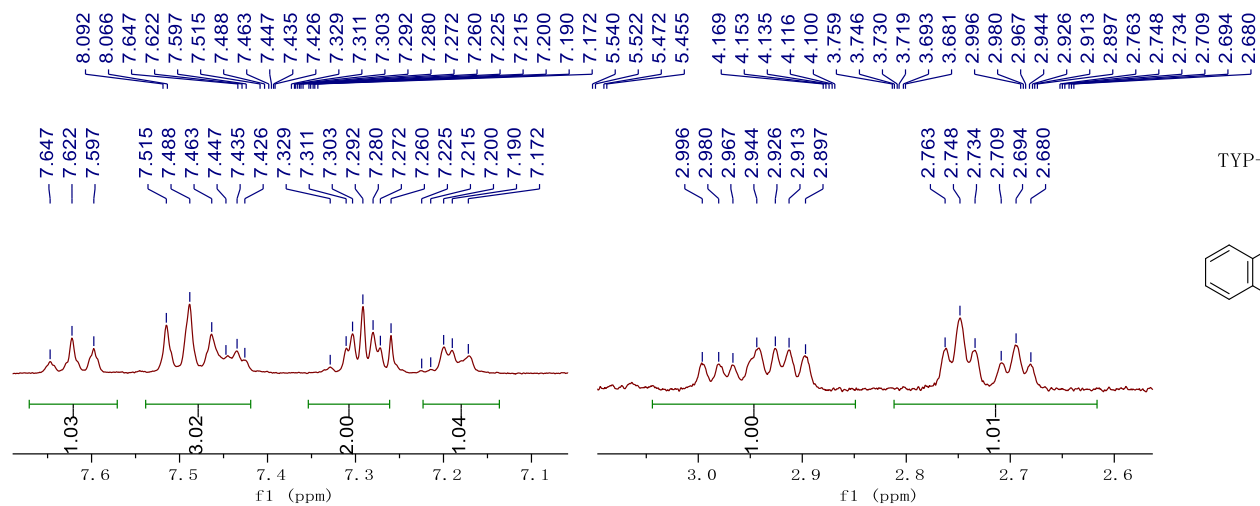

TYP-TA-125-300M-H

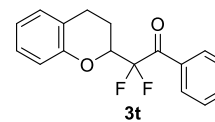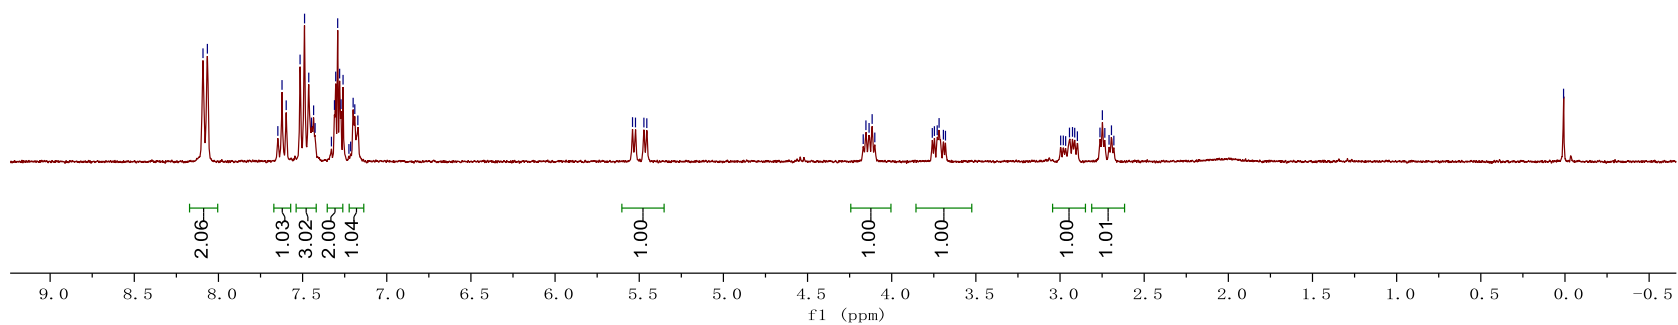

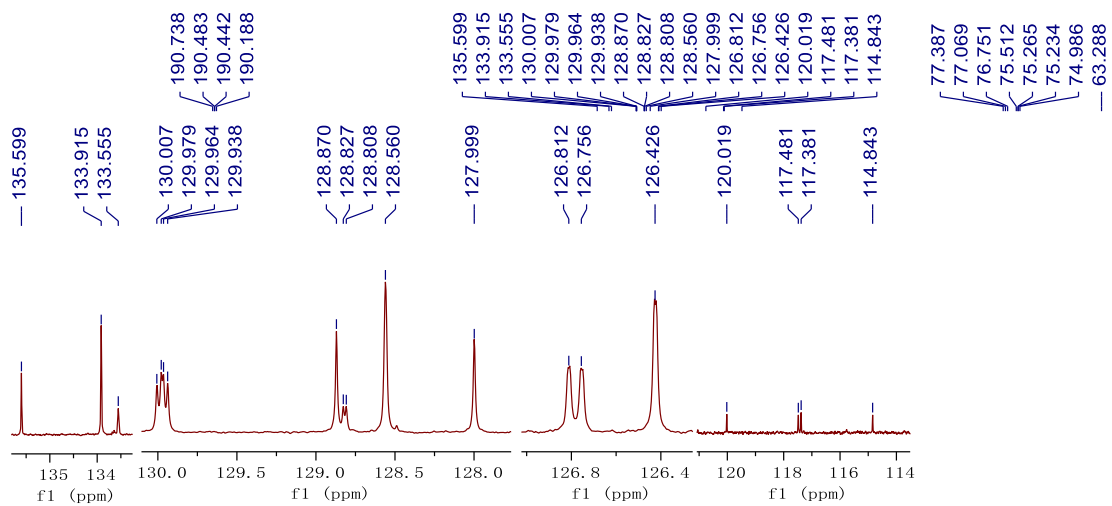

TYP-TA-125-400M-C

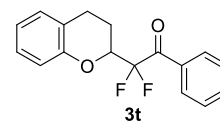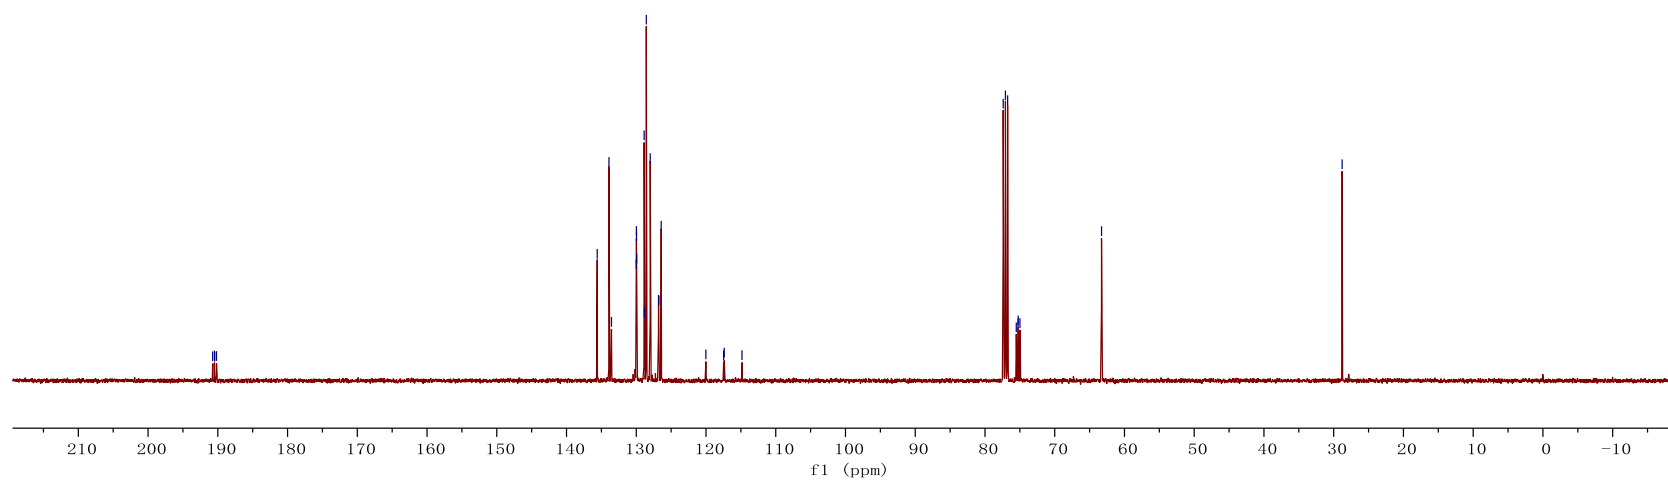

TYP-TA-125-300M-F

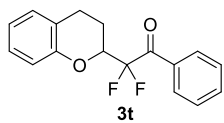

-100.657  
-100.677  
-101.592  
-101.614  
-114.683  
-114.746  
-115.621  
-115.684

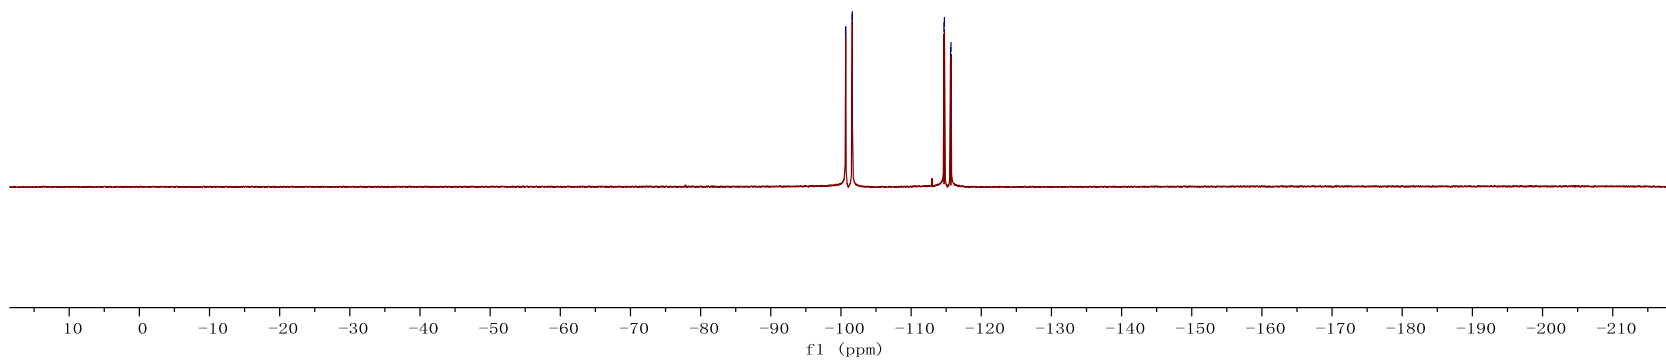

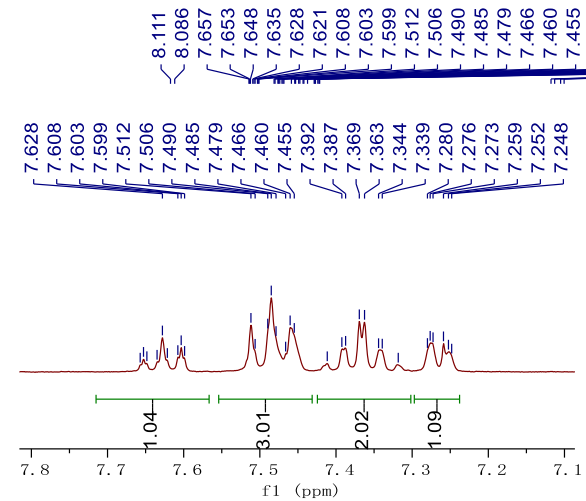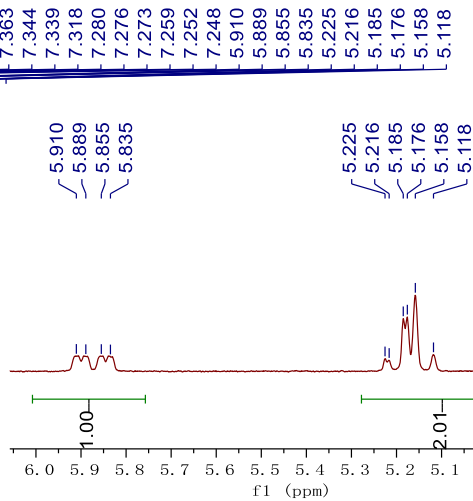

TYP-TA-127-300M-H

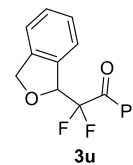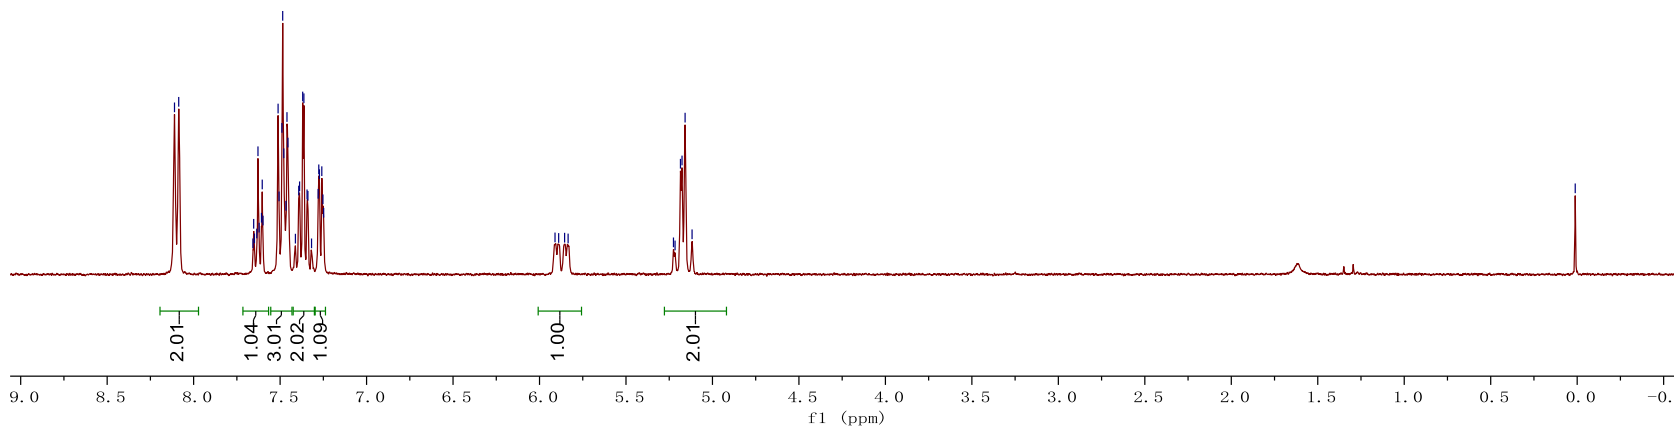

— 0.011

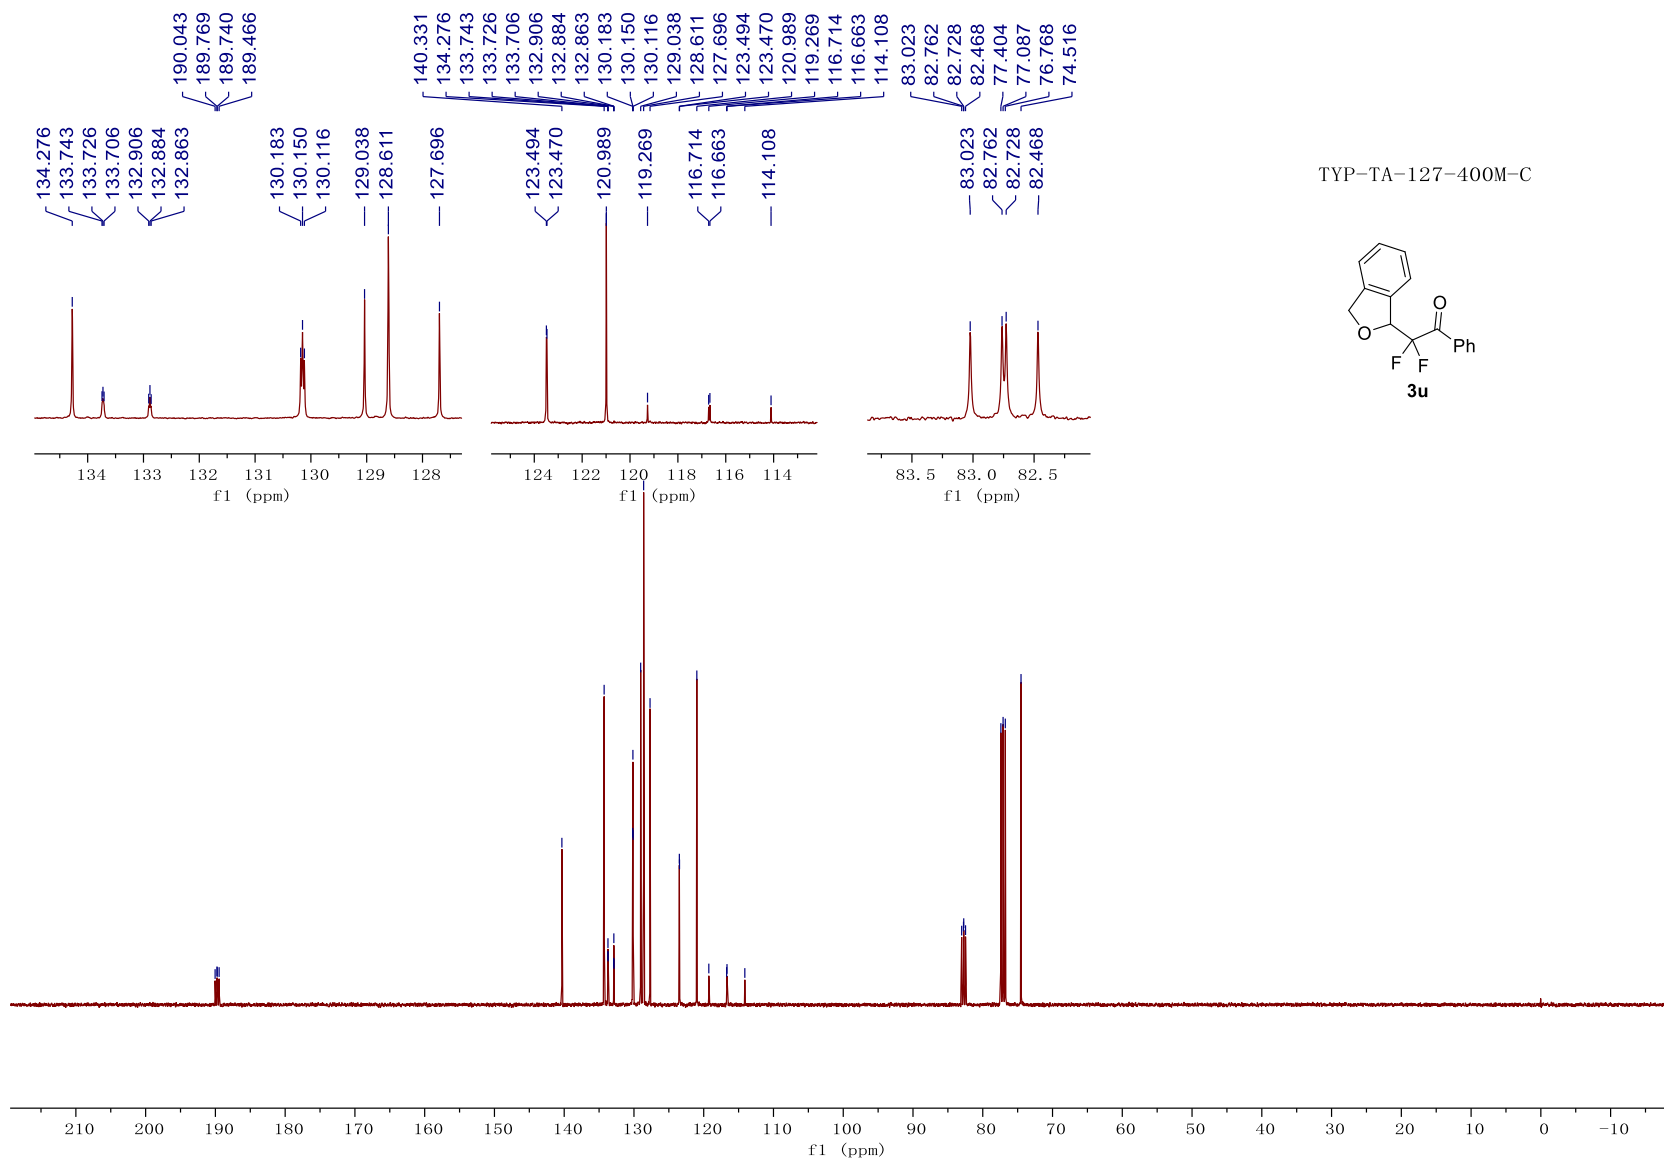

TYP-TA-127-300M-F

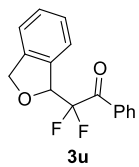

-106.689  
-107.693  
-114.537  
-115.542

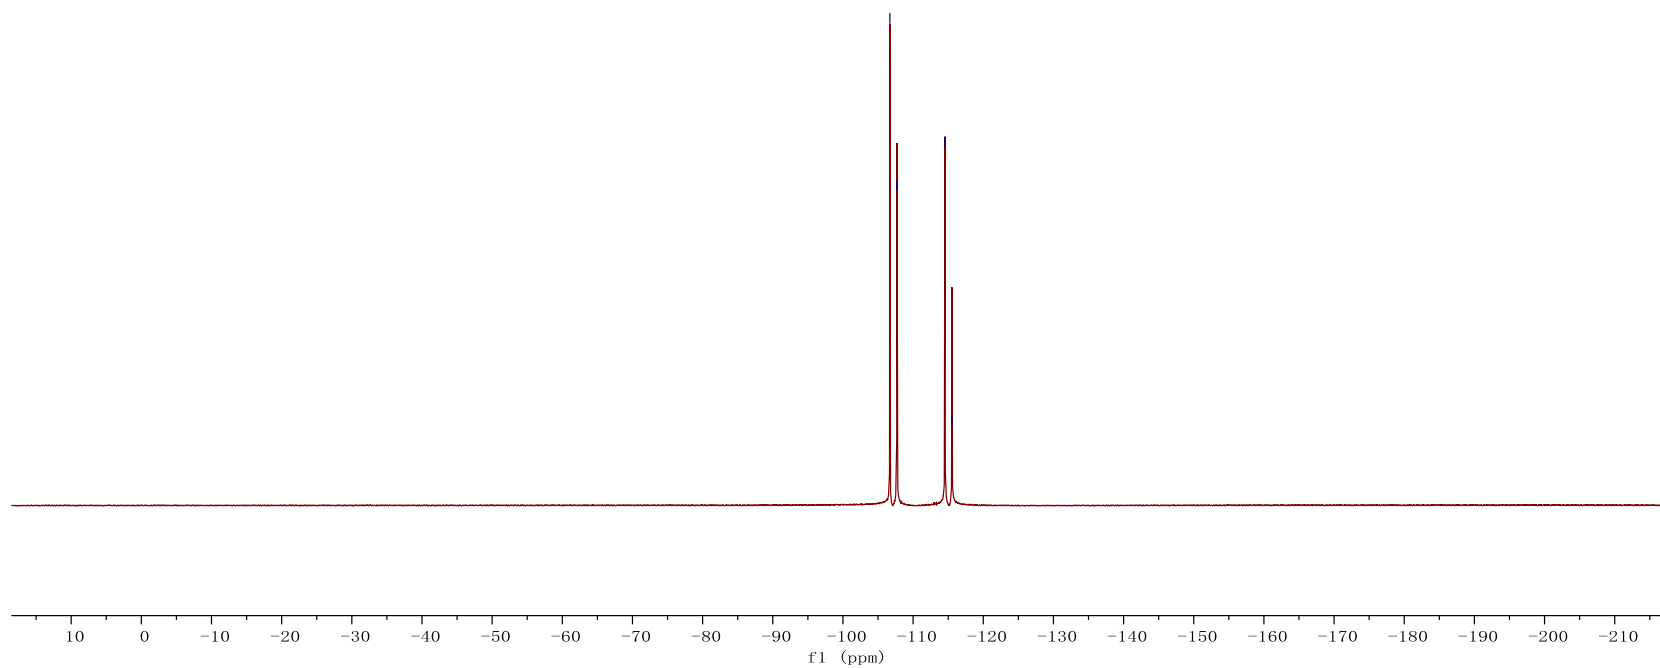

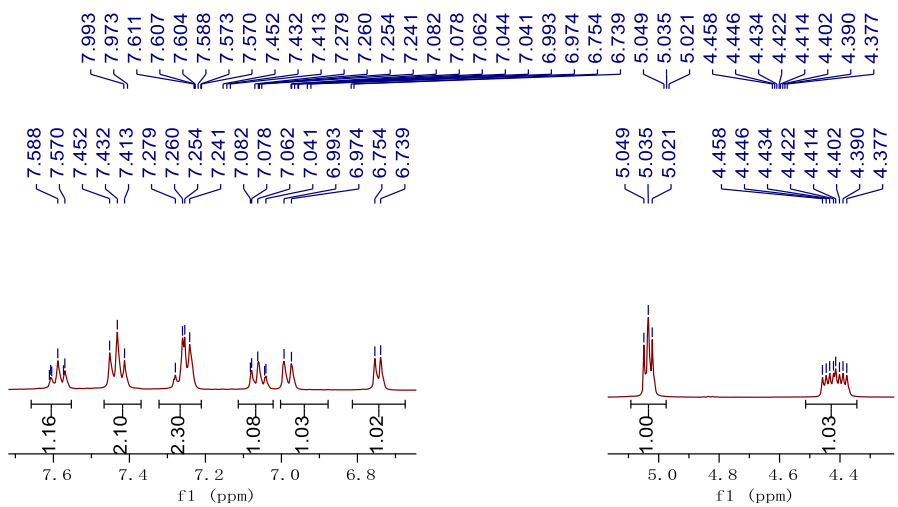

GOY-GA-35-400M-H

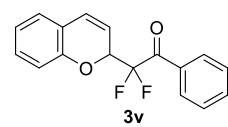

— 0.014

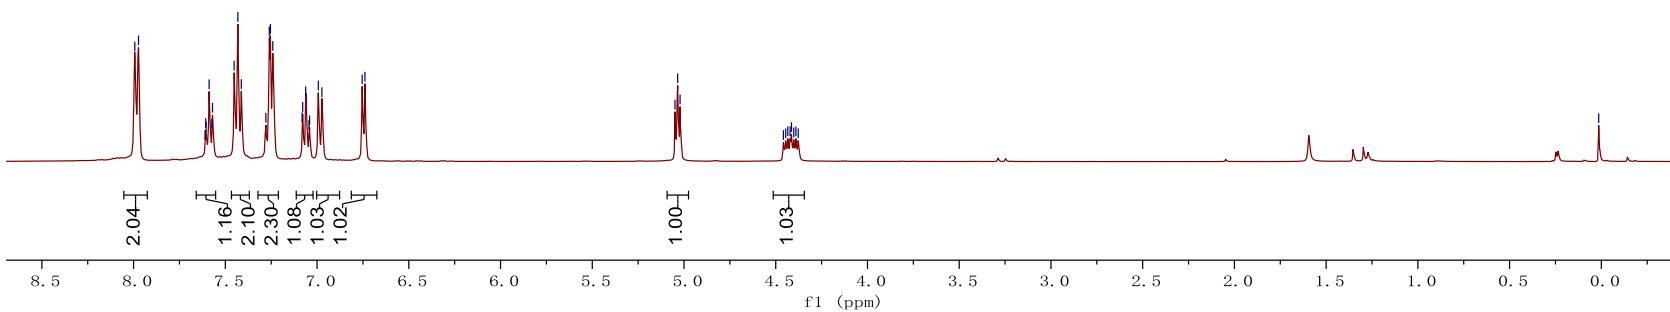

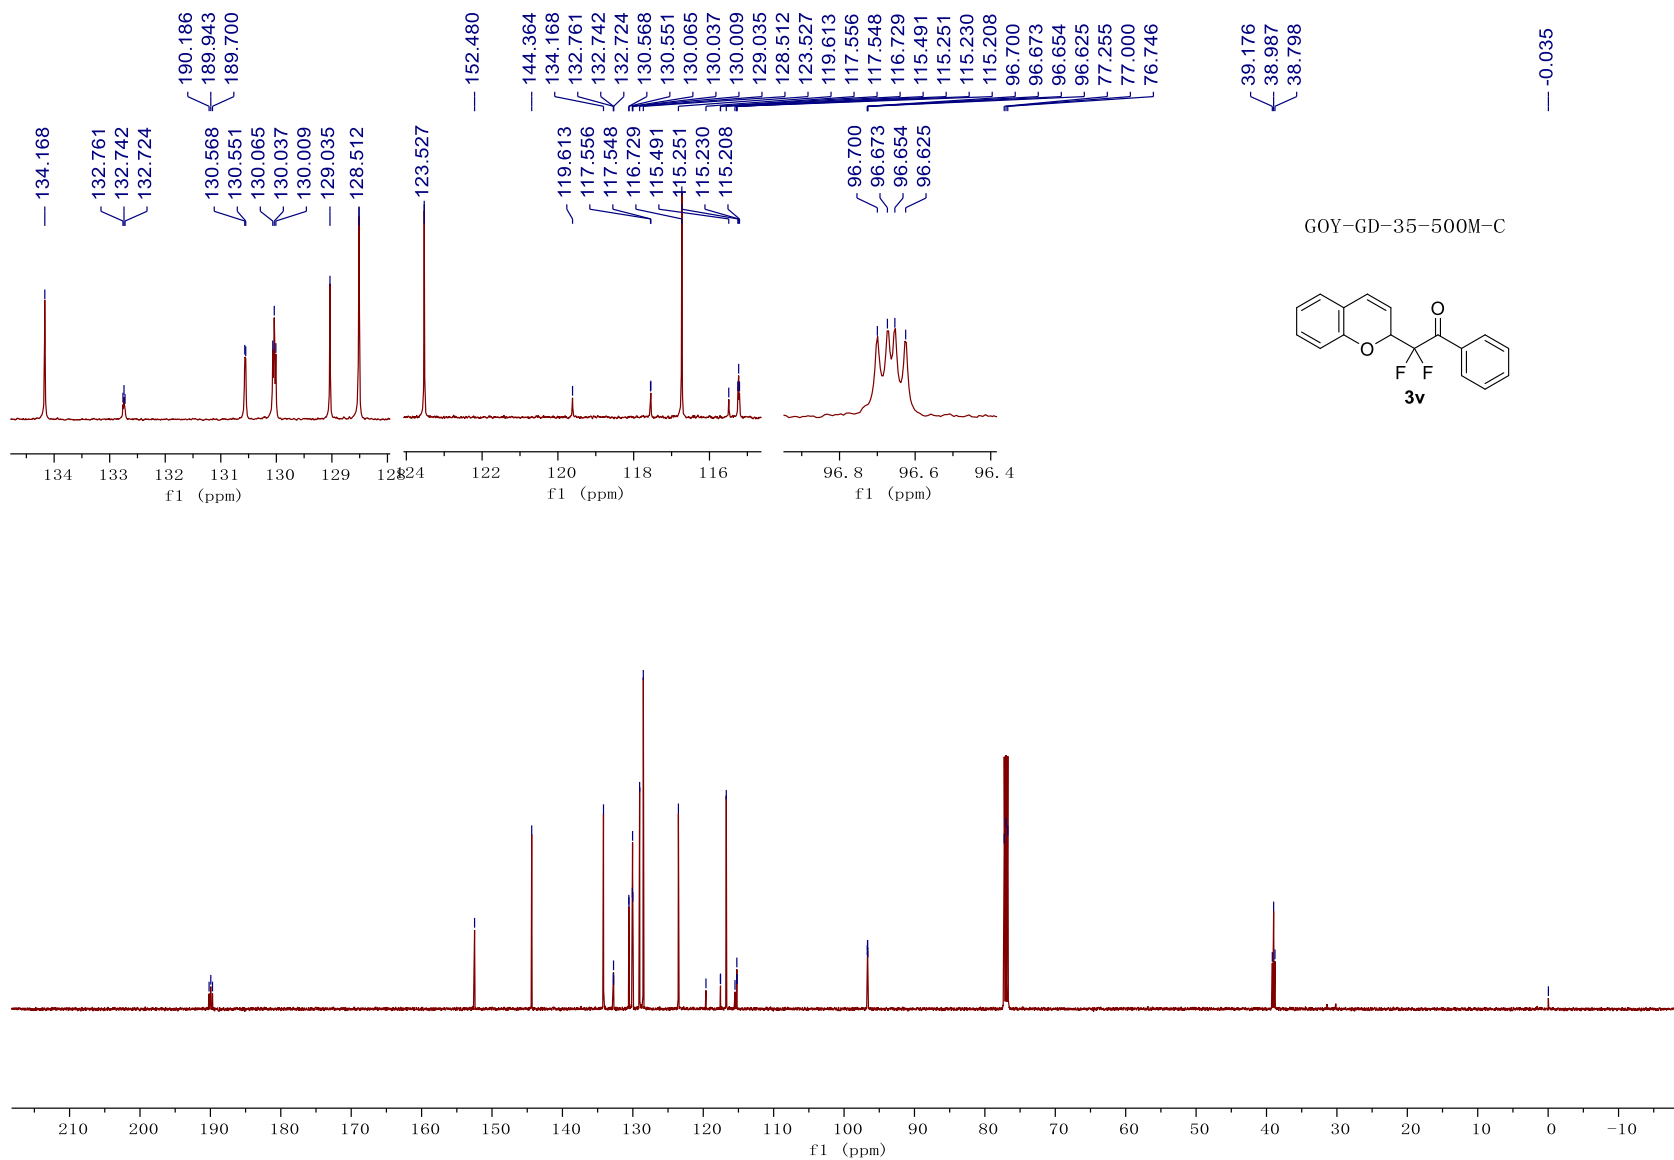



GOY-GA-35-400M-F

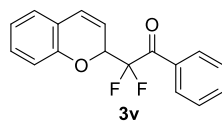

— -100.919  
— -101.656

— -106.267  
— -107.005

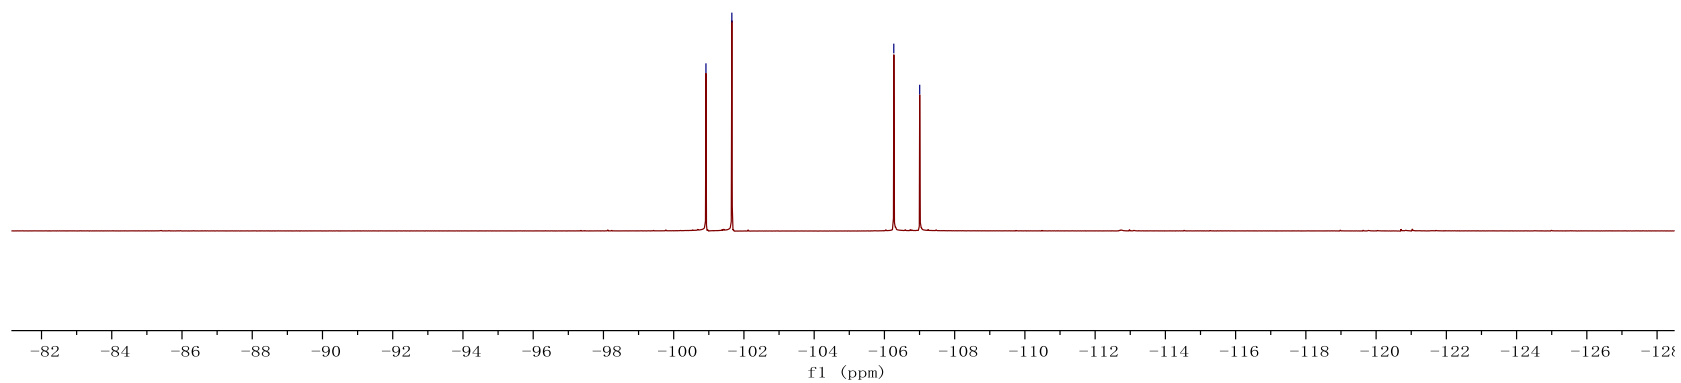

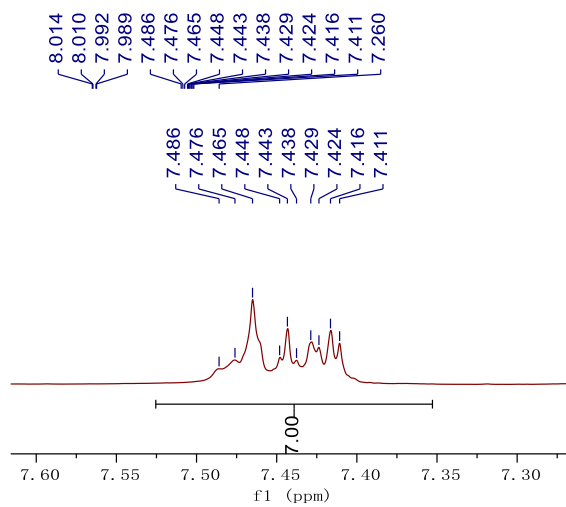

4.869  
4.855  
4.822  
4.807

— 3.295

— 1.577

— 0.011

GOY-GA-37-400M-H

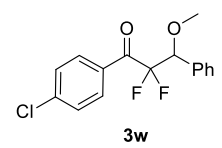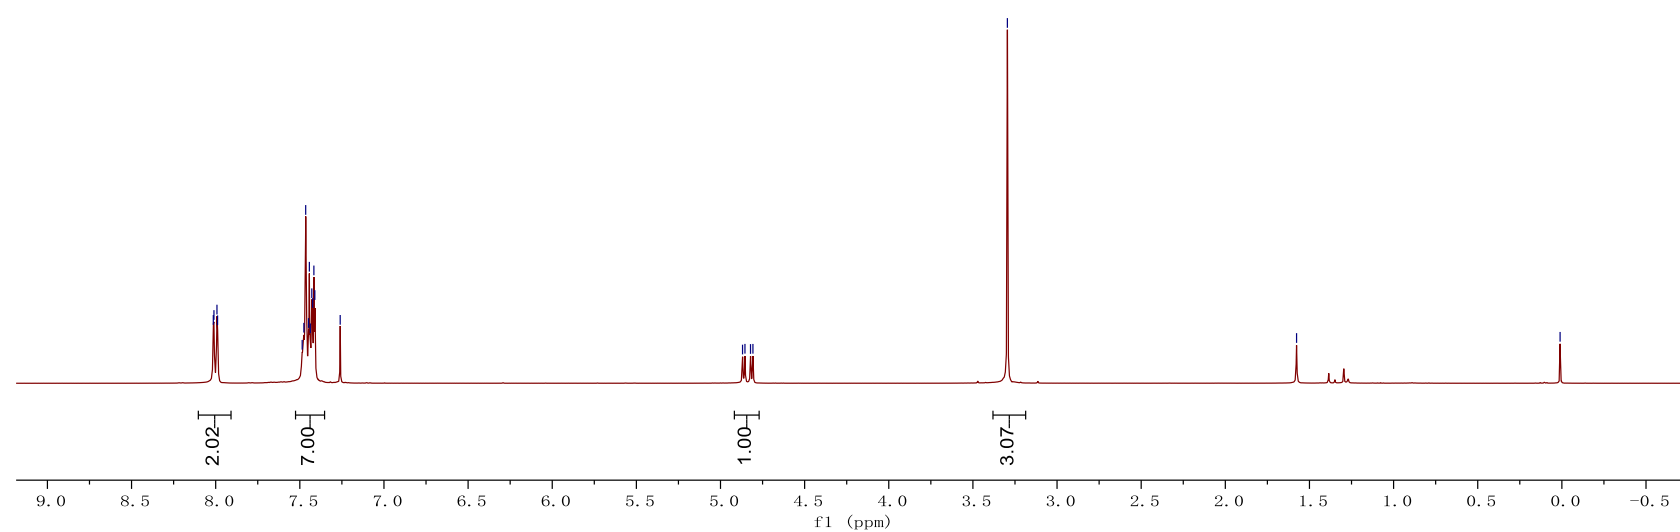

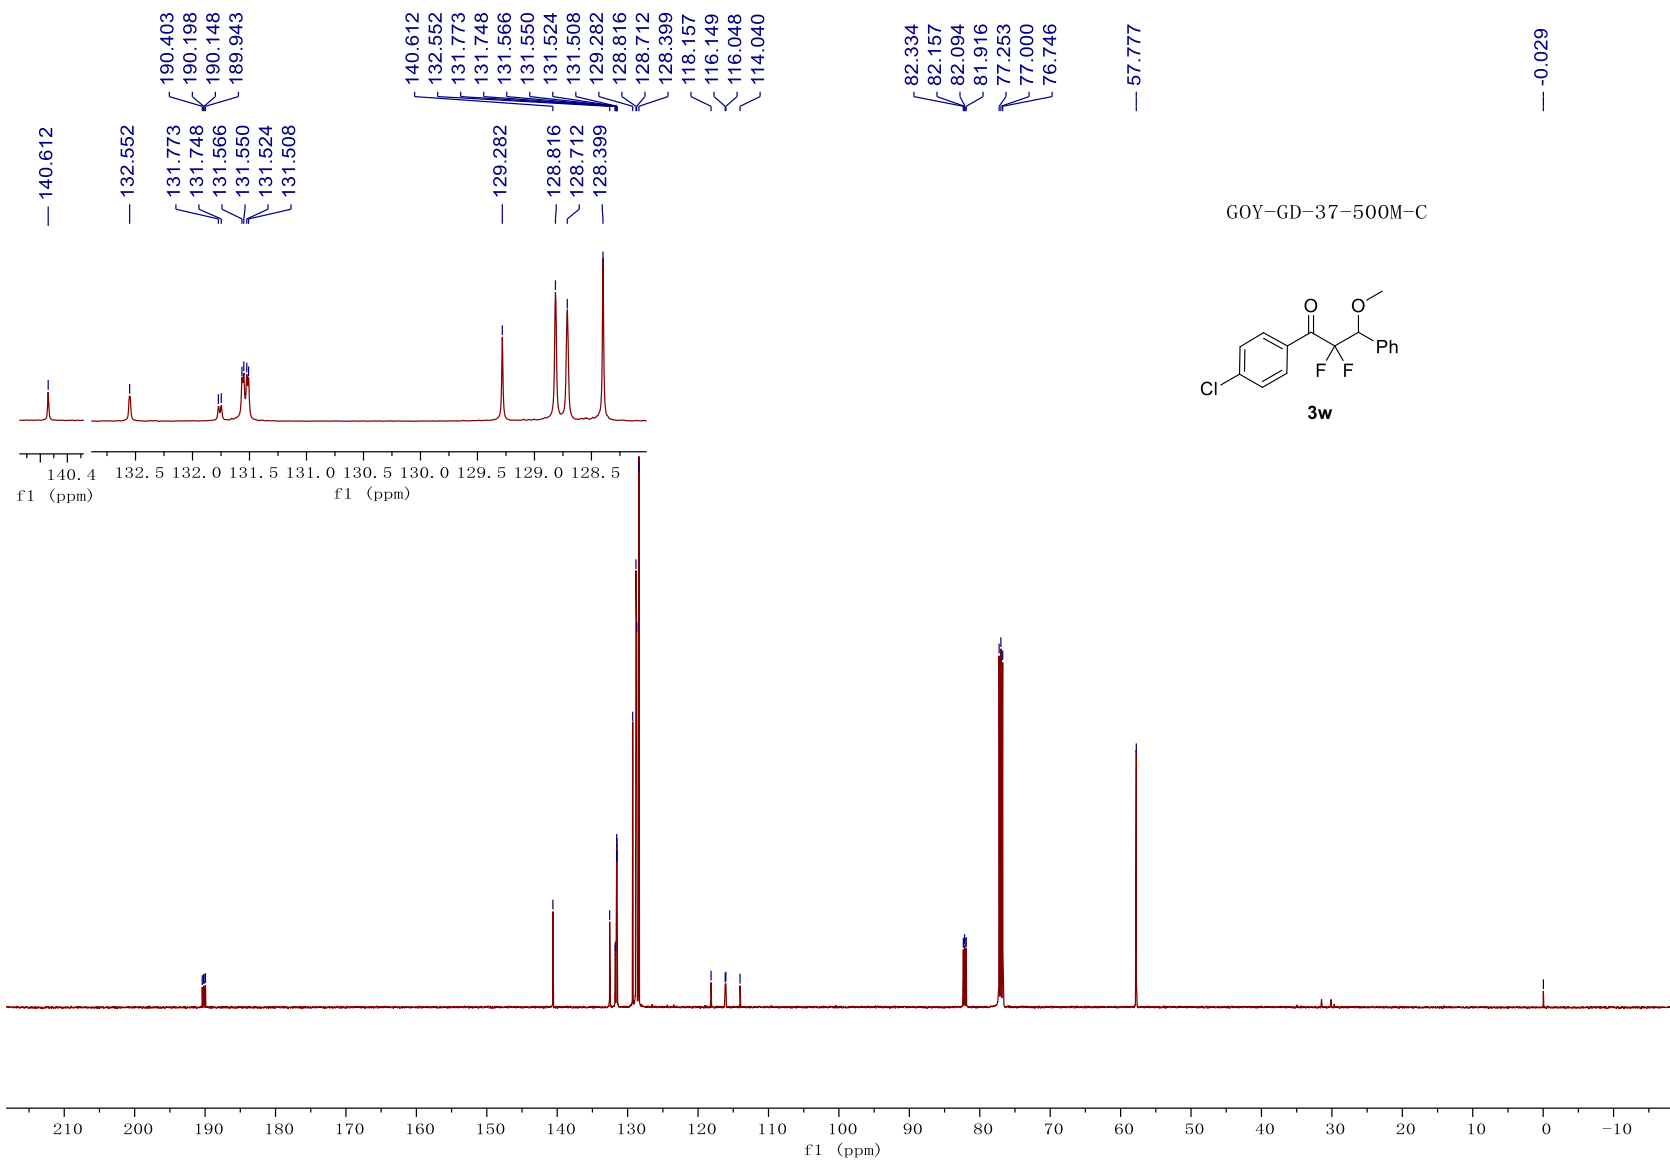

GOY-GA-37-400M-F

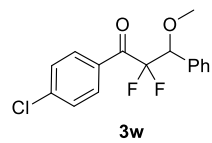

— -103.543  
— -104.269

— -117.179  
— -117.905

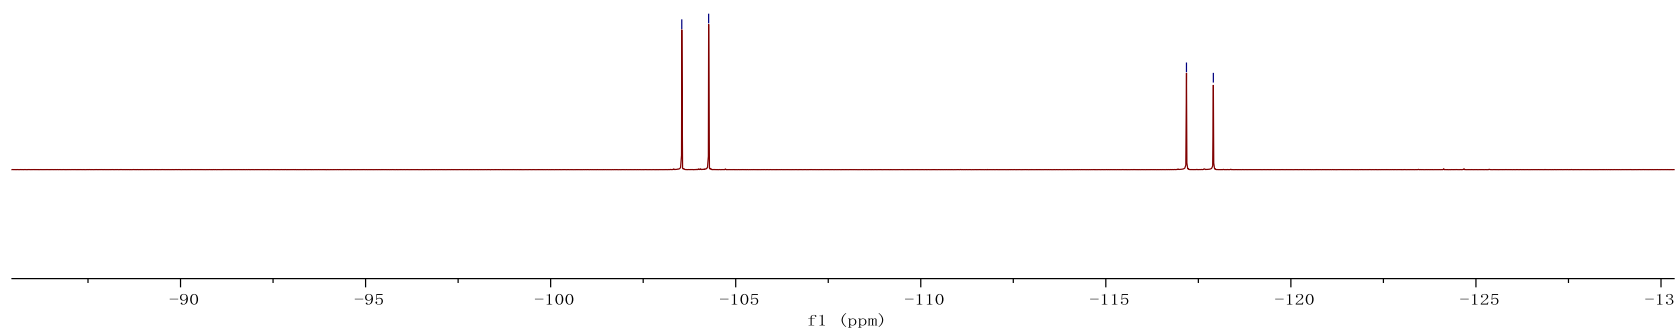

7.975  
7.949  
7.496  
7.482  
7.470  
7.464  
7.451  
7.433  
7.420  
7.415  
7.405  
7.397  
7.289  
7.260

4.900  
4.880  
4.837  
4.817

— 3.288

— 2.429

— 1.551

— 0.001

7.496  
7.482  
7.470  
7.464  
7.451  
7.433  
7.420  
7.415  
7.405  
7.397  
7.289  
7.260

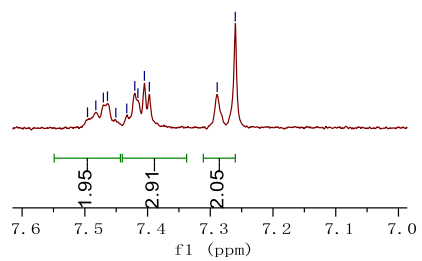

TYP-TB-59-300M-H

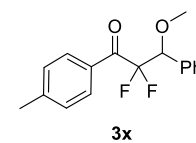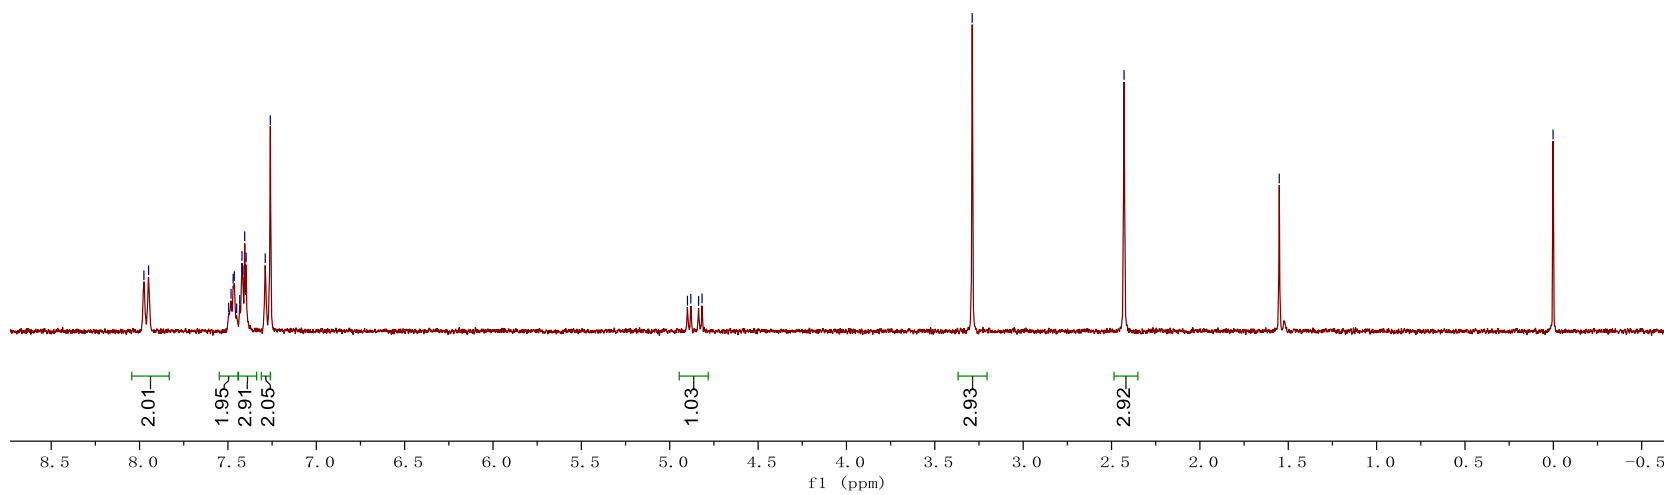

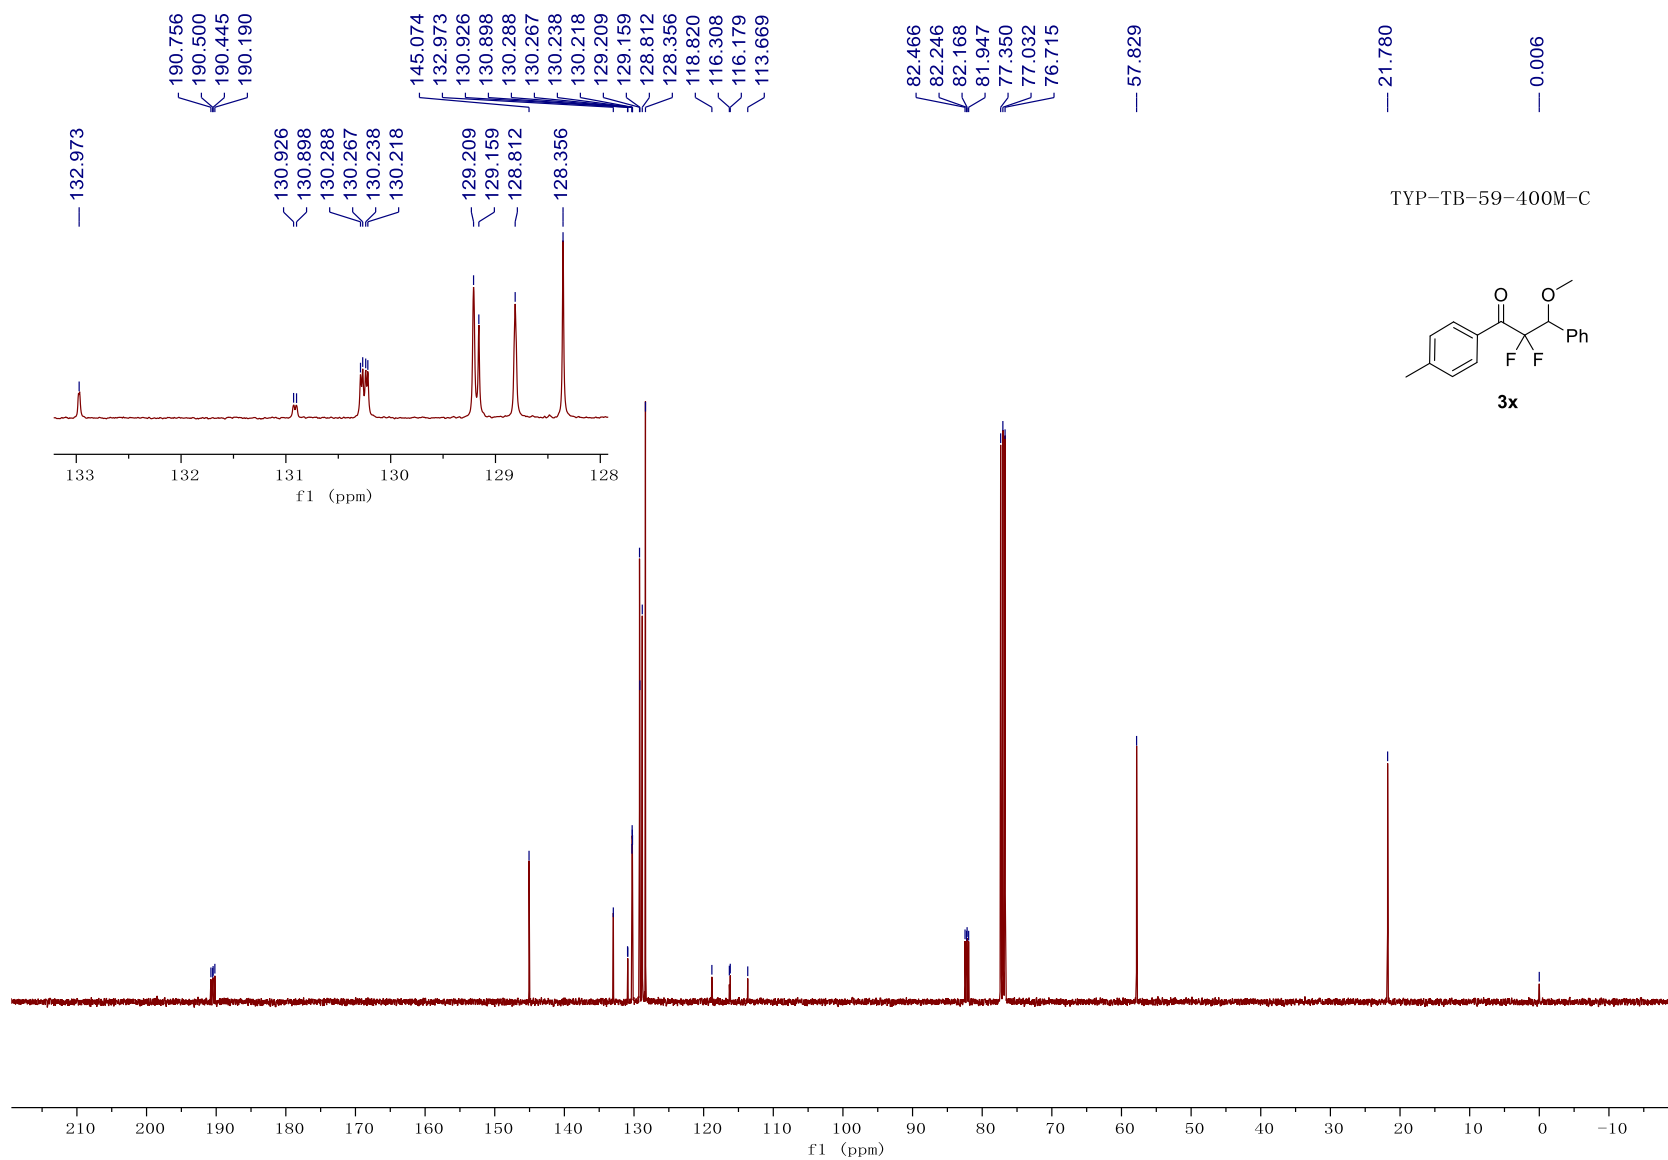

TYP-TB-59-300M-F

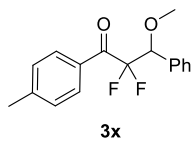

-103.540  
-103.558  
-104.510  
-104.528  
-117.066  
-117.125  
-118.035  
-118.095

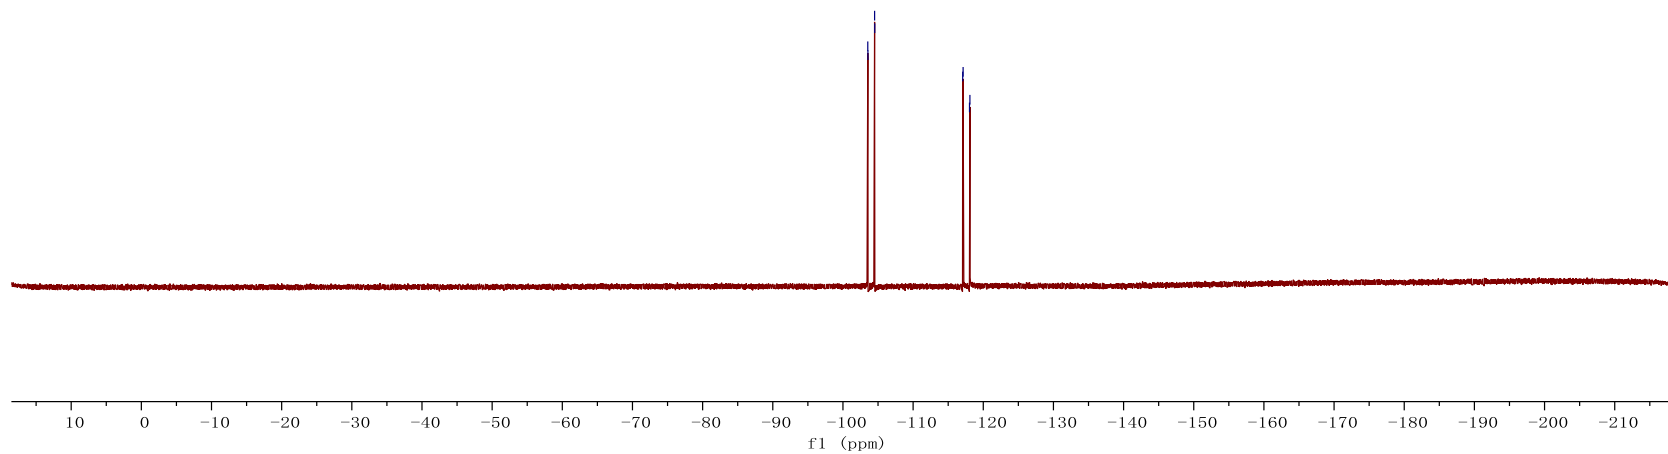

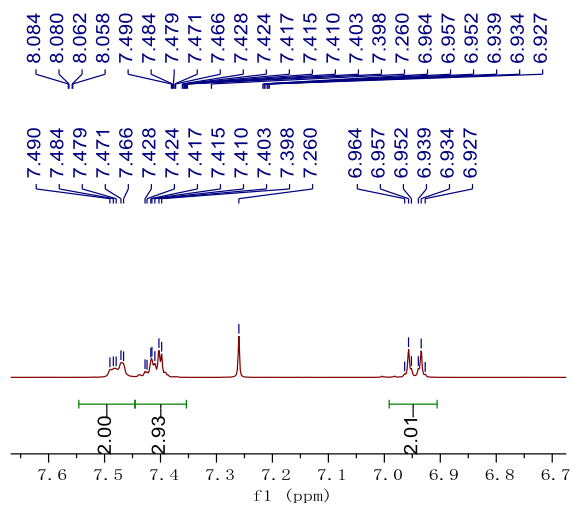

4.889  
4.874  
4.842  
4.827

— 3.886

— 3.297

— 1.573

— 0.003

TYP-TB-91-400M-H

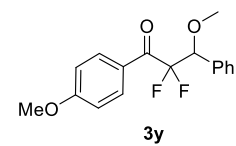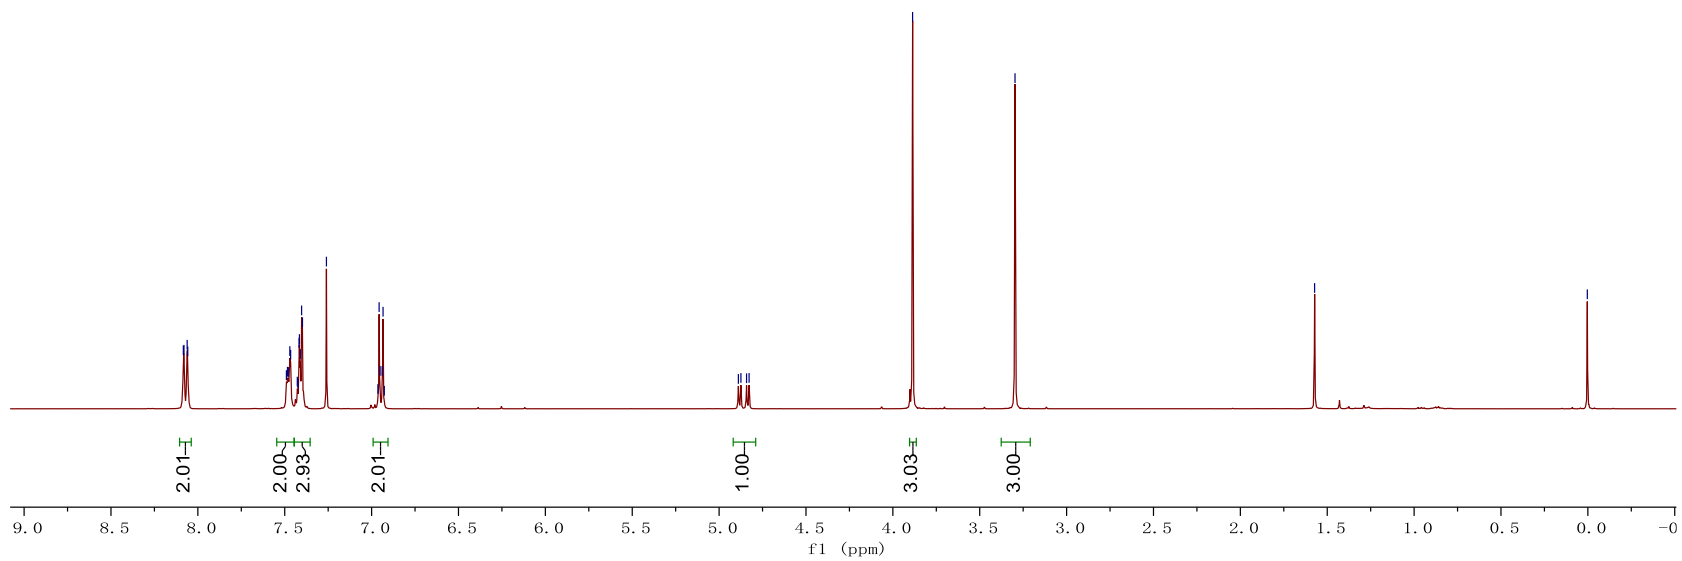



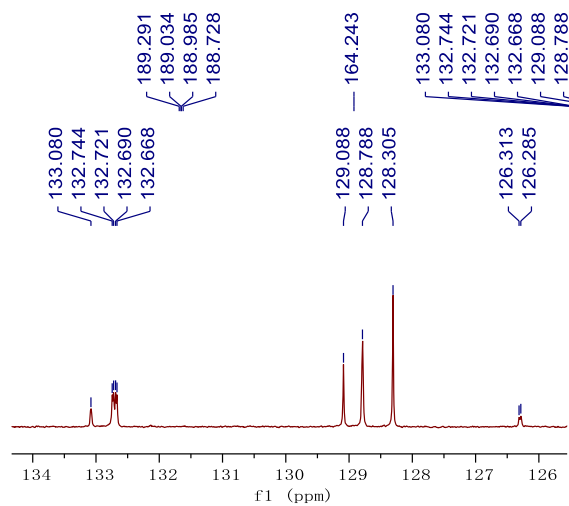

TYP-TB-91-400M-C

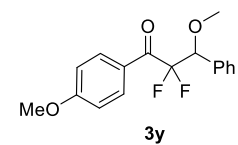

-0.031

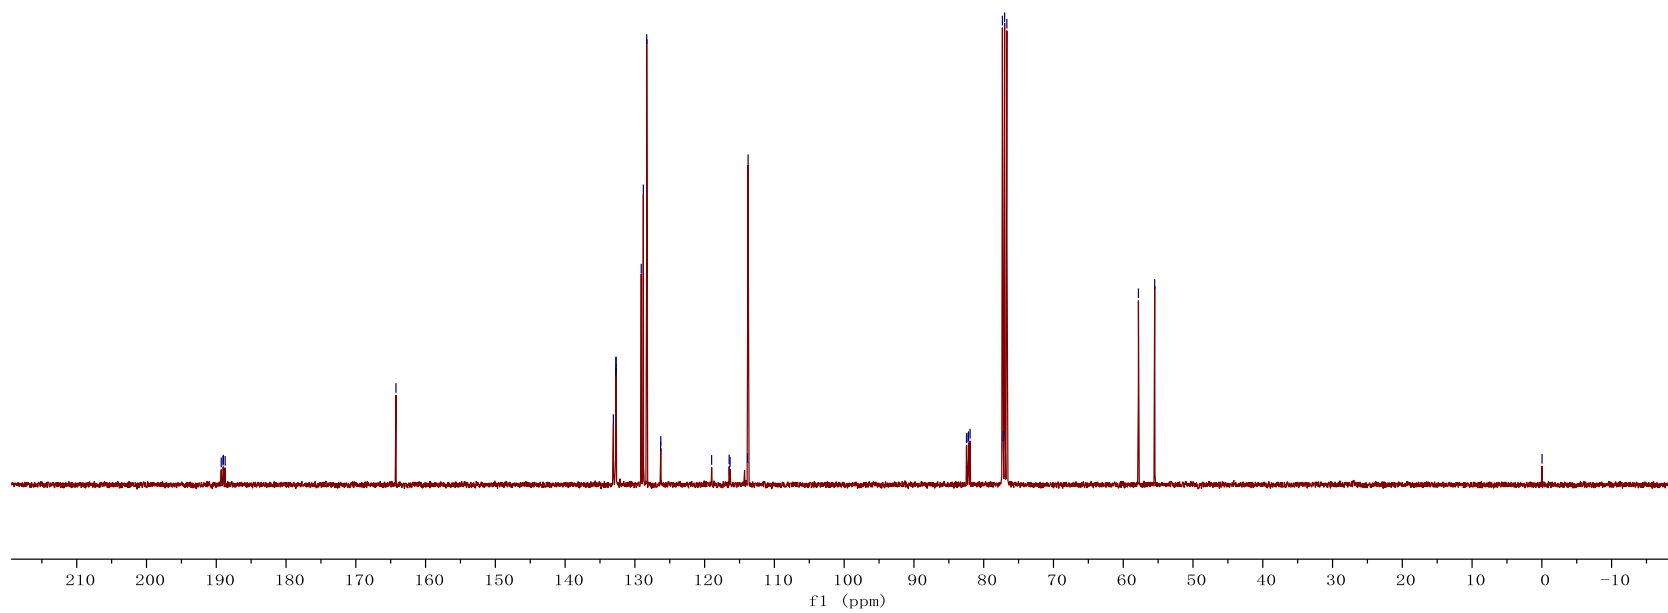

TYP-TB-91-400M-F

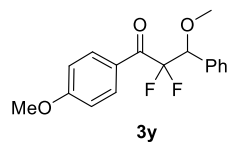

-103.596  
-104.323  
-116.519  
-117.245

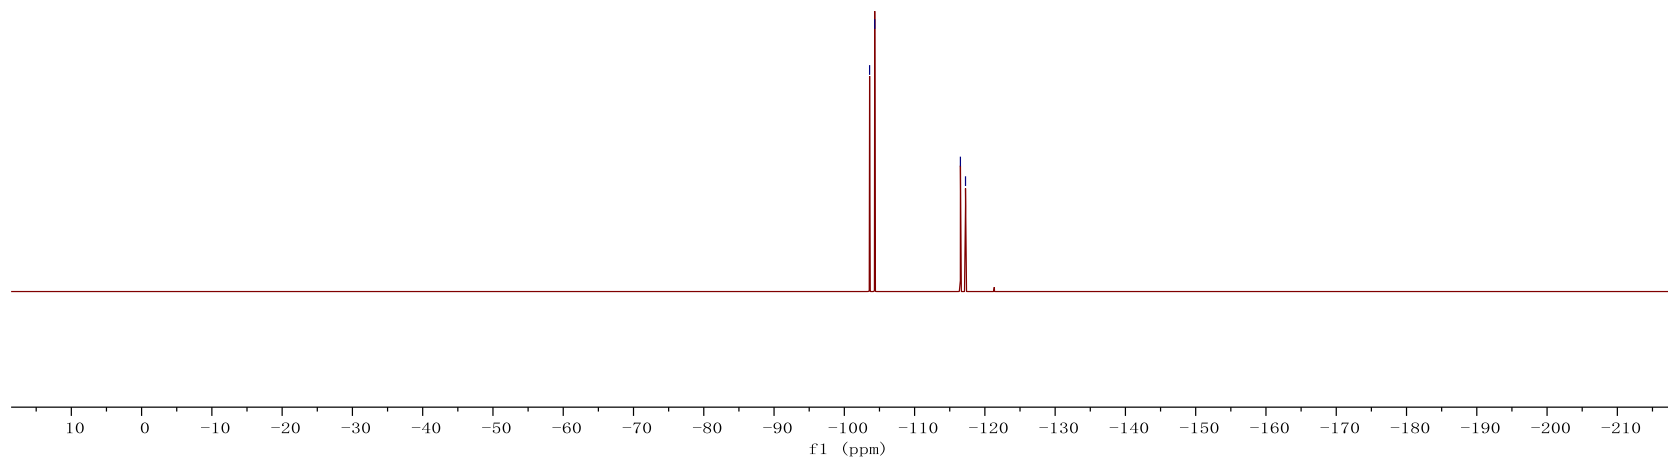

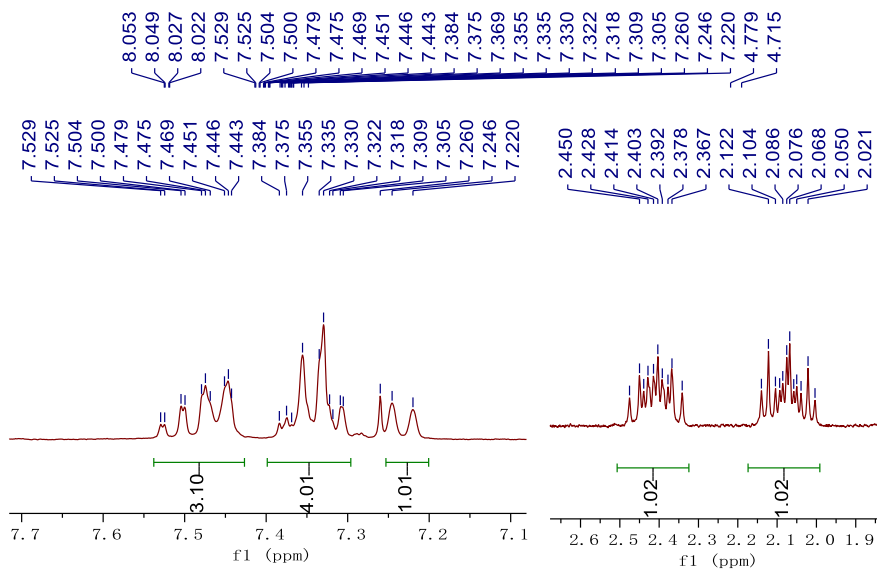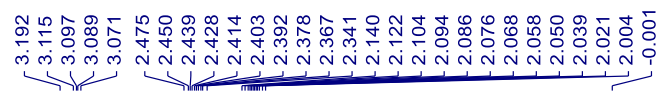

TYP-TB-81-300M-H

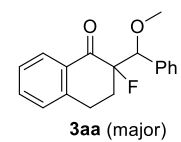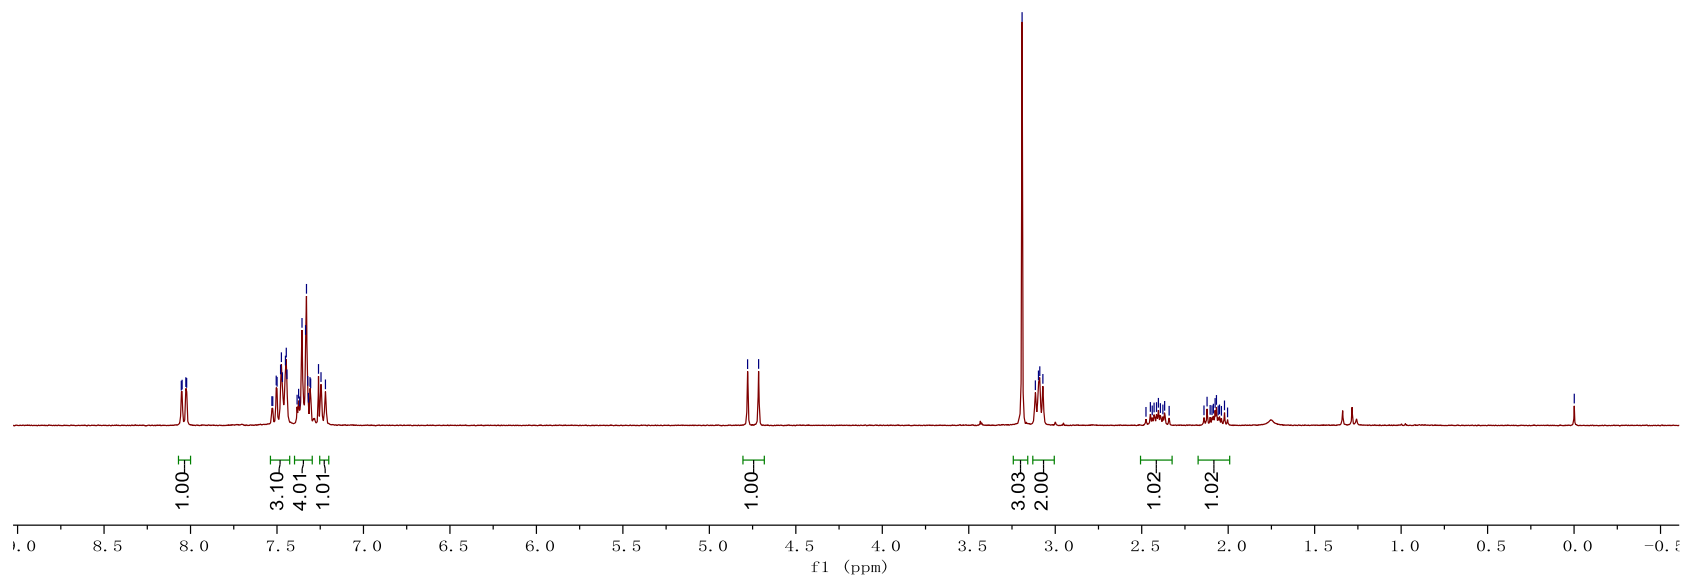

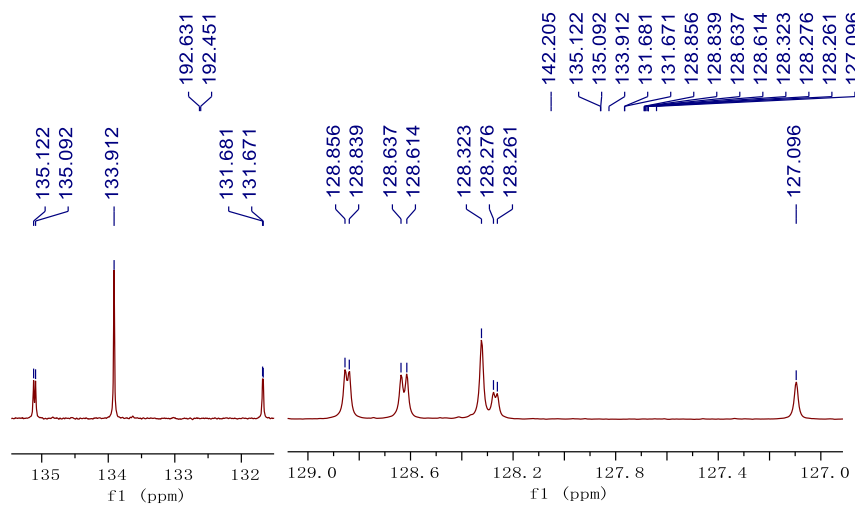

TYP-TB-81-400M-C

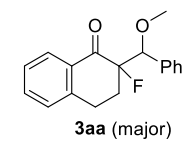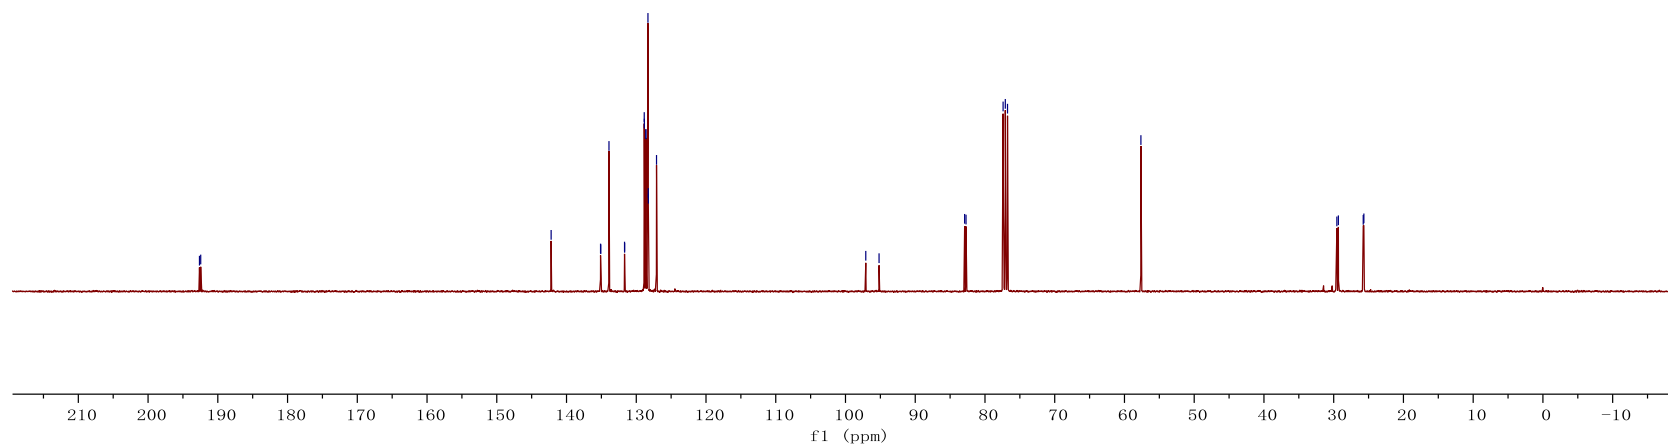

TYP-TB-81-300M-F

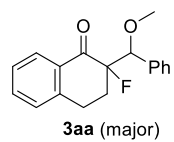

— -169.332

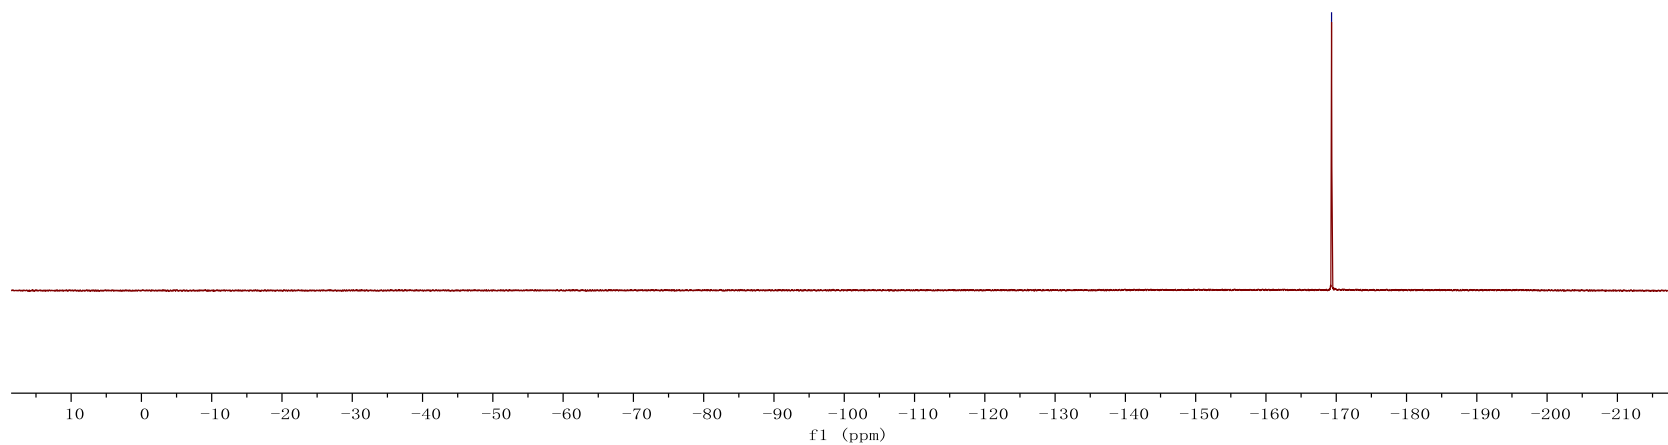

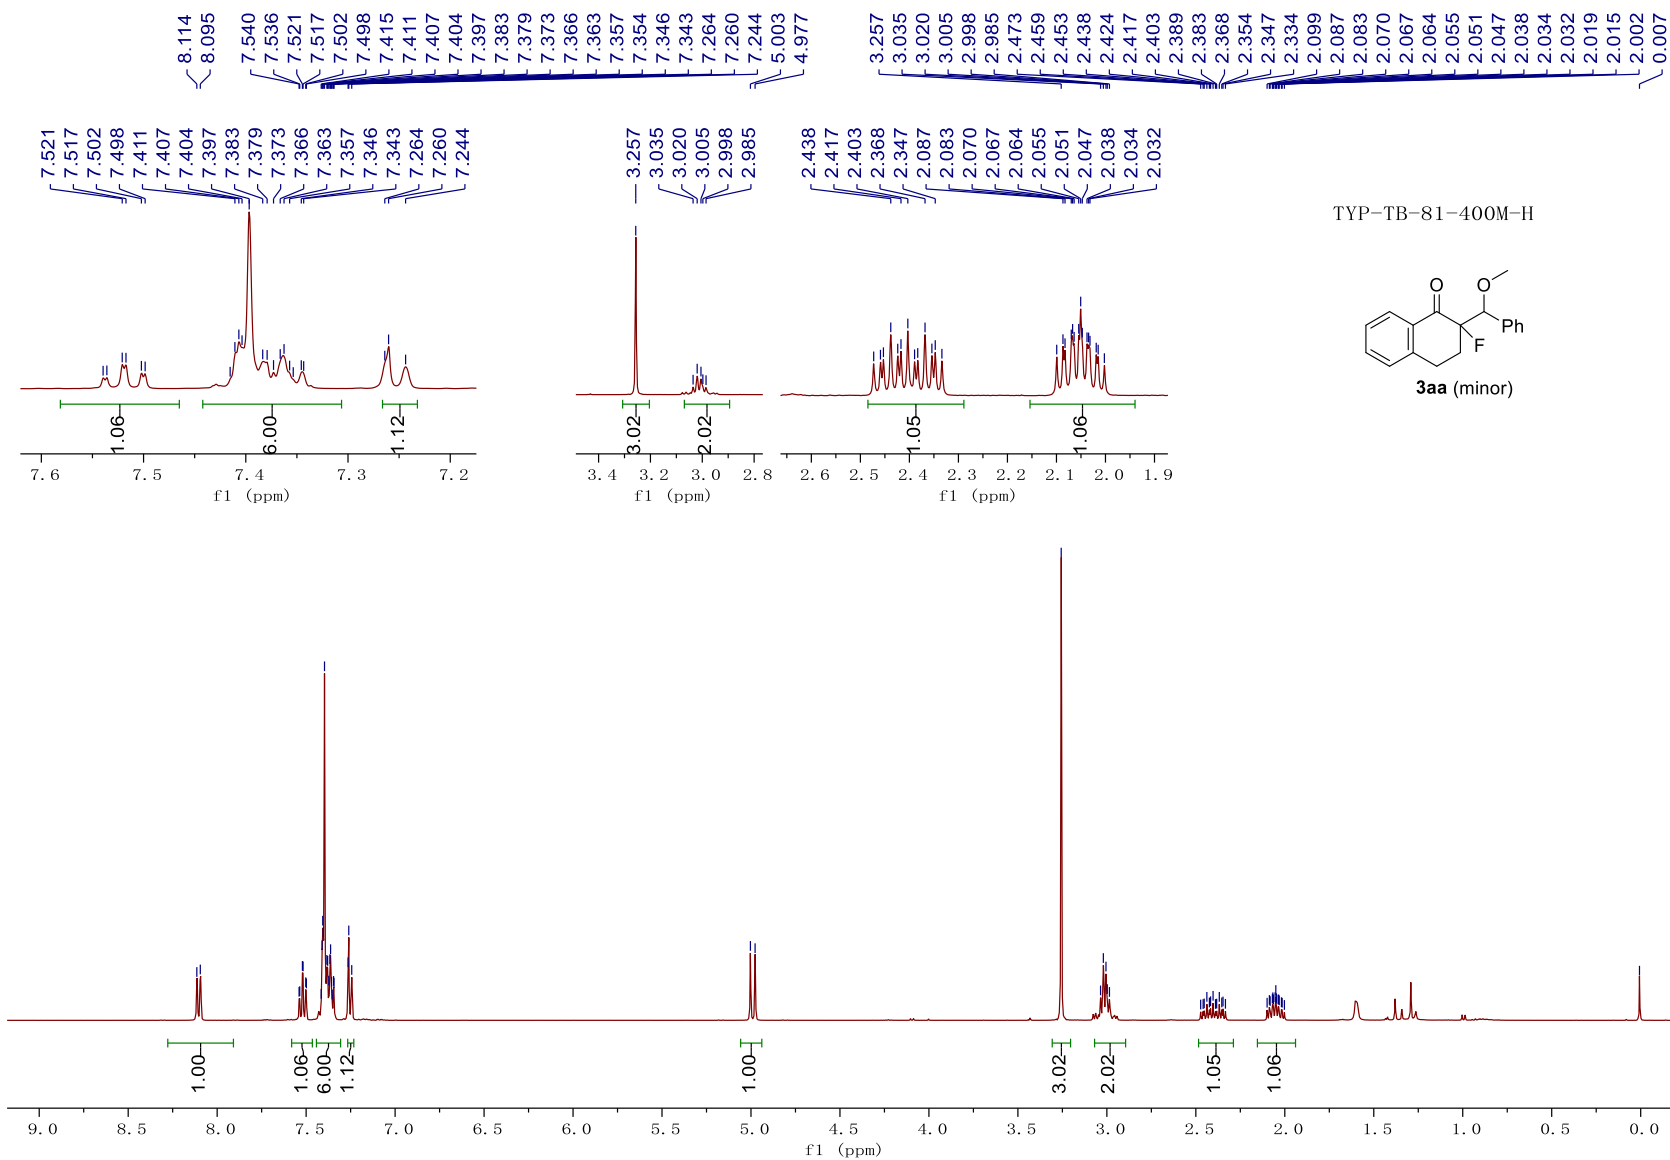

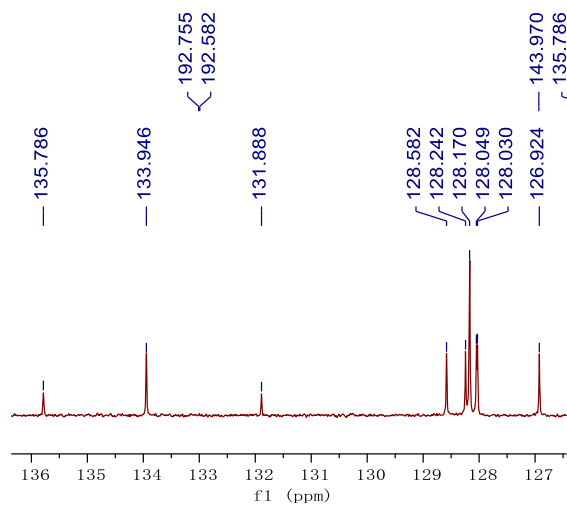

143.970  
135.786  
133.946  
131.888  
128.582  
128.242  
128.170  
128.049  
128.030  
126.924

94.113  
92.309  
82.746  
82.462  
77.345  
77.028  
76.711

57.922

28.104  
27.887  
24.717  
24.647

TYP-TB-81-400M-H

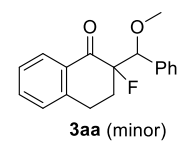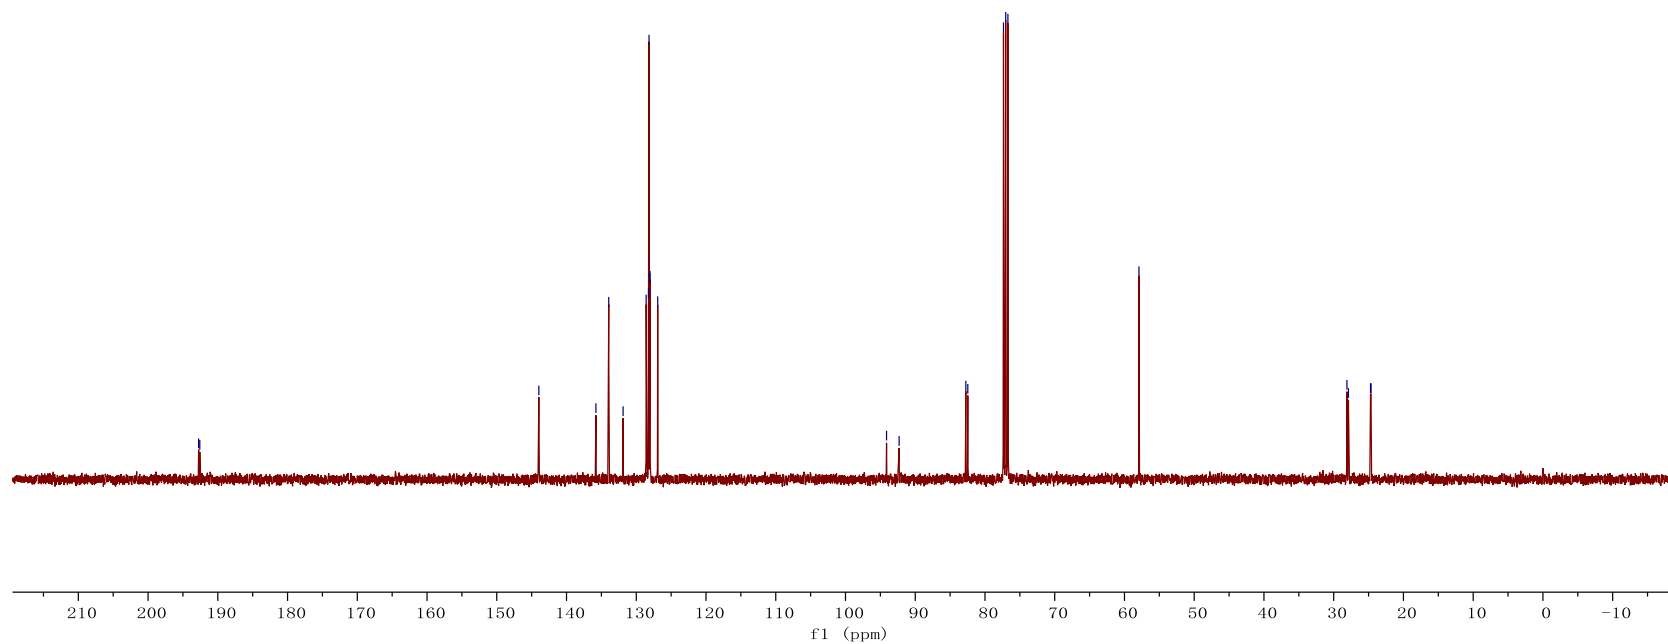

TYP-TB-81-400M-F

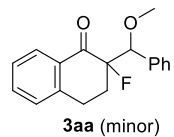

— -161.594

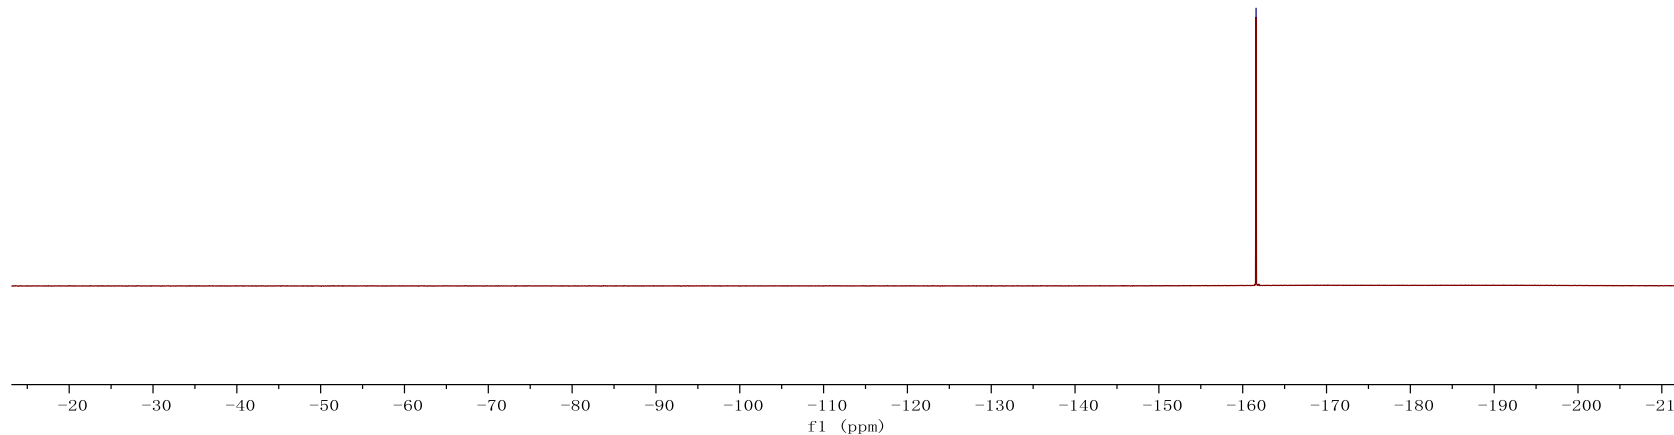



7.856  
7.836  
7.632  
7.614  
7.595  
7.503  
7.481  
7.450  
7.433  
7.415  
7.396  
7.383  
7.260

4.901  
4.884

3.679  
3.634  
3.589

3.238

2.858  
2.813  
2.793  
2.748

7.632  
7.614  
7.595  
7.503  
7.481  
7.450  
7.433  
7.415  
7.396  
7.383

7.260

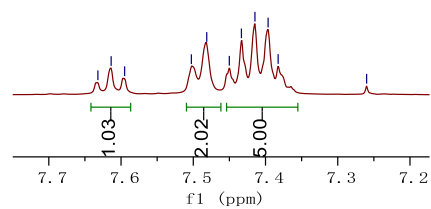

GOY-GA-38-400M-H

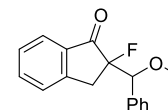

**3ab** (major)

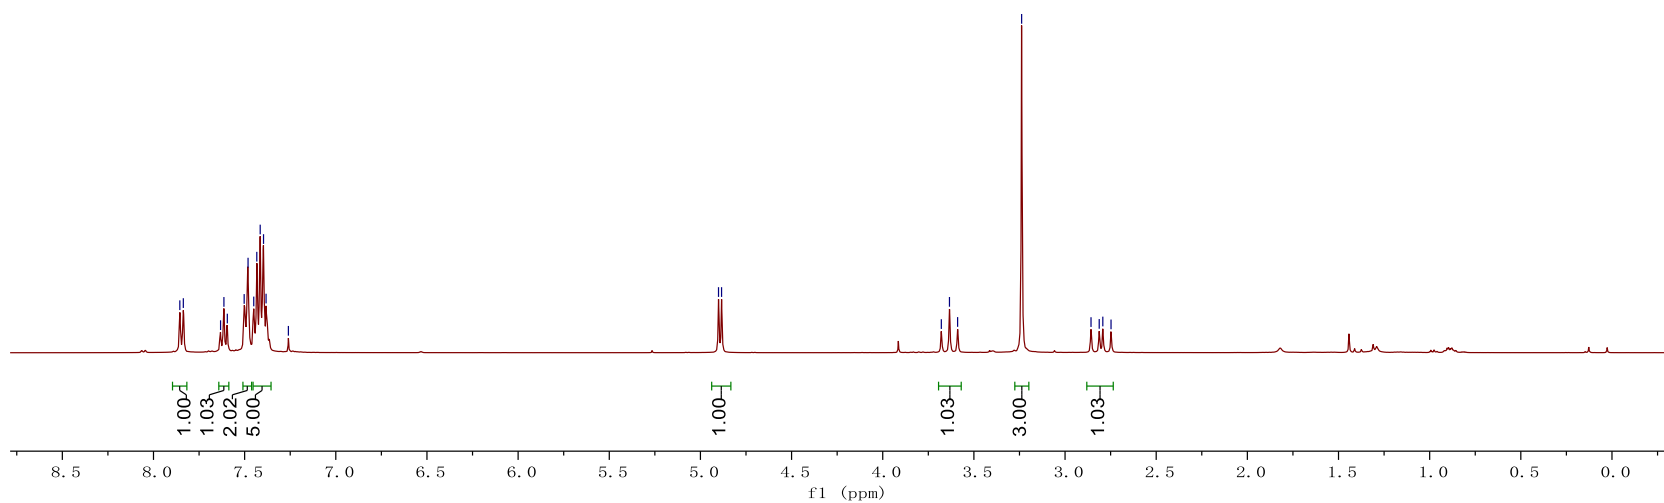

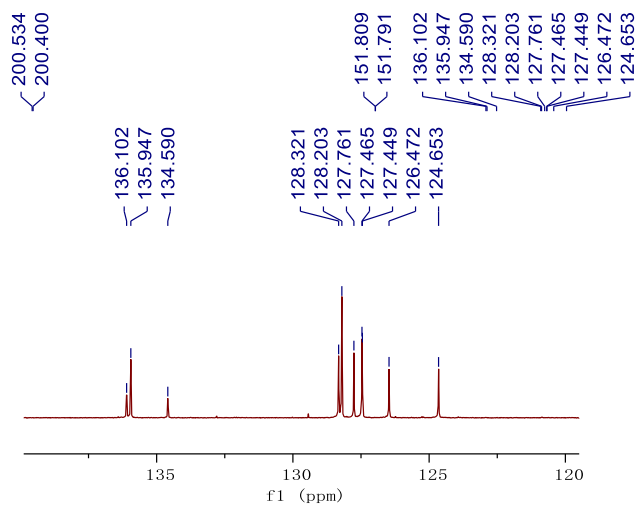

96.198  
94.719

81.362  
81.122  
77.246  
76.991  
76.737

57.447

33.867  
33.679

GOY-GD-38-500M-C

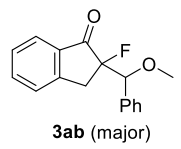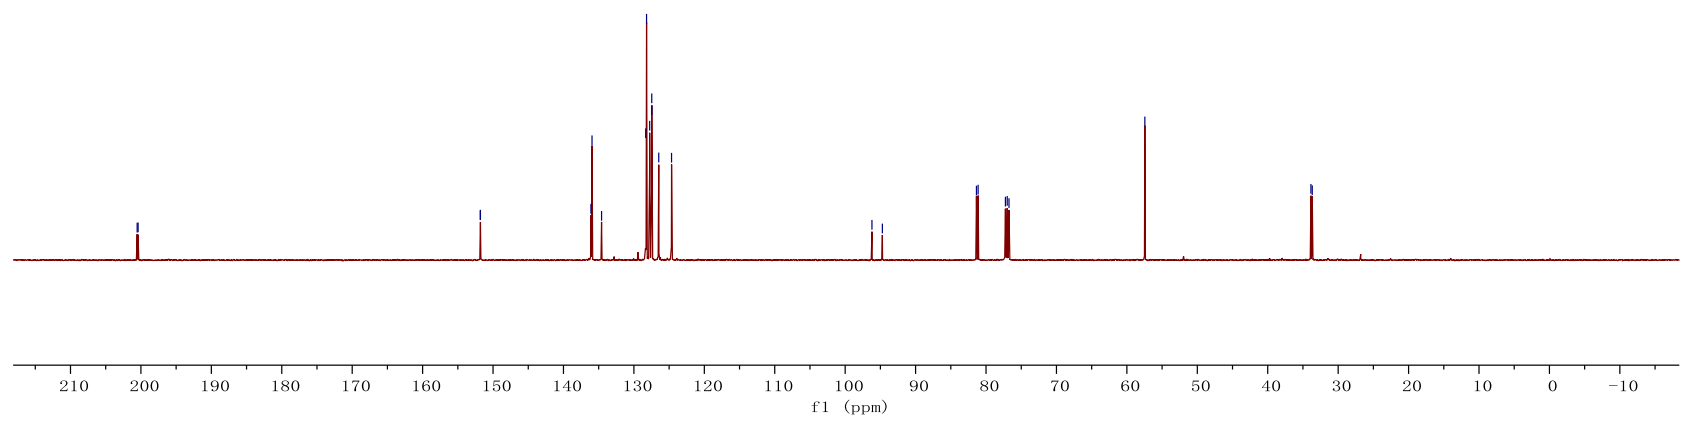

GOY-GA-38-400M-F

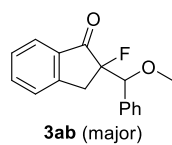

-156.882

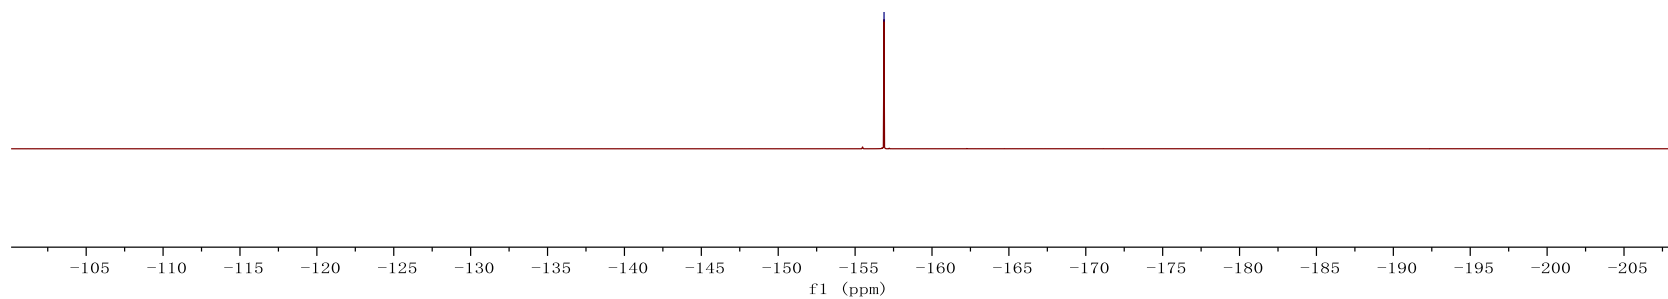

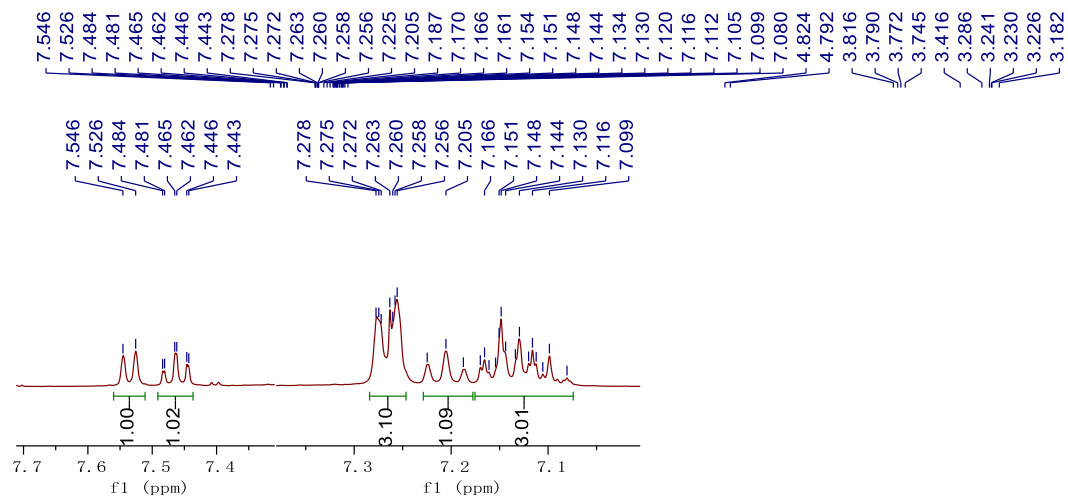

— 1.662

— -0.000

GOY-GD-38-400M-H

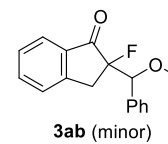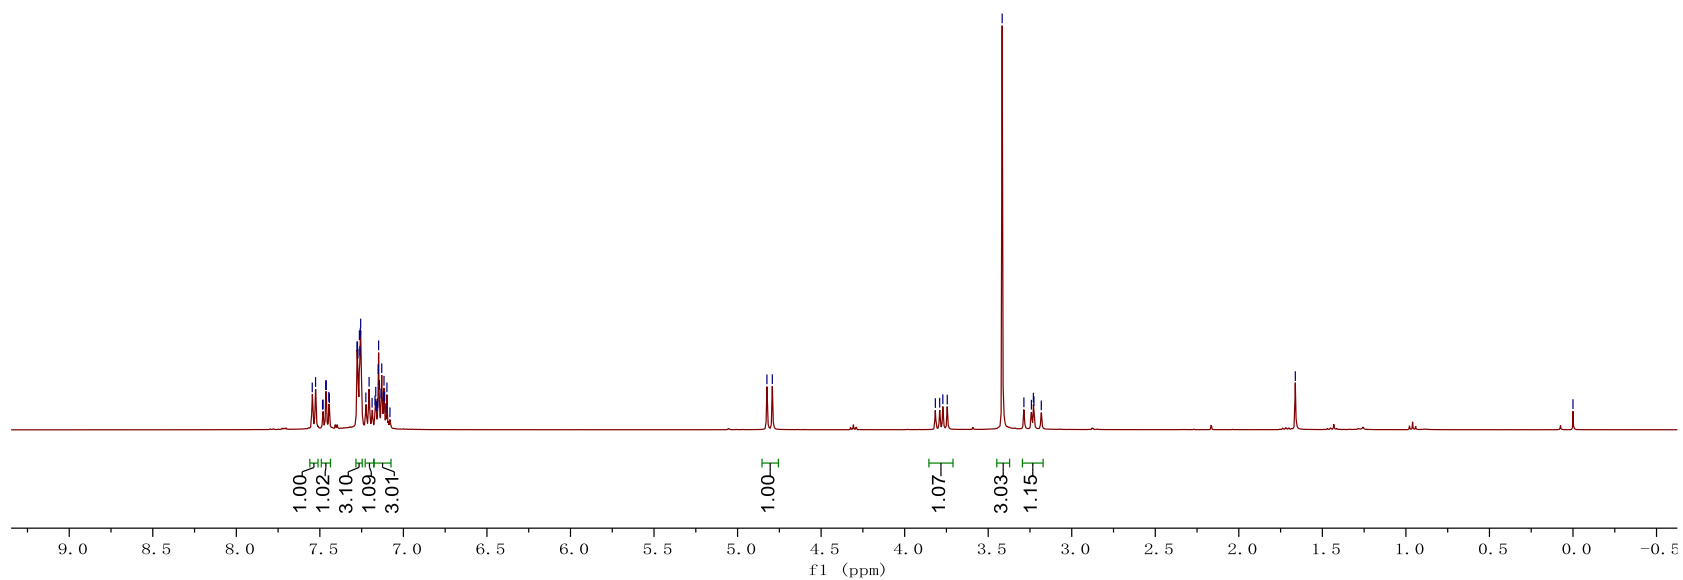

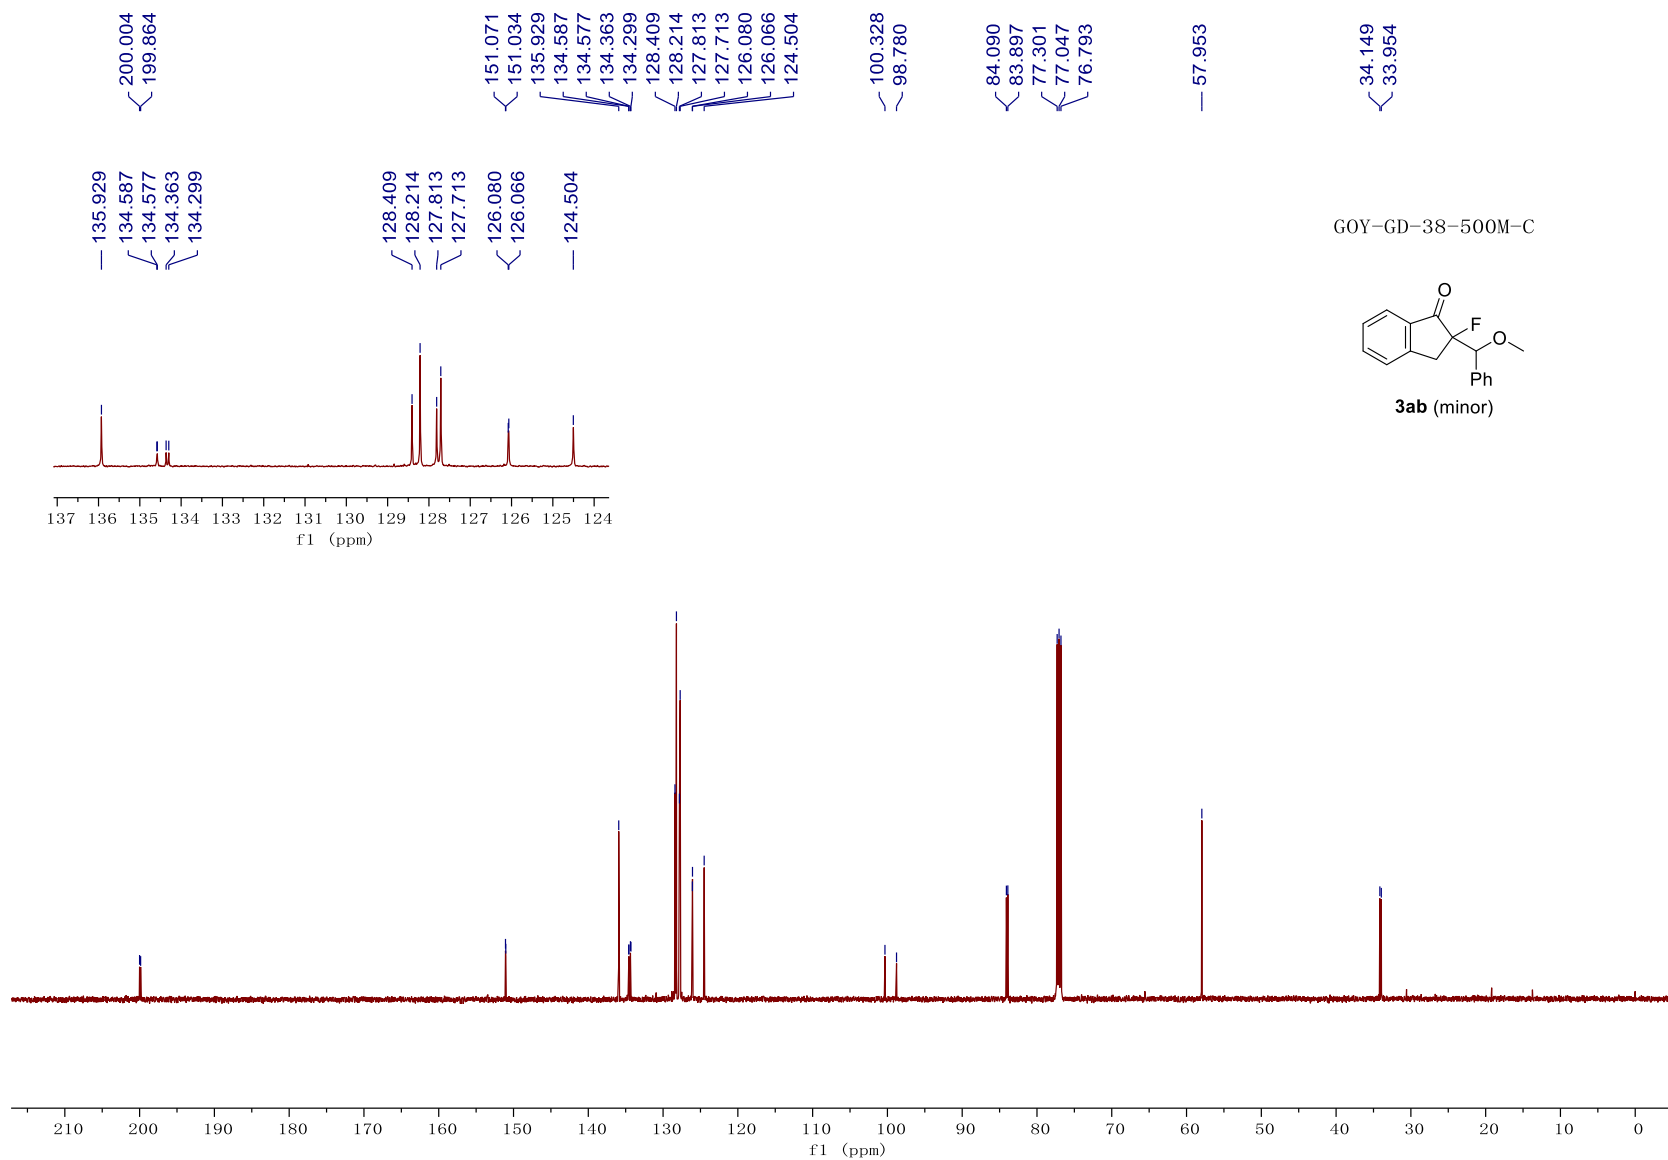

GOY-GD-38-400M-F

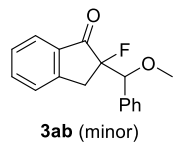

— -158.315

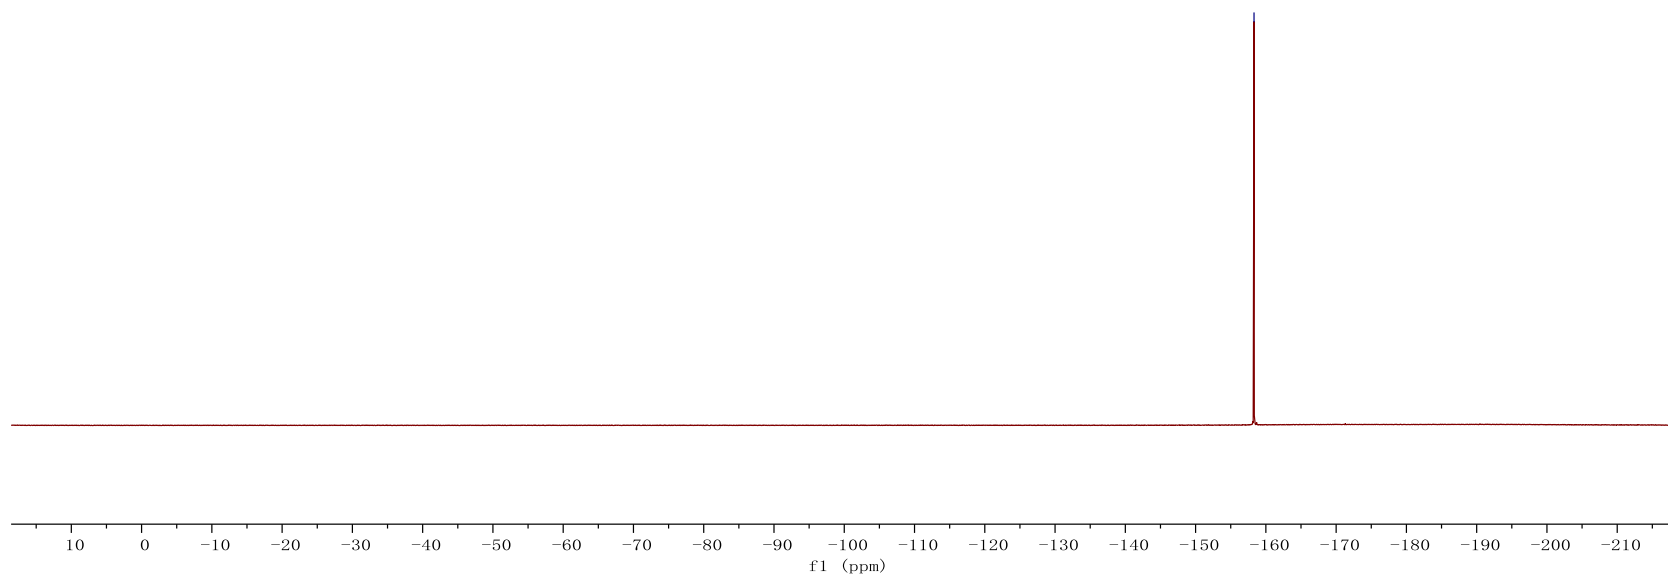

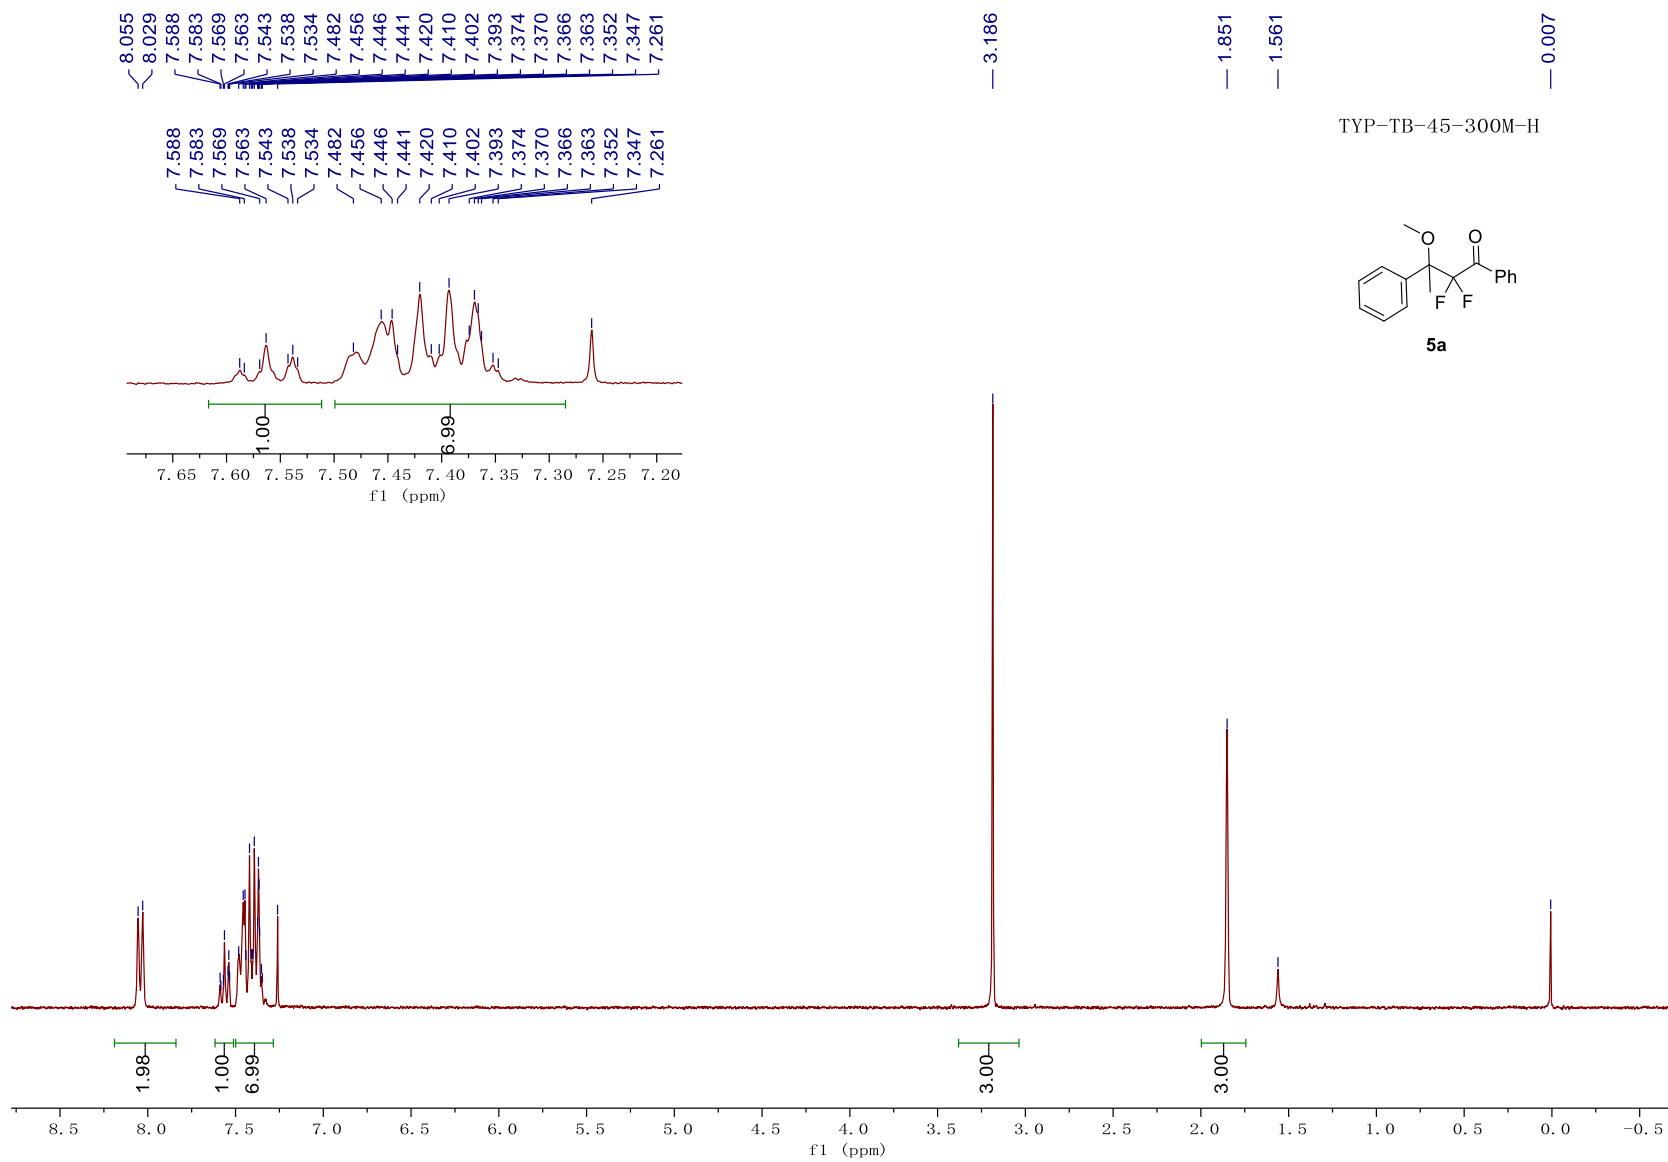

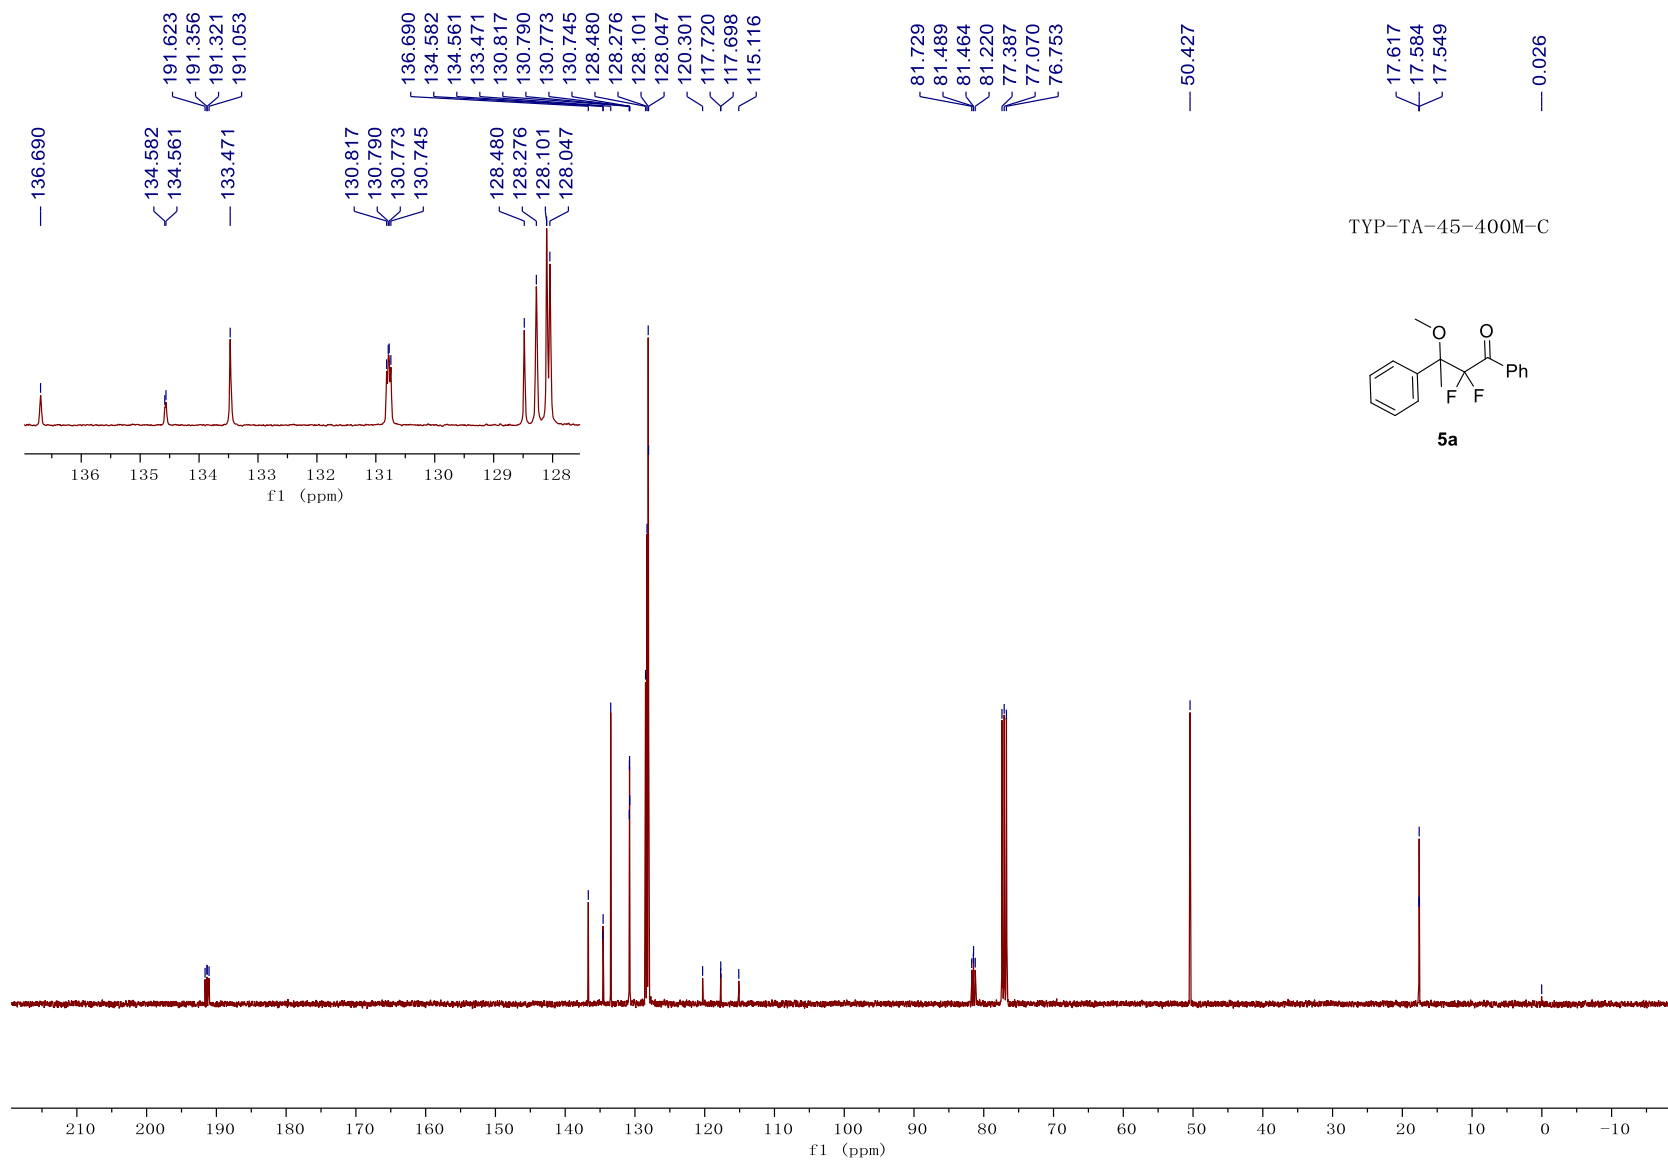



TYP-TB-45-300M-F

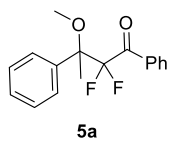

— -107.393  
— -108.289  
— -108.982  
— -109.878

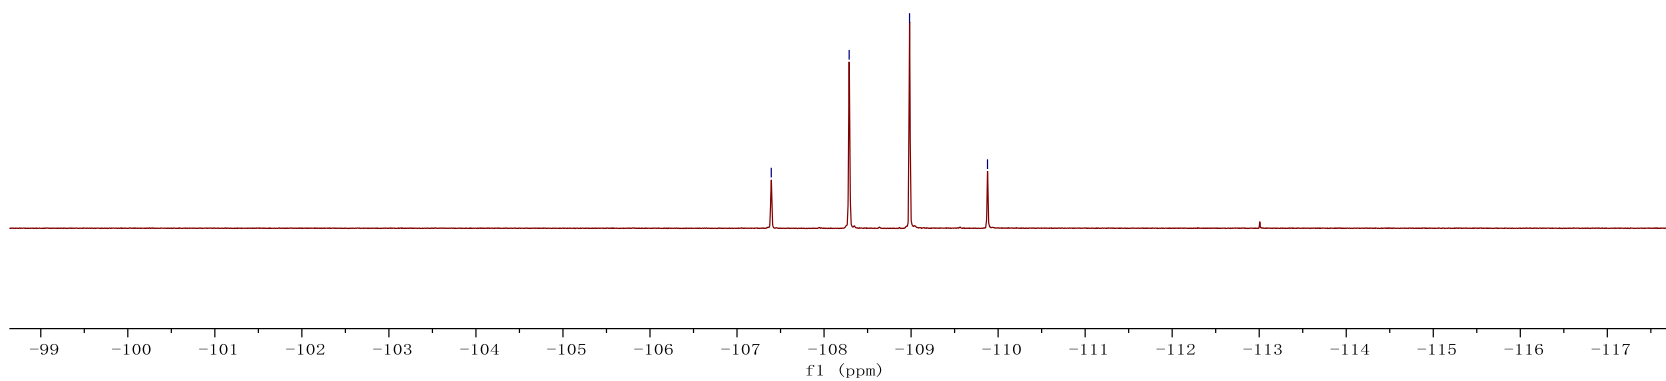

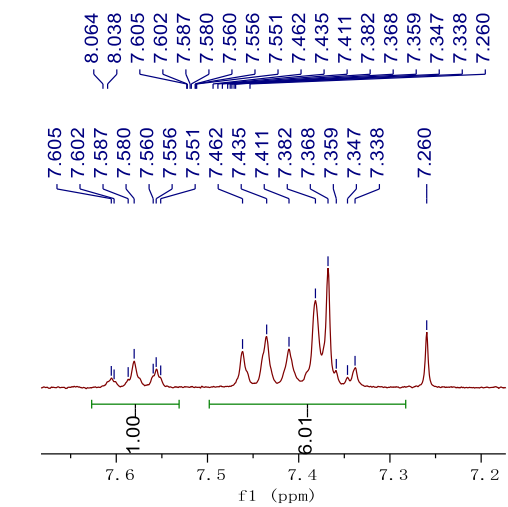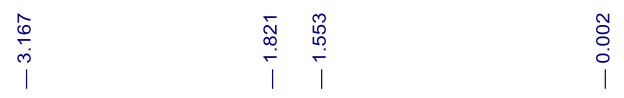

TYP-TB-51-300M-H

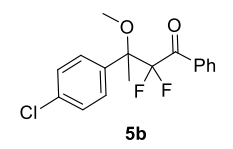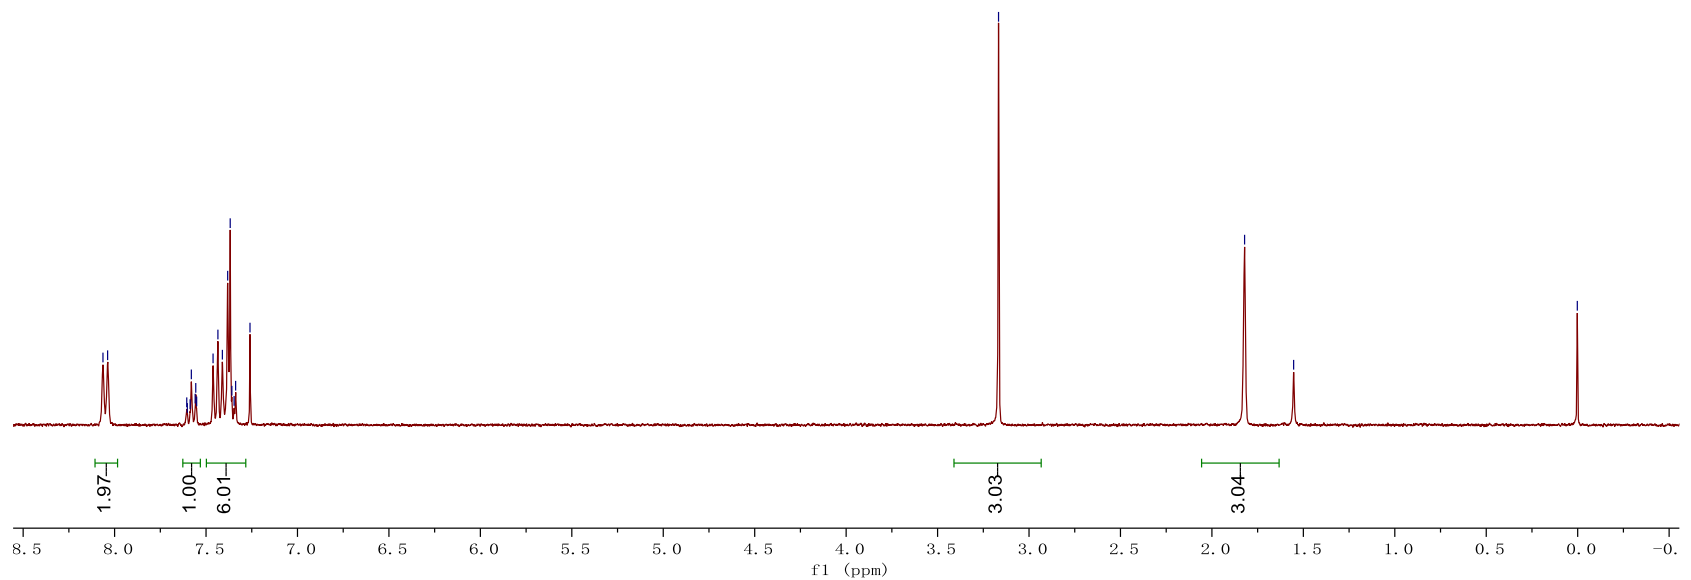

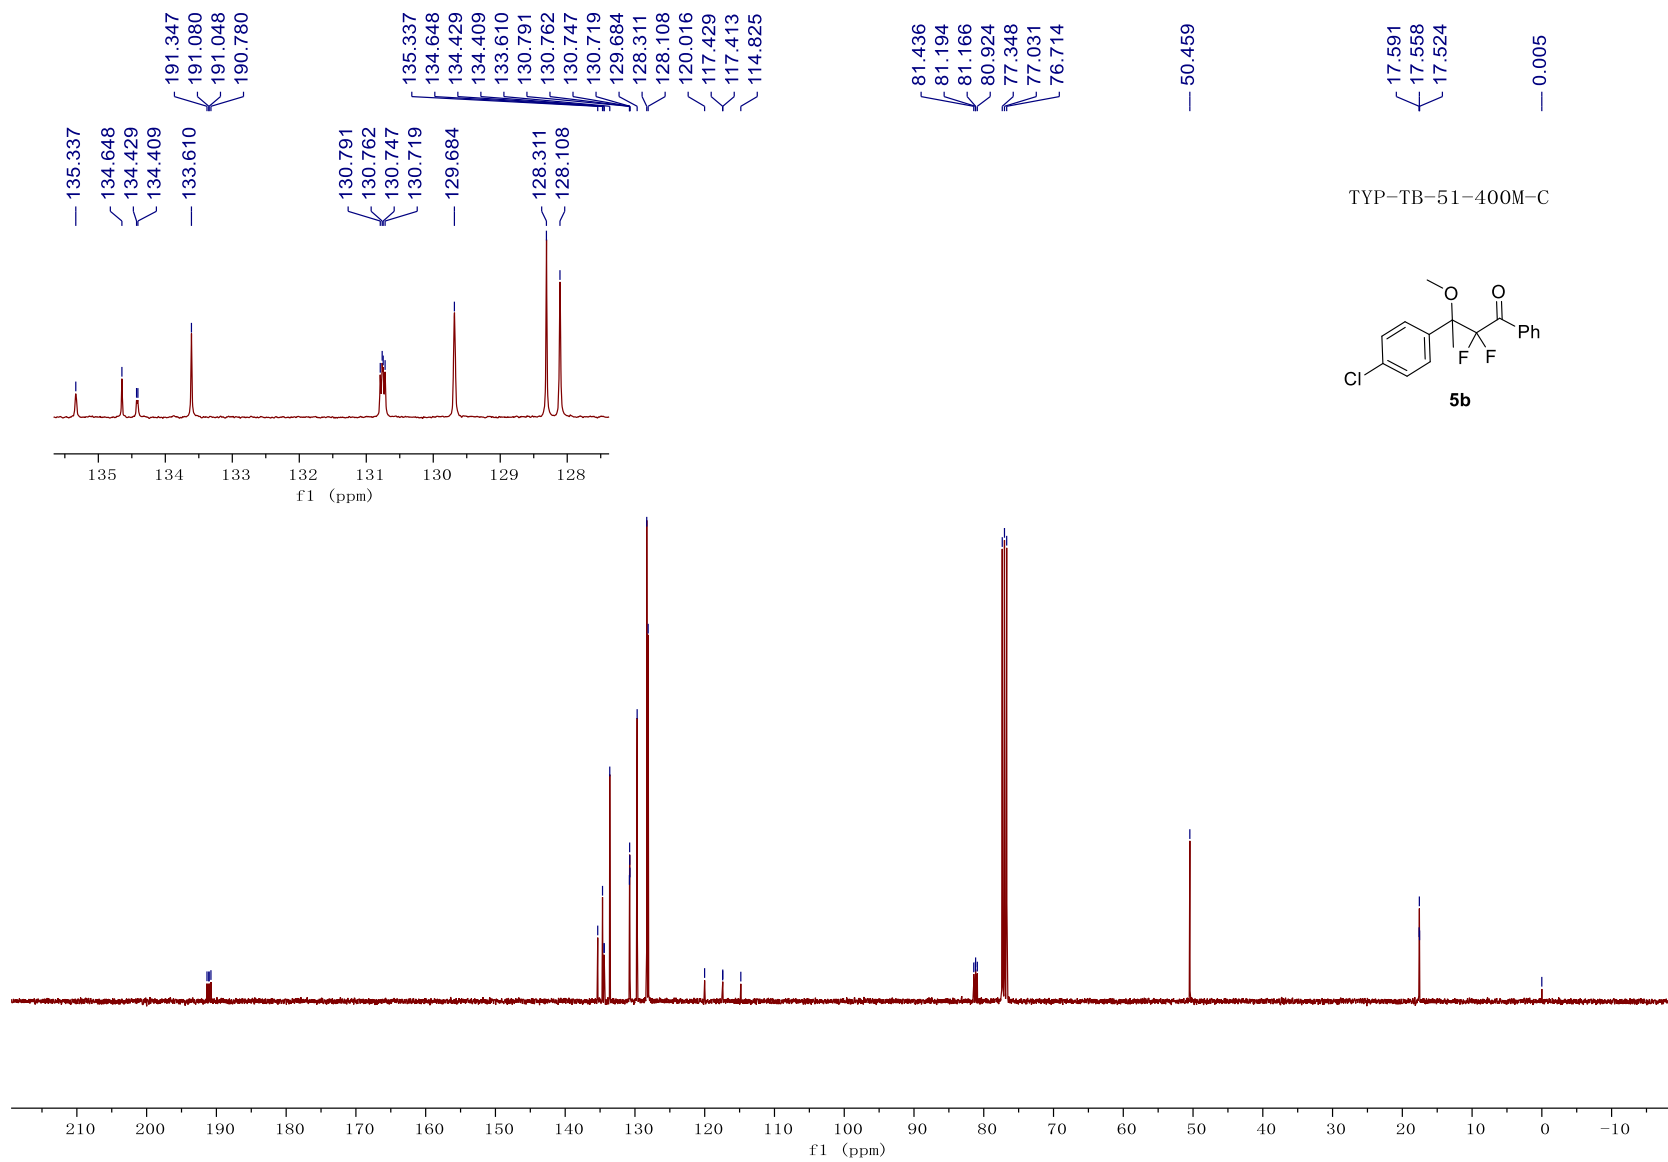

TYP-TB-51-300M-F

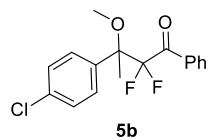

-107.414  
-108.314  
-108.973  
-109.872

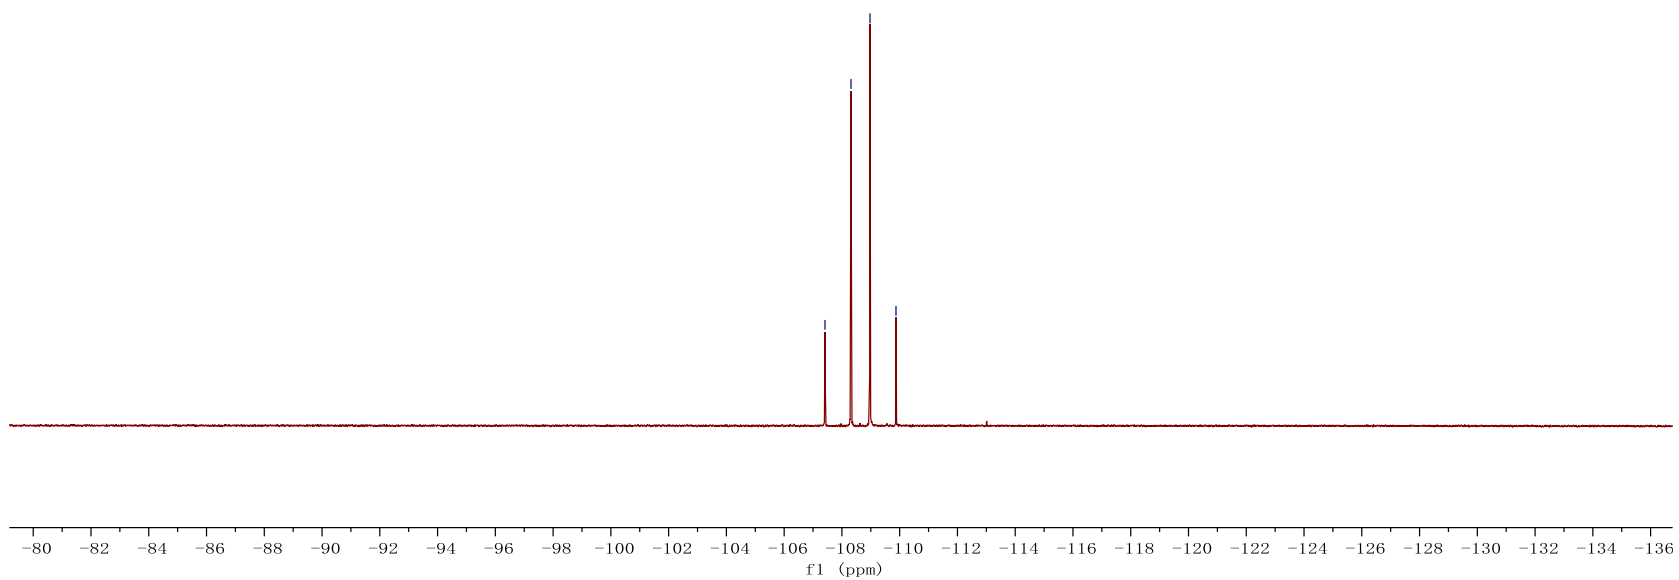

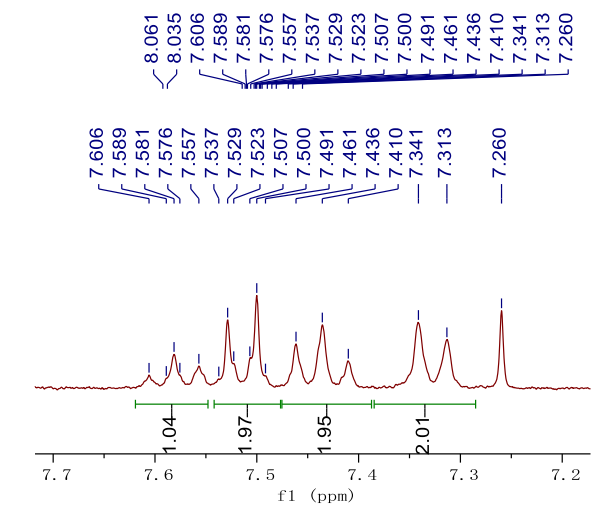

— 3.166

— 1.816

— 1.554

— 0.001

TYP-TB-47-300M-H

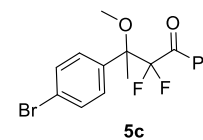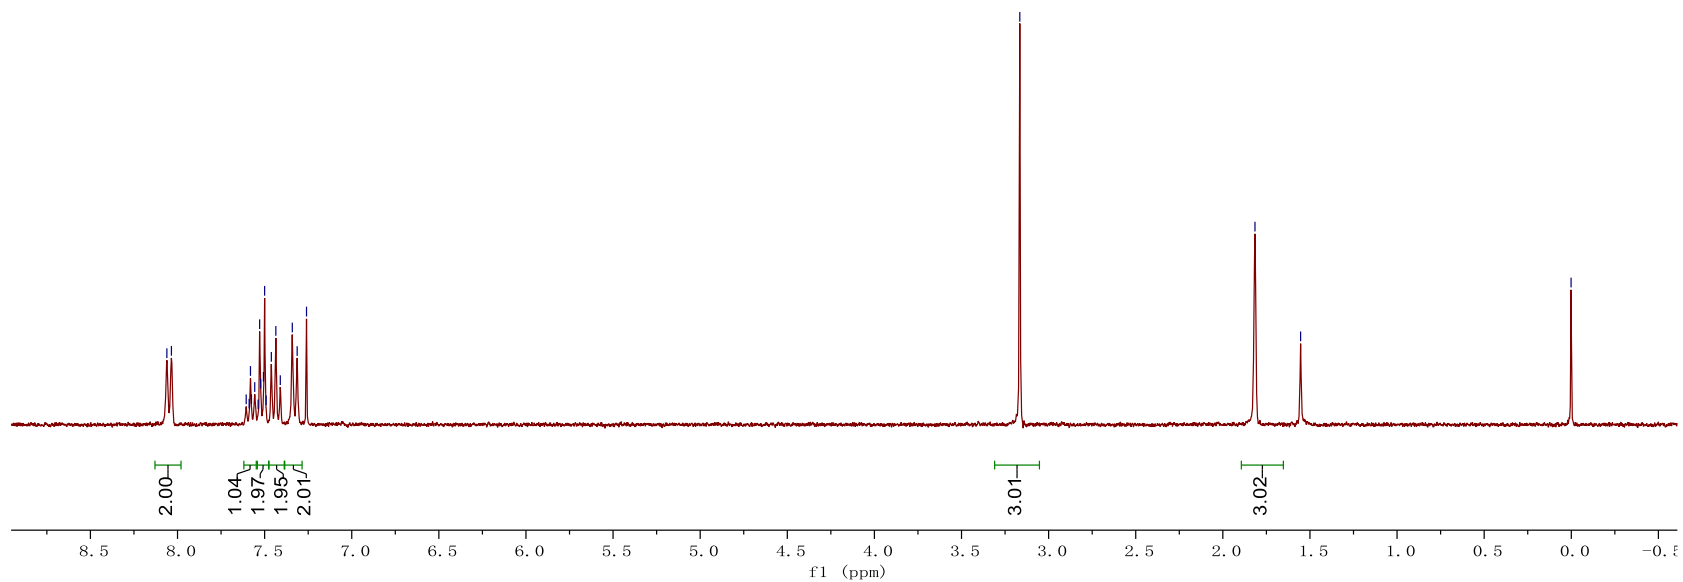

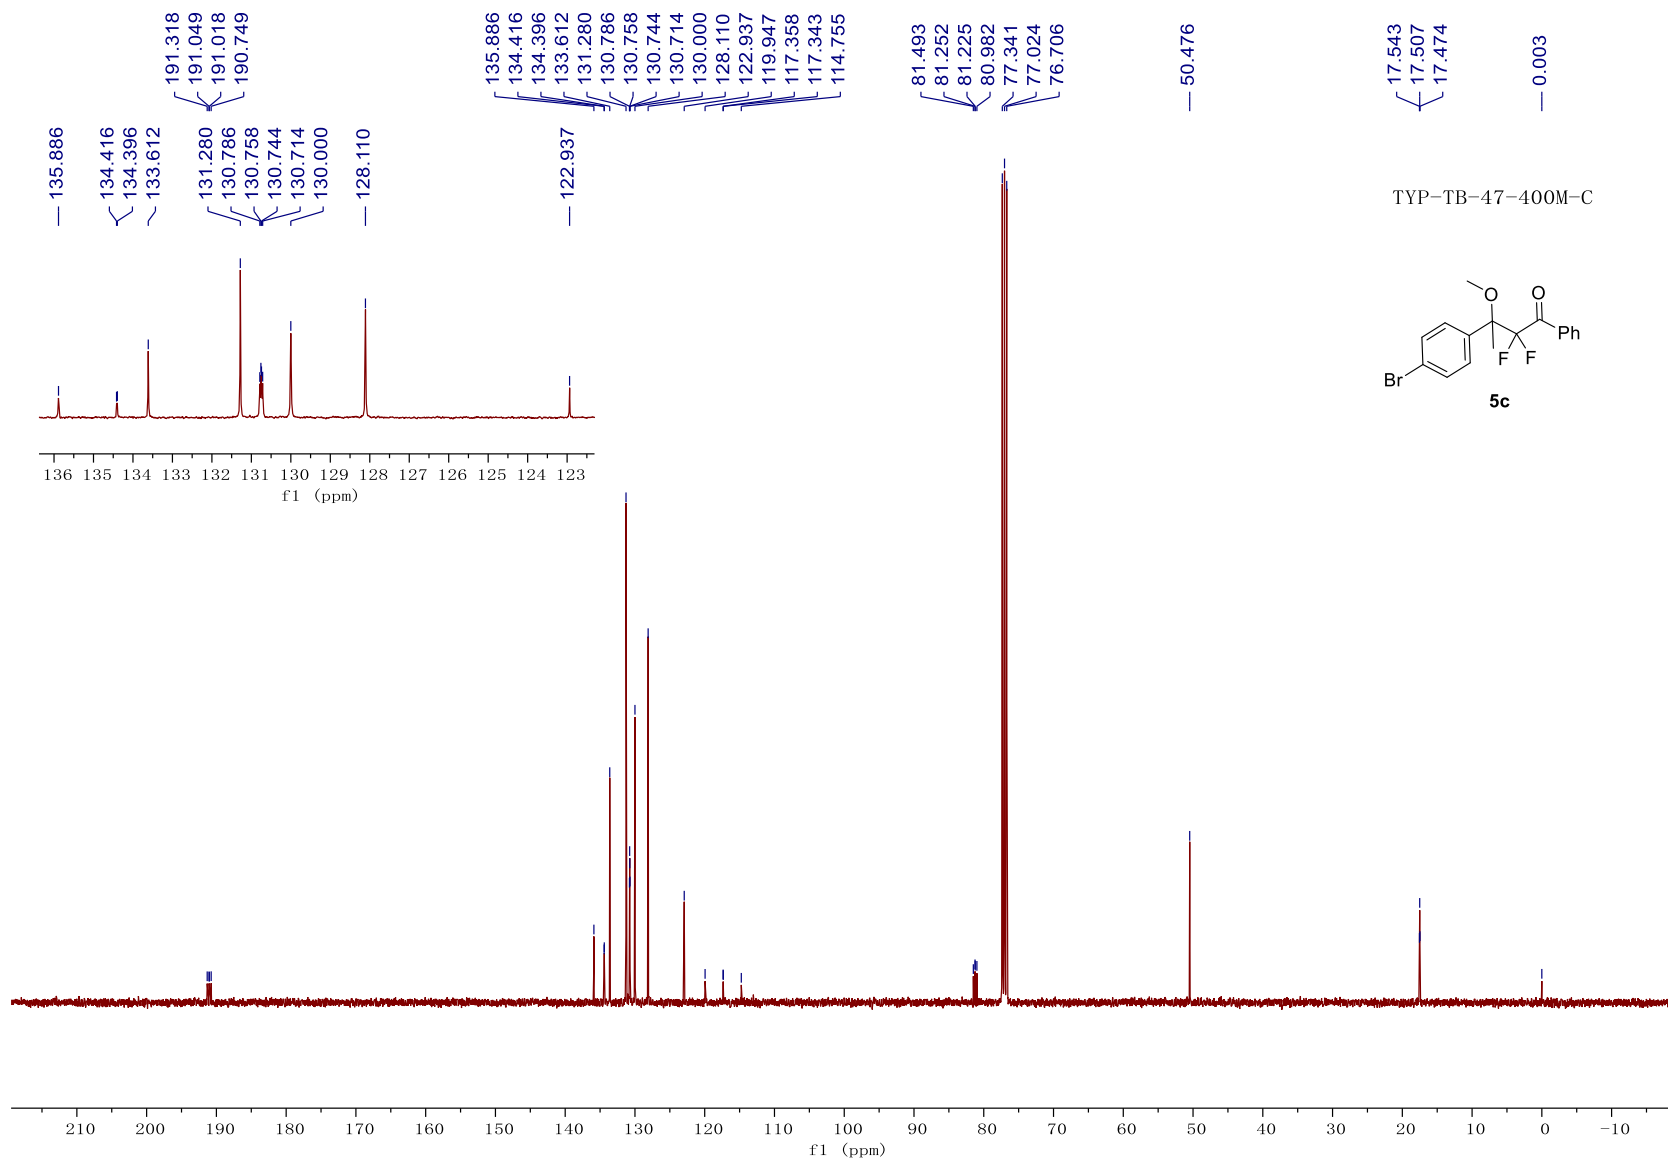

TYP-TB-47-300M-F

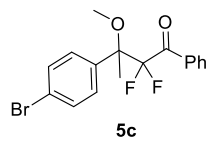

-107.416  
-108.315  
-108.971  
-109.871

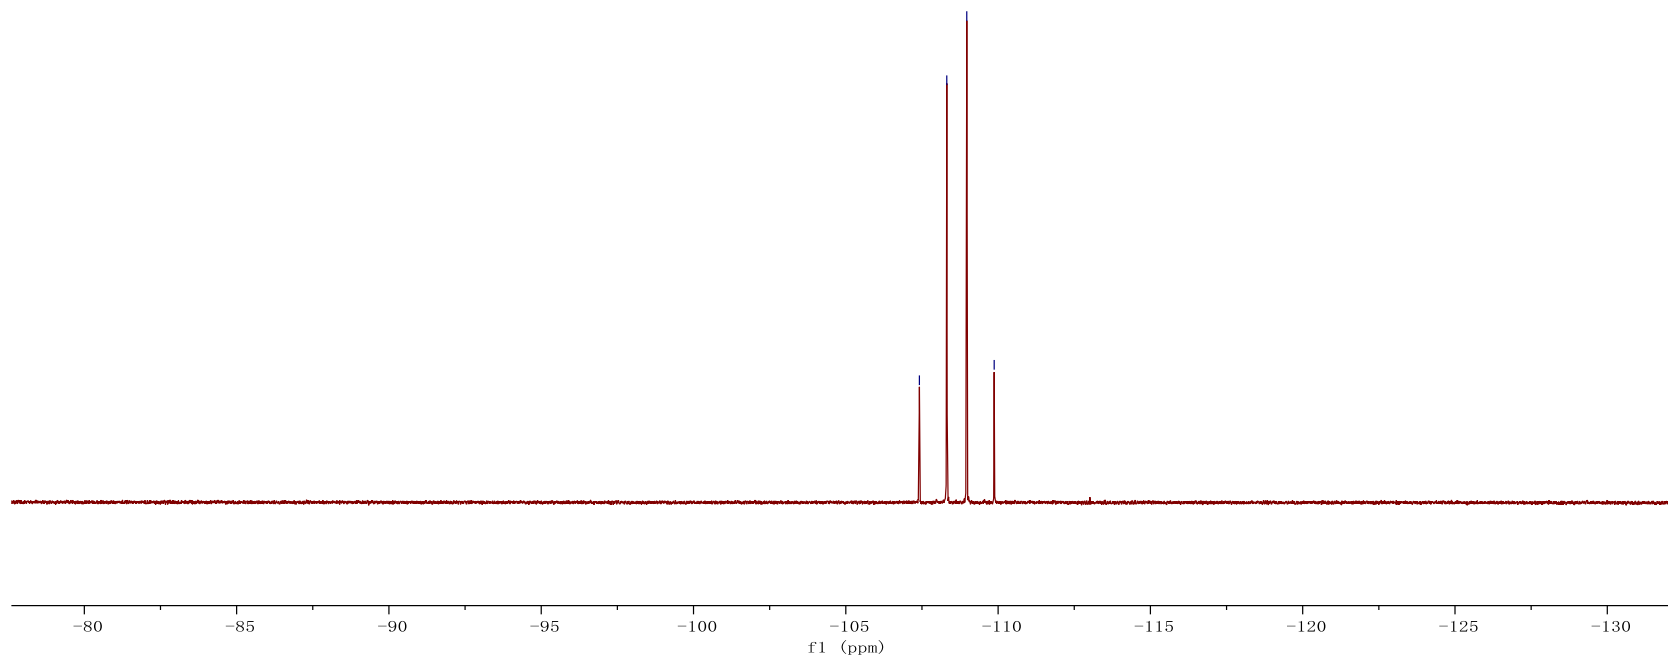

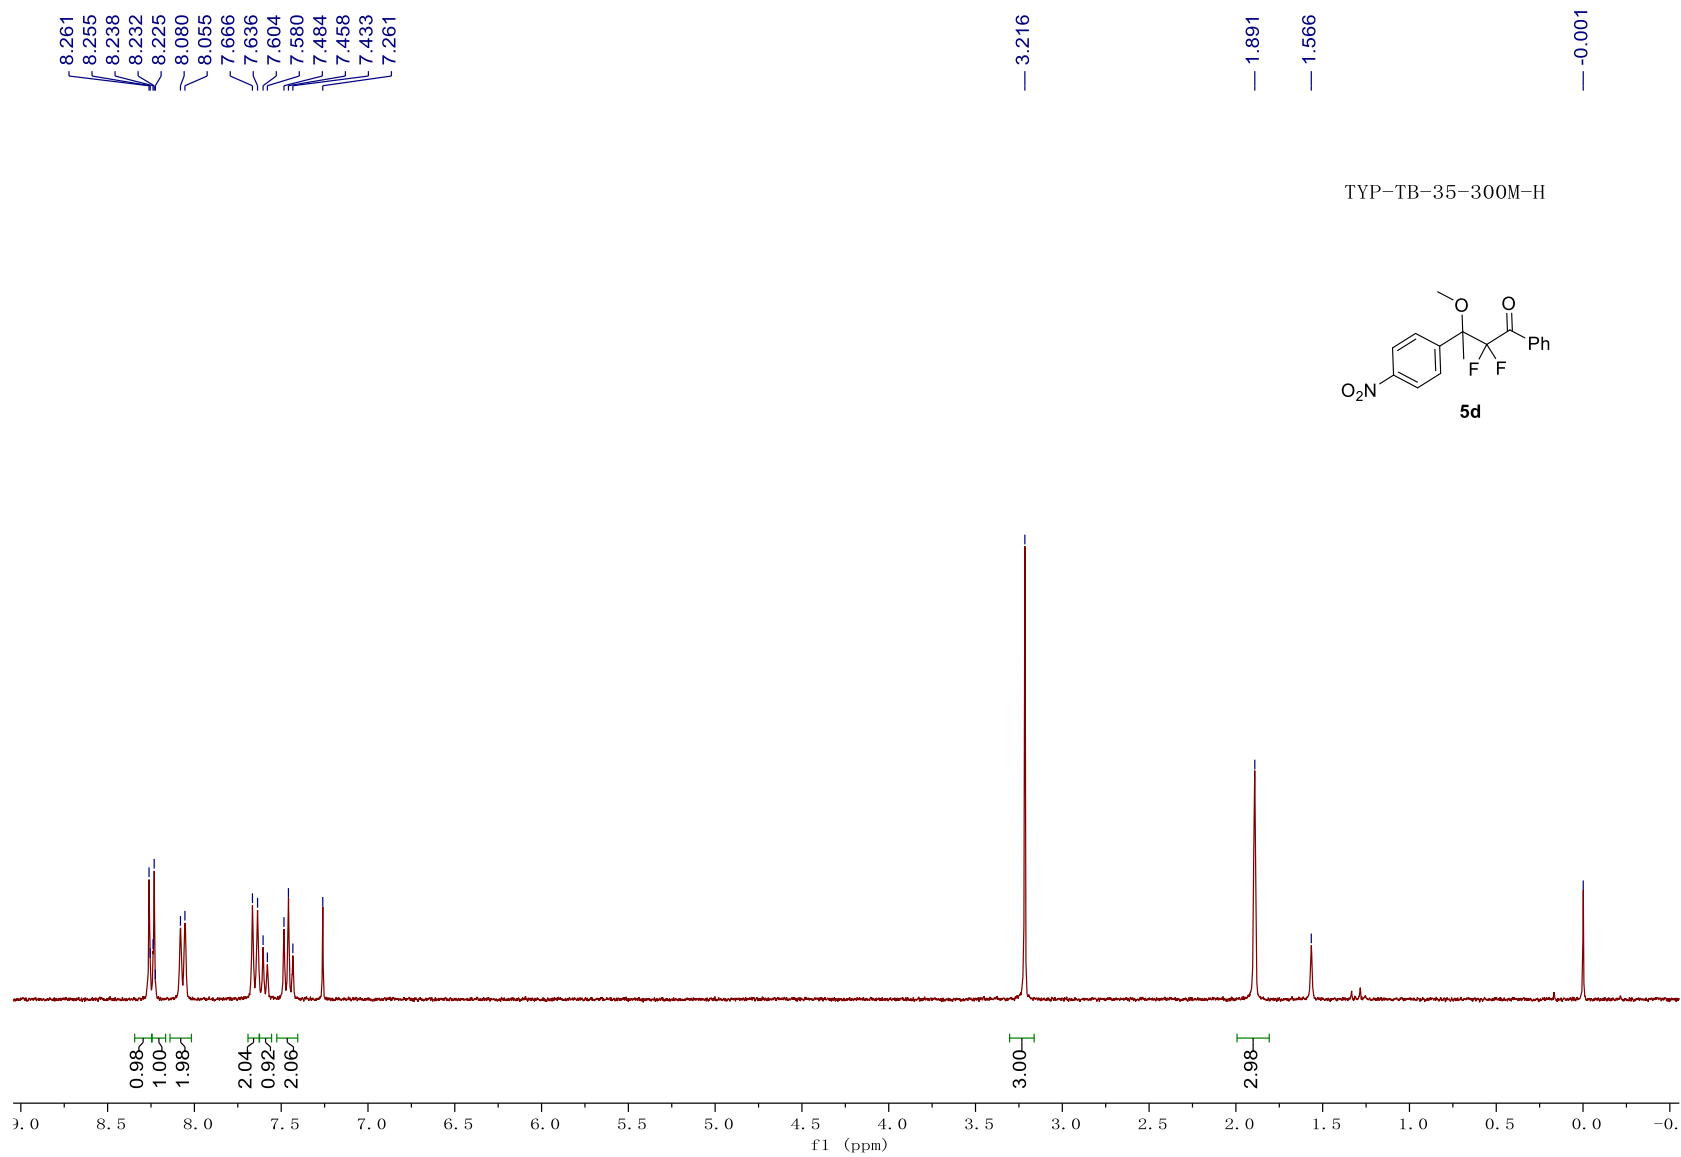



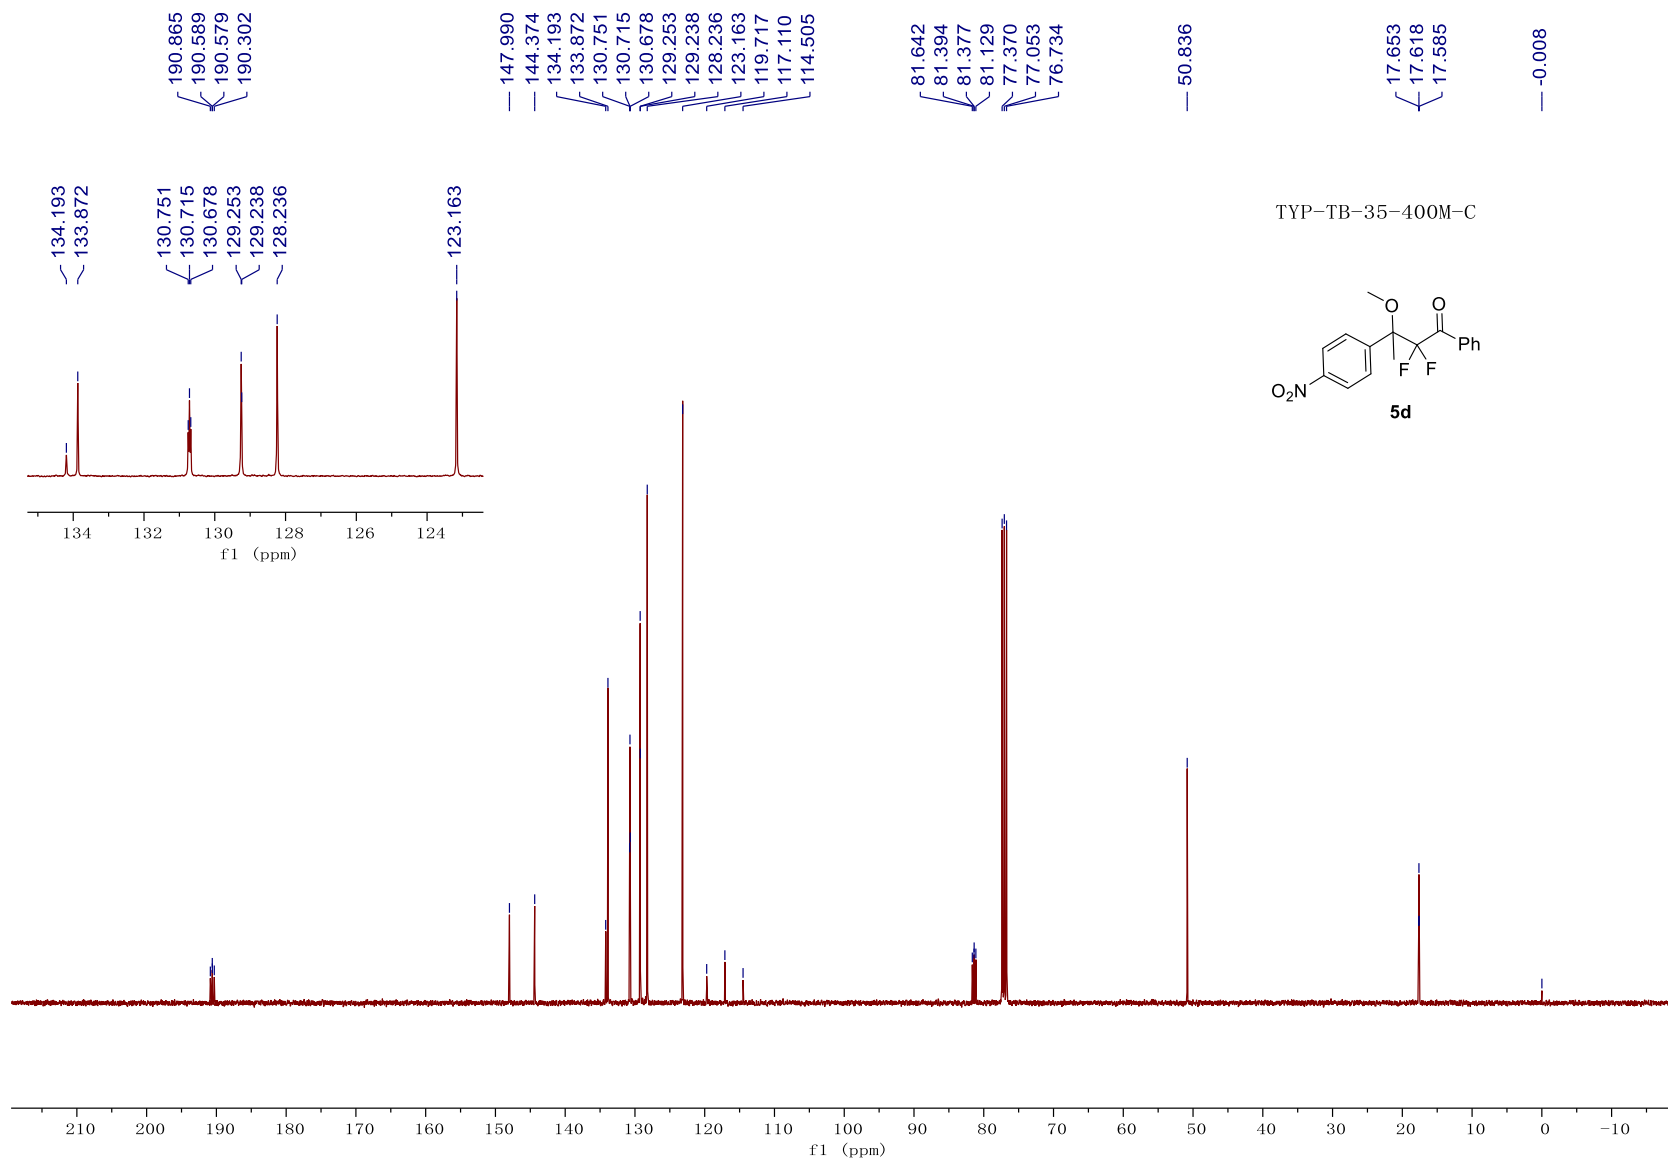

TYP-TB-35-300M-F

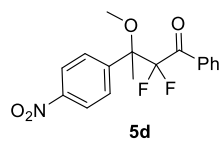

— -107.332

— -108.238

— -108.423

— -109.329

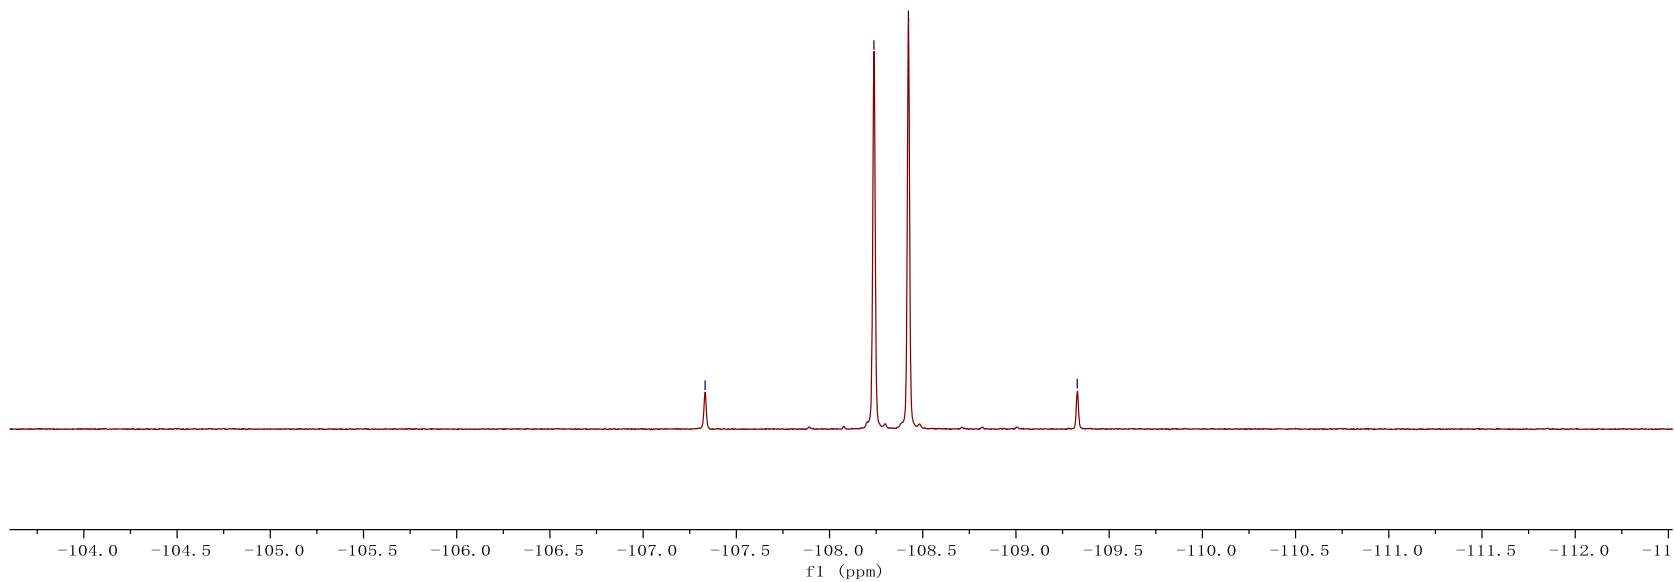

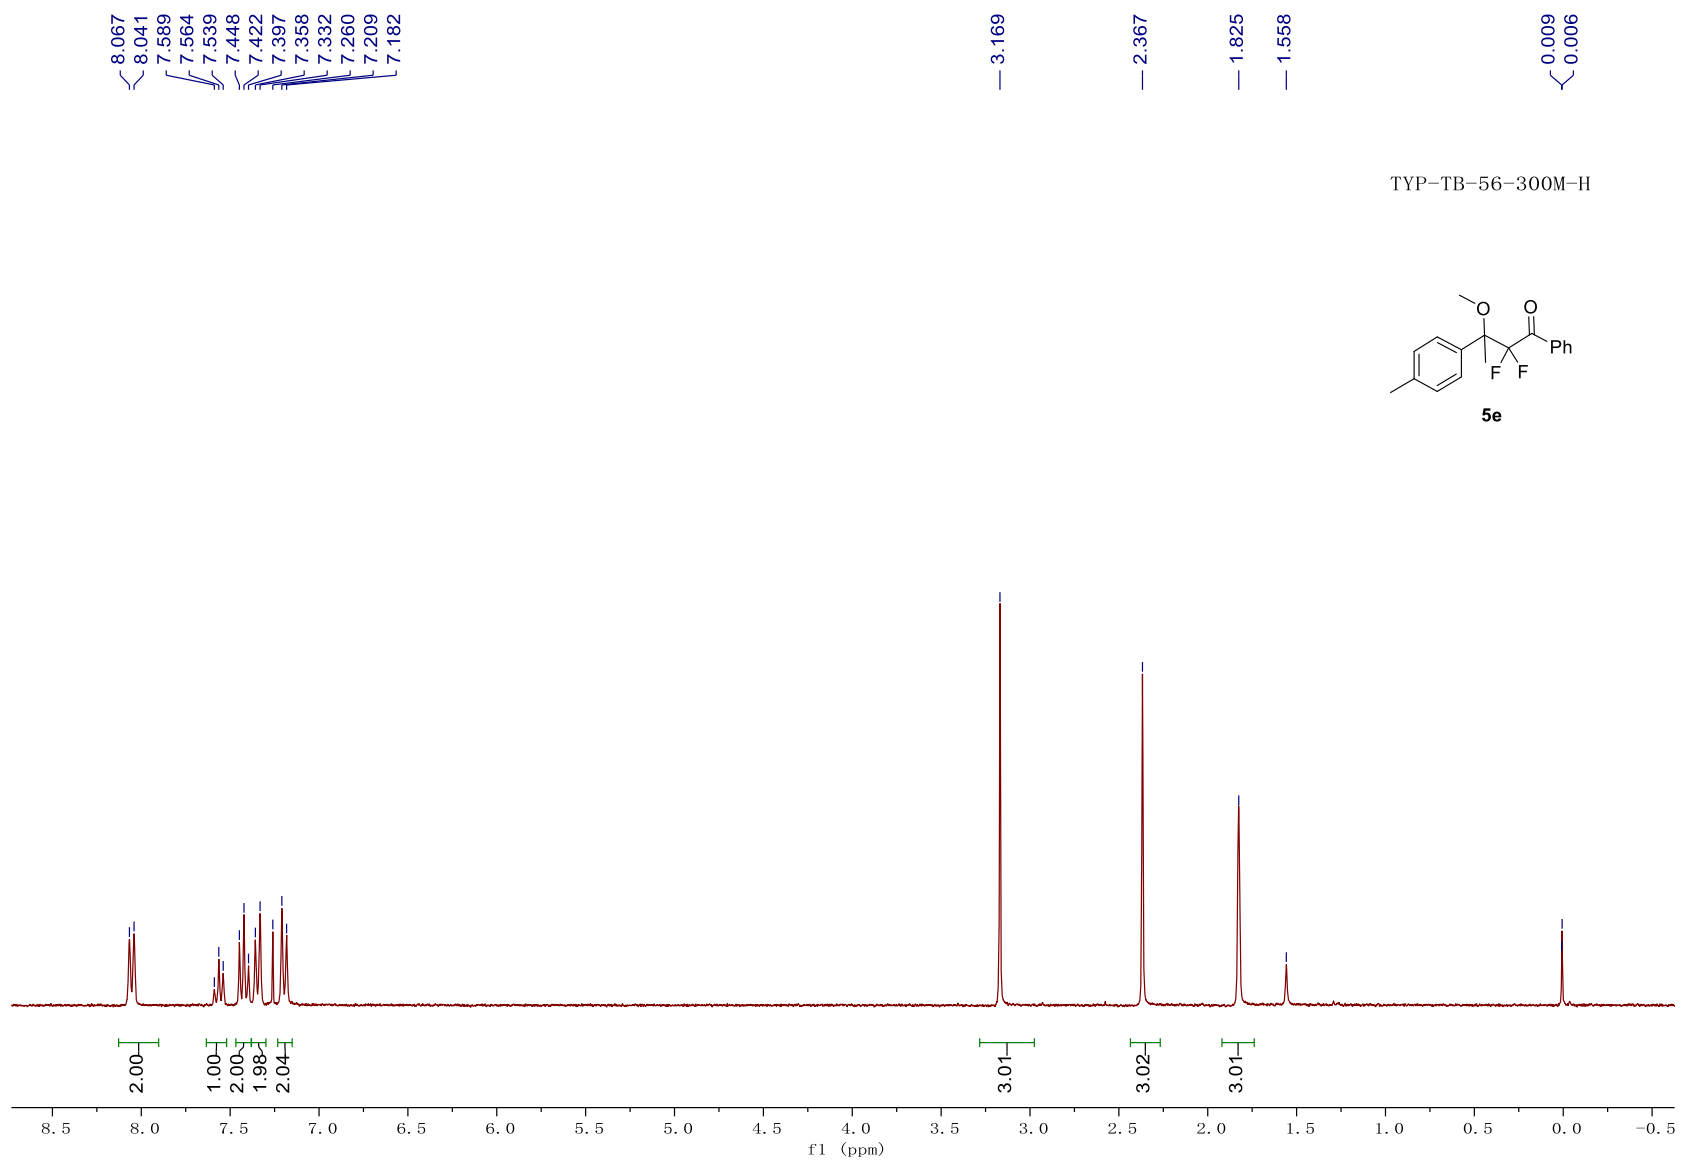

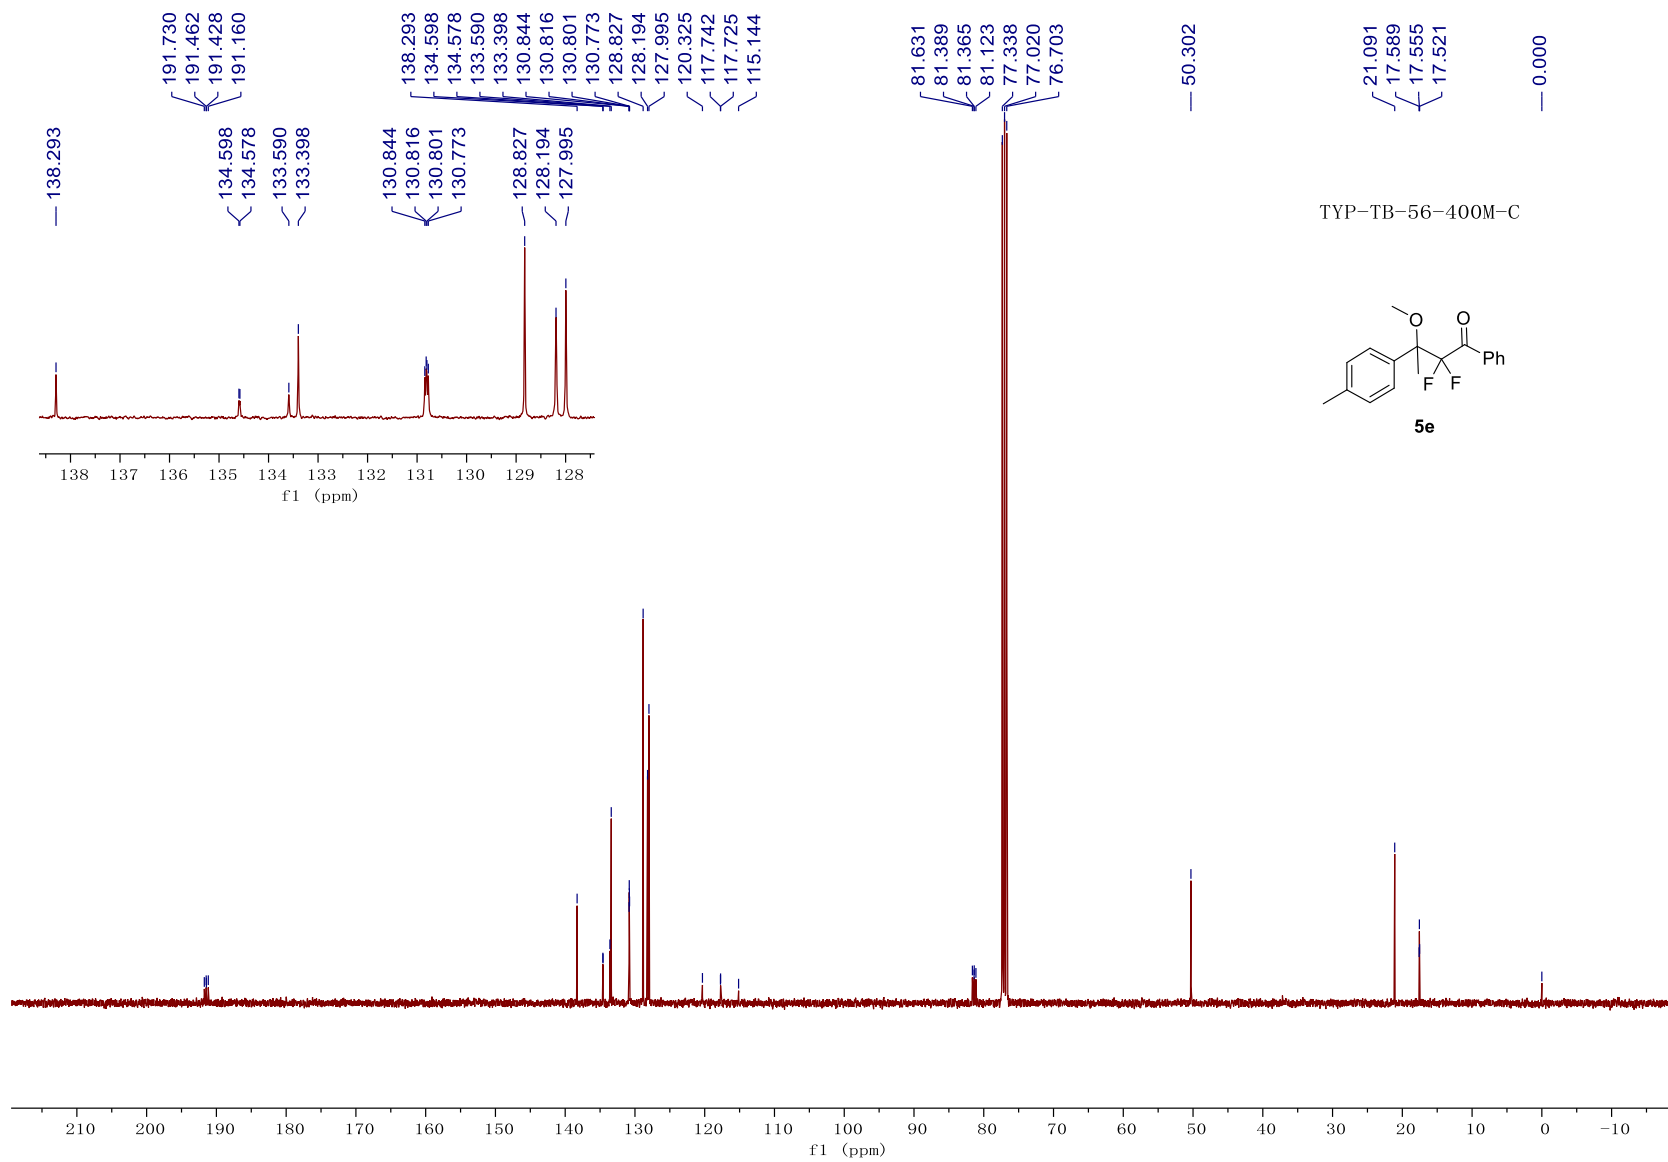

TYP-TB-56-300M-F

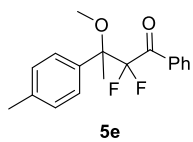

-107.462  
-108.356  
-109.014  
-109.907

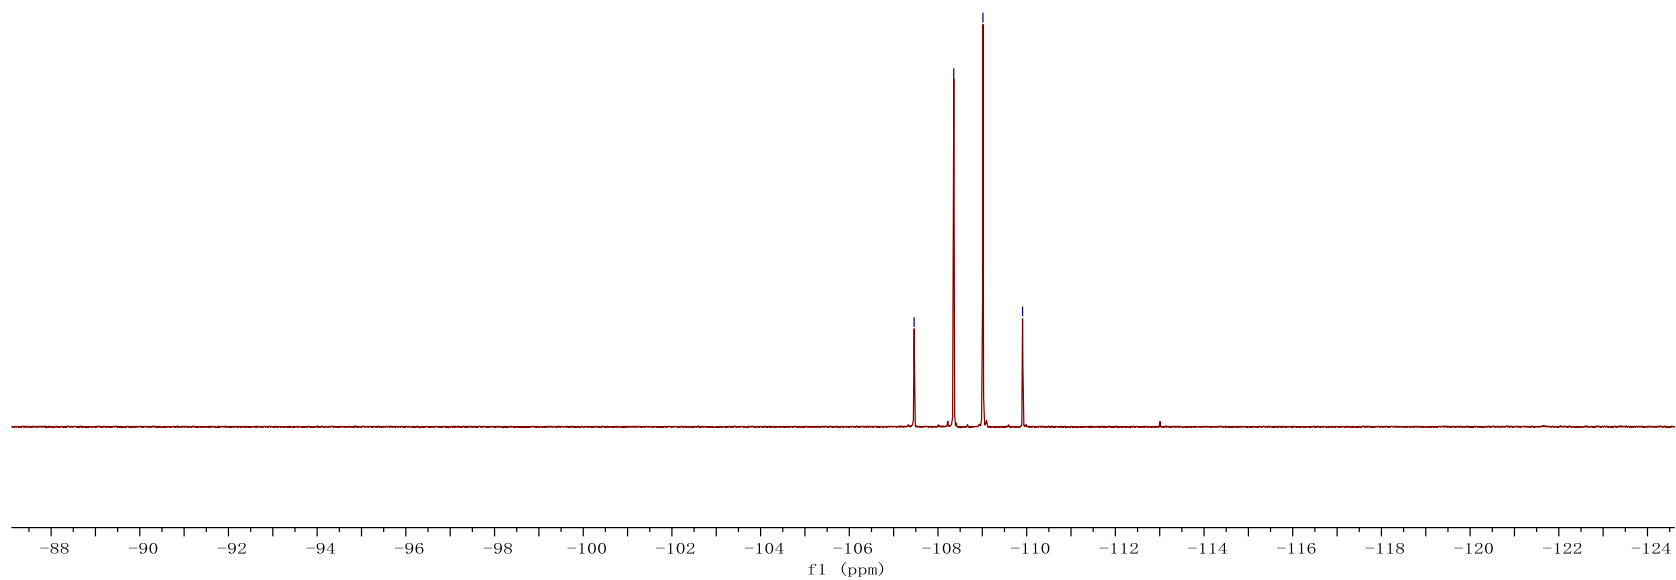

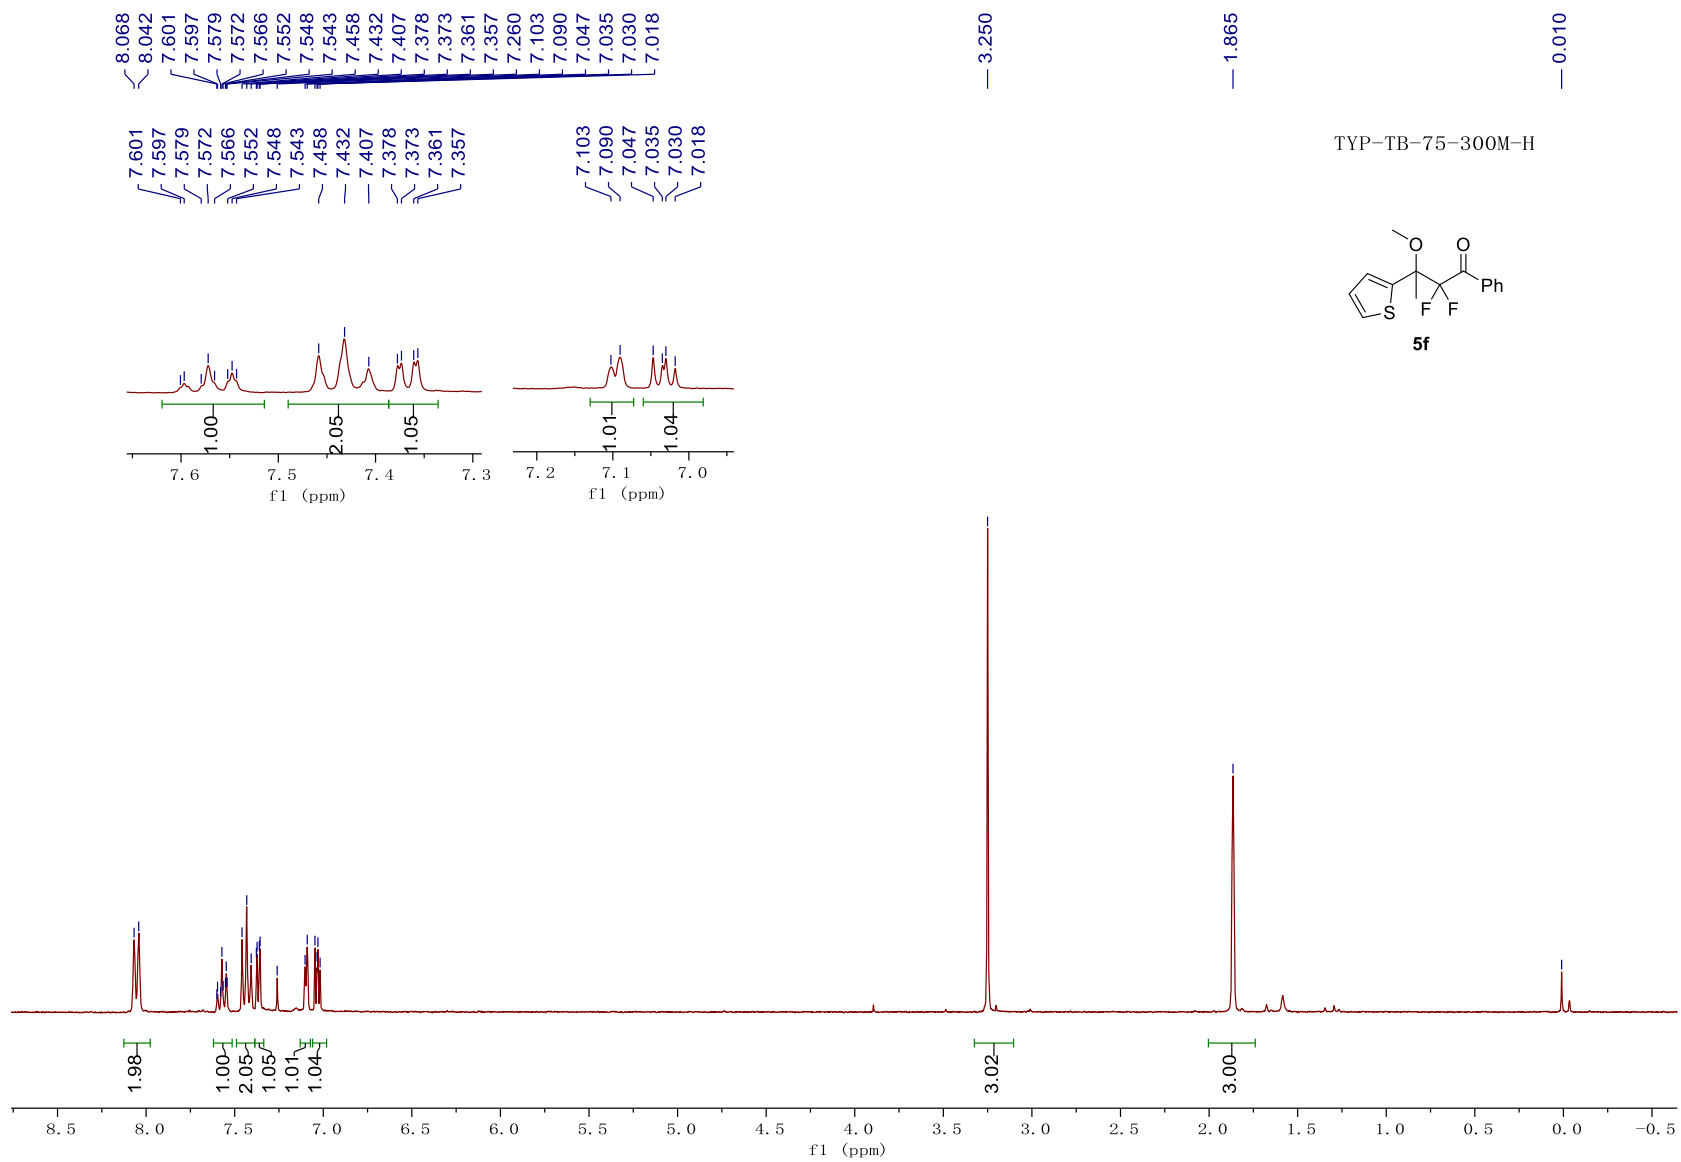

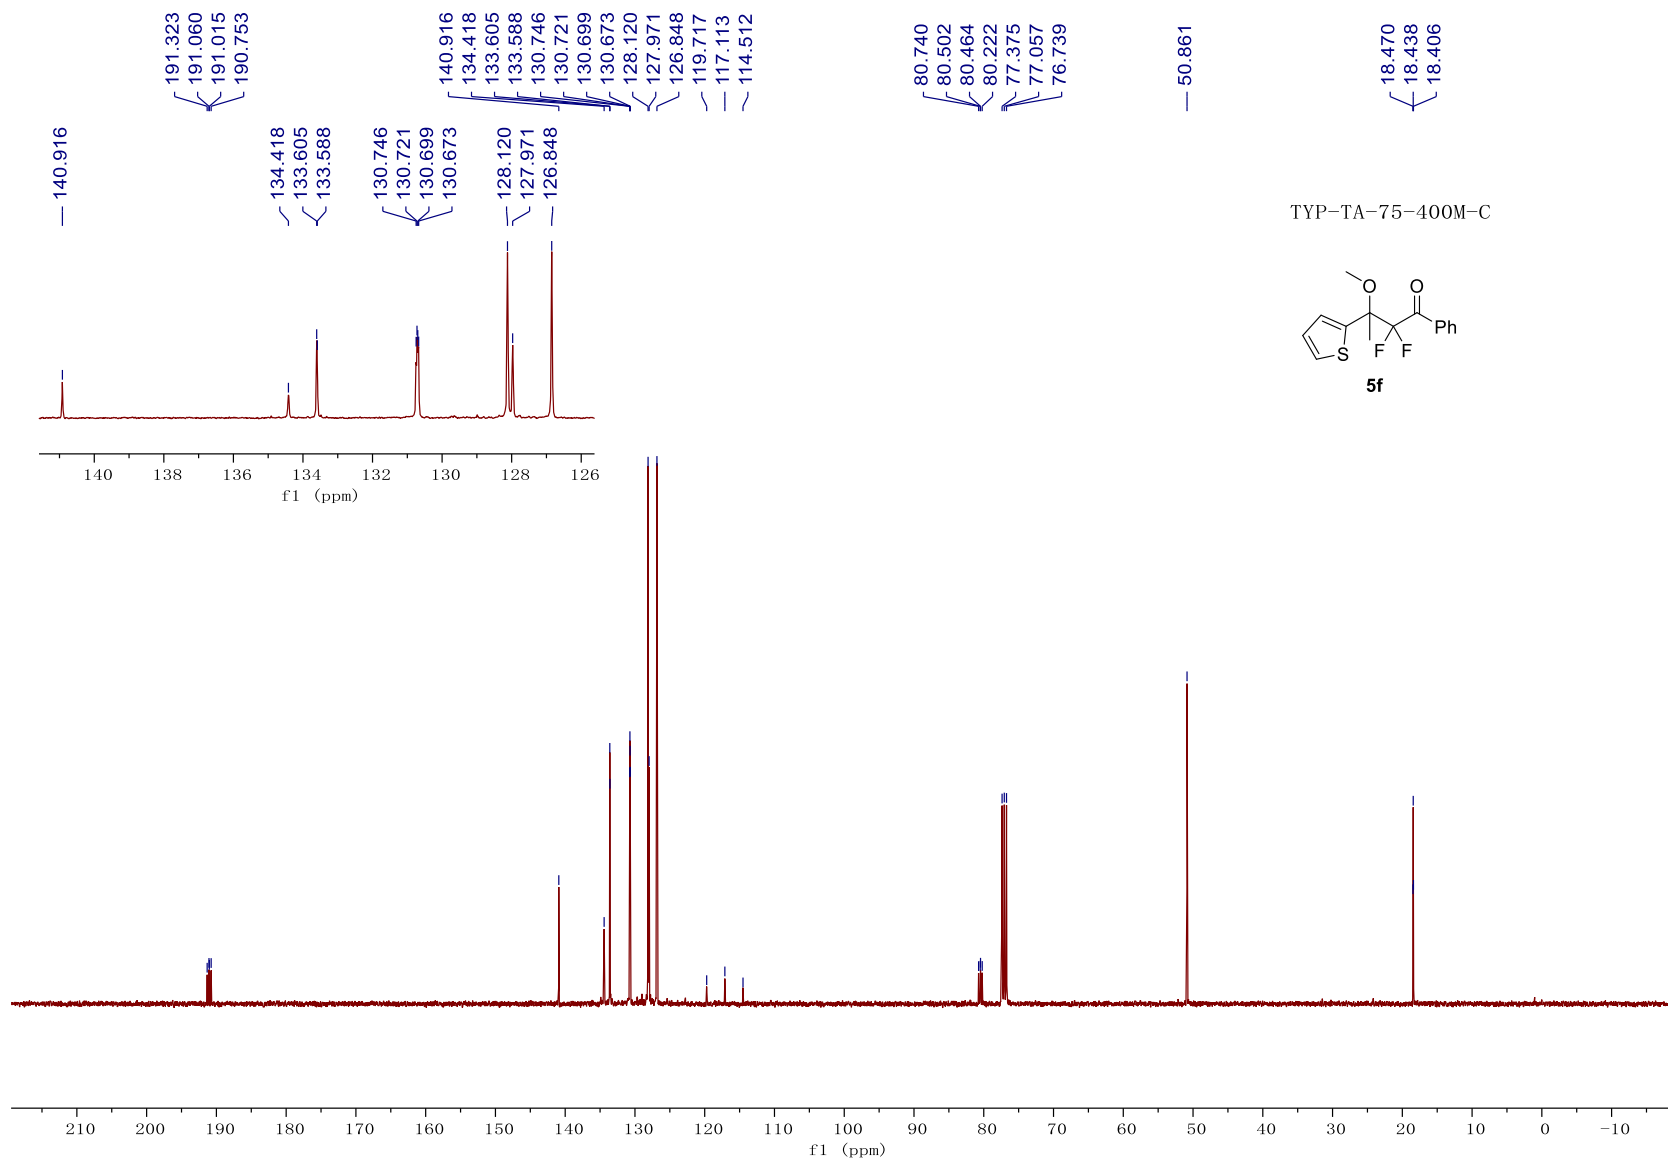

TYP-TB-75-300M-F

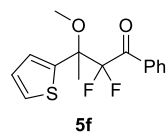

-106.847  
-107.741  
-108.759  
-109.654

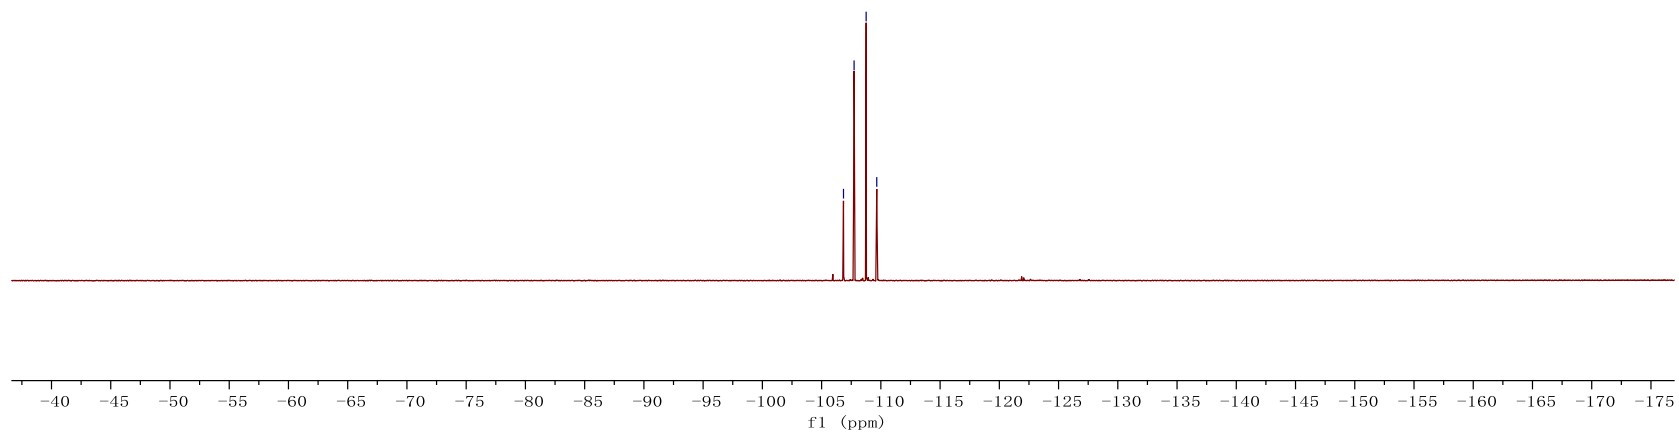



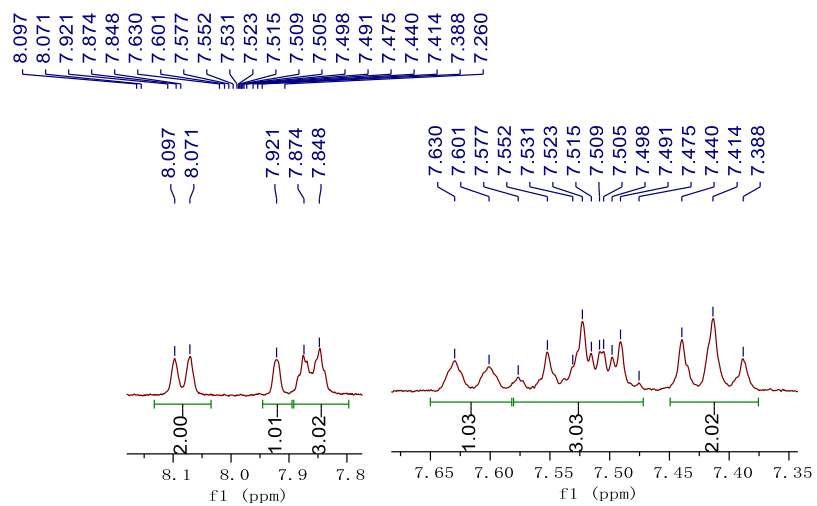

— 3.231

— 1.960

— 1.553

— 0.009

TYP-TB-62-300M-H

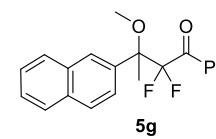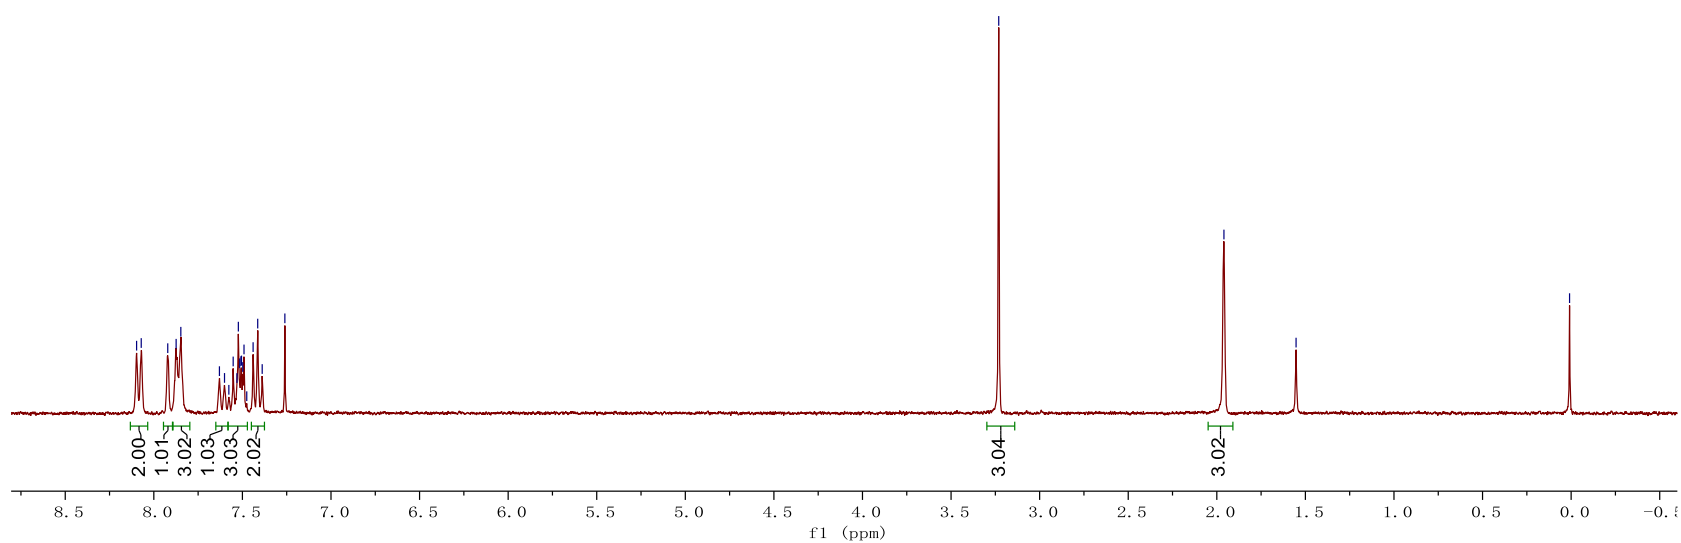

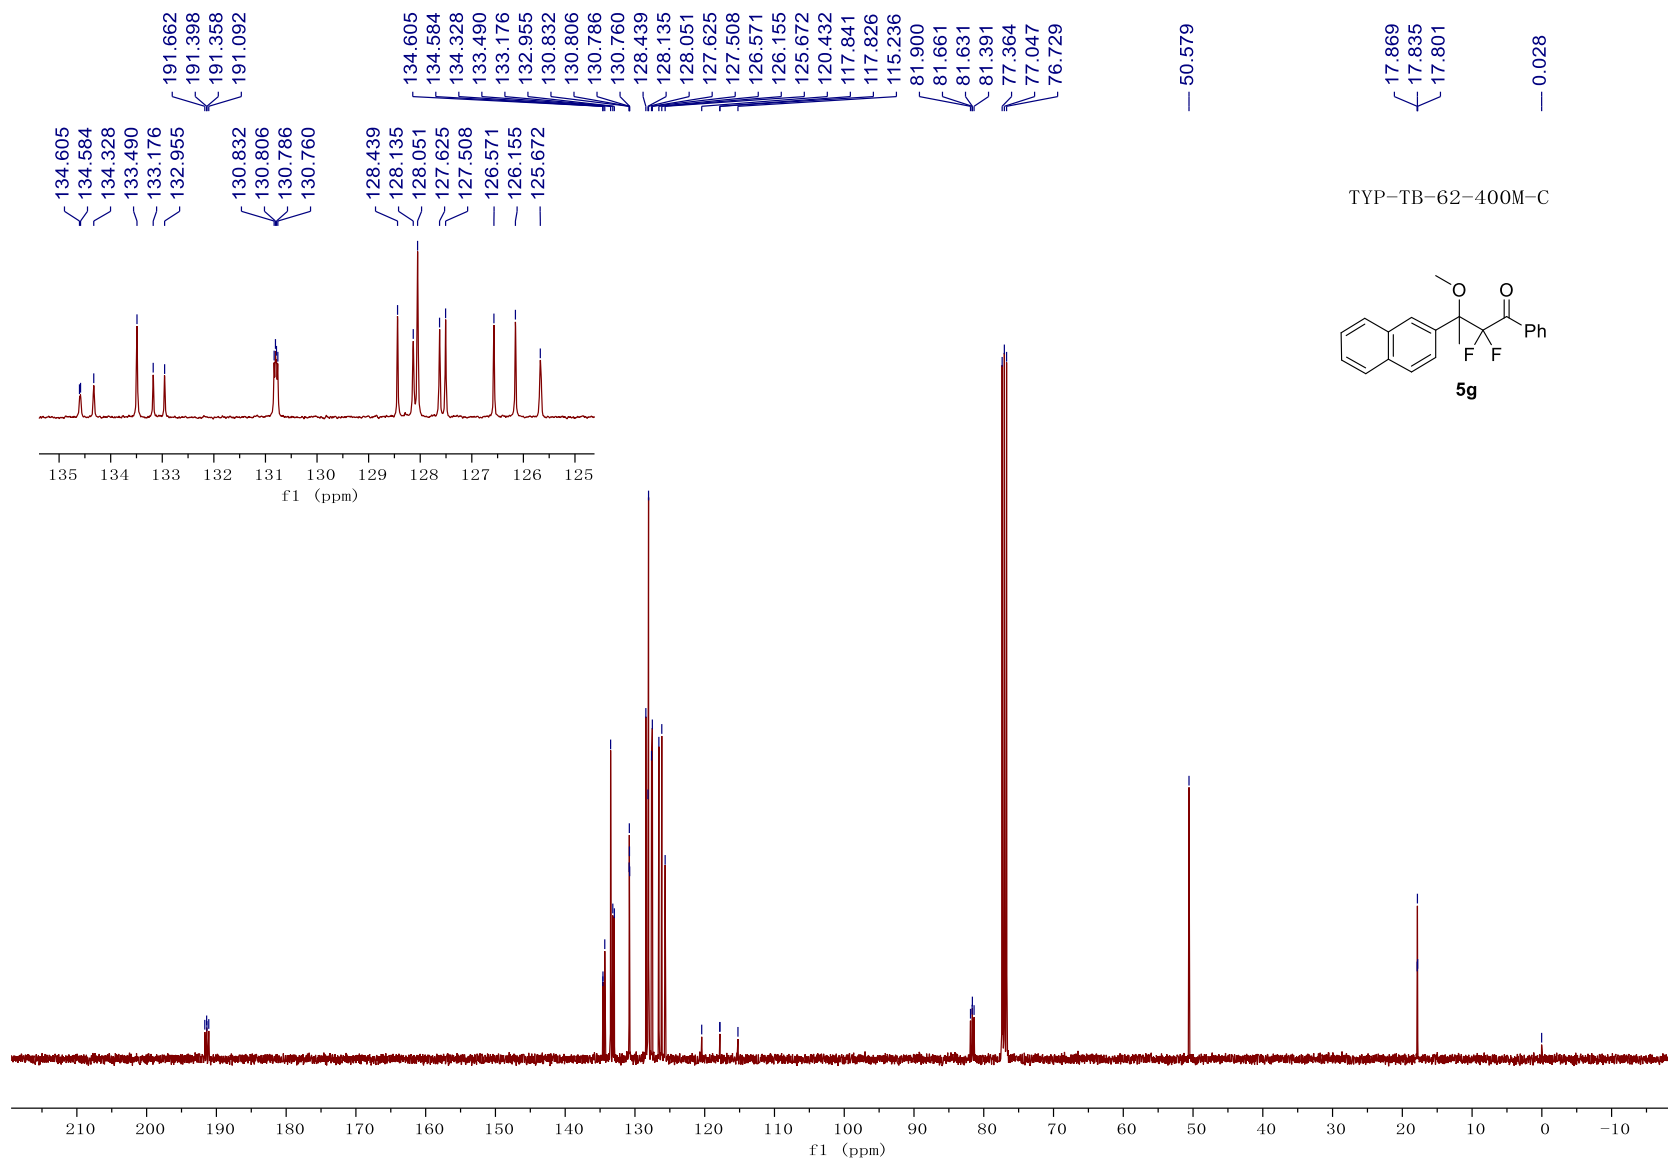

TYP-TB-62-300M-F

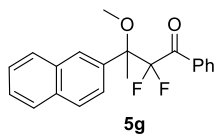

-106.863  
-107.761  
-108.825  
-109.724

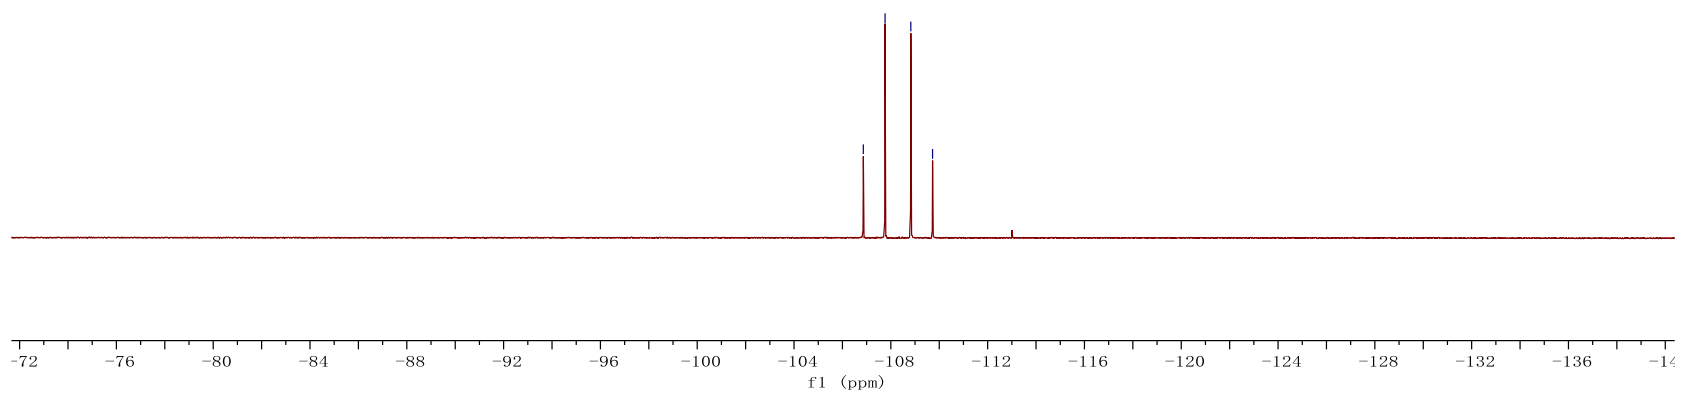

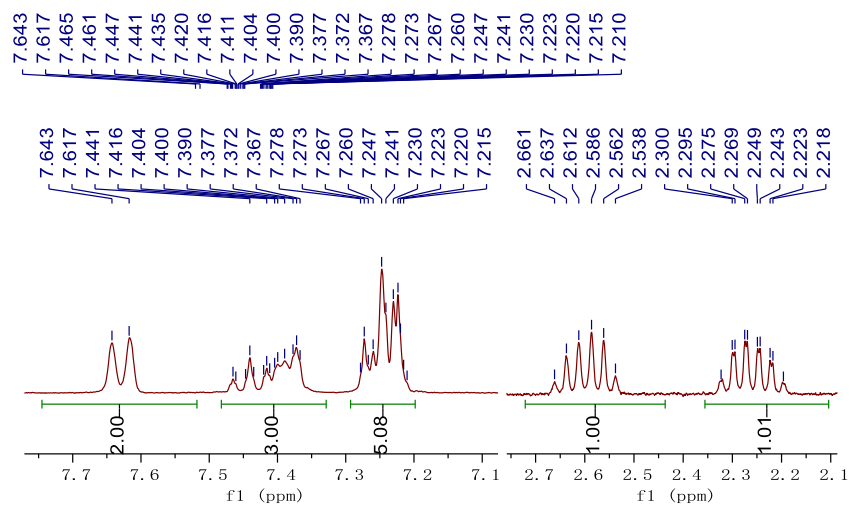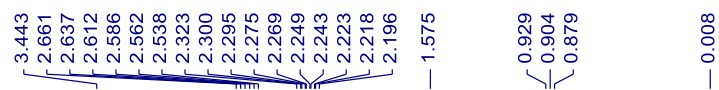

TYP-TA-141-300M-H

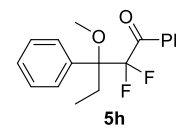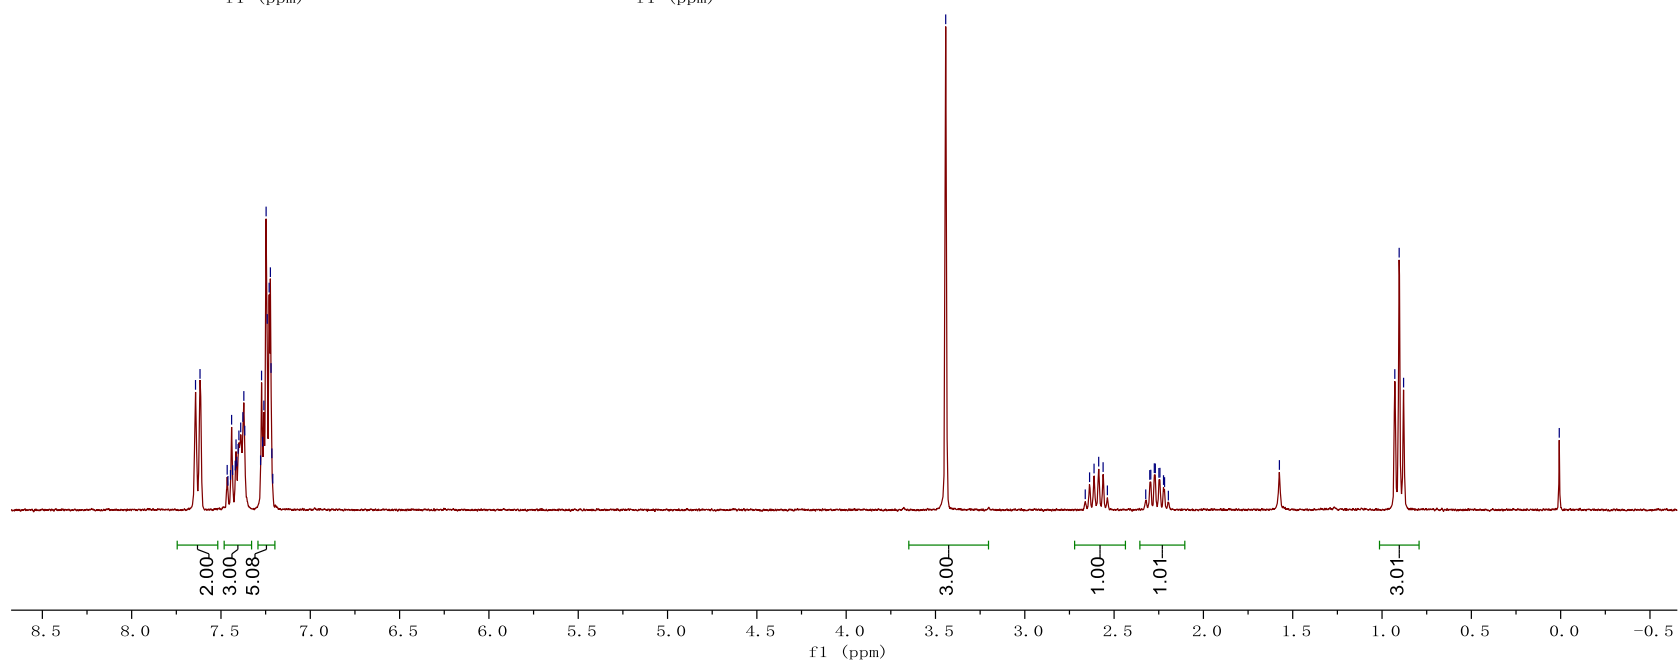

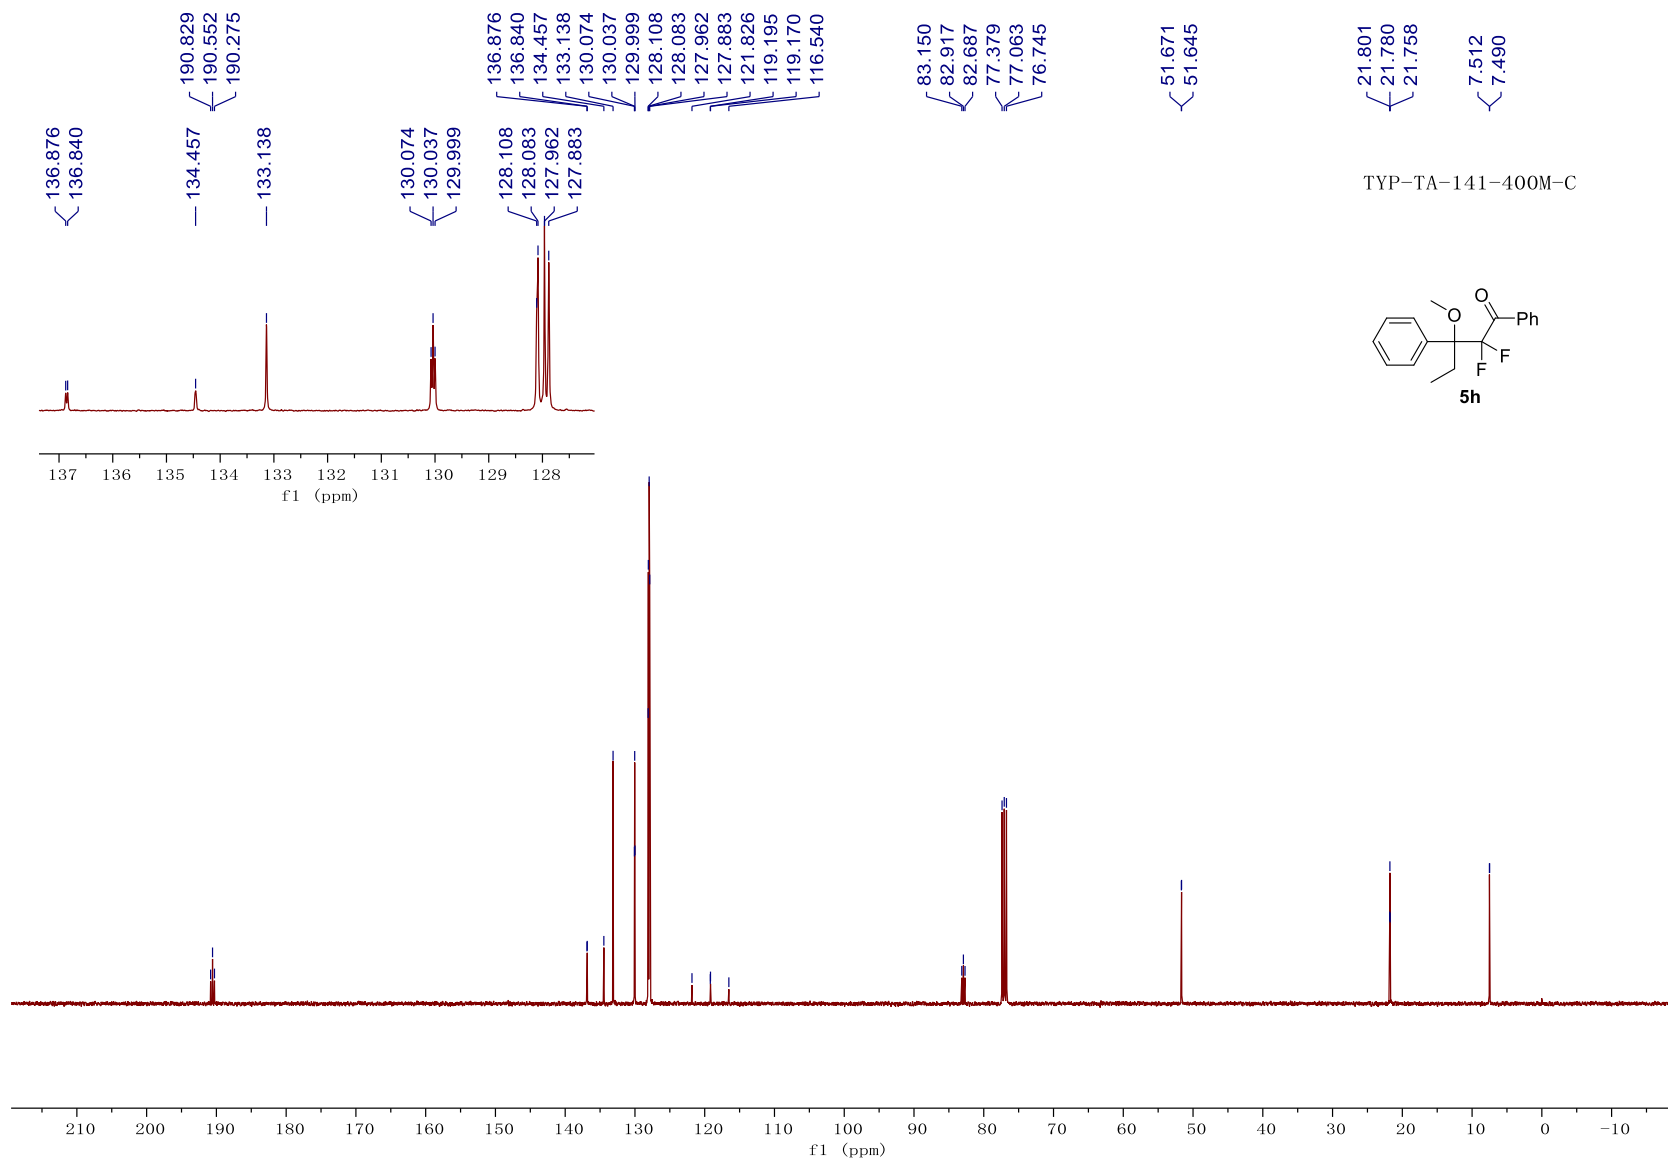

TYP-TA-141-300M-F

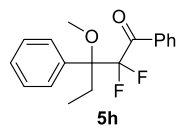

-103.053  
-103.955  
-106.706  
-107.608

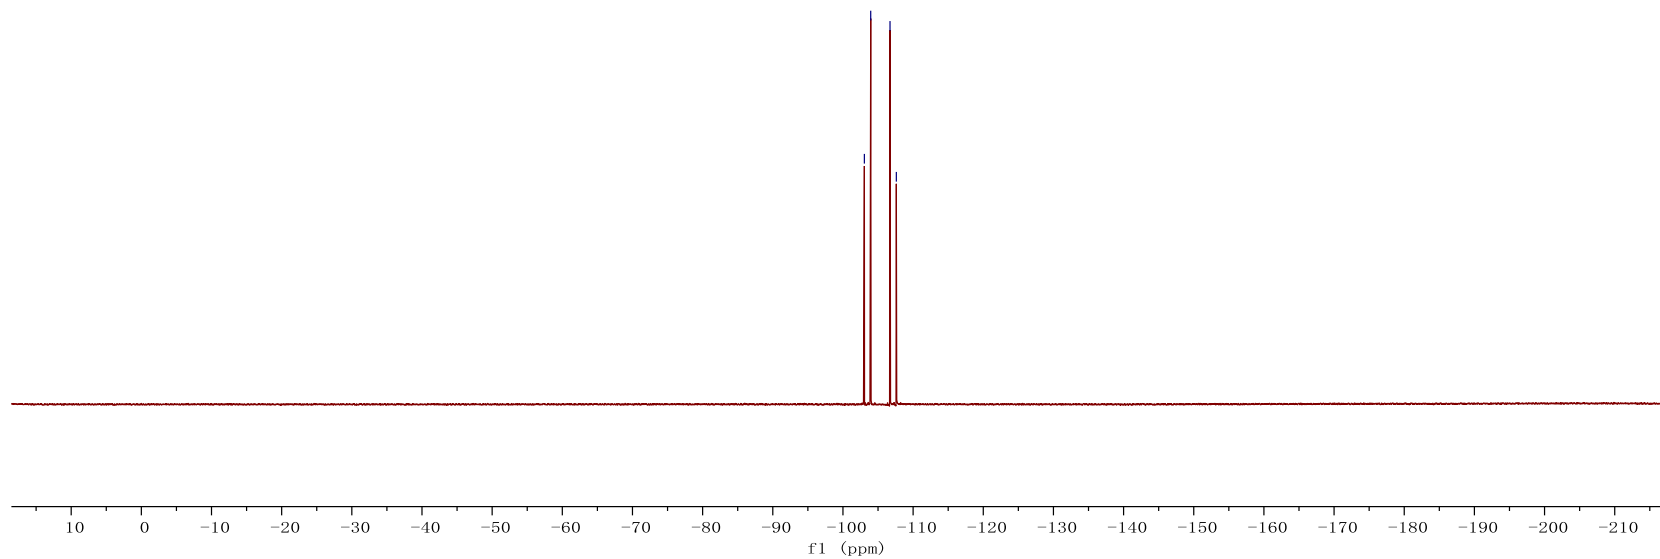

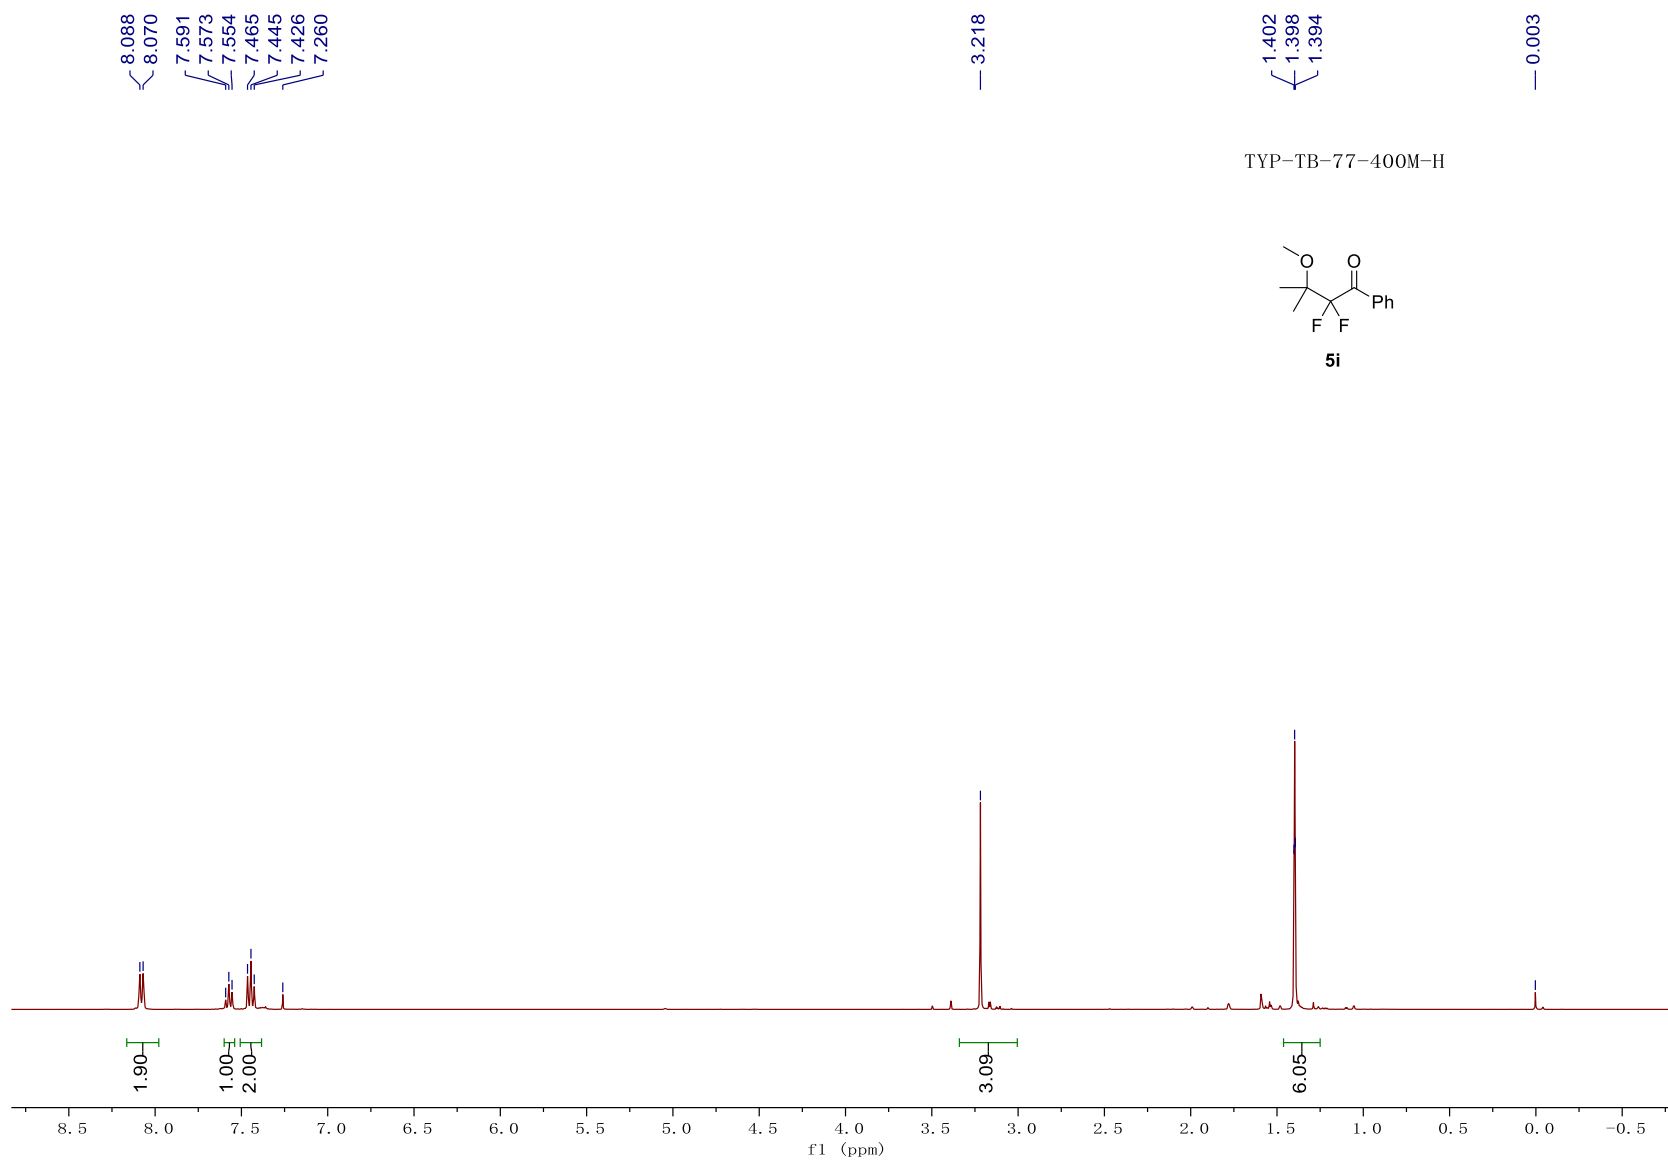

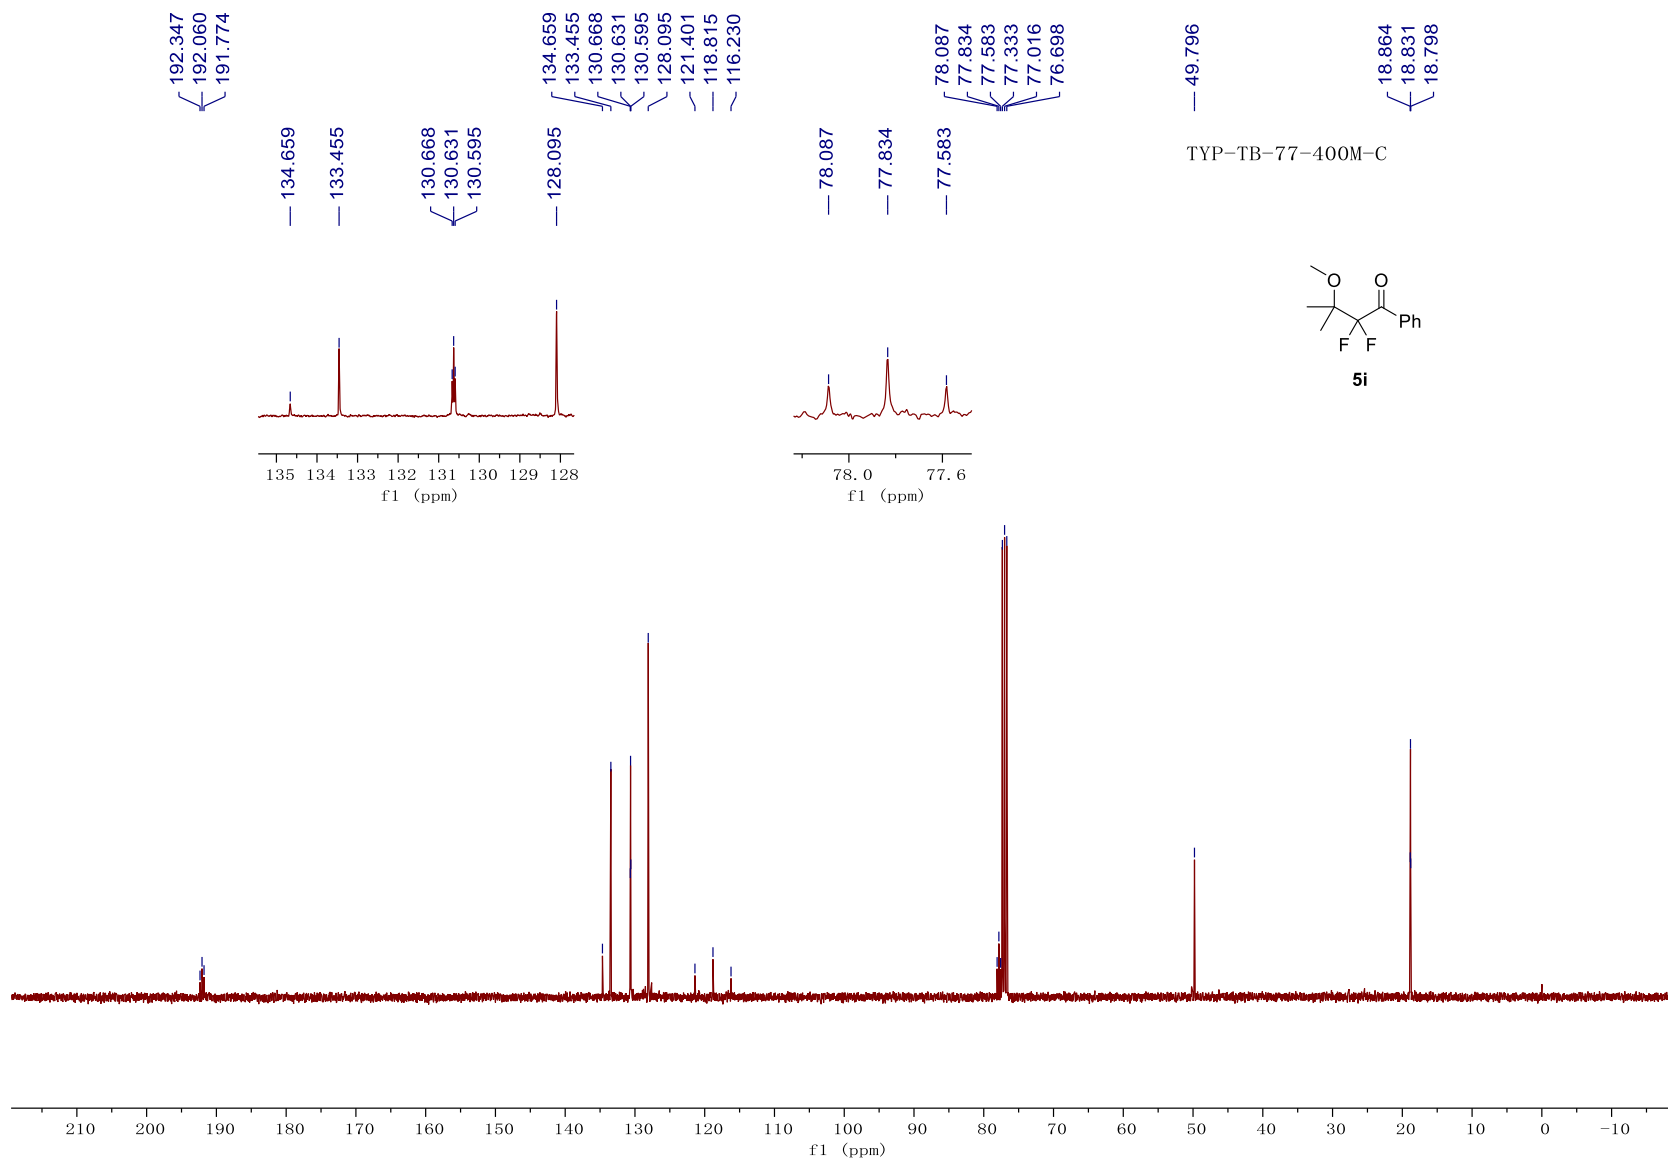



TYP-TB-77-400M-F

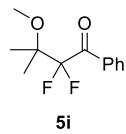

-110.807

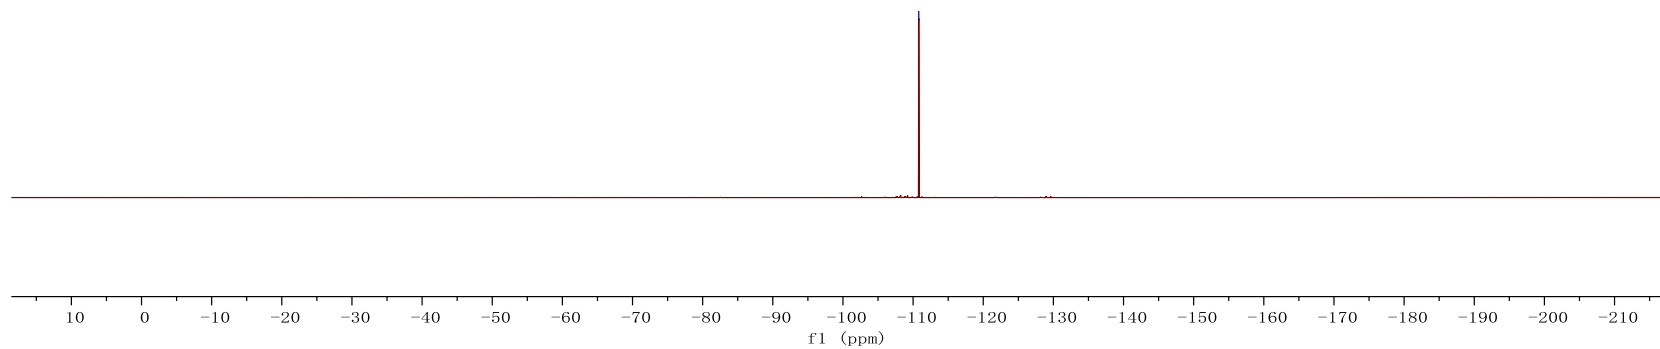

8.101  
8.075  
7.618  
7.594  
7.569  
7.490  
7.464  
7.439  
7.321  
7.296  
7.272  
7.260  
7.226  
7.201  
7.171

3.286  
2.819  
2.800  
2.780  
2.762  
2.746  
2.724  
2.707  
2.663  
2.119  
2.100  
2.078  
2.058  
2.038  
2.017  
1.994  
1.969  
1.550  
1.469

0.006  
0.003

TYP-TB-53-300M-H

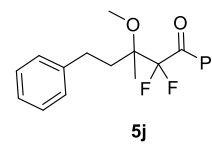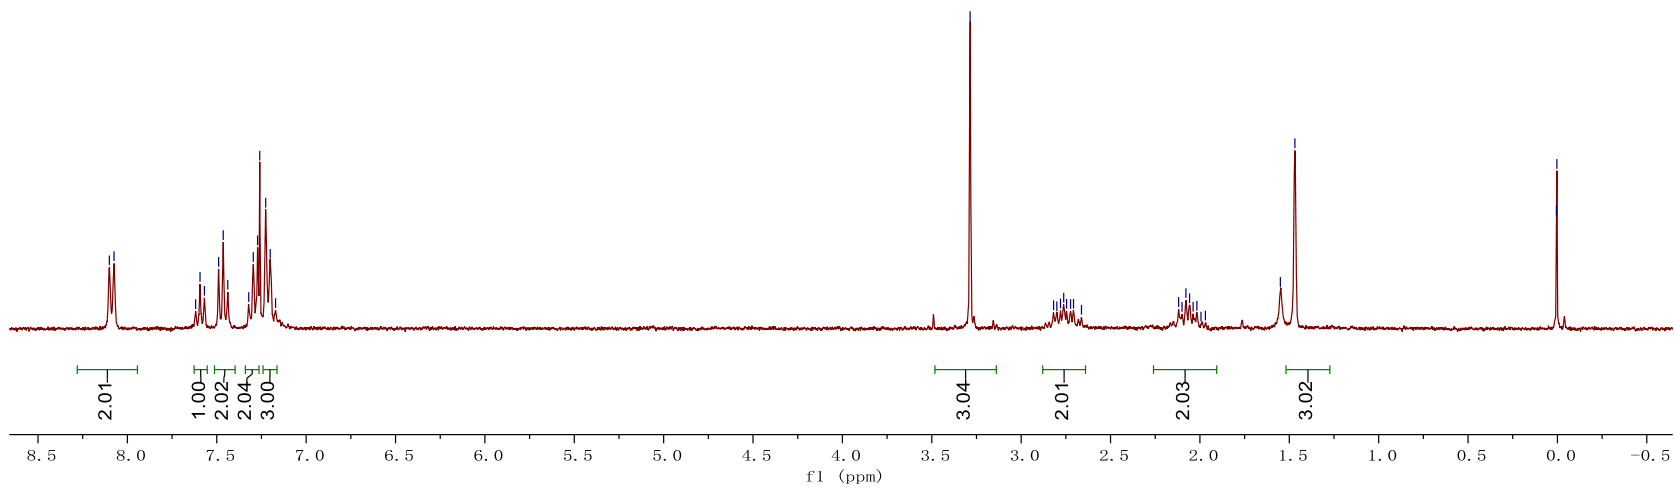

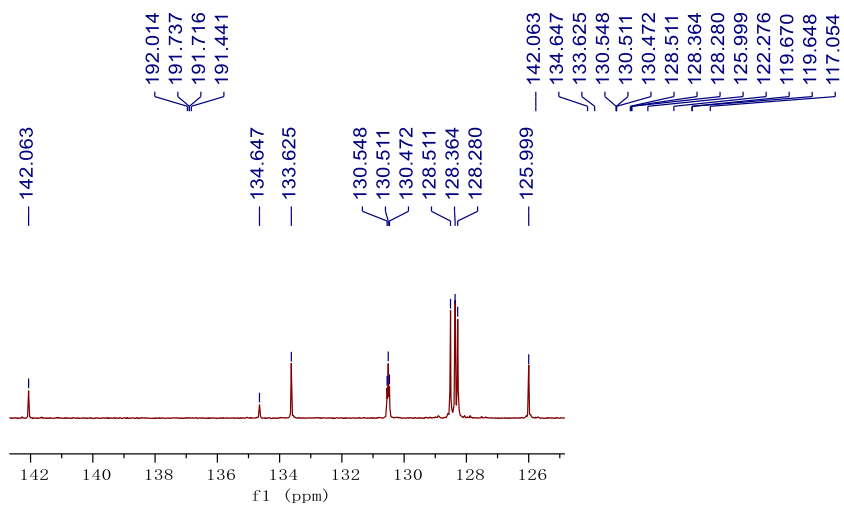

TYP-TB-53-400M-C

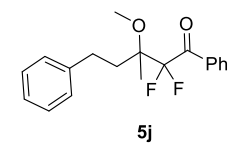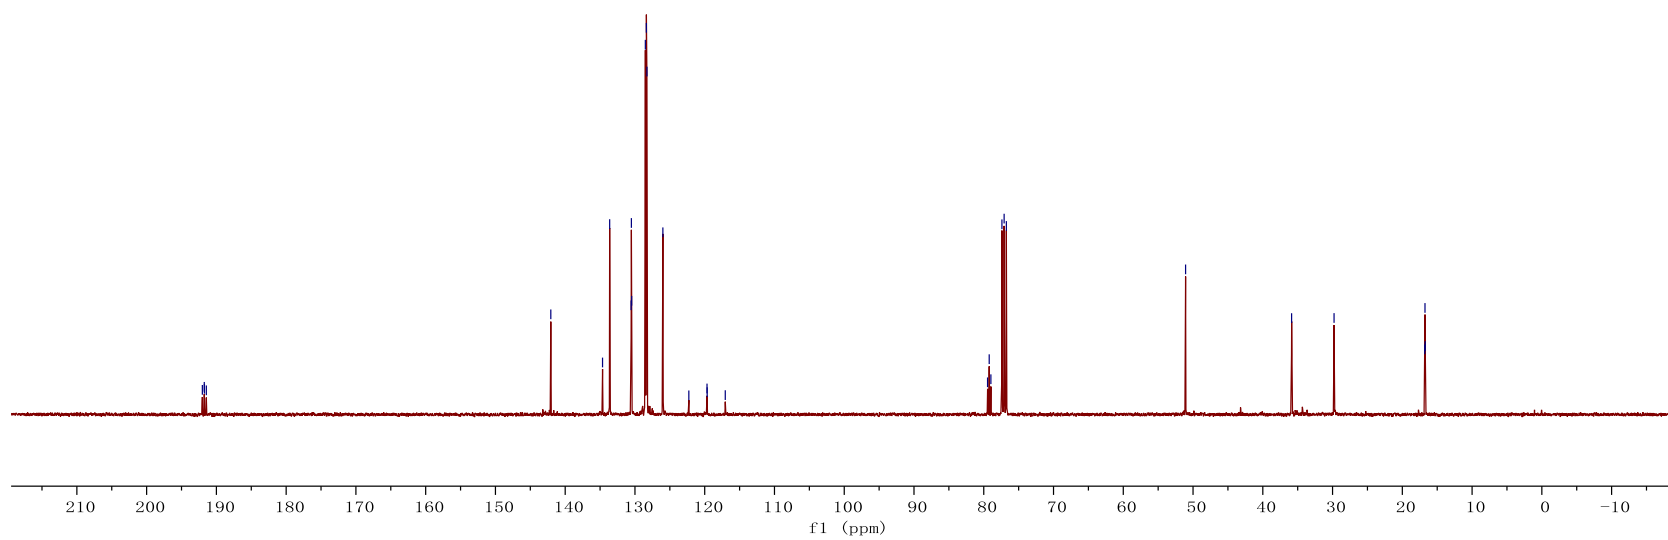

TYP-TB-53-300M-F

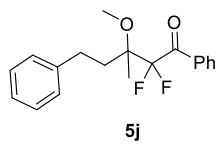

-106.199  
-107.121  
-109.075  
-109.996

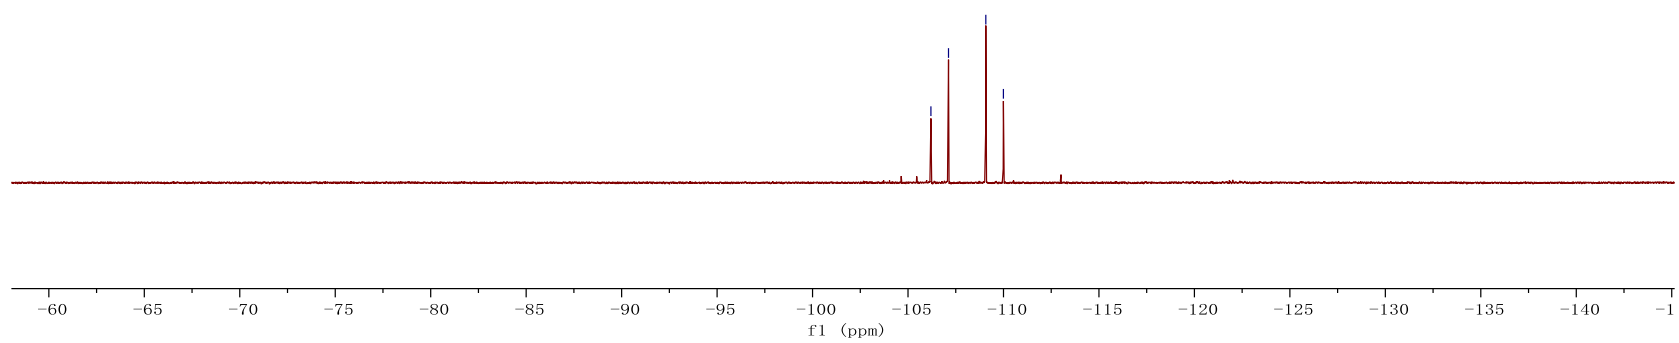

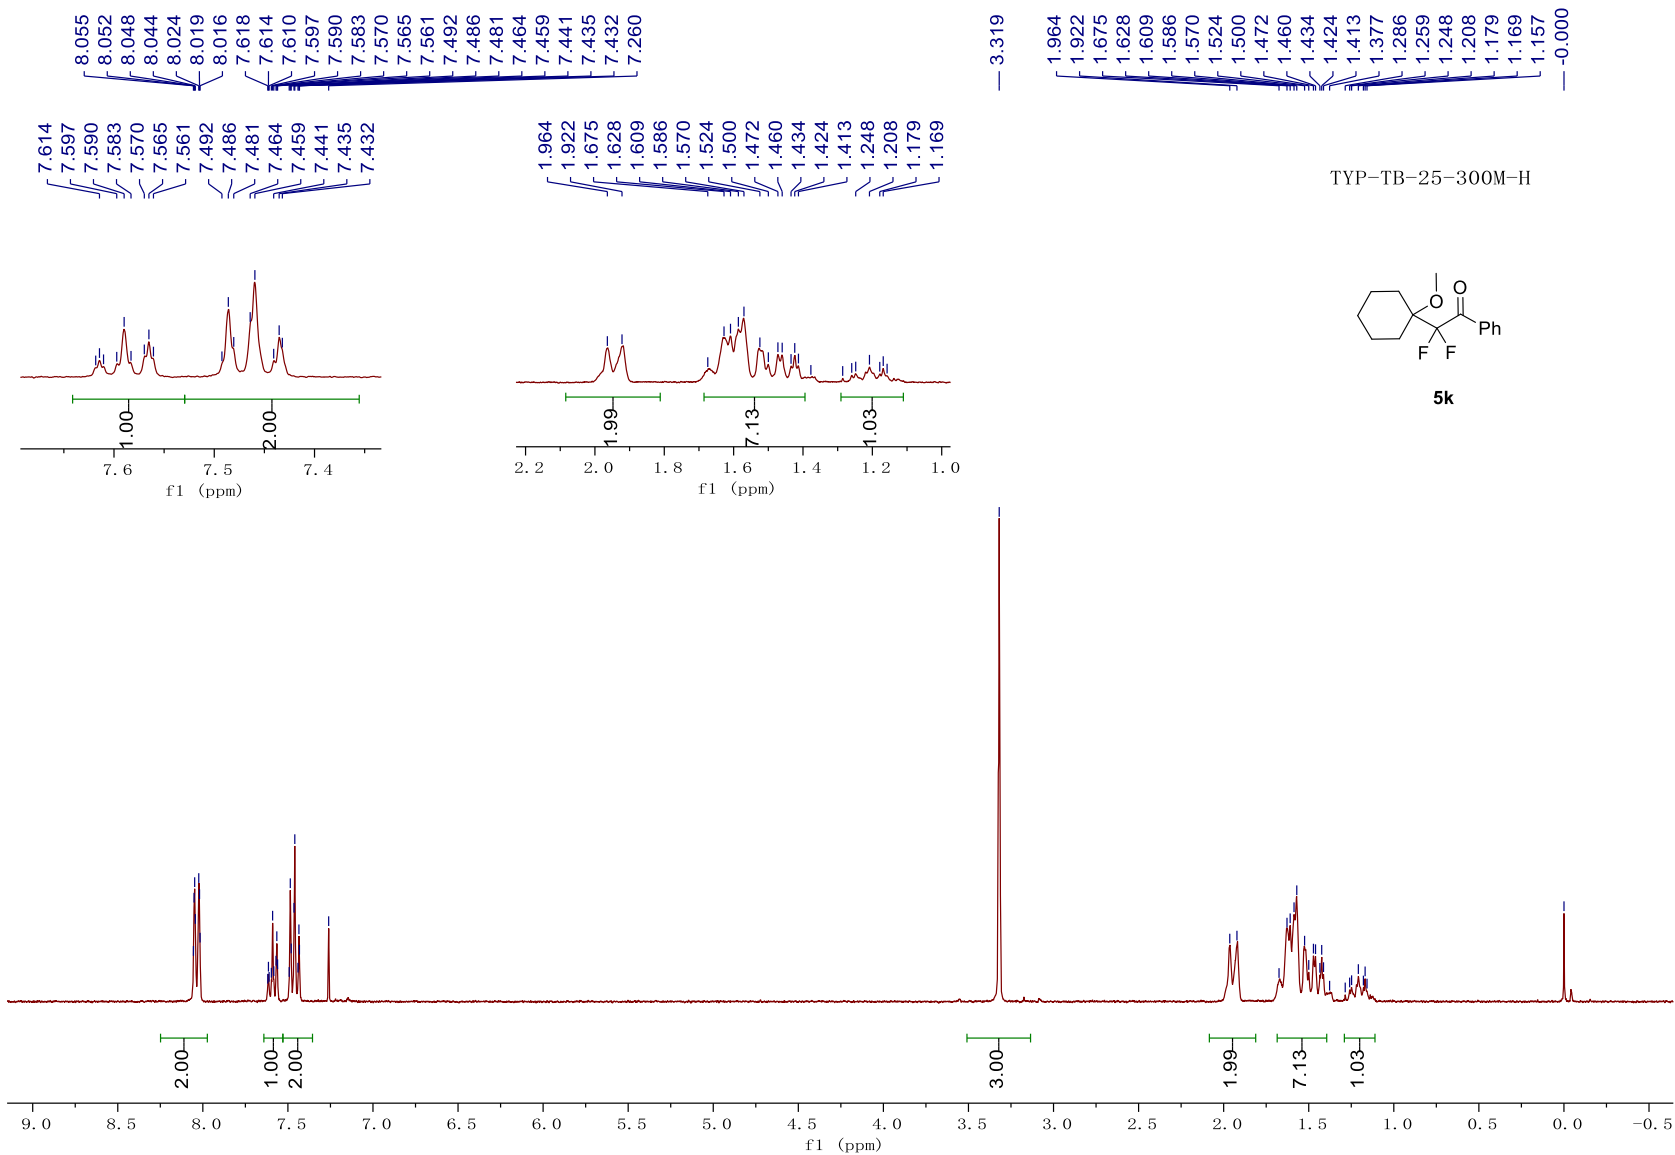

TYP-TB-25-300M-H

5k

191.521  
191.243  
190.964

135.104  
135.089  
135.071  
133.543  
129.913  
129.869  
129.829  
128.426  
122.953  
120.327  
117.701

78.007  
77.786  
77.563  
77.404  
77.087  
76.770

51.649  
51.627  
51.609

27.883  
27.856  
27.827  
25.020  
21.000

TYP-TB-25-400M-C

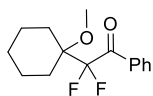

5k

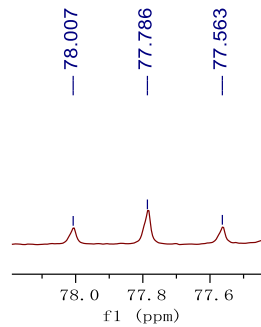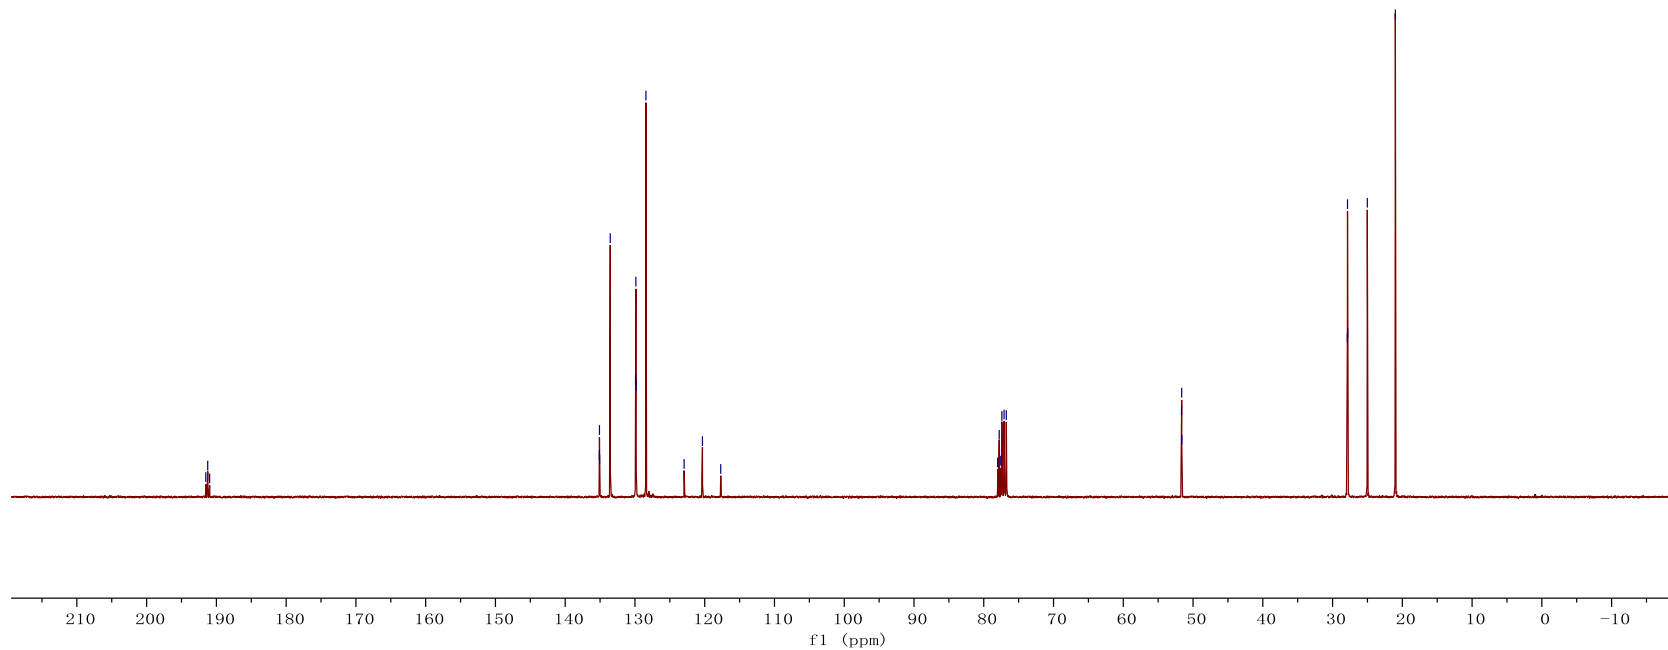

TYP-TB-25-300M-F

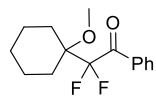

5k

-108.252

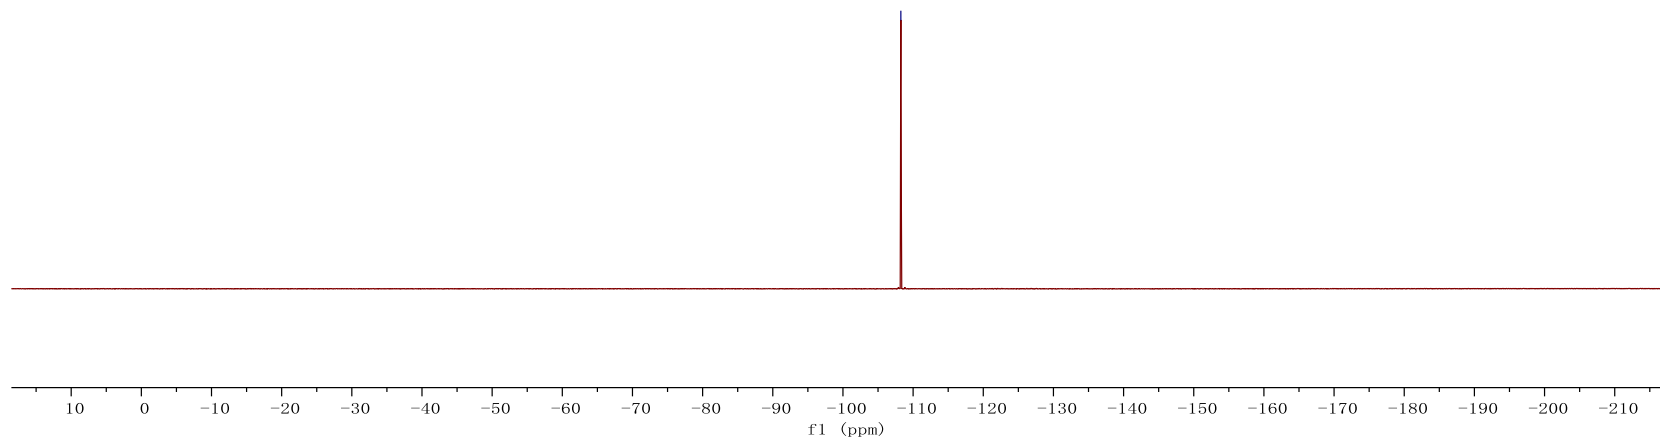

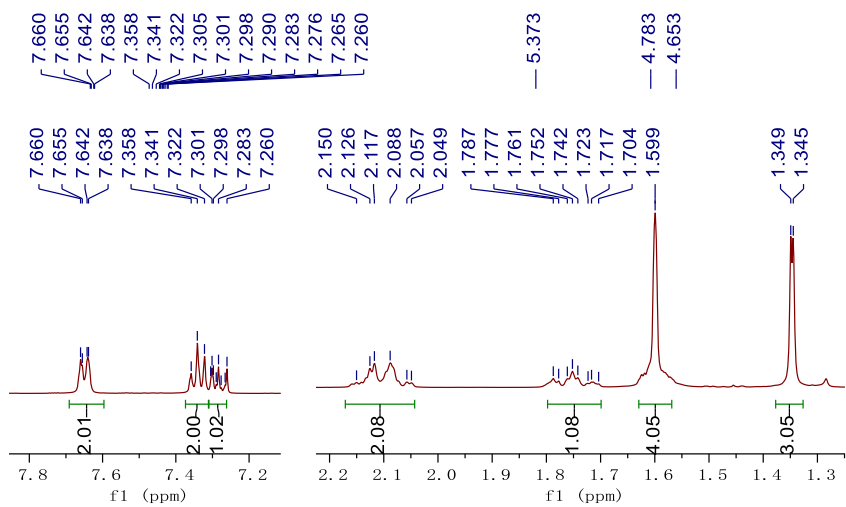

GOY-GD-36-400M-H

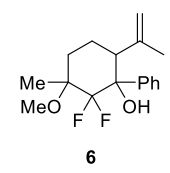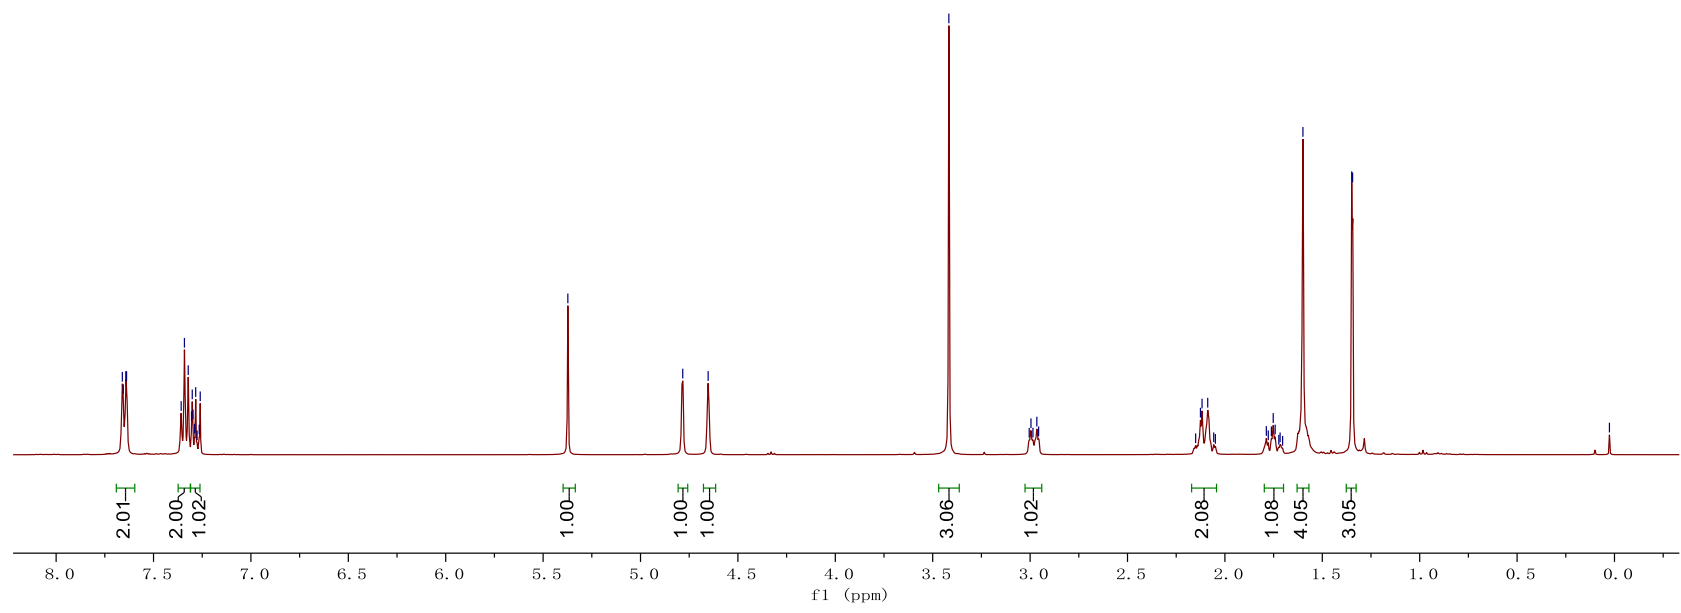



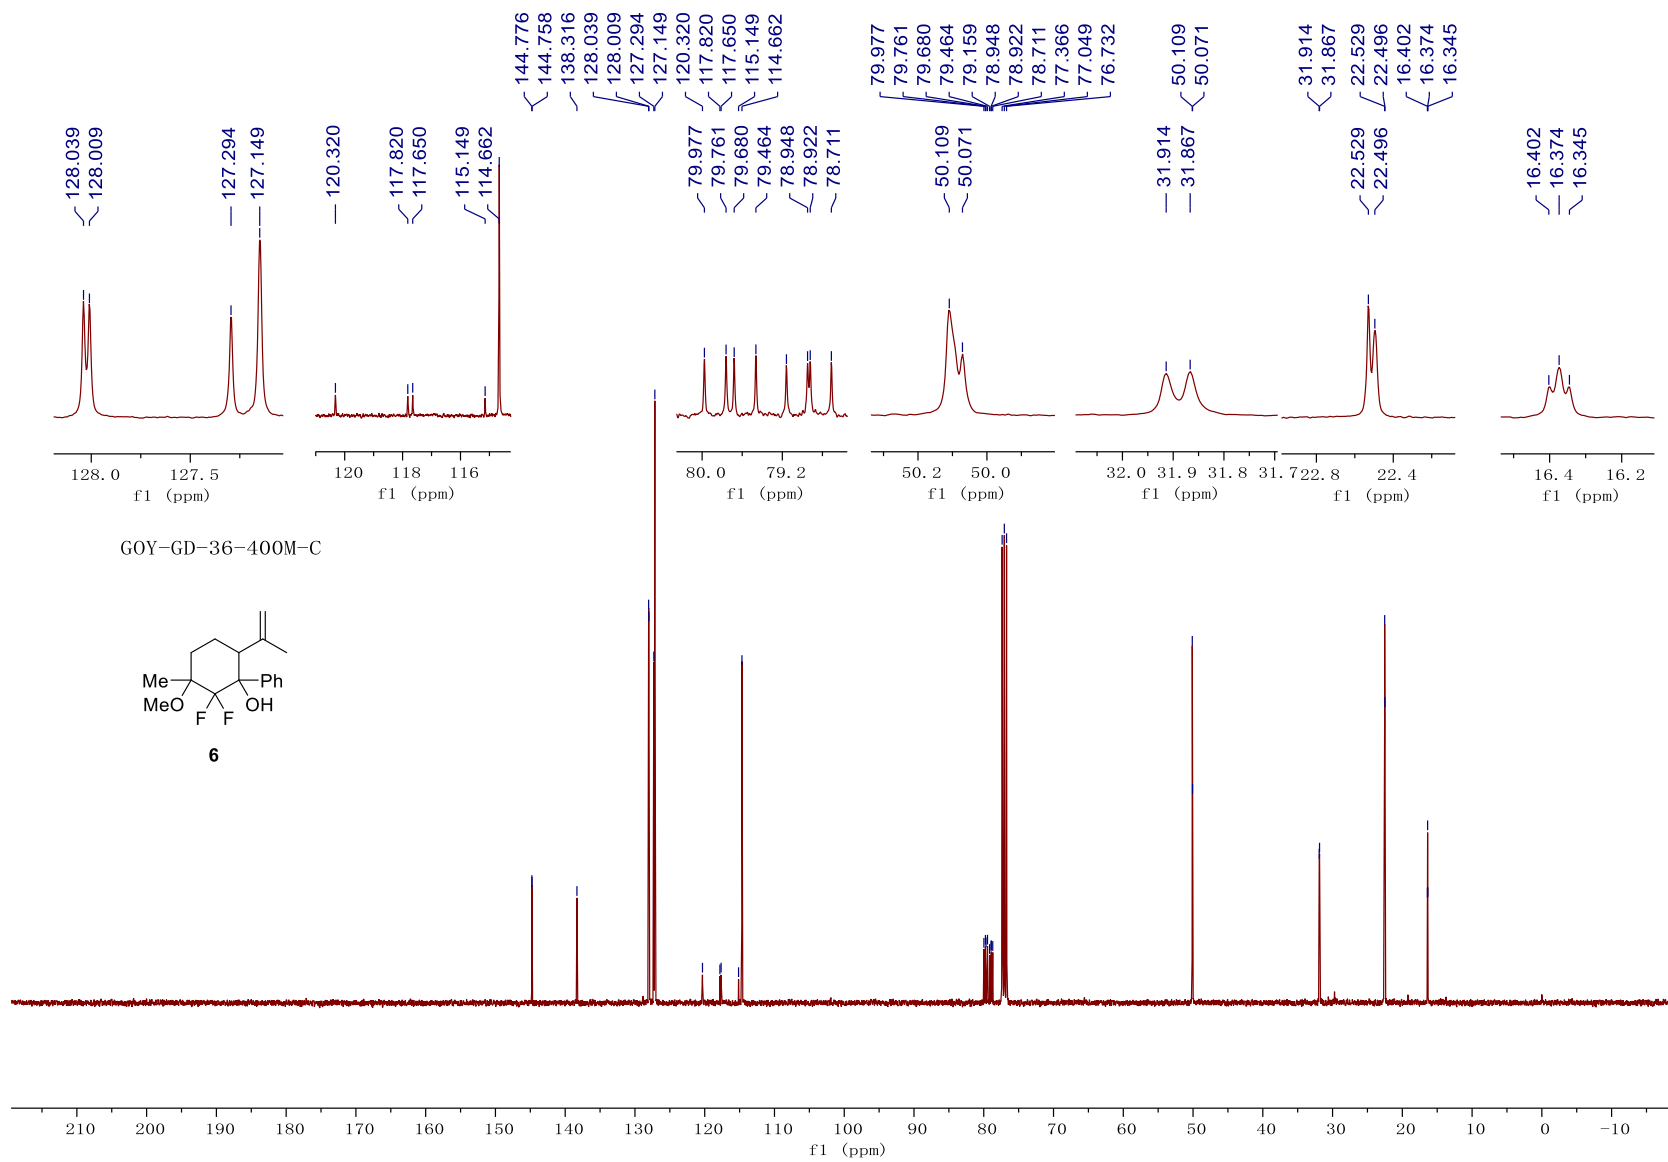

GOY-GD-36-400M-F

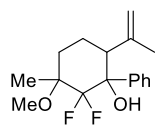

**6**

-110.051  
-110.743

-128.130  
-128.822

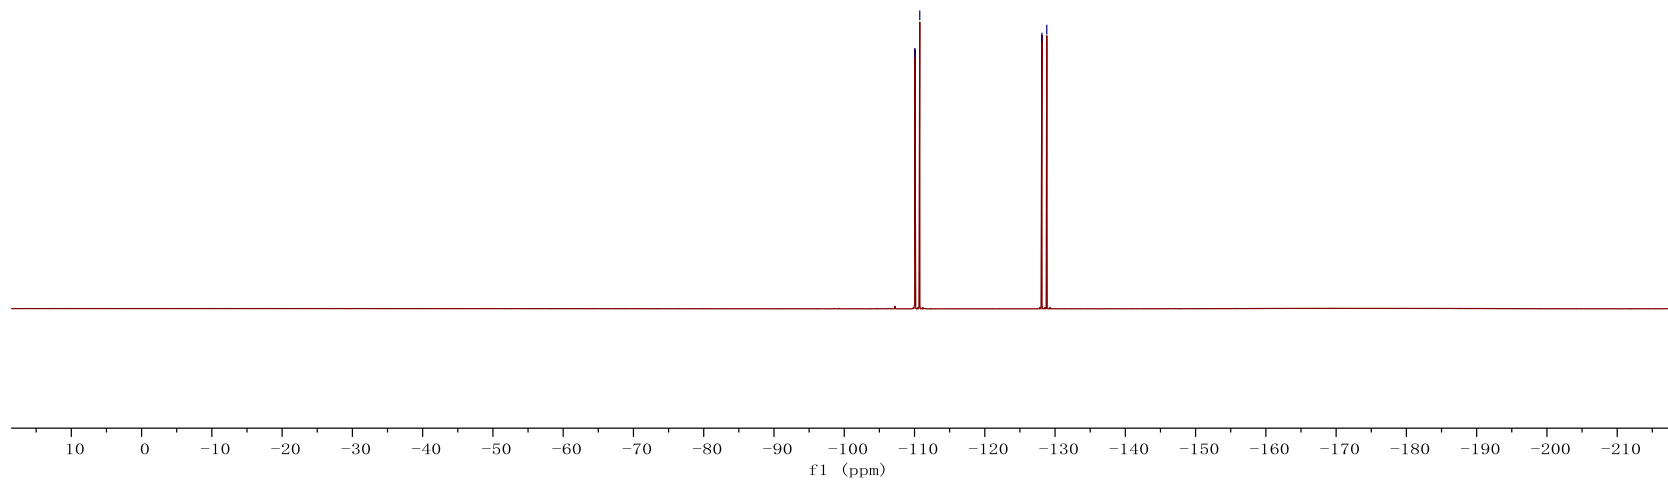

GOY-GD-36-400M-DEPT45

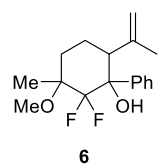

128.039  
128.010  
127.304  
127.157  
— 114.671

50.097  
50.057

31.881  
31.834  
22.536  
22.485  
16.403  
16.375  
16.347

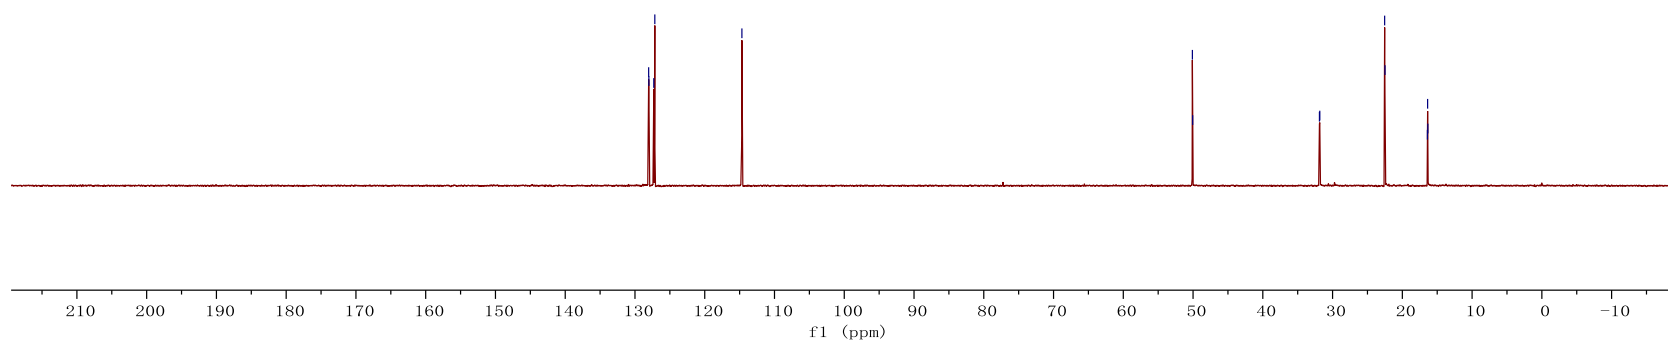

GOY-GD-36-400M-DEPT90

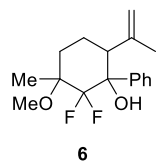

128.051  
128.020  
127.318  
127.170

50.099  
50.060

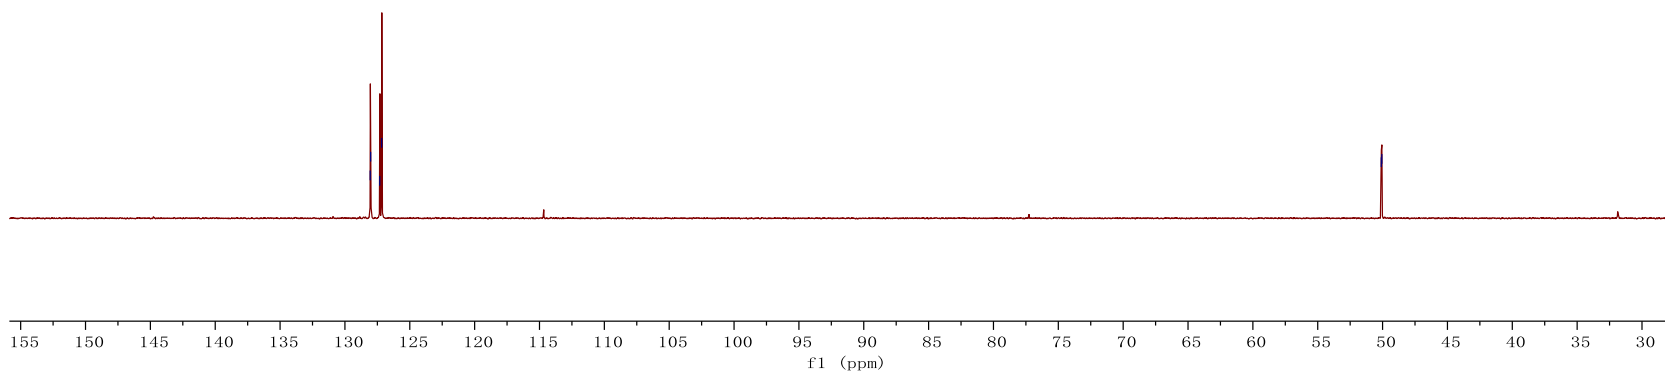

GOY-GD-36-400M-DEPT135

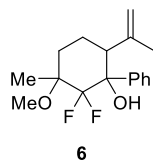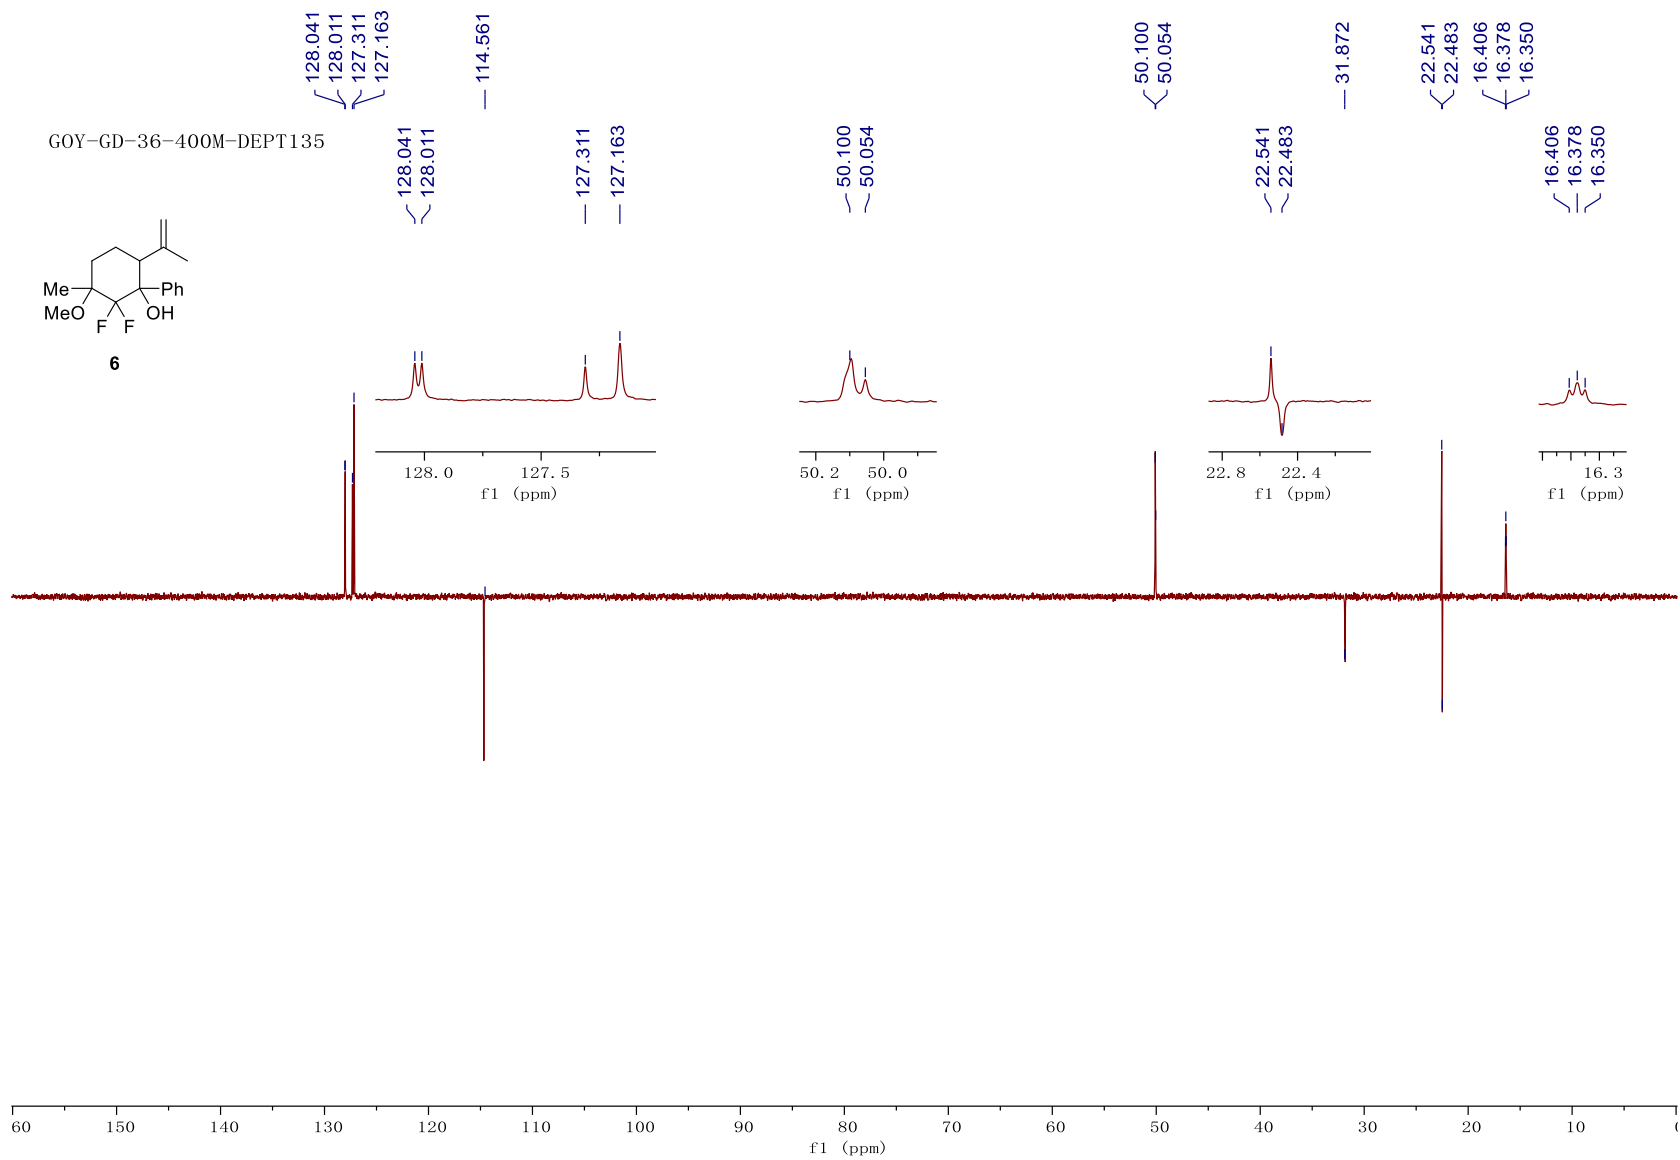

GOY-00-36- COSY 1 C:\Bruker\TopSpin3.6.1\exdata

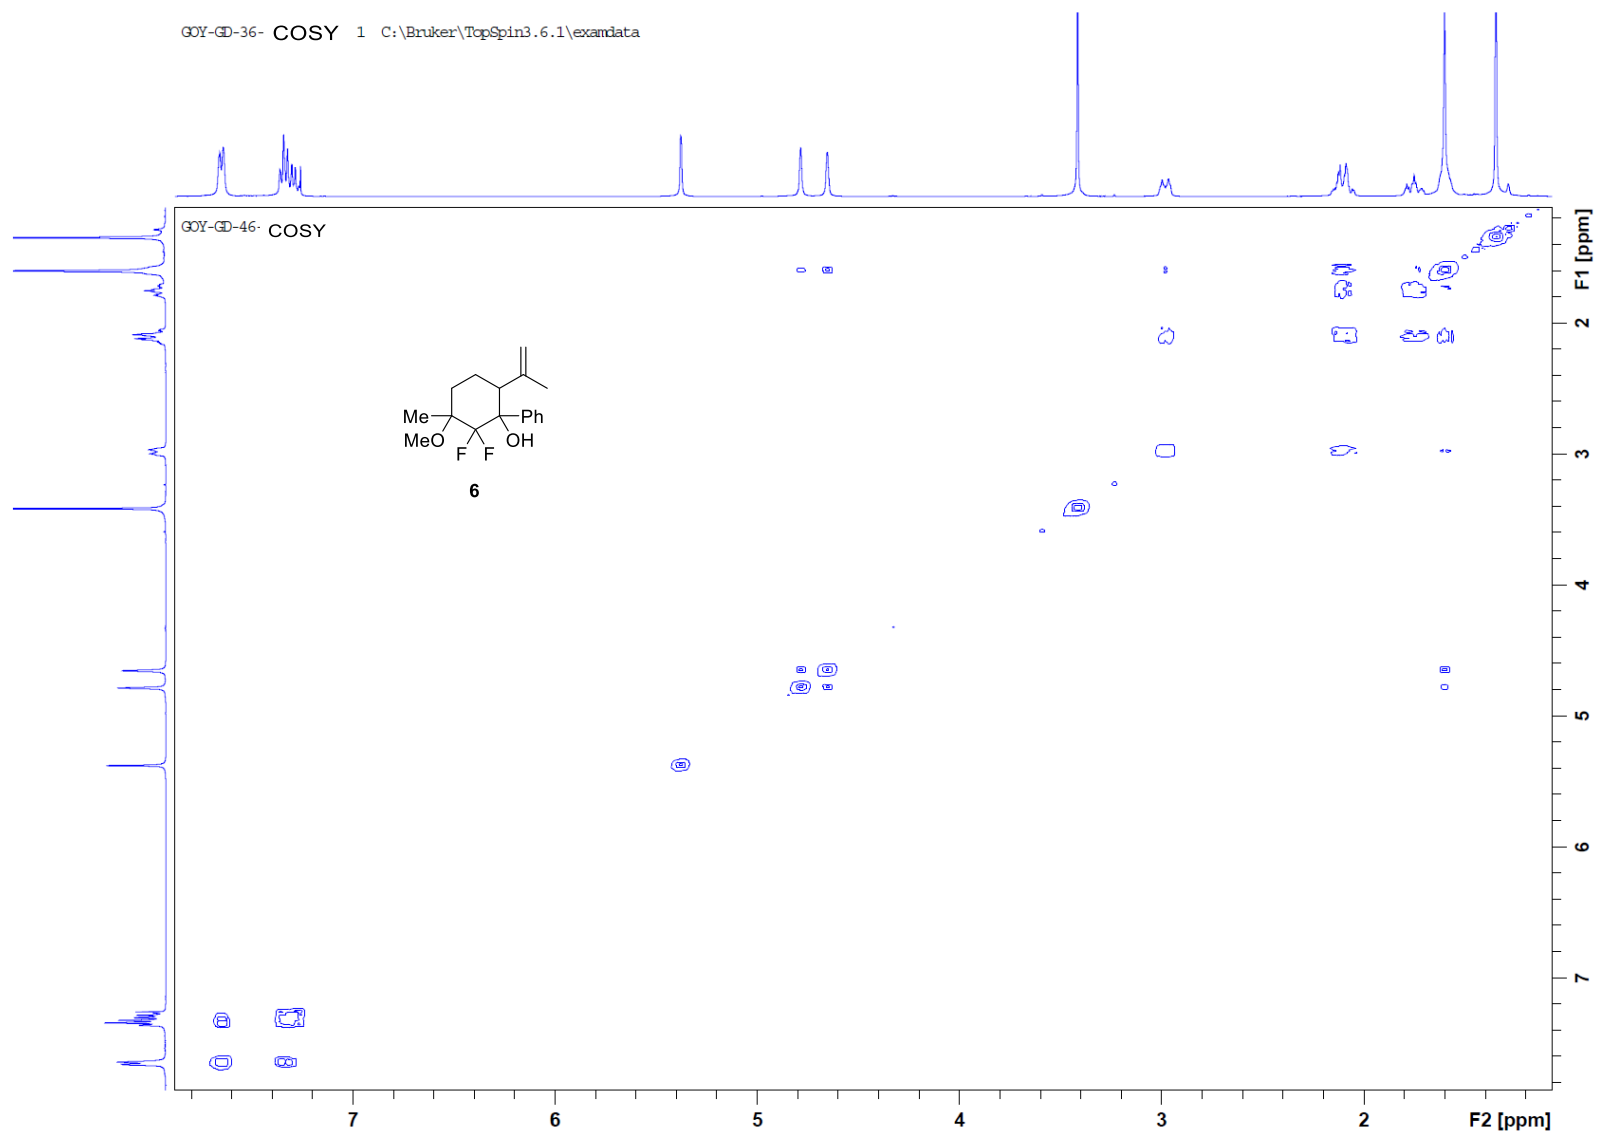

GOY-GD-36HSQC 16 1 C:\Bruker\TopSpin3.6.1\examdata

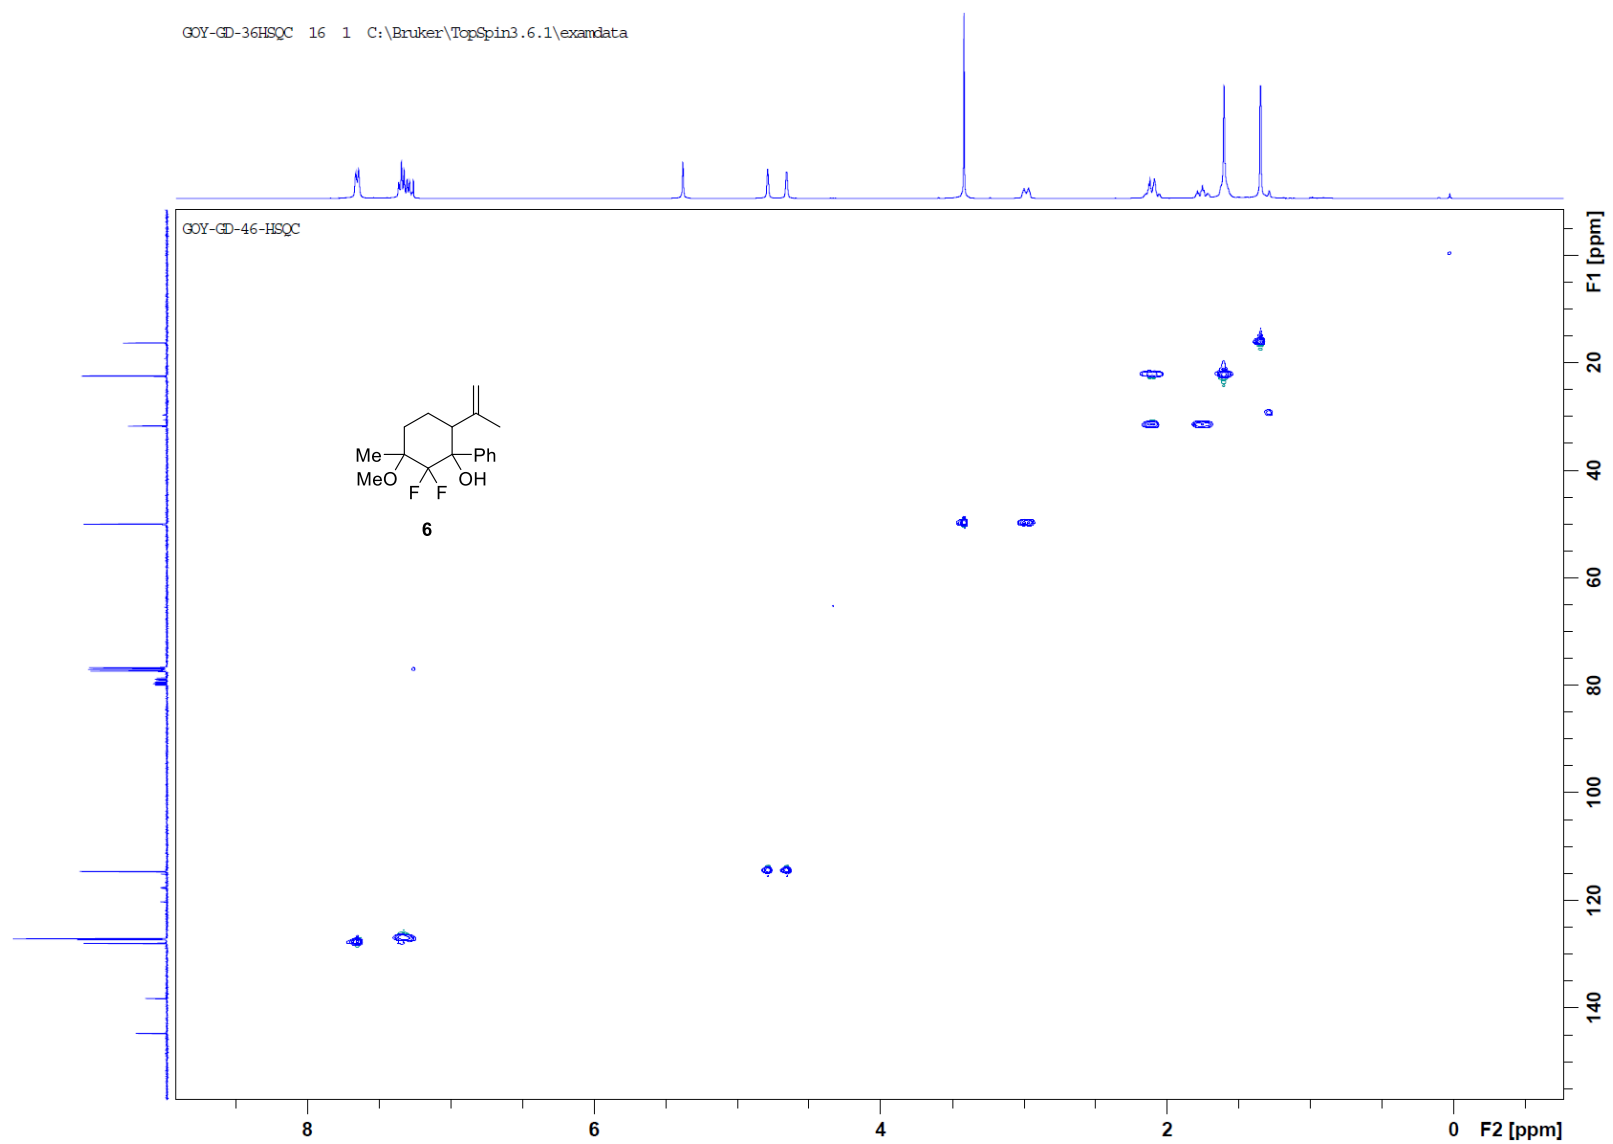

GOY-GD-36-HMBC 15 1 C:\Bruker\TopSpin3.6.1\examdata

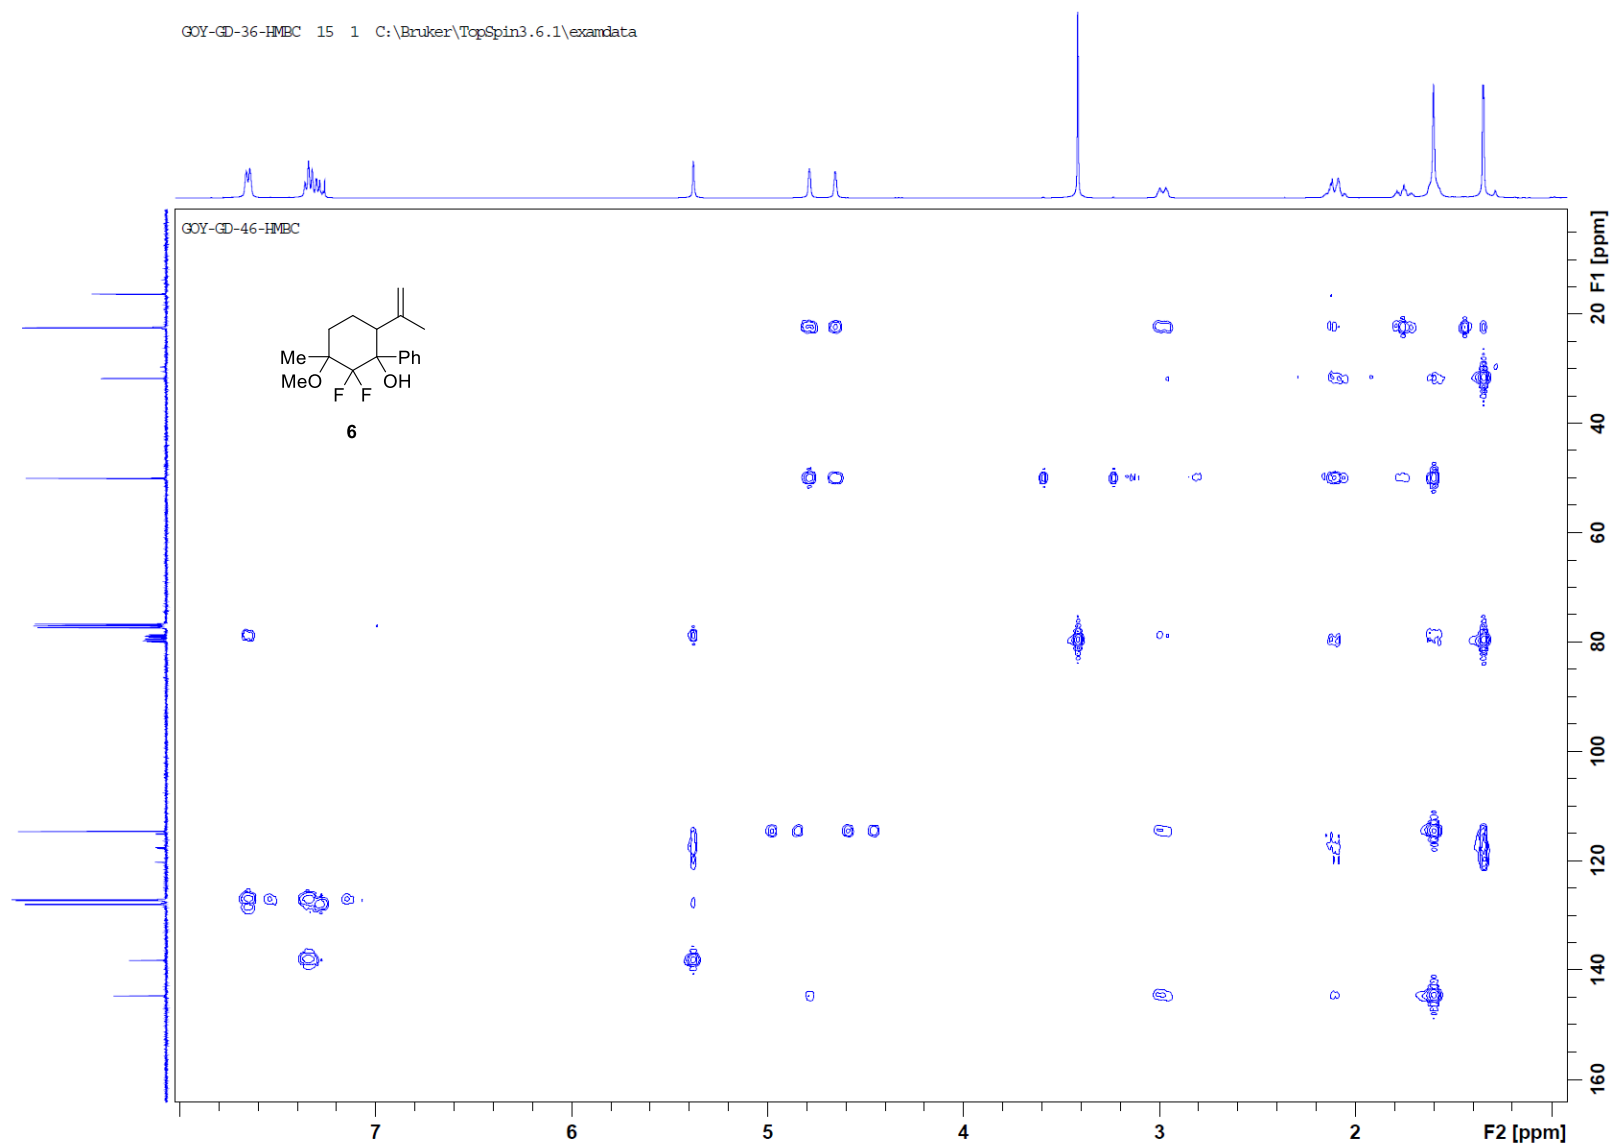



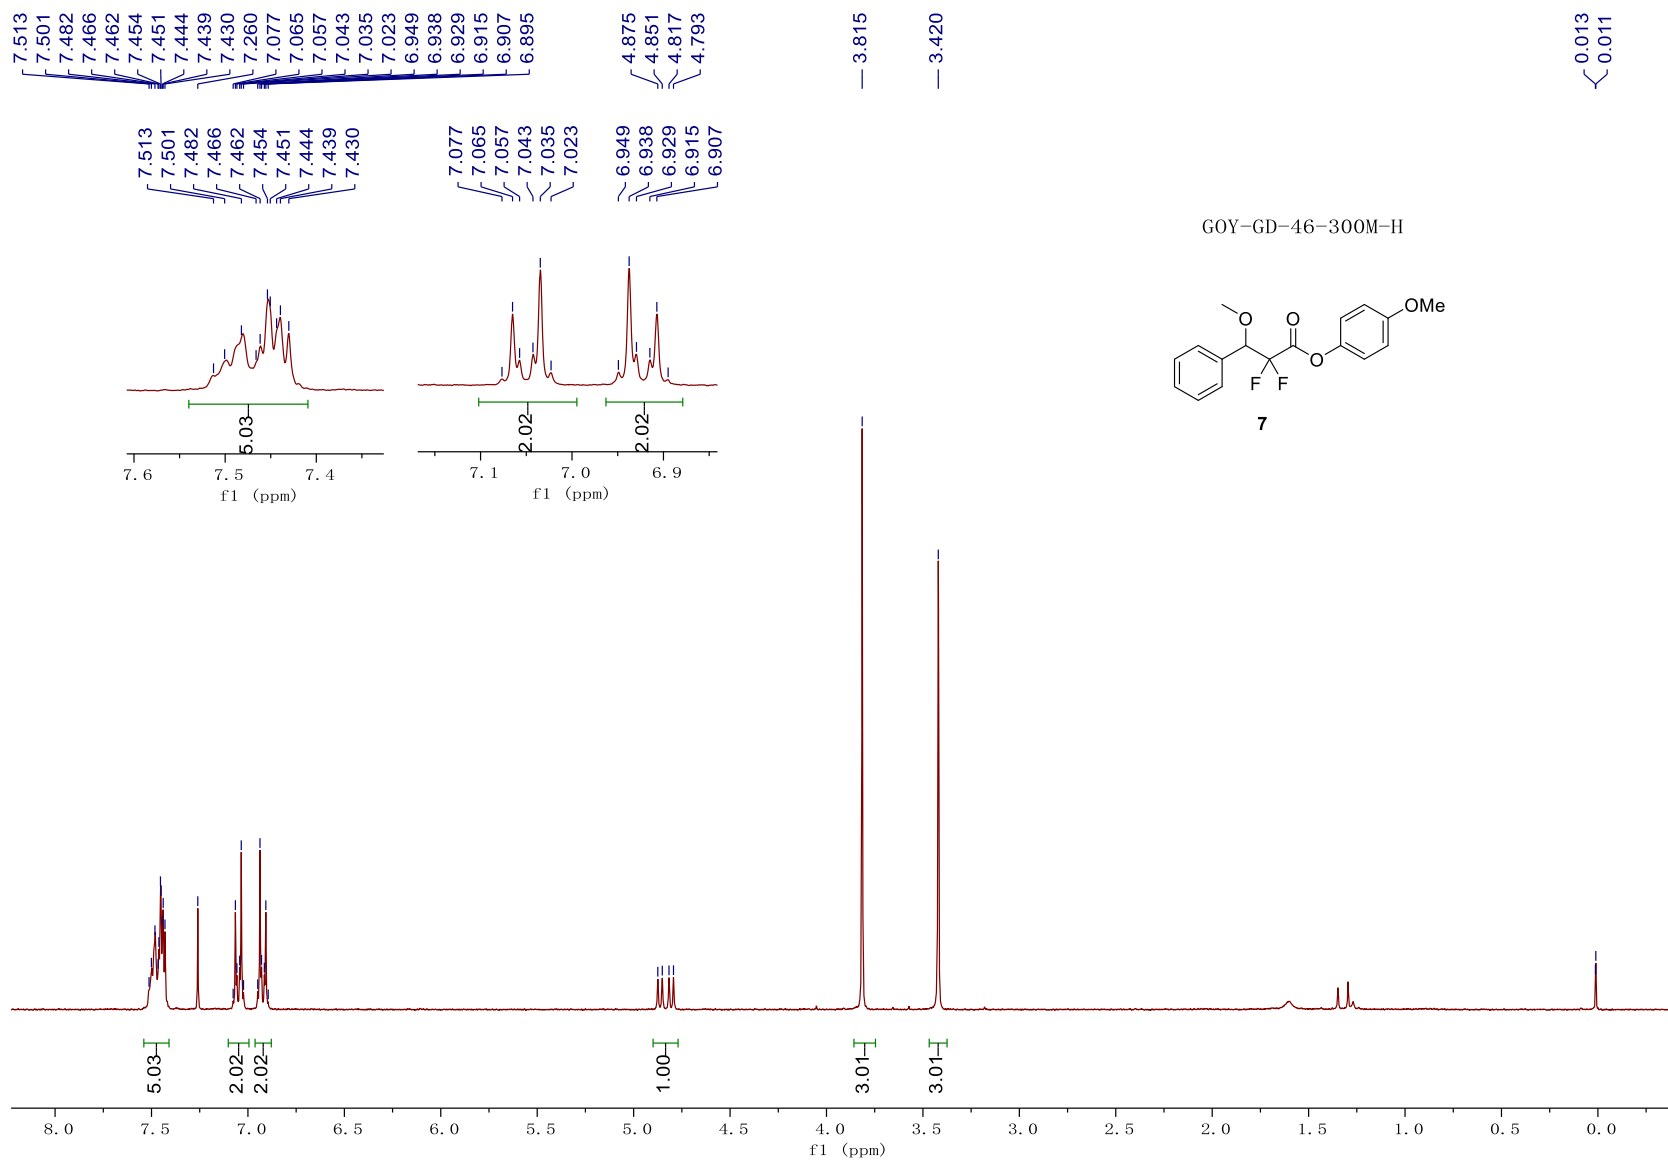

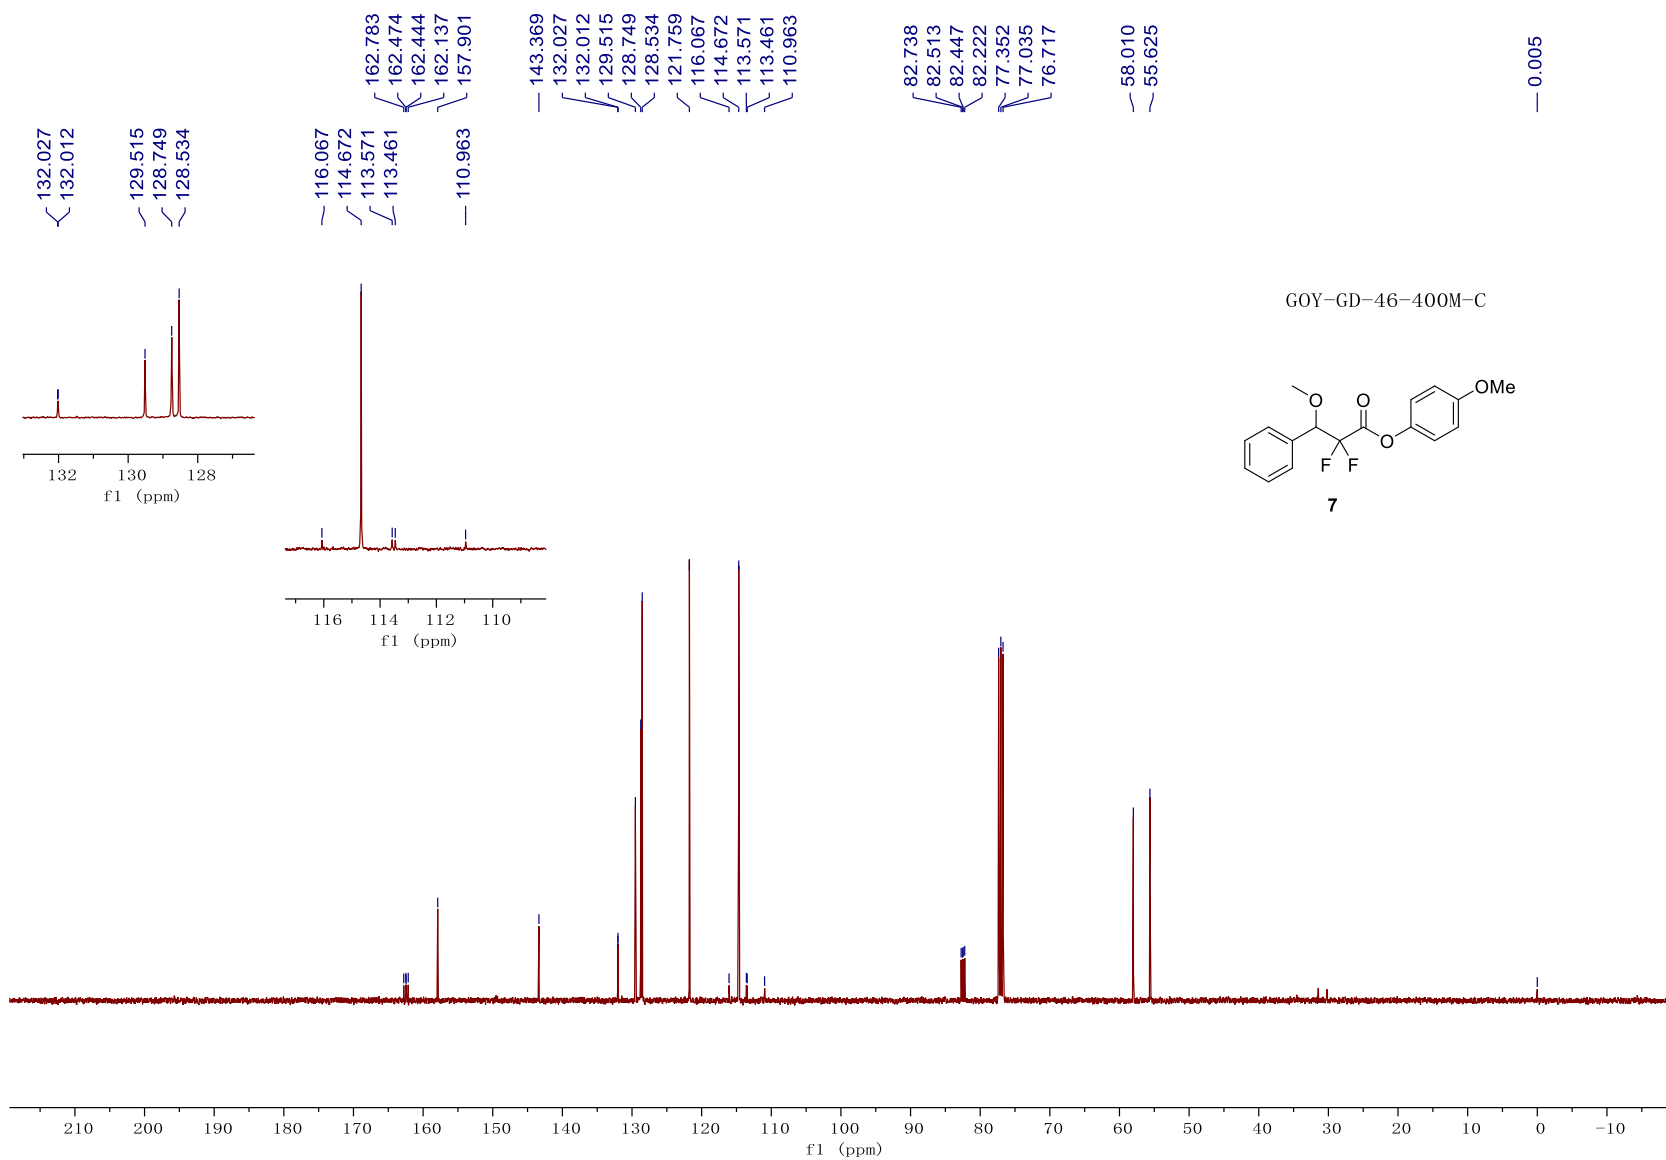

-110.691  
-110.716  
-111.620  
-111.643  
-120.991  
-121.048  
-121.917  
-121.974

GOY-GD-46-300M-F

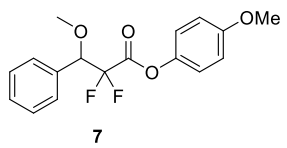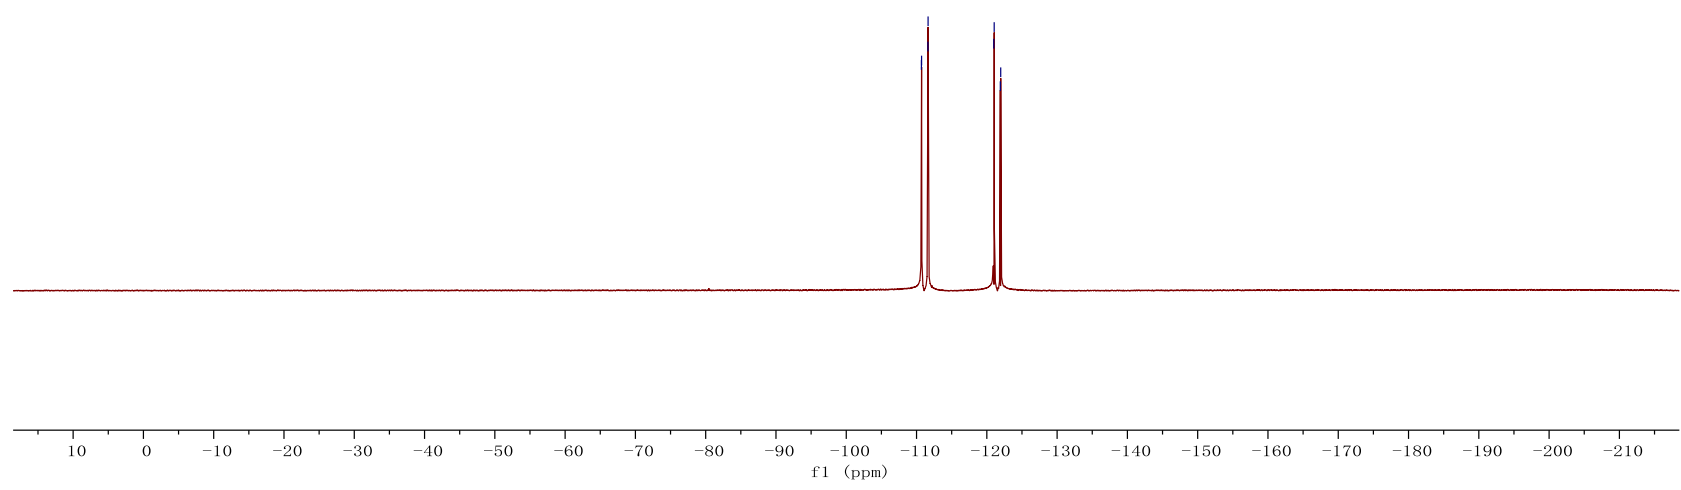

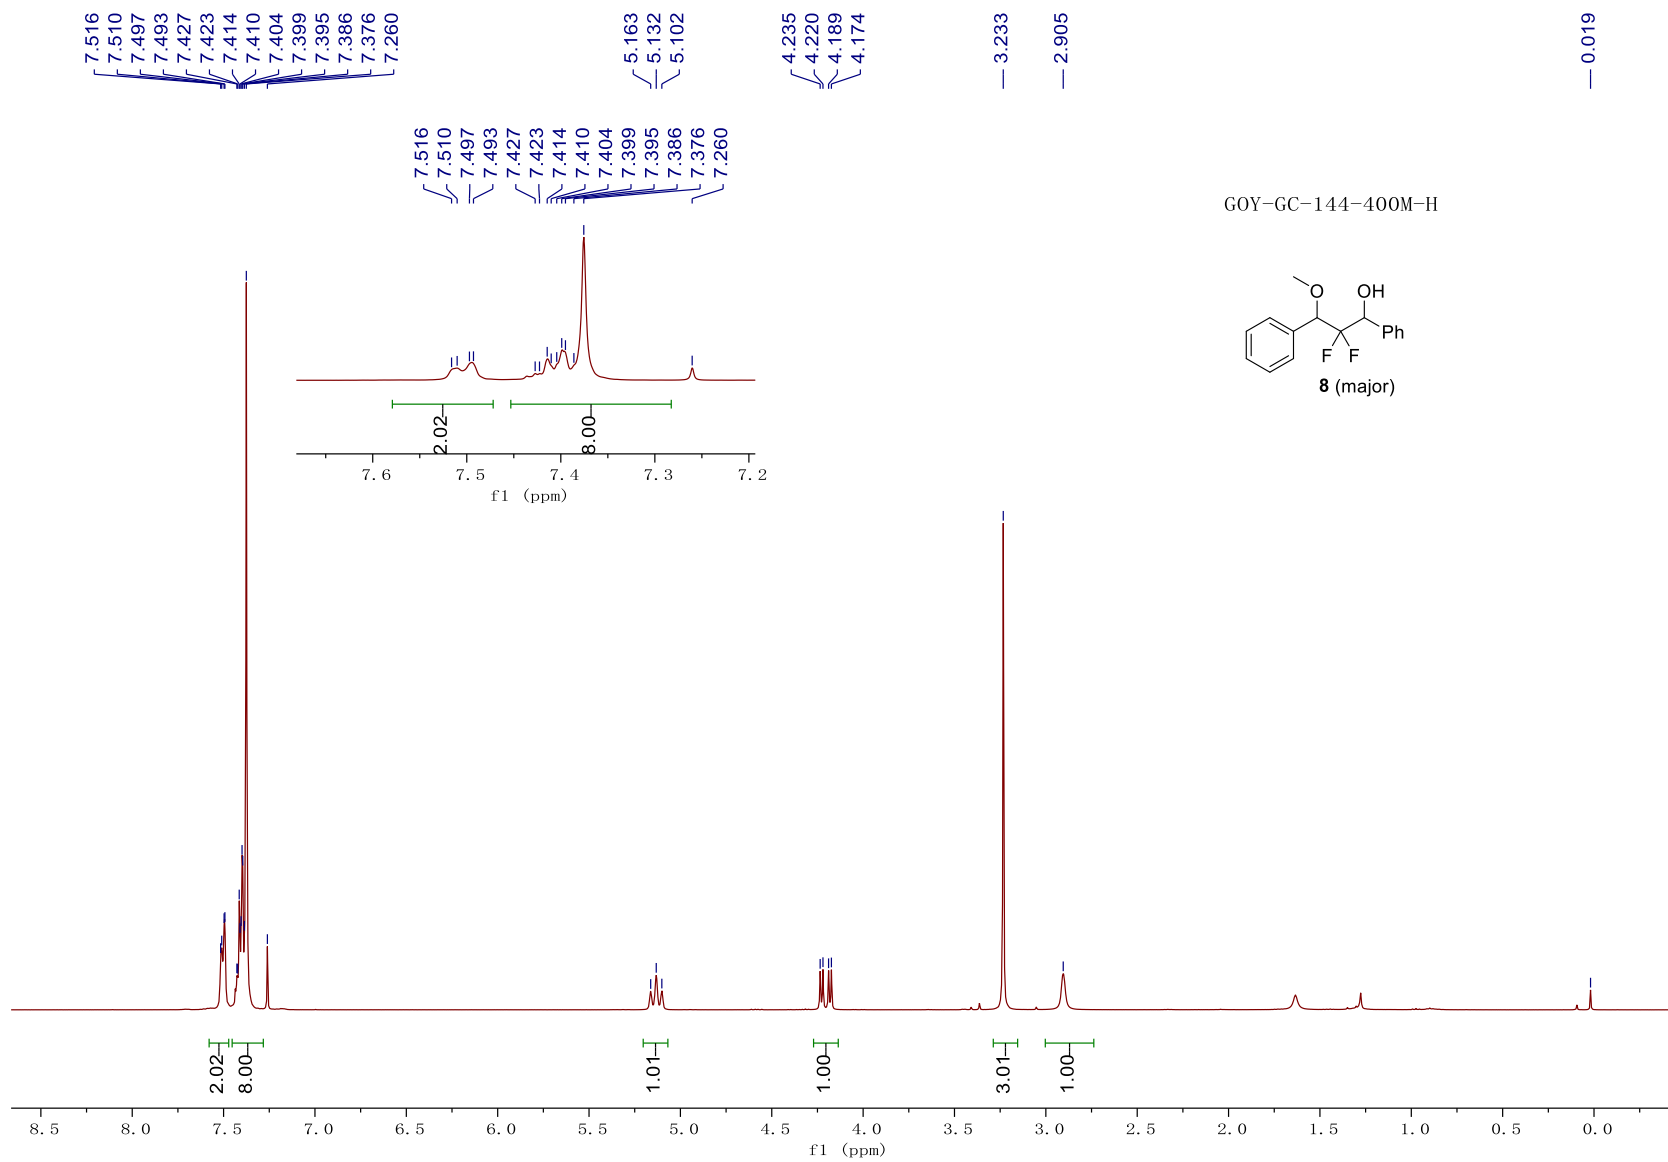

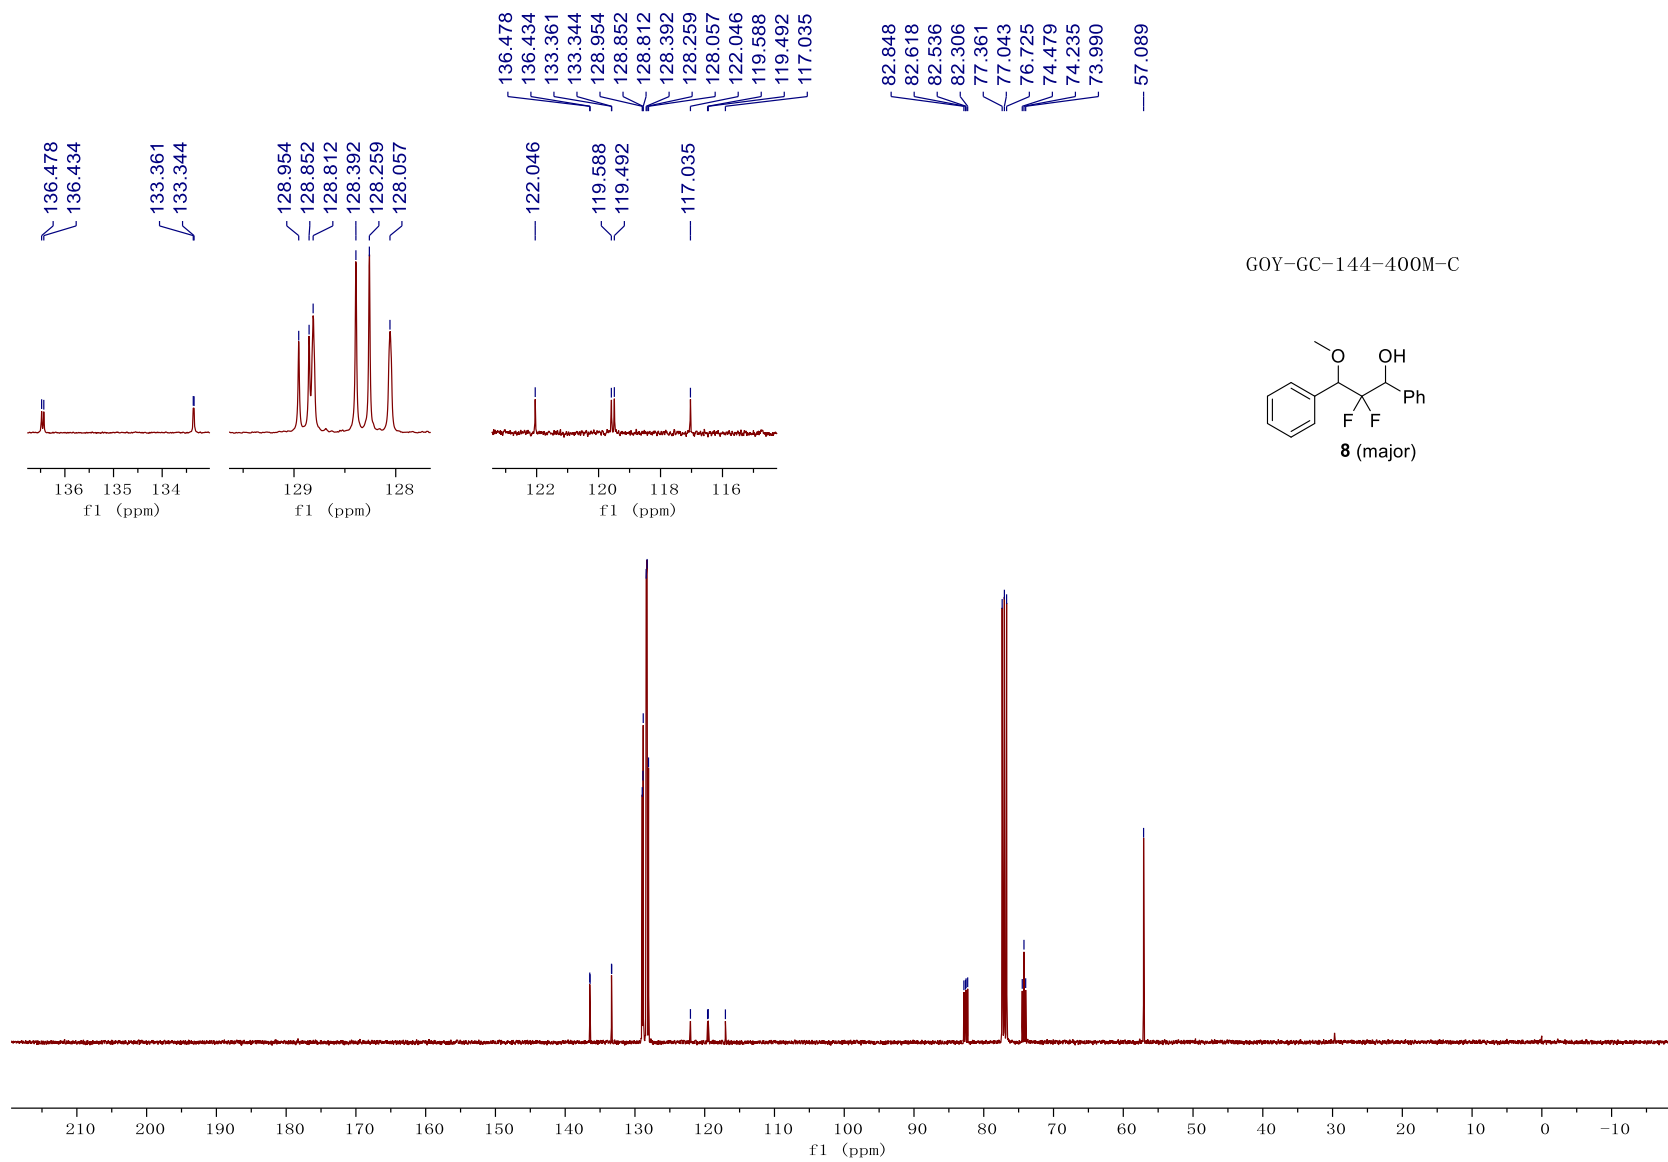

GOY-GC-144-400M-F

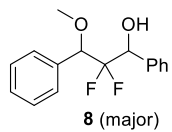

-119.574  
-120.254  
-124.260  
-124.940

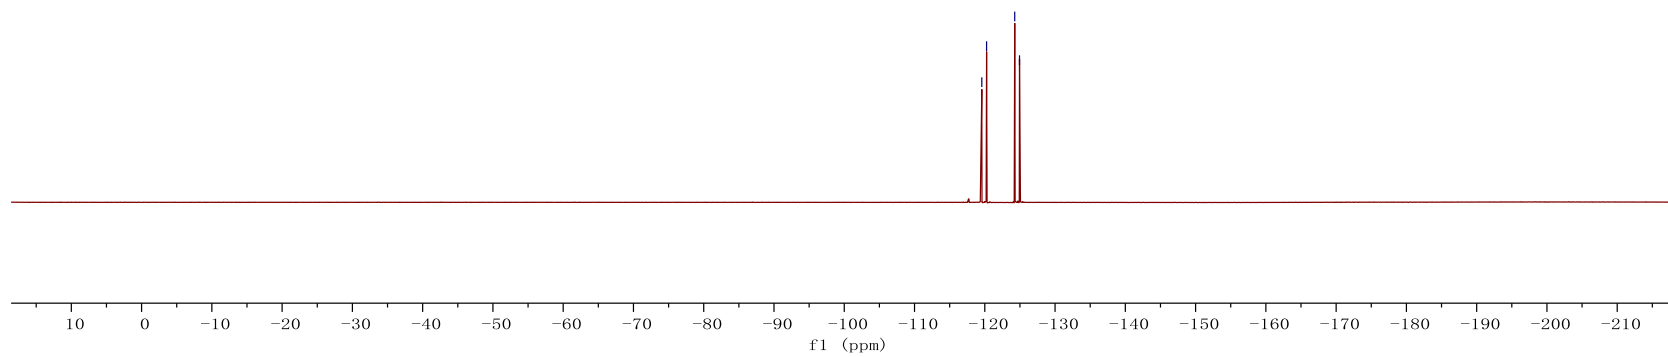

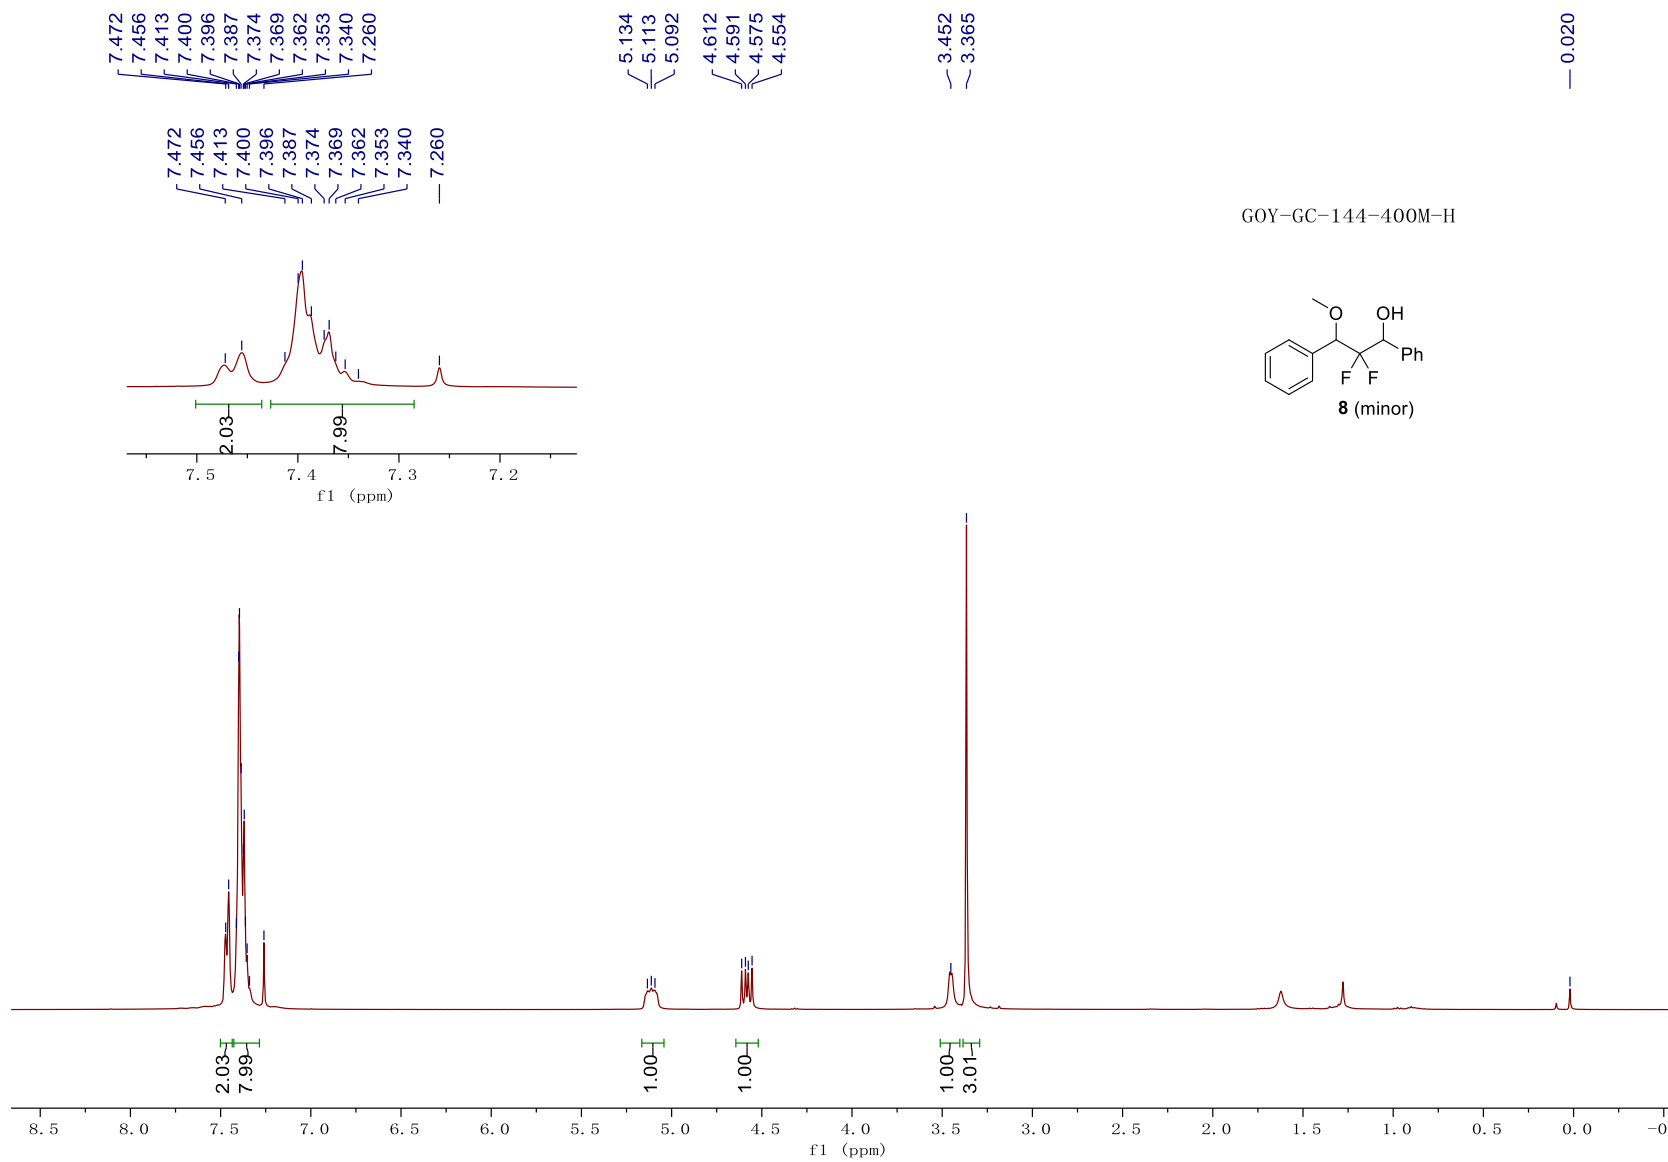

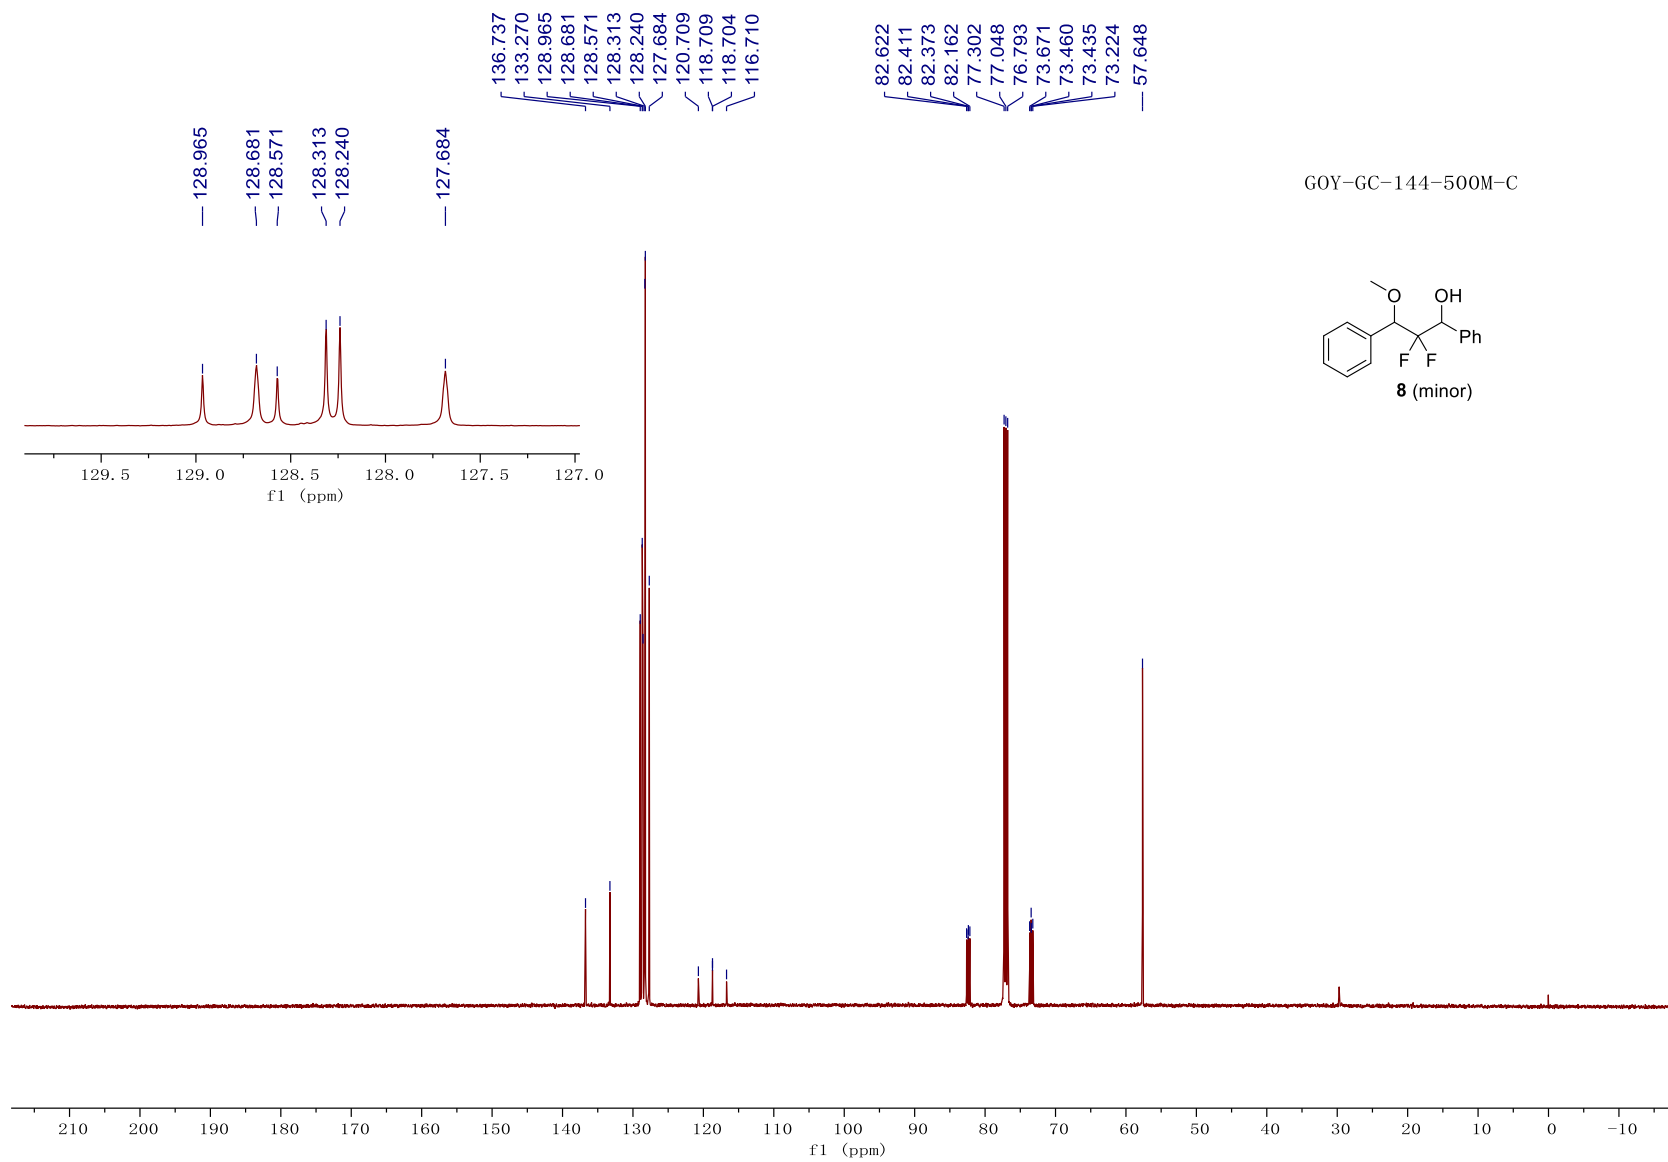



GOY-GC-144-400M-F

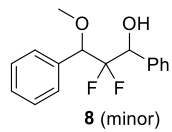

-116.932  
-117.640  
-117.723  
-118.431

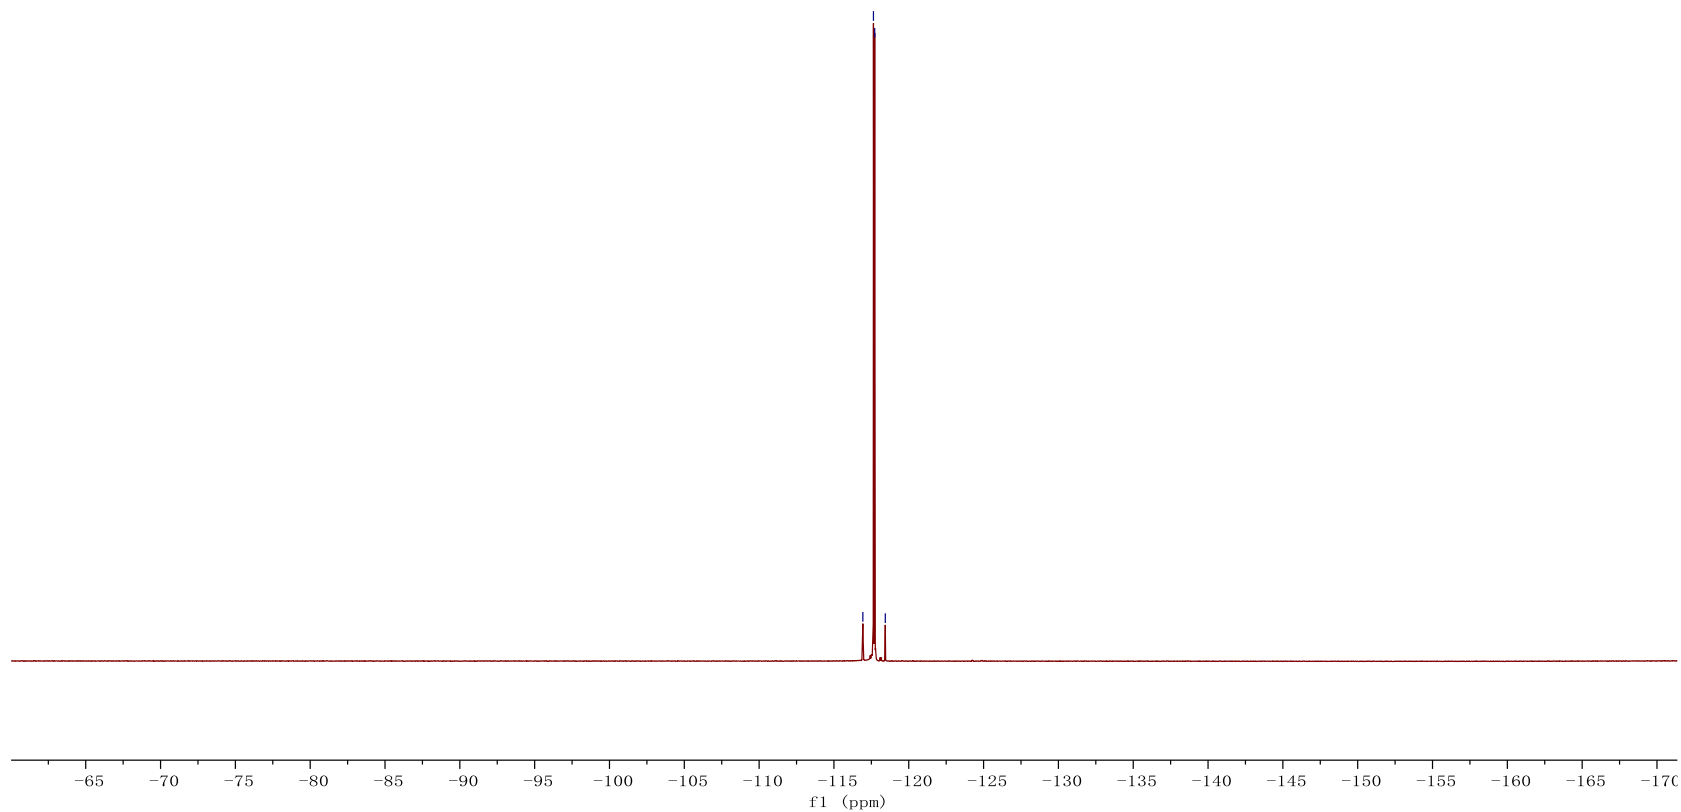

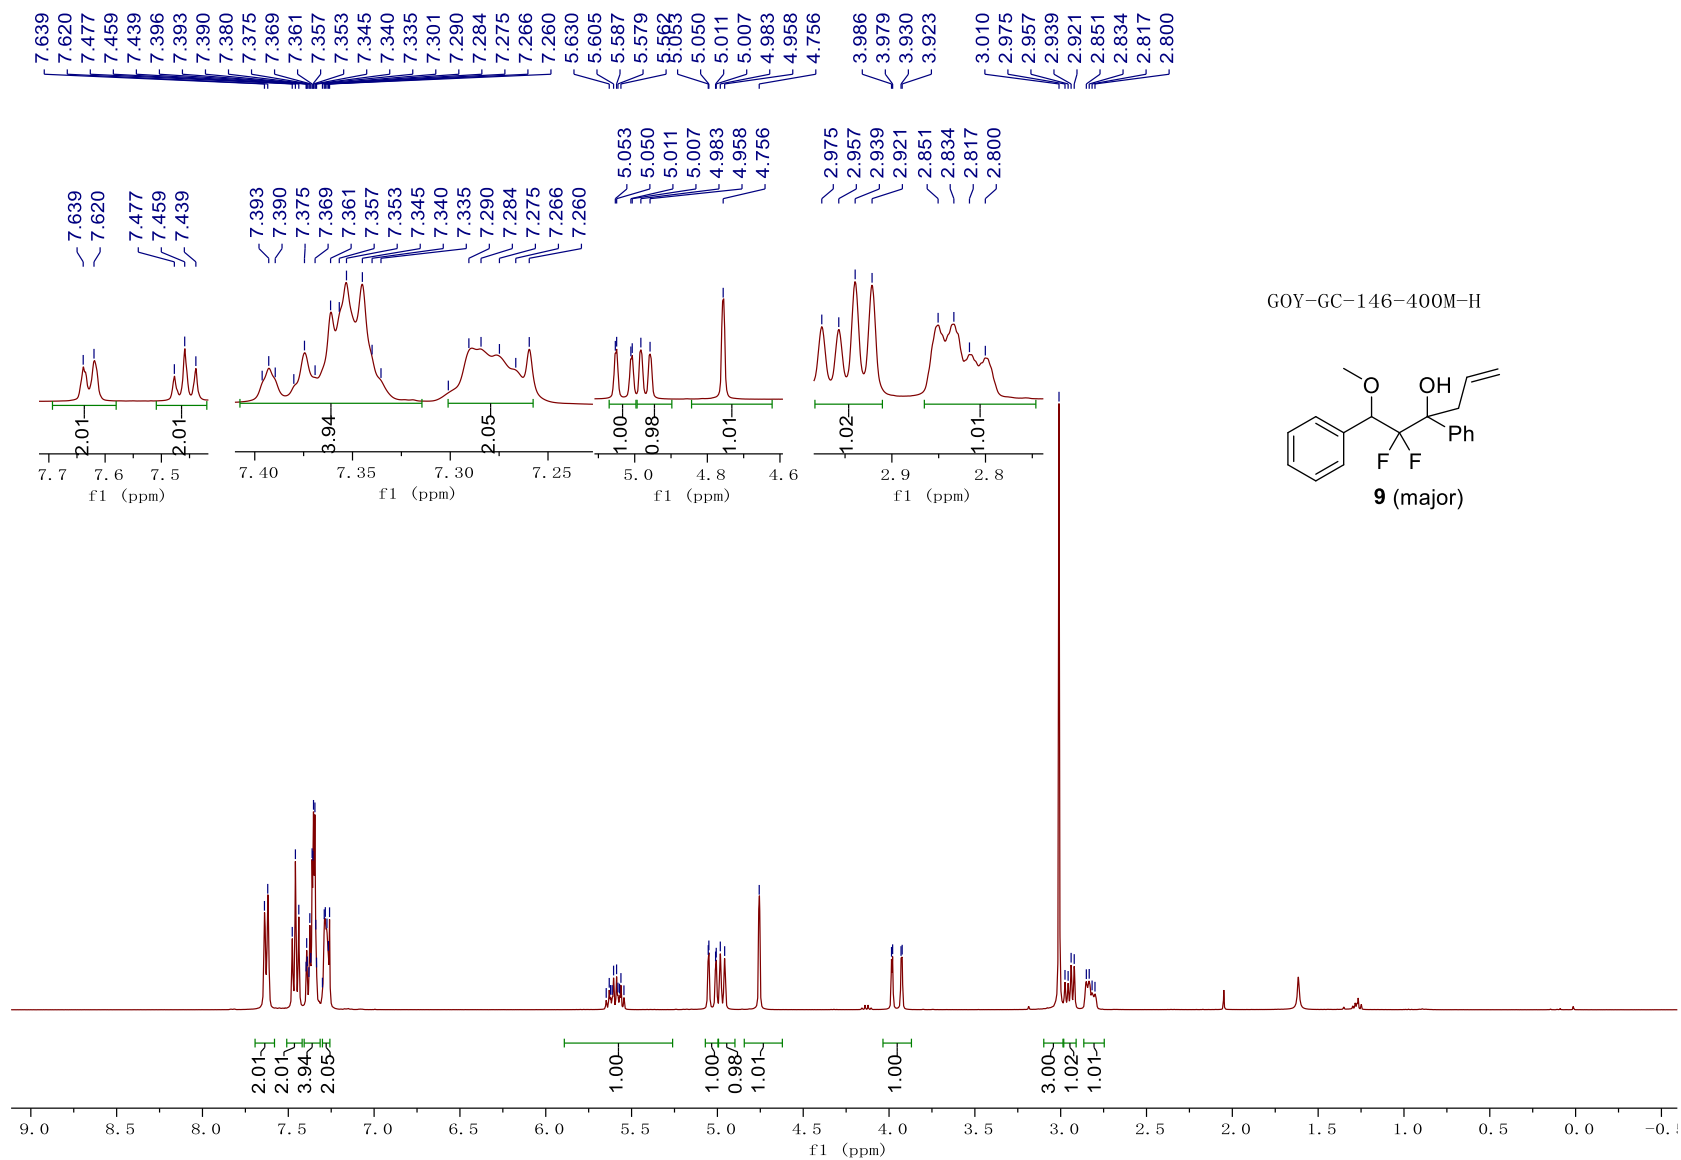

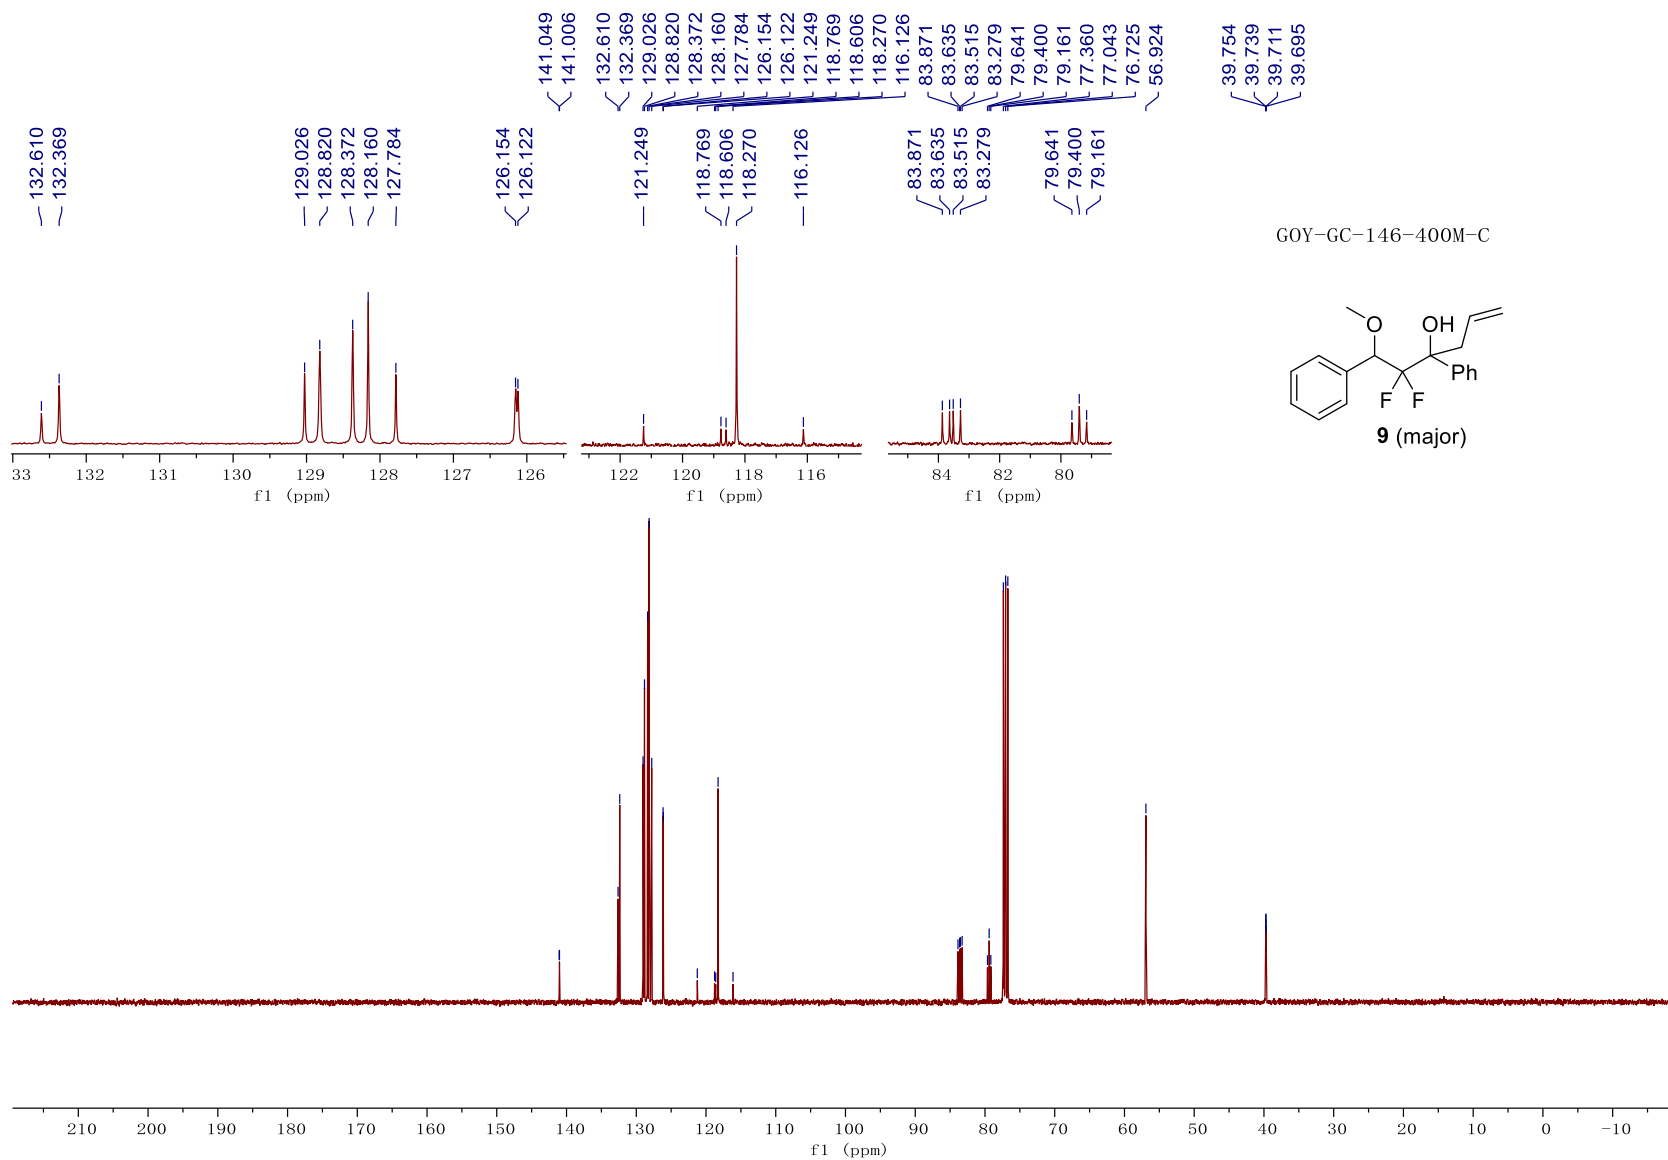

GOY-GC-146-400M-F

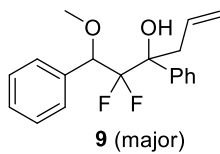

-110.301  
-111.008

-126.179  
-126.886

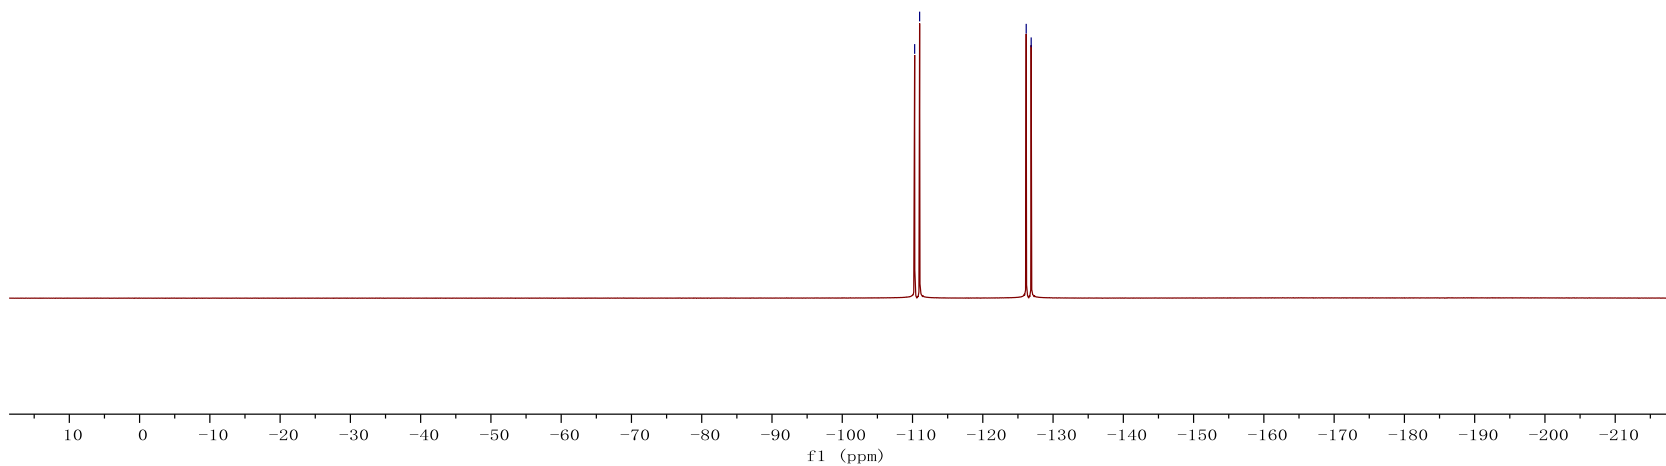

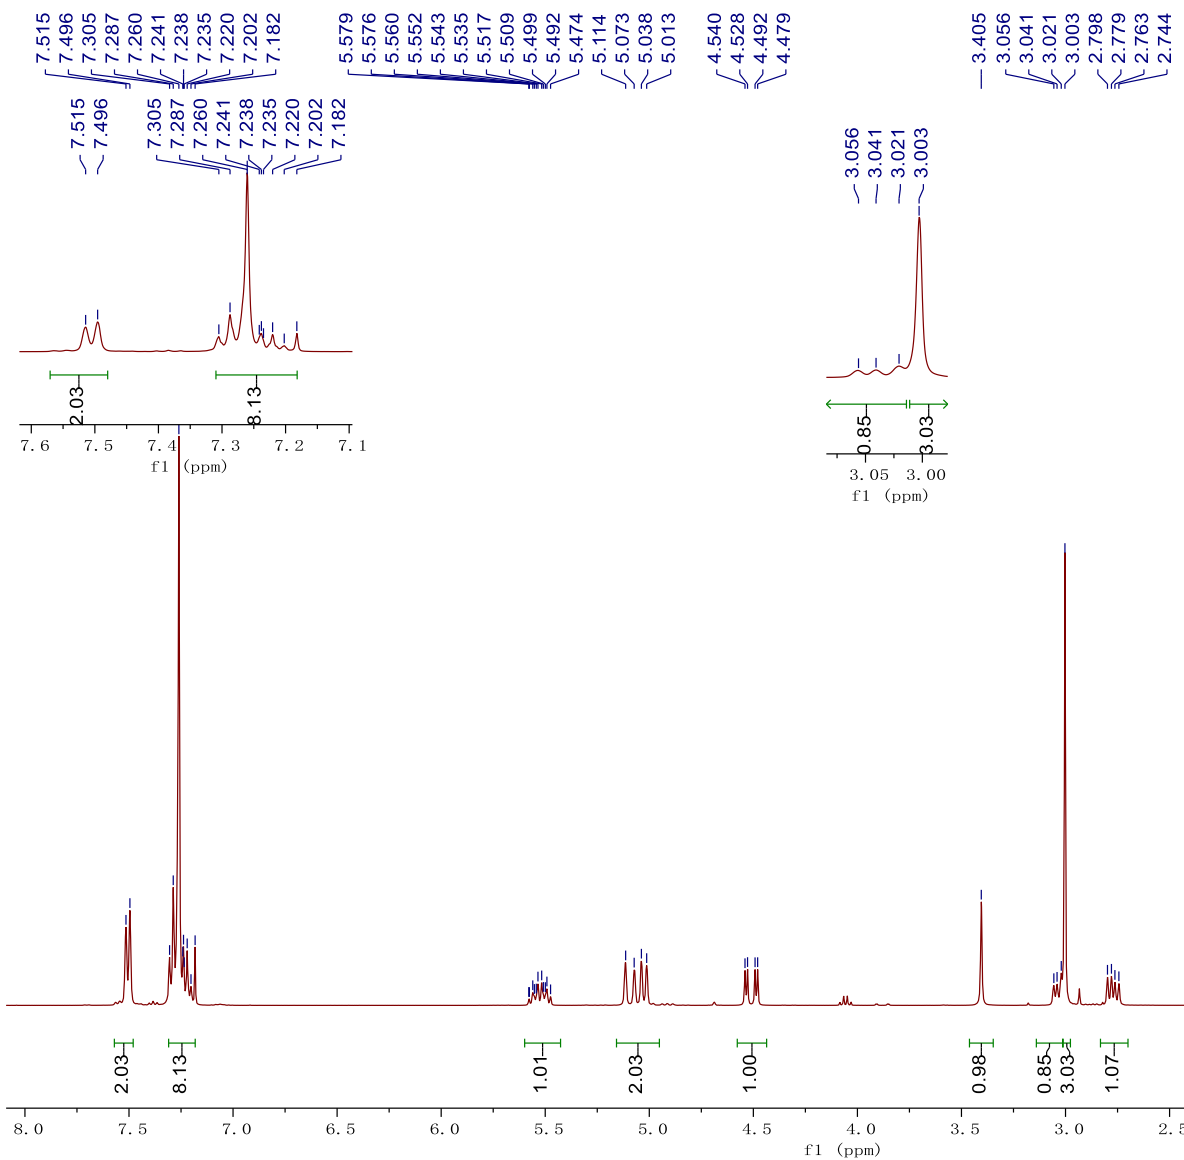

GOY-GC-146-400M-H

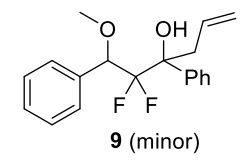

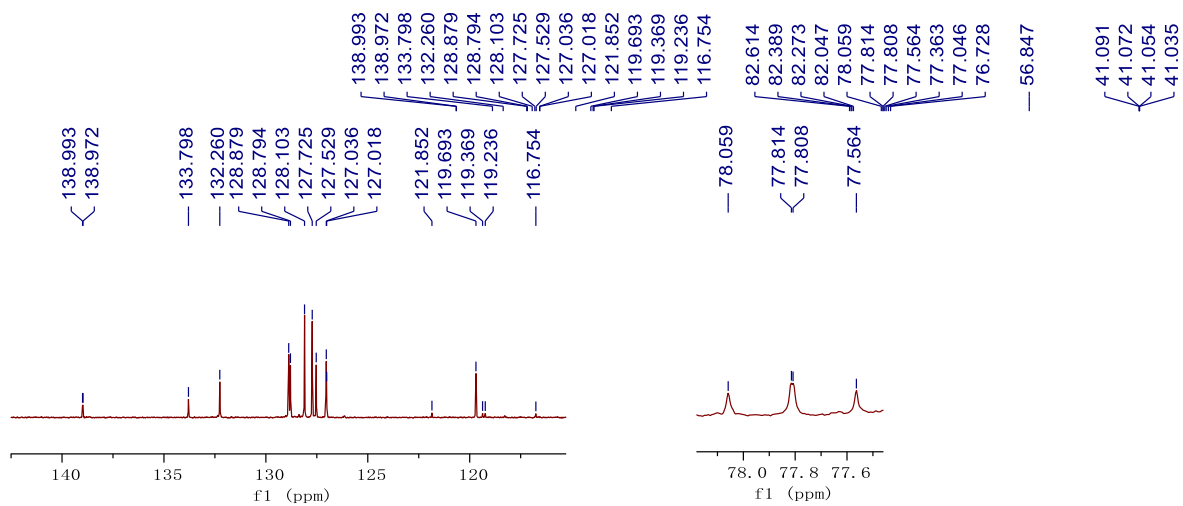

GOY-GC-146-400M-C

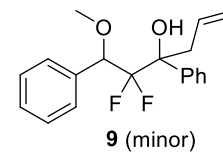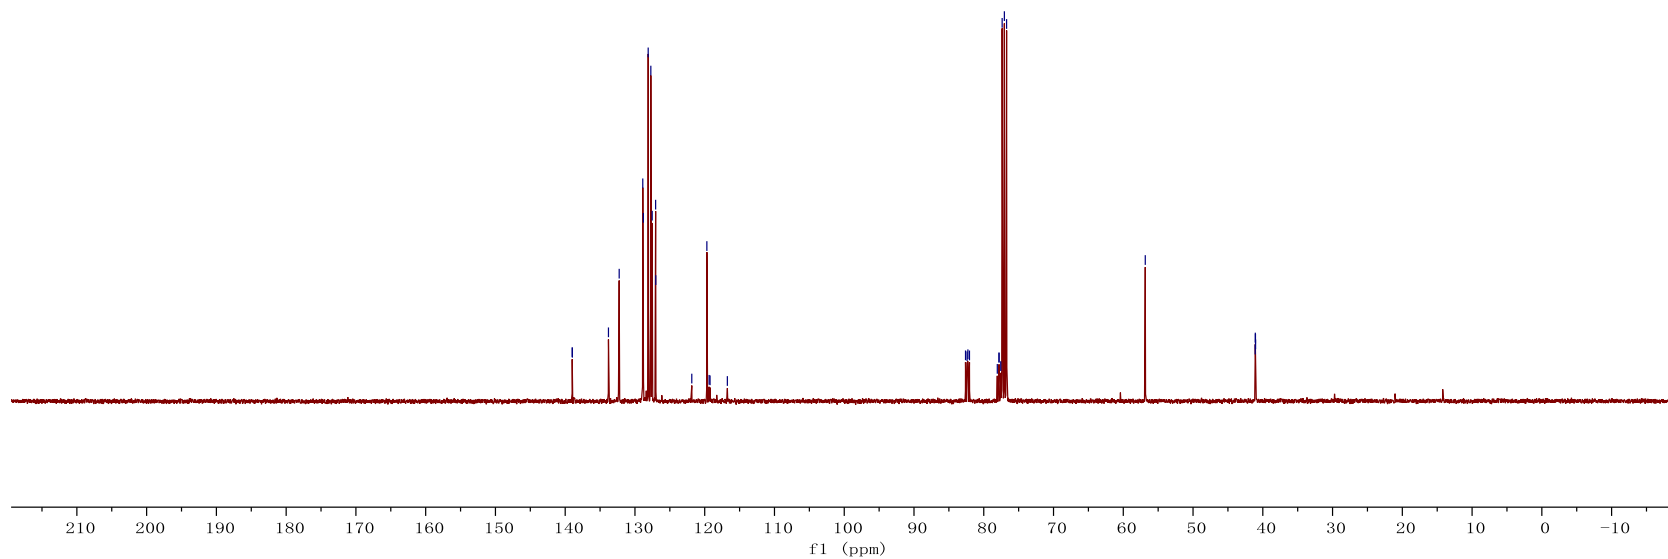

GOY-GC-146-400M-F

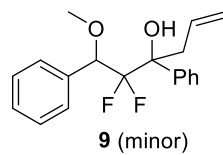

-109.109  
-109.812

-121.689  
-122.393

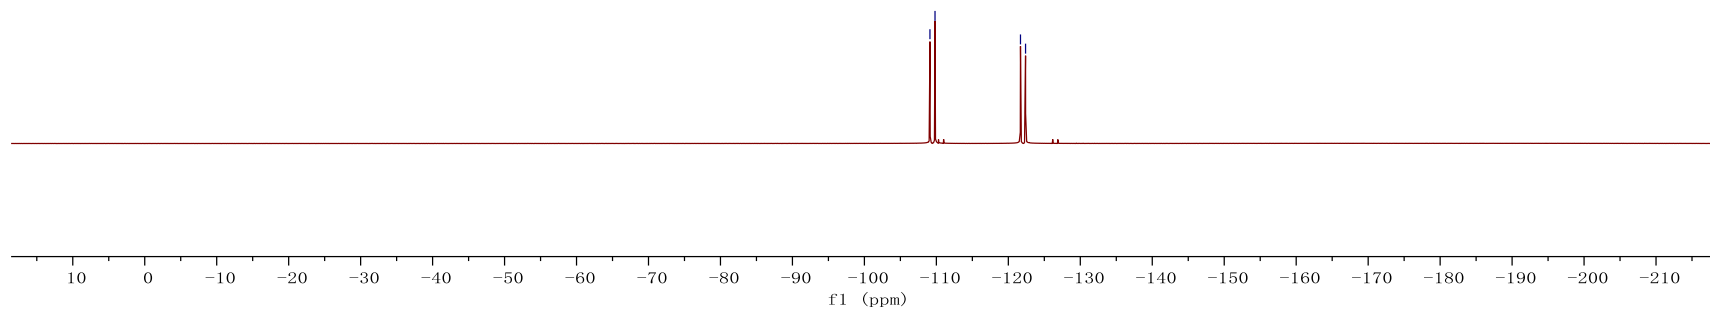

Supplement: c9ob02129a1.pdf [file c9ob02129a1.pdf]
